# Supplementary material for: A multifaceted proteomics strategy in combination with an updated proteome provides insights into the mechanism of calcification in coccolithophores
Source: Research Square preprint supplement (doi:10.21203/rs.3.rs-2039048/v1), 2022-09-15
Supplement: Supplementary file 1 [file 7abc57df6f1c33326f6c67fa.xlsx]

## Sheet: COPROs
Protein ID	Putative locus	Protein Group ID	Indistinguishable proteins	Protein Probability	Percentage coverage	Peptide count	Modified peptides	Spectral count	Normalized spectral counts	Replicate 1 spectral counts	Replicate 2 spectral counts	Replicate 3 spectral counts	ORF length	ORF completeness	Identical Emihu1 proteins	Emihu1 annotation	localization	orthogroup	OG age	OG notes	Annotation	Pfam domains	Number of transmembrane domains	% Disordered	% low complexity	Most enriched residue	Enrichement of most enriched residue	Second most enriched residue	Enrichement of second most enriched residue	Pairs of similar COPROs based on enriched motifs	Total count of instances of enriched motifs	Motif based cluster	MW(kDa)
Br15983.t1	Braker	Coc52	Br15983.t1	1	22.804	14	none	20	3.37838	12	4	4	592	NA	4.61335e+44	none	signal peptide	OG0011933	Unknown	NA	unknown function	PF13599 Pentapeptide repeats (9 copies) 3.7E-09	0	41.5541	16.5541	C	3.67822	F	1.51903	Br15983.t1-EhG26439.1 0.968; Br15983.t1-EhG40669.2 0.903	53	cluster 3	59
Br16934.t1	Braker	Coc53	Br16934.t1	0.9994	7.776	5	none	20	3.61664	9	9	2	553	NA		none	other localisation	OG0010193	SAR/Hapista	NA	unknown function	PF08939 Domain of unknown function (DUF1917) 2.6E-17	0	75.9494	45.0271	K	2.92409	E	2.02337	Br16934.t1-EhG26800.2 0.998	57	cluster 6	57
Br17583.t1	Braker	Coc36	Br17583.t1	1	8.967	6	none	5	1.3587	4	1	0	368	NA		none	other localisation	OG0011071	Phaocystales	NA	unknown function	NA	0	85.0543	60.3261	E	3.13022	K	2.15182	Br17583.t1-Br8280.t1 0.724	46	cluster 6	38
Br21084.t1	Braker	Coc24	Br21084.t1	0.9969	8.197	3	none	4	1.0929	2	1	1	366	NA		none	other localisation	OG0000054	Archaeplastida	NA	unknown function	6x PF01436 NHL repeat 7.6E-08	0	28.6885	16.3934	T	2.98287	N	2.41667	Br21084.t1-EhG37449.1 0.874	21	cluster 7	37
Br27222.t1	Braker	Coc63	Br27222.t1	1	13.47	8	none	89	20.3196	41	38	10	438	NA		none	signal anchor	OG0020725	Unknown	NA	unknown function	NA	1	61.1872	28.5388	P	2.6038	K	1.80858	Br27222.t1-EhG38955.4 0.812; Br27222.t1-EhG22334.1 0.825; Br27222.t1-EhG40536.1 0.805	105	cluster 2	46
Br27440.t1	Braker	Coc25	Br27440.t1	1	5.74	3	VQAPQSLS[167]PR	45	9.93377	16	29	0	453	NA		none	other localisation	OG0008284	Haptophyta	NA	unknown function	NA	0	94.2605	42.6049	K	2.47855	G	1.90583	NA	51	NA	47
Br34828.t1	Braker	Coc28	Br51203.t1,Br34828.t1	1	5.665	6	KGGADS[167]DEEAEVDADFGR,GGADS[167]DEEAEVDADFGR	6	0.693642	3	3	0	865	NA		none	other localisation	OG0010254	SAR/Hapista	NA	unknown function	PF01588 Putative tRNA binding domain 6.6E-12	0	85.6647	64.5087	K	3.05281	D	1.84468	NA	54	cluster 5	87
Br37726.t1	Braker	Coc31	Br37726.t1	1	13.295	11	none	40	5.78035	23	15	2	692	NA		none	other localisation	OG0004574	Gephyrocapsa	Coccolithophore specific in 2/6 species	unknown function	NA	0	25.4335	0	N	3.6875	Y	2.10938	NA	56	NA	76
Br50859.t1	Braker	Coc4	Br50859.t1,Br18456.t1	1	4.119	4	none	14	2.30643	11	3	0	607	NA		none	signal peptide	OG0010491	Haptophyta	NA	Alcohol dehydrogenase	PF08240 Alcohol dehydrogenase GroES-like domain 6.1E-07	0	63.0972	34.2669	E	2.11853	D	1.8234	Br50859.t1-EhG4487.3 0.818; Br50859.t1-EhG17150.1 0.933	50	cluster 5	63
Br8280.t1	Braker	Coc36	Br8280.t1,Br51579.t1	1	13.313	7	none	41	12.6935	33	8	0	323	NA		none	other localisation	OG0011071	Phaocystales	NA	unknown function	PF17800 Nucleoplasmin-like domain 3.7E-05	0	71.517	57.5851	E	2.84307	K	2.65677	Br8280.t1-EhG33950.1 0.729; Br17583.t1-Br8280.t1 0.724	44	cluster 6	33
Br844.t1	Braker	Coc6	Br844.t1	1	28.402	10	none	36	21.3018	30	3	3	169	NA		none	signal peptide	NA	Unknown	No Orthogroup	unknown function	NA	0	40.2367	8.87574	C	2.0495	H	1.8565	NA	15	NA	18
EhG10089.3	EhG35593EhG10089	Coc40	EhG10089.1,EhG35593.1,EhG35593.3,EhG10089.3	1	30.631	13	RS[167]DS[167]DS[167]PPR,GGS[167]PEGGDS[167]AEGGDSPER,GGS[167]PEGGDSAEGGDS[167]PER,ERRS[167]DS[167]DS[167]PPR,GGS[167]PEGGDS[167]AEGGDS[167]PER,RRGGS[167]PEGGDS[167]AEGGDS[167]PER,ERRS[167]DS[167]DSPPR,RGGS[167]PEGGDS[167]AEGGDS[167]PER,RGGS[167]PEGGDS[167]AEGGDS[167]PERVDGGK,RGGS[167]PEGGDS[167]AEGGDSPER	53	15.9159	51	2	0	333	complete	358883372365	none	other localisation	OG0000312	Archaeplastida	NA	unknown function	NA	0	75.3754	41.4414	D	3.06596	R	2.48346	NA	40	NA	39
EhG10953.4	EhG10953	Coc41	EhG10953.4	1	70.213	12	none	79	56.0284	36	43	0	141	complete		none	other localisation	OG0003983	Archaeplastida	NA	unknown function	PF14580 Leucine-rich repeat 1.9E-10	0	23.4043	0	L	2.03067	N	1.84896	NA	19	NA	15
EhG10991.2	EhG10991	Coc7	EhG10991.2	1	16.738	5	RGDS[167]DS[167]DSYYEK,RGDS[167]DS[167]DS[167]YYEK,EEEDDRRGDS[167]DS[167]DS[167]YYEK,RGDS[167]DSDS[167]YYEK,RGDSDS[167]DSYYEK,RGDSDS[167]DS[167]YYEK,EEEDDRRGDS[167]DS[167]DSYYEK	43	18.4549	39	4	0	233	complete	1.0918e+17	none	other localisation	OG0000550	Archaeplastida	NA	unknown function	PF00076 RNA recognition motif 9.5E-11	0	82.4034	63.5193	K	3.68317	D	3.19574	EhG10991.2-EhG16945.1 0.796; EhG10991.2-EhG19611.2 0.746; EhG10991.2-EhG19997.1 0.75	45	cluster 4	26
EhG11560.1	EhG24018EhG11560	Coc30	EhG24018.1,EhG11560.1,Br35727.t1	1	12.195	4	none	13	4.52962	11	2	0	287	complete	60826	none	other localisation	OG0000092	Archaeplastida	NA	unknown function	NA	0	76.3066	25.784	G	1.75785	K	1.72607	NA	37	NA	30
EhG13787.3	EhG13787	Coc23	Br20450.t1,EhG13787.3,EhG13787.1	1	28.782	15	none	231	85.2399	103	82	46	271	complete		none	signal peptide	OG0010506	Calcihaptophyta	Coccolithophore specific in Gephyrocapsa Zygodiscales Coccolithales	unknown function	NA	0	49.4465	33.5793	W	2.03448	P	1.67251	NA	22	NA	30
EhG14169.1	EhG14169	Coc91	Br31695.t1,EhG14169.1,Br23555.t1	0.9981	4.051	1	none	5	1.26582	3	2	0	395	5primepartial	3.52923e+17	none	other localisation	OG0083309	E_huxleyi	Coccolithophore specific in 1/6 species	unknown function	NA	0	99.7468	82.2785	R	2.35115	E	2.19699	NA	31	NA	43
EhG16945.1	EhG16945	Coc78	EhG16945.3,Br50040.t1,Br38287.t1,EhG16945.1	0.9996	3.276	2	none	6	0.936037	5	1	0	641	complete		none	other localisation	OG0000564	SAR/Hapista	NA	unknown function	3x PF00313 'Cold-shock' DNA-binding domain 3E-13	0	83.9314	50.078	G	3.5852	M	2.52973	EhG19611.2-EhG16945.1 0.835; EhG19997.1-EhG16945.1 0.838; EhG10991.2-EhG16945.1 0.796	49	cluster 4	61
EhG17150.1	EhG17150EhG13701	Coc8	EhG13701.3,EhG17150.1	1	24.342	7	none	20	13.1579	11	9	0	152	5primepartial		none	other localisation	OG0011031	Haptophyta	NA	unknown function	NA	0	99.3421	51.9737	E	4.06344	D	2.65957	EhG17150.1-EhG4487.3 0.763; Br50859.t1-EhG17150.1 0.933	38	cluster 5	16
EhG17242.1	EhG17242	Coc23	EhG17242.1,EhG17242.4,Br12407.t1	1	42.162	15	none	209	112.973	86	77	46	185	complete		none	signal peptide	OG0010506	Calcihaptophyta	Coccolithophore specific in Gephyrocapsa Zygodiscales Coccolithales	unknown function	NA	0	23.7838	7.02703	W	2.97931	M	2.33514	NA	22	NA	20
EhG17242.7	EhG17242	Coc23	EhG17242.7	1	49.63	15	none	204	151.111	77	79	48	135	complete		none	signal peptide	OG0010506	Calcihaptophyta	Coccolithophore specific in Gephyrocapsa Zygodiscales Coccolithales	unknown function	NA	0	25.9259	18.5185	W	2.55172	M	2.4	NA	23	NA	15
EhG17794.1	EhG17794	Coc22	EhG17794.1,Br15030.t1	1	8.627	4	none	4	0.784314	3	0	1	510	complete		none	other localisation	OG0032744	Gephyrocapsa	Coccolithophore specific in 2/6 species	unknown function	5x PF00805 Pentapeptide repeats (8 copies) 1.2E-08	0	35.8824	17.6471	P	1.92105	T	1.51178	NA	44	NA	53
EhG17918.2	EhG17918	Coc61	EhG17918.2	1	49.189	23	C[160]T[181]GFDYGFDASR	409	221.081	156	166	87	185	complete	232589	none	signal peptide	OG0018694	Gephyrocapsa	Coccolithophore specific in 2/6 species	unknown function	NA	0	58.3784	43.7838	P	3.71491	C	2.67822	EhG17918.2-EhG34055.2 0.996; EhG42278.1-EhG17918.2 0.755	39	cluster 8	19
EhG19599.2	EhG21353EhG20011EhG19599EhG10240	Coc96	EhG20011.2,Br19874.t1,EhG21353.2,EhG21353.1,EhG10240.1,EhG19599.2,EhG19599.1,EhG20011.1,EhG20011.4,EhG20011.3,EhG19599.4	0.9954	10.881	2	none	2	1.03627	1	1	0	193	complete		none	other localisation	OG0000008	Archaeplastida	NA	Ca binding protein	2x PF13499 EF-hand domain pair 2.3E-18 1.2E-15	0	68.9119	15.0259	M	2.8	E	1.90317	NA	25	NA	21
EhG19611.2	EhG19611	Coc47	EhG19611.2	1	51.341	22	RNDDS[167]PPPRDEVAM[147]DNTED,RYSDS[167]ES[167]PPR,GRKDYS[167]DS[167]ES[167]PPR,RYSDS[167]ESPPR,RYS[167]DS[167]ES[167]PPRR,RYS[167]DSESPPR,DYS[167]DSESPPR,YS[167]DS[167]ESPPR,RYS[167]DS[167]ESPPR,NDDS[167]PPPR,DYS[167]DS[167]ES[167]PPRDR,YSDS[167]ES[167]PPR,DYS[167]DS[167]ESPPR,RNDDS[167]PPPR,RYS[167]DSES[167]PPR,DYSDS[167]ESPPR,RYS[167]DS[167]ES[167]PPR,DDS[167]RGRGGYGG,YS[167]DS[167]ES[167]PPR,…	318	121.839	268	50	0	261	complete		none	other localisation	OG0009070	Prymnesiales	NA	unknown function	PF00642 Zinc finger C-x8-C-x5-C-x3-H type (and similar) 1.6E-06	0	99.6169	56.3218	D	2.93404	R	2.29135	EhG19611.2-EhG16945.1 0.835; EhG19997.1-EhG19611.2 0.996; EhG10991.2-EhG19611.2 0.746	52	cluster 4	29
EhG19997.1	EhG19997	Coc47	EhG19997.1	1	51.341	22	RYS[167]DS[167]ESPPR,YS[167]DS[167]ESPPR,DYS[167]DSESPPR,RYS[167]DSESPPR,YSDS[167]ES[167]PPR,DYS[167]DS[167]ES[167]PPRDR,NDDS[167]PPPR,GRKDYS[167]DS[167]ES[167]PPR,RNDDS[167]PPPRDEVAM[147]DNTED,RYSDS[167]ES[167]PPR,RYS[167]DS[167]ES[167]PPRR,RYSDS[167]ESPPR,DDS[167]RGRGGYGG,RYS[167]DS[167]ES[167]PPR,DYSDS[167]ES[167]PPR,DYS[167]DSES[167]PPR,YSDS[167]ESPPR,DYSDS[167]ES[167]PPRDR,DYS[167]DS[167]ES[…	306	117.241	244	57	5	261	complete		none	other localisation	OG0009070	Prymnesiales	NA	unknown function	PF00642 Zinc finger C-x8-C-x5-C-x3-H type (and similar) 1.6E-06	0	99.6169	56.3218	D	2.85319	R	2.29135	EhG19997.1-EhG16945.1 0.838; EhG19997.1-EhG19611.2 0.996; EhG10991.2-EhG19997.1 0.75	51	cluster 4	29
EhG20254.1	EhG4826EhG20254	Coc31	EhG20254.1,EhG4826.1,EhG4826.3,EhG4826.4,EhG4826.2	0.9959	4.457	5	none	26	2.97143	13	12	1	875	complete		none	signal peptide	OG0004574	Gephyrocapsa	Coccolithophore specific in 2/6 species	unknown function	NA	0	42.5143	20.3429	N	2.85938	P	2.3231	NA	84	NA	93
EhG21037.1	EhG30741EhG21037	Coc49	EhG21037.1,EhG30741.1,EhG21037.3	1	13.208	5	none	8	2.15633	7	0	1	371	complete	86680	none	signal peptide	OG0015362	Calcihaptophyta	Coccolithophore specific in 5/6 species	unknown function	4x PF00805 Pentapeptide repeats (8 copies) 2.1E-08	0	26.4151	5.92992	D	2.00638	N	1.96354	NA	35	NA	40
EhG21537.1	EhG21537EhG13810	Coc43	EhG21537.1,EhG13810.1	1	48.925	12	none	111	59.6774	70	27	14	186	complete		none	signal peptide	OG0022836	Calcihaptophyta	Coccolithophore specific in 5/6 species	unknown function	NA	0	61.2903	18.2796	M	2.32432	N	2.23958	NA	17	NA	20
EhG21785.1	EhG43883EhG21785	Coc50	EhG21785.1,EhG43883.2,EhG43883.1	1	27.239	9	none	44	16.4179	28	15	1	268	complete		none	other localisation	OG0006228	Archaeplastida	NA	unknown function	PF17820 PDZ domain 1.3E-08	0	80.597	52.6119	D	3.88936	E	3.42571	EhG21785.1-EhG6475.1 0.708	52	cluster 10	29
EhG21825.1	EhG21825	Coc46	EhG21825.1	0.9999	61.111	6	none	62	68.8889	28	18	16	90	5prime_partial		none	other localisation	OG0018885	Unknown	NA	unknown function	NA	0	20	0	C	4.40099	K	2.56766	NA	14	NA	10
EhG22334.1	EhG22334EhG16922	Coc63	EhG16922.1,EhG22334.1,Br41270.t1	0.9992	31.343	5	none	64	47.7612	18	43	3	134	5primepartial		none	other localisation	OG0005437	Unknown	NA	unknown function	NA	0	41.0448	20.8955	K	2.70957	C	2.21782	EhG22334.1-EhG38955.4 0.701; EhG40536.1-EhG22334.1 0.789; Br27222.t1-EhG22334.1 0.825	47	cluster 2	14
EhG26439.1	EhG26439	Coc52	EhG26439.1	1	26.714	16	none	38	6.67838	21	10	7	569	complete	738657386773868	none	signal peptide	OG0011933	Unknown	NA	unknown function	PF13599 Pentapeptide repeats (9 copies) 3.9E-09	0	42.355	13.181	C	3.82673	T	1.61884	EhG40669.2-EhG26439.1 0.964; Br15983.t1-EhG26439.1 0.968	53	cluster 3	58
EhG26800.2	EhG26800	Coc53	EhG26800.2	1	15.455	6	none	24	10.9091	13	9	2	220	5primepartial		none	other localisation	OG0083017	Gephyrocapsa	Coccolithophore specific in 2/6 species	unknown function	NA	0	99.5455	85.9091	K	3.74917	E	2.50417	Br16934.t1-EhG26800.2 0.998	41	cluster 6	22
EhG26900.2	EhG26900	Coc54	EhG26900.2	1	9.605	6	none	13	2.22985	8	3	2	583	complete		none	other localisation	OG0014309	Calcihaptophyta	Coccolithophore specific in 5/6 species	unknown function	3x PF00805 Pentapeptide repeats (8 copies) 1.1E-09 1.5E-08 2E-12	0	45.6261	28.6449	P	3.21053	F	1.71972	NA	59	NA	62
EhG27455.5	EhG27455	Coc55	EhG27455.5	1	26.047	28	none	175	40.6977	123	47	5	430	complete		none	other localisation	OG0040573	E_huxleyi	Coccolithophore specific in 1/6 species	unknown function	NA	0	99.7674	84.6512	D	5.68936	S	2.45679	EhG38599.8-EhG27455.5 0.995	51	cluster 10	44
EhG27698.2	EhG27698	Coc63	EhG27698.2	0.9999	45.794	6	none	41	38.3178	27	12	2	107	5primepartial		none	other localisation	OG0032958	E_huxleyi	Coccolithophore specific in 1/6 species	unknown function	NA	0	42.9907	14.9533	K	3.39274	Y	2.43229	NA	49	NA	12
EhG28195.1	EhG28195	Coc56	EhG28195.1	1	23.206	15	none	25	3.81679	22	1	2	655	complete	356894356895	none	signal peptide	OG0040581	Gephyrocapsa	Coccolithophore specific in 2/6 species	unknown function	NA	0	76.1832	45.8015	A	1.87639	P	1.53947	NA	41	NA	66
EhG29815.1	EhG29815	Coc37	EhG29815.1,Br51633.t1	1	25.926	8	none	16	5.92593	7	9	0	270	complete		none	other localisation	OG0018897	Phaocystales	NA	unknown function	NA	0	85.9259	47.7778	E	3.21536	K	2.93399	EhG29815.1-EhG6475.1 0.782; EhG29815.1-EhG4487.3 0.811	39	cluster 5	30
EhG30161.1	EhG30161	Coc3	EhG30161.1,Br16581.t1	1	6.332	2	none	6	1.31004	1	2	3	458	complete	2.30461e+41	none	signal peptide	OG0007889	Calcihaptophyta	Coccolithophore specific in 5/6 species	unknown function	7x pentapeptide repeats (PF13599 PF00805) 2.6E-10	0	45.1965	29.0393	P	2.42544	T	1.44968	NA	45	cluster 3	47
EhG31424.1	EhG31424EhG25061	Coc11	EhG25061.2,EhG31424.1,EhG25061.1	1	2.487	6	none	7	0.446429	6	1	0	1568	complete		none	other localisation	OG0000004	Archaeplastida	NA	Myosin	PF00063 Myosin head (motor domain) 1.7E-191	0	49.6173	12.9464	K	2.61056	Q	1.62939	NA	60	NA	172
EhG32342.1	EhG32342	Coc31	EhG32342.1	1	5.47	5	none	38	5.32959	16	21	1	713	complete		none	signal peptide	OG0033183	Unknown	NA	unknown function	PF13540 Regulator of chromosome condensation (RCC1) repeat 0.0001	2	48.2468	28.0505	P	2.58333	C	2.08416	NA	74	NA	73
EhG33119.2	EhG33119EhG29946	Coc27	Br39328.t1,EhG33119.2,EhG29946.1,Br32137.t1	1	11.288	9	RDS[167]FQSS[167]VEGR,RDS[167]FQS[167]S[167]VEGR,LM[147]INDADS[167]S[167]R,RDS[167]FQS[167]SVEGR,S[167]QEFEVEEDISK,RDS[167]FQSSVEGR	11	1.5919	9	2	0	691	complete	275444	none	other localisation	OG0023426	Gephyrocapsa	Coccolithophore specific in 2/6 species	unknown function	NA	0	98.2634	28.22	K	1.81518	S	1.7476	NA	55	NA	71
EhG33272.1	EhG33272EhG19361	Coc63	EhG19361.1,EhG33272.1,EhG19361.2	0.9995	10.413	9	none	181	29.9174	84	57	40	605	complete		none	signal anchor	OG0005437	Unknown	NA	unknown function	PF00629 MAM domain, meprin/A5/mu 4.7E-30	0	68.595	51.7355	P	4.25292	S	2.22222	NA	93	cluster 2	61
EhG33950.1	EhG33950	Coc60	EhG33950.1	1	26.26	16	none	82	21.7507	58	20	4	377	complete	99913	none	other localisation	OG0001902	Archaeplastida	NA	unknown function	PF17800 Nucleoplasmin-like domain 1.4E-18	0	85.9416	47.4801	E	3.76461	K	2.53795	Br8280.t1-EhG33950.1 0.729	58	cluster 6	41
EhG34055.2	EhG34055	Coc61	EhG34055.2	1	49.721	27	C[160]T[181]GFDYGFDASR	405	226.257	155	165	85	179	5primepartial		none	other localisation	OG0018694	Gephyrocapsa	Coccolithophore specific in 2/6 species	unknown function	NA	0	58.6592	34.0782	P	3.59357	C	2.76733	EhG17918.2-EhG34055.2 0.996; EhG42278.1-EhG34055.2 0.754	34	cluster 8	19
EhG34604.1	EhG34604	Coc63	EhG34604.1,EhG34604.2	1	12.061	8	none	108	23.6842	57	30	21	456	complete		none	signal peptide	OG0005437	Unknown	NA	unknown function	2x PF03382 Mycoplasma protein of unknown function, DUF285 7.9E-25 3.2E-38	0	33.3333	11.8421	M	2.25405	W	2.11724	EhG34604.1-EhG4764.1 0.959; EhG34604.1-EhG4774.4 0.954	108	cluster 1	49
EhG37449.1	EhG37449EhG32129	Coc79	EhG32129.1,EhG37449.1	0.9996	23.958	2	none	10	10.4167	9	1	0	96	complete		none	other localisation	OG0009942	Haptophyta	NA	unknown function	NA	0	77.0833	31.25	D	3.54681	E	3.13022	Br21084.t1-EhG37449.1 0.874	20	cluster 7	11
EhG38599.8	EhG38599	Coc55	EhG38599.8	1	22.843	15	none	103	26.1421	82	18	3	394	complete		none	other localisation	OG0040573	E_huxleyi	Coccolithophore specific in 1/6 species	unknown function	NA	0	99.7462	83.2487	D	5.61702	S	2.36763	EhG38599.8-EhG27455.5 0.995	52	cluster 10	41
EhG38955.4	EhG38955	Coc63	EhG38955.1,EhG38955.4,EhG38955.2	1	7.477	9	none	113	11.7342	56	41	16	963	complete		none	other localisation	OG0032616	E_huxleyi	Coccolithophore specific in 1/6 species	unknown function	NA	1	65.2129	12.4611	C	2.88119	N	2.10938	EhG22334.1-EhG38955.4 0.701; EhG40536.1-EhG38955.4 0.838; Br27222.t1-EhG38955.4 0.812	86	cluster 2	100
EhG40536.1	EhG40536	Coc63	EhG40536.1	1	28.328	13	none	202	68.942	85	76	41	293	complete		none	other localisation	OG0015737	Phaocystales	NA	unknown function	NA	0	61.7747	37.5427	P	4.84064	C	2.0297	EhG40536.1-EhG38955.4 0.838; EhG40536.1-EhG22334.1 0.789; Br27222.t1-EhG40536.1 0.805	76	cluster 2	30
EhG40669.2	EhG40669	Coc64	EhG40669.2	1	22.626	13	none	47	9.49495	29	7	11	495	complete		none	signal peptide	OG0027176	Gephyrocapsa	Coccolithophore specific in 2/6 species	unknown function	NA	0	34.5455	17.5758	T	2.16274	F	2.09689	EhG40669.2-EhG26439.1 0.964; Br15983.t1-EhG40669.2 0.903	36	cluster 3	51
EhG41650.1	EhG41650	Coc65	EhG41650.1	1	38.869	54	none	292	34.3934	164	104	24	849	complete		none	other localisation	OG0020749	Gephyrocapsa	Coccolithophore specific in 2/6 species	unknown function	NA	1	65.0177	34.5112	G	1.61099	A	1.34167	EhG41650.1-EhG42557.1 0.923	52	cluster 9	85
EhG42278.1	EhG42278	Coc31	EhG42278.1	1	7.175	7	none	41	4.6697	30	9	2	878	complete	125456	none	signal peptide	OG0004574	Gephyrocapsa	Coccolithophore specific in 2/6 species	unknown function	NA	0	36.2187	15.9453	N	3.08333	P	2.48099	EhG42278.1-EhG34055.2 0.754; EhG42278.1-EhG17918.2 0.755	70	cluster 8	94
EhG42557.1	EhG42557	Coc65	EhG42557.1	0.9999	19.919	11	none	28	11.3821	17	10	1	246	5primepartial		none	other localisation	OG0020749	Gephyrocapsa	Coccolithophore specific in 2/6 species	unknown function	NA	1	42.6829	21.5447	G	2.14238	F	1.54671	EhG41650.1-EhG42557.1 0.923	31	cluster 9	25
EhG43196.1	EhG43196EhG24422	Coc71	EhG24422.1,Br1019.t1,EhG43196.1,Br32455.t1	0.9999	13.684	2	none	8	8.42105	4	3	1	95	5prime_partial	117966	none	other localisation	OG0000093	Archaeplastida	NA	unknown function	PF00628 PHD-finger 1.1E-09	0	60	26.3158	C	3.64851	P	2.77047	NA	18	NA	10
EhG44657.2	EhG44657	Coc63	EhG44657.2	1	9.166	10	none	101	13.8167	52	30	19	731	complete		none	other localisation	OG0014501	Unknown	NA	Glycosyl transferase	PF01501 Glycosyl transferase family 8 2.5E-07	0	25.171	4.51436	Y	1.70833	F	1.609	NA	75	NA	82
EhG4487.3	EhG4487	Coc41	EhG4487.3	1	16.889	10	DEDVDS[167]LL	189	42	66	117	6	450	5primepartial		none	other localisation	OG0003983	Archaeplastida	NA	unknown function	NA	0	89.5556	29.1111	R	1.69593	G	1.46973	EhG17150.1-EhG4487.3 0.763; EhG29815.1-EhG4487.3 0.811; Br50859.t1-EhG4487.3 0.818	37	cluster 5	48
EhG4764.1	EhG4764	Coc63	EhG4764.1	1	15.842	9	none	150	37.1287	73	50	27	404	complete		none	signal peptide	OG0005437	Unknown	NA	unknown function	PF03382 Protein of unknown function DUF285 4.8E-30	0	41.0891	20.0495	S	2.17284	W	2.04828	EhG4774.4-EhG4764.1 0.929; EhG34604.1-EhG4764.1 0.959	105	cluster 1	42
EhG4774.4	EhG4774	Coc63	EhG4774.4	1	13.1	7	none	151	32.9694	64	49	38	458	complete		none	signal peptide	OG0005437	Unknown	NA	unknown function	PF03382 Mycoplasma protein of unknown function, DUF285 4.8E-35	0	53.0568	19.6507	S	2.03704	M	2.00541	EhG4774.4-EhG4764.1 0.929; EhG34604.1-EhG4774.4 0.954	93	cluster 1	48
EhG4886.2	EhG4886EhG20200	Coc10	EhG4886.1,EhG4886.2,EhG20200.1	1	21.264	3	none	9	5.17241	0	8	1	174	complete		none	other localisation	OG0000008	Archaeplastida	NA	Ca binding protein	2x PF13499 EF-hand domain pair 7.7E-17 and 6E-13	0	81.0345	5.17241	K	3.41254	M	3.10811	NA	37	cluster 10	20
EhG5157.1	EhG5157	Coc14	EhG5157.1	1	31.847	12	none	21	6.6879	14	7	0	314	5primepartial	2.15605e+35	none	signal peptide	OG0032481	Gephyrocapsa	Coccolithophore specific in 2/6 species	unknown function	PF00805 Pentapeptide repeats (8 copies) 3.5E-10	0	32.8025	0	N	2.98438	C	2.20792	NA	31	NA	32
EhG6475.1	EhG6475EhG617	Coc66	EhG6475.30,EhG6475.1,EhG6475.25,EhG617.19	1	19.401	16	none	27	3.85164	22	5	0	701	complete		none	signal peptide	OG0001684	Archaeplastida	NA	unknown function	NA	0	17.689	5.27817	D	2.09362	N	1.70833	EhG21785.1-EhG6475.1 0.708; EhG29815.1-EhG6475.1 0.782	54	cluster 5	74
EhG7803.1	EhG7803EhG28660	Coc57	EhG28660.1,EhG7803.1,EhG28660.3	1	30.909	9	QQGS[167]EDEDDHRPIAK,KEES[167]EES[167]DEGPDPETM[147]RK,KEES[167]EES[167]DEGPDPETM[147]R	90	54.5455	45	41	4	165	complete		none	other localisation	OG0008630	Haptophyta	NA	unknown function	NA	0	99.3939	33.9394	M	2.62162	K	2.60066	NA	36	cluster 6	18
EhG875.2	EhG875	Coc60	EhG875.2	1	34.821	9	EEDDES[167]EEEEAPPPPSK	55	49.1071	38	17	0	112	complete		none	other localisation	OG0001902	Archaeplastida	NA	unknown function	PF00249 Myb-like DNA-binding domain 1.1E-05	0	99.1071	58.9286	K	5.30363	A	1.67431	NA	35	NA	11
EhG9088.1	EhG9088EhG36519	Coc68	EhG36519.1,EhG9088.1	1	52.764	19	none	127	63.8191	60	49	18	199	5primepartial		none	other localisation	OG0012409	Calcihaptophyta	Coccolithophore specific in Gephyrocapsa Zygodiscales Coccolithales	unknown function	NA	0	36.1809	10.0503	K	1.9901	E	1.34224	NA	27	NA	21
EhG9088.3	EhG9088	Coc68	EhG9088.3	1	41.88	21	none	106	45.2991	58	34	14	234	5primepartial		none	other localisation	OG0012409	Calcihaptophyta	Coccolithophore specific in Gephyrocapsa Zygodiscales Coccolithales	unknown function	NA	0	51.2821	8.54701	Y	1.55729	K	1.55116	NA	24	NA	24
EhG9823.24	EhG9823EhG8172EhG7640EhG31490	Coc59	EhG31490.1,EhG9823.28,EhG9823.41,EhG9823.39,EhG8172.28,EhG9823.59,EhG9823.3,EhG8172.35,EhG9823.38,EhG9823.56,EhG9823.5,EhG8172.27,EhG9823.24,EhG8172.7,EhG9823.9,EhG9823.47,EhG8172.44,EhG9823.2,EhG8172.9,EhG8172.33,EhG8172.6,EhG8172.2,EhG9823.49,EhG9823.8,EhG9823.57,EhG8172.20,EhG9823.22,EhG9823.21,EhG8172.34,EhG7640.1,EhG9823.16	1	8.26	12	none	68	8.51064	7	53	8	799	complete	2.83794e+85	none	other localisation	OG0000110	Archaeplastida	NA	HSP90	PF00183 Hsp90 protein 4E-233	0	46.1827	19.2741	K	3.26403	I	2.00746	NA	61	NA	91

## Sheet: Legend
	Protein ID	Lead protein ID of protein group
	Putative locus	Concatenation of protein IDs that may be allelic. Two proteins sharing the same putative locus ID are putative allels. Theis information is not provided for Braker pipeline derrived IDs
	Protein Group ID	Unique identifier of the protein group identified in the experiment (protein groups share peptide information) to which this protein belongs. If two proteins in the list have the same protein group identifier, then they share some of their peptide evidence.
	Indistinguishable proteins	Proteins indistinguishable in this experiment based on the available MS evidence
	Protein Probability	1 - posterior error probability, as calculated by Protein Prophet
	Percentage coverage	Percentage of the sequence covered by the peptides identified
	Peptide count	Number of unique peptides assigned to the protein
	Modified peptides	Sequence, modification site and mass of modified peptides
	Spectral count	Number of spectra counts summed accross all conditions and replicates
	Normalized spectral counts	Spectral counts normalized to the length of the protein sequences (counts per 100 residues)
	Replicate 1 spectral counts
	Replicate 2 spectral counts
	Replicate 3 spectral counts
	ORF length
	ORF completeness	If the ORF was classed as complete by Transdecoder or gmst during the ORF finding process. If labelled incomplete this may be an incomplete gene model.
	Identical Emihu1 proteins	Proteins in the Emihu1 database 100% identical to this protein
	Emihu1 annotation	Annotation of any identical proteins in the Emihu1 database
	localization	Localization as predicted by Hectare
	orthogroup	Orthogroup ID
	OG age	Age of the orthogroup this protein belongs to
	OG notes
	Annotation	Annotation based on EggNOG annotation, pfam domains and blast searches
	Pfam domains	Pfam terms: comma separated, giving name, code and e-value
	Number of transmembrane domains
	% Disordered
	% low complexity
	Most enriched residue
	Enrichement of most enriched residue	Fold change relative to background proteome
	Second most enriched residue
	Enrichement of second most enriched residue	Fold change relative to background proteome
	Pairs of similar canLAPs based on enriched motifs	dcor correlation coefficient for pairwise comparisons amoung canLAPs
	Total count of instances of enriched motifs
	Motif based cluster	Clustering using distance matrix based on pairwise dcor values
	MW (kDa)
