# Supplementary material for: A multifaceted proteomics strategy in combination with an updated proteome provides insights into the mechanism of calcification in coccolithophores
Source: Research Square preprint supplement (doi:10.21203/rs.3.rs-2039048/v1), 2022-09-15
Supplement: Supplementary file 3 [file 9cd3448ccca0970bc5e8ffb4.xlsx]

## Sheet: StdCa up 6h light
protein	log(2)FC	adj.P.Val	pfam terms	EggNog text	Localization	OG age
Br16096.t1	0.258253	0.0229185	None	NA	other localisation	Phaocystales
Br2550.t1	0.310313	0.0275922	None	NA	other localisation	NA
Br30844.t1	0.383129	0.0347565	None	endonuclease activity	other localisation	SAR/Hapista
Br35525.t2	0.607581	0.0199771	None	NA	other localisation	NA
Br49211.t1	0.291422	0.0283058	None	Nucleolar protein 6	other localisation	Archaeplastida
EhG10302.23	0.564018	0.00800362	Thioredoxin|PF00085.20|0.0003,Thioredoxin_2|PF13098.6|1.2e-06,Thioredoxin_8|PF13905.6|1.5e-26,Thioredoxin_8|PF13905.6|2.7e-25,AhpC-TSA|PF00578.21|4.5e-07,AhpC-TSA|PF00578.21|3.7e-08,Thioredoxin|PF00085.20|2.3e-06,Redoxin|PF08534.10|1e-06,Thioredoxin_2|PF13098.6|3.3e-08,Redoxin|PF08534.10|9.9e-07	cellular oxidant detoxification	other localisation	Archaeplastida
EhG10302.29	0.598254	0.0326796	NA	cellular oxidant detoxification	signal peptide	Archaeplastida
EhG10922.1	1.0502	0.0266263	MutS_V|PF00488.21|1.1e-23,Smr|PF01713.21|2.2e-13	DNA mismatch repair protein	other localisation	Archaeplastida
EhG11192.1	0.281994	0.0382853	Beta-lactamase|PF00144.24|2.5e-18	Beta-lactamase	other localisation	Archaeplastida
EhG11350.1	0.478619	0.0084247	Rtf2|PF04641.12|5.9e-06,Pro_isomerase|PF00160.21|4.6e-51	peptidyl-prolyl cis-trans isomerase activity	other localisation	Archaeplastida
EhG11391.1	0.274135	0.0222907	NA	NA	chloroplast	Phaocystales
EhG11687.1	0.443449	0.0362395	NA	Chlorophyll A-B binding protein	signal peptide	SAR/Hapista
EhG11698.1	0.278727	0.011162	adh_short|PF00106.25|1.6e-06,adh_short|PF00106.25|1.1e-19,adh_short_C2|PF13561.6|4.1e-07,adh_short_C2|PF13561.6|6.3e-12,KR|PF08659.10|8.6e-10	oxidation-reduction process	signal peptide	Archaeplastida
EhG13227.2	0.919802	6.43661e-05	AAA_21|PF13304.6|0.00063,AAA_21|PF13304.6|4.9e-05,ABC_tran|PF00005.27|1.7e-13,ABC_tran|PF00005.27|4e-19	protein kinase regulator activity	other localisation	Archaeplastida
EhG13900.3	0.455781	0.0466857	NA	NA	signal anchor	Haptophyta
EhG14144.2	0.259239	0.0219365	THOC7|PF05615.13|4.8e-25	mRNA-containing ribonucleoprotein complex export from nucleus	other localisation	Archaeplastida
EhG14216.8	0.660629	0.000650481	Chloroa_b-bind|PF00504.21|6.6e-24	Chlorophyll A-B binding protein	chloroplast	SAR/Hapista
EhG1451.1	0.296215	0.0193233	PGK|PF00162.19|4.2e-140	phosphoglycerate kinase activity	other localisation	Archaeplastida
EhG16682.7	0.445049	0.0296021	Chloroa_b-bind|PF00504.21|1.8e-28	Chlorophyll A-B binding protein	signal peptide	Archaeplastida
EhG16984.6	0.213822	0.0459667	NA	NA	other localisation	Archaeplastida
EhG17023.1	0.248225	0.023559	NA	NA	signal peptide	Gephyrocapsa
EhG17515.1	0.250629	0.0481433	Calreticulin|PF00262.18|1.3e-126	unfolded protein binding	signal peptide	Archaeplastida
EhG17518.1	0.337971	0.0296021	NA	NA	other localisation	NA
EhG17966.1	0.298603	0.0175301	NA	2Fe-2S iron-sulfur cluster binding domain	signal peptide	Archaeplastida
EhG18862.1	0.230414	0.0356166	ASL_C|PF08328.11|4.4e-50,Lyase_1|PF00206.20|8.9e-57	Belongs to the lyase 1 family. Adenylosuccinate lyase subfamily	other localisation	Archaeplastida
EhG19357.1	0.225624	0.0283058	NA	NA	other localisation	E_huxleyi
EhG20152.1	0.199992	0.0405428	Ribosomal_L12_N|PF16320.5|0.00046	NA	signal peptide	Phaocystales
EhG20763.1	0.2103	0.0341135	PheRS_DBD3|PF18553.1|2.1e-12,PheRS_DBD1|PF18552.1|2.4e-06,tRNA-synt_2b|PF00587.25|4.1e-05,tRNA-synt_2d|PF01409.20|5.4e-88	phenylalanyl-tRNA aminoacylation	other localisation	Archaeplastida
EhG21114.1	0.88869	0.0352959	Pribosyltran|PF00156.27|7.3e-21	guanine phosphoribosyltransferase activity	other localisation	Archaeplastida
EhG21166.3	0.224981	0.0442309	NA	Phytanoyl-CoA dioxygenase (PhyH)	signal peptide	SAR/Hapista
EhG21353.1	0.370079	0.0378218	EF-hand_4|PF12763.7|8.7e-05,EF-hand_11|PF08976.11|0.00099,EF-hand_5|PF13202.6|6.1e-05,EF-hand_9|PF14658.6|7.1e-05,EF-hand_5|PF13202.6|0.00063,EF-hand_9|PF14658.6|1.4e-09,EF-hand_7|PF13499.6|2.9e-18,EF-hand_6|PF13405.6|3.8e-09,EF-hand_6|PF13405.6|1.3e-09,EF-hand_8|PF13833.6|4.3e-16,EF-hand_8|PF13833.6|5.8e-14,EF-hand_1|PF00036.32|7.3e-09,EFhand_Ca_insen|PF08726.10|0.00036,EF-hand_5|PF13202.6|9.1e-…	Ca2 -binding protein (EF-Hand superfamily	other localisation	Archaeplastida
EhG21388.1	0.23517	0.0387078	cobW|PF02492.19|2.5e-45,CobW_C|PF07683.14|8.4e-17	ATP binding	other localisation	Archaeplastida
EhG21537.1	0.416324	0.0199771	NA	NA	signal peptide	Calcihaptophyta
EhG21691.1	0.284219	0.0122798	SHNi-TPR|PF10516.9|1e-08	histone exchange	other localisation	Archaeplastida
EhG22643.3	0.261644	0.0275922	F5_F8_type_C|PF00754.25|6.5e-05,Ank_4|PF13637.6|0.00061,Ank_2|PF12796.7|6.4e-08,Ank_2|PF12796.7|0.00012,Ank_5|PF13857.6|0.00046	NA	signal peptide	Archaeplastida
EhG22846.1	0.350202	0.0306698	NA	NA	signal peptide	Prymnesiales
EhG23688.1	0.27887	0.0121877	MCM_lid|PF17855.1|4.6e-16,AAA_5|PF07728.14|2.4e-05,MCM_OB|PF17207.3|1e-27,Mg_chelatase|PF01078.21|2e-05,MCM_N|PF14551.6|3.6e-11,MCM|PF00493.23|3.5e-104	DNA replication initiation	other localisation	Archaeplastida
EhG23698.1	0.292461	0.00653511	GILT|PF03227.16|4.9e-15	oxidoreductase activity, acting on a sulfur group of donors	other localisation	Archaeplastida
EhG23811.1	0.511964	0.0109003	NA	NA	other localisation	Phaocystales
EhG2447.2	0.343468	0.0347565	Tim17|PF02466.19|9.8e-06	NA	other localisation	Archaeplastida
EhG24742.3	0.477976	0.0422964	NA	NA	chloroplast	E_huxleyi
EhG25272.1	0.887537	0.0352959	Aldo_ket_red|PF00248.21|7.9e-21	oxidoreductase activity	signal peptide	SAR/Hapista
EhG25631.2	0.434046	0.0488487	H_PPase|PF03030.16|7.2e-230	hydrogen-translocating pyrophosphatase activity	other localisation	Archaeplastida
EhG25886.4	0.294965	0.0101115	ERp29|PF07749.12|6.4e-20,ERp29_N|PF07912.13|4.3e-29	protein secretion	other localisation	Archaeplastida
EhG2648.2	0.226217	0.0278713	Ribonuc_L-PSP|PF01042.21|1.6e-18	endoribonuclease L-PSP	signal peptide	Archaeplastida
EhG26555.1	0.27709	0.02277	Helicase_C|PF00271.31|1.5e-29,DEAD|PF00270.29|3.5e-33	RNA helicase activity	other localisation	Archaeplastida
EhG26889.1	0.200019	0.0487854	NA	NA	signal peptide	Prymnesiales
EhG28103.2	0.397631	0.00775876	MAPEG|PF01124.18|8.3e-08	MAPEG family	other localisation	NA
EhG28170.2	0.746176	0.00440626	NA	NA	chloroplast	Prymnesiales
EhG28462.3	0.490295	0.0025964	NA	2-hydroxyglutarate dehydrogenase activity	signal peptide	Archaeplastida
EhG2901.4	0.207005	0.0275922	NA	NA	other localisation	Phaocystales
EhG29331.2	0.171649	0.0375314	SMC_N|PF02463.19|2.7e-35,SMC_hinge|PF06470.13|1.9e-23	sister chromatid cohesion	other localisation	Archaeplastida
EhG29642.2	0.347654	0.049212	NA	NA	signal peptide	Archaeplastida
EhG29841.1	0.42011	0.0147622	Sdh_cyt|PF01127.22|6.2e-18	succinate dehydrogenase activity	mitochondrion	Archaeplastida
EhG30321.3	0.323348	0.0281643	NA	NA	other localisation	Phaocystales
EhG30447.2	0.22218	0.0377491	NA	oxidation-reduction process	other localisation	Archaeplastida
EhG31766.1	0.267844	0.0206728	Thiolase_C|PF02803.18|3.8e-43,Thiolase_N|PF00108.23|6.3e-56	acetyl-CoA C-acyltransferase activity	mitochondrion	Archaeplastida
EhG31796.3	0.407398	0.00393197	NA	NA	signal peptide	NA
EhG31846.14	1.01827	0.000743797	Chloroa_b-bind|PF00504.21|2.1e-13	Chlorophyll A-B binding protein	other localisation	NA
EhG32824.1	0.325061	0.0370891	NA	NA	other localisation	Archaeplastida
EhG33087.5	0.745243	0.0493781	NA	NA	other localisation	E_huxleyi
EhG33117.24	0.293842	0.023322	Chloroa_b-bind|PF00504.21|3.5e-32	Chlorophyll A-B binding protein	signal peptide	SAR/Hapista
EhG33229.3	0.292168	0.0466857	Aminotran_1_2|PF00155.21|2.1e-15,Aminotran_1_2|PF00155.21|9.2e-27	transferase activity, transferring nitrogenous groups	other localisation	Archaeplastida
EhG35678.2	0.201693	0.0327747	NA	NA	other localisation	Gephyrocapsa
EhG36044.1	0.308095	0.0157956	NA	oxidation-reduction process	chloroplast	Archaeplastida
EhG36130.1	0.611312	0.0235722	Pro_isomerase|PF00160.21|1.7e-46	peptidyl-prolyl cis-trans isomerase activity	other localisation	Archaeplastida
EhG38460.1	0.68141	0.0275922	Aldo_ket_red|PF00248.21|1.5e-47	oxidoreductase activity	other localisation	Archaeplastida
EhG38844.1	0.374946	0.00294253	PEP_mutase|PF13714.6|6.5e-12,ICL|PF00463.21|5.5e-198	isocitrate lyase activity	other localisation	Archaeplastida
EhG39212.6	0.49594	0.0347565	Chloroa_b-bind|PF00504.21|3.9e-20	Chlorophyll A-B binding protein	chloroplast	SAR/Hapista
EhG40037.13	1.20123	0.000650481	Chloroa_b-bind|PF00504.21|4e-25	Chlorophyll A-B binding protein	chloroplast	SAR/Hapista
EhG40037.3	1.04346	0.00207099	Chloroa_b-bind|PF00504.21|3.7e-15	Chlorophyll A-B binding protein	chloroplast	E_huxleyi
EhG40761.15	0.649645	0.00235063	Chloroa_b-bind|PF00504.21|7.5e-26	Chlorophyll A-B binding protein	chloroplast	E_huxleyi
EhG41450.2	0.201453	0.0498121	NA	NA	other localisation	Hapista
EhG41864.2	0.225399	0.0389391	NA	NA	mitochondrion	Phaocystales
EhG43609.1	0.24993	0.0275922	GATase|PF00117.28|6.3e-36,tRNA_Me_trans|PF03054.16|8.9e-06,QueC|PF06508.13|0.00037,Peptidase_C26|PF07722.13|9.4e-15,NAD_synthase|PF02540.17|9.1e-07,GMP_synt_C|PF00958.22|0.00011,GMP_synt_C|PF00958.22|2.7e-13	GMP synthase (glutamine-hydrolyzing) activity	other localisation	Archaeplastida
EhG44491.1	0.279622	0.0459251	Kelch_5|PF13854.6|4.6e-07,Kelch_2|PF07646.15|0.00055,Kelch_4|PF13418.6|7.5e-06,Kelch_1|PF01344.25|6.6e-08,Kelch_6|PF13964.6|1.8e-08,Kelch_3|PF13415.6|3.3e-07,Kelch_3|PF13415.6|0.00042,Kelch_3|PF13415.6|4.9e-05	nitrile biosynthetic process	other localisation	Archaeplastida
EhG44537.1	0.292062	0.0121877	Aconitase|PF00330.20|9e-41,Aconitase_B_N|PF11791.8|2.4e-60,Aconitase_2_N|PF06434.13|2.2e-85	Aconitate B N-terminal domain	other localisation	Archaeplastida
EhG4781.2	0.235122	0.0247266	Sod_Fe_C|PF02777.18|1.7e-39,Sod_Fe_N|PF00081.22|9.8e-25	oxidoreductase activity, acting on superoxide radicals as acceptor	mitochondrion	Archaeplastida
EhG5974.2	1.24182	0.0199771	NA	NA	mitochondrion	Phaocystales
EhG6119.1	0.230407	0.0370855	ACAS_N|PF16177.5|5.4e-14,AMP-binding|PF00501.28|9.4e-89,AMP-binding_C|PF13193.6|3.2e-22	synthetase	other localisation	Archaeplastida
EhG6188.7	0.252879	0.0352959	NA	Chlorophyll A-B binding protein	other localisation	E_huxleyi
EhG6504.1	0.226223	0.0193233	Malate_synthase|PF01274.22|2.6e-137	Involved in the glycolate utilization. Catalyzes the condensation and subsequent hydrolysis of acetyl-coenzyme A (acetyl-CoA) and glyoxylate to form malate and CoA	mitochondrion	Archaeplastida
EhG6913.8	0.314887	0.0223104	Asp|PF00026.23|1.4e-110,TAXi_N|PF14543.6|1.1e-14,TAXi_C|PF14541.6|3.7e-05	aspartic-type endopeptidase activity	signal peptide	Archaeplastida
EhG7296.1	0.898727	0.0347565	ABC1|PF03109.16|6.8e-23,APH|PF01636.23|8e-06	Phosphotransferase enzyme family	signal peptide	Archaeplastida
EhG7880.3	0.181103	0.0466857	NA	Catalyzes the reversible oxidation of malate to oxaloacetate	mitochondrion	Archaeplastida
EhG7904.2	0.355846	0.0466857	NA	heat shock protein binding	other localisation	Prymnesiales
EhG8172.46	0.964622	0.0304199	HSP90|PF00183.18|5.3e-102,HSP90|PF00183.18|3.3e-94	unfolded protein binding	other localisation	Archaeplastida
EhG9045.1	0.33451	0.026309	NA	ZIP Zinc transporter	signal peptide	Archaeplastida
EhG9491.1	0.280961	0.0327747	WD40|PF00400.32|0.00013,PUL|PF08324.11|3.5e-34,WD40|PF00400.32|6.2e-05,WD40|PF00400.32|2.7e-07,WD40|PF00400.32|0.00014,PFU|PF09070.11|5.3e-34	phospholipase A2 activator activity	other localisation	Archaeplastida
EhUM1002	0.392048	0.0174636	None	Carrier of the growing fatty acid chain in fatty acid biosynthesis	other localisation	Archaeplastida
EhUM14529	0.857614	0.0375314	None	NA	other localisation	Haptophyta
EhUM1977	0.556933	0.0259483	None	COG4993 Glucose dehydrogenase	other localisation	SAR/Hapista
EhUM2430	0.270664	0.0382853	None	porin activity	other localisation	Archaeplastida
EhUM3810	0.38541	0.0097806	None	actin filament depolymerization	other localisation	Archaeplastida
EhUM5728	0.477677	0.0286756	None	F(1)F(0) ATP synthase produces ATP from ADP in the presence of a proton or sodium gradient. F-type ATPases consist of two structural domains, F(1) containing the extramembraneous catalytic core and F(0) containing the membrane proton channel, linked together by a central stalk and a peripheral stalk. During catalysis, ATP synthesis in the catalytic domain of F(1) is coupled via a rotary mechanism…	other localisation	Archaeplastida

## Sheet: StdCa down 6 h light
protein	log(2)FC	adj.P.Val	pfam terms	EggNog text	Localization	OG age
Br11831.t1	-0.461177	0.0109003	None	phosphopantetheine binding	other localisation	NA
Br12528.t1	-0.619268	0.0205965	None	NA	other localisation	Haptophyta
Br17455.t1	-0.366583	0.0422309	None	NA	other localisation	Gephyrocapsa
Br23753.t1	-0.362046	0.0390466	None	Belongs to the class I-like SAM-binding methyltransferase superfamily. RNA methyltransferase RlmE family. SPB1 subfamily	other localisation	Archaeplastida
Br2602.t1	-1.0492	0.00366197	None	structural constituent of ribosome	mitochondrion	Archaeplastida
Br31871.t1	-0.321927	0.0175301	None	dihydrokaempferol 4-reductase activity	other localisation	Archaeplastida
Br43084.t1	-0.369315	0.0466857	None	RNA binding	other localisation	Archaeplastida
Br43738.t1	-0.286317	0.049212	None	helicase activity	other localisation	Archaeplastida
Br45831.t1	-0.285644	0.0417824	None	Belongs to the eukaryotic ribosomal protein eS7 family	other localisation	Archaeplastida
Br48108.t1	-0.317567	0.0428324	None	Nitrite and sulphite reductase 4Fe-4S domain	mitochondrion	Archaeplastida
Br49732.t1	-0.270569	0.0493781	None	protein disulfide oxidoreductase activity	signal peptide	Archaeplastida
Br52395.t1	-0.472164	0.0102452	None	O-methyltransferase activity	other localisation	Archaeplastida
Br53113.t1	-0.440768	0.0102452	None	NA	mitochondrion	NA
Br7739.t1	-0.795285	0.0203324	None	NA	other localisation	Archaeplastida
Br8053.t1	-1.32623	0.00235063	None	protein heterodimerization activity	signal peptide	Archaeplastida
Br9581.t1	-0.323012	0.0389391	None	O-methyltransferase activity	other localisation	Archaeplastida
chloro|NC_007288.1_prot_YP_277313.1_5	-0.683047	0.000650481	NA	NA	NA	NA
chloro|NC_007288.1_prot_YP_277314.1_6	-0.788383	0.000801269	NA	NA	NA	NA
chloro|NC_007288.1_prot_YP_277315.1_7	-0.231628	0.0122538	NA	NA	NA	NA
chloro|NC_007288.1_prot_YP_277321.1_13	-0.759779	0.048458	NA	NA	NA	NA
chloro|NC_007288.1_prot_YP_277322.1_14	-0.281418	0.0084247	NA	NA	NA	NA
chloro|NC_007288.1_prot_YP_277327.1_19	-0.713054	0.0118615	NA	NA	NA	NA
chloro|NC_007288.1_prot_YP_277338.1_30	-0.325677	0.0347565	NA	NA	NA	NA
chloro|NC_007288.1_prot_YP_277339.1_31	-0.340186	0.0174636	NA	NA	NA	NA
chloro|NC_007288.1_prot_YP_277364.1_56	-0.328894	0.0137018	NA	NA	NA	NA
chloro|NC_007288.1_prot_YP_277365.2_57	-0.977031	0.0084247	NA	NA	NA	NA
chloro|NC_007288.1_prot_YP_277369.1_61	-0.311475	0.0203324	NA	NA	NA	NA
chloro|NC_007288.1_prot_YP_277376.1_68	-0.603906	0.00203192	NA	NA	NA	NA
chloro|NC_007288.1_prot_YP_277405.1_97	-0.432831	0.0297704	NA	NA	NA	NA
chloro|NC_007288.1_prot_YP_277414.1_106	-0.283952	0.0190237	NA	NA	NA	NA
chloro|NC_007288.1_prot_YP_277415.1_107	-0.312951	0.0113899	NA	NA	NA	NA
chloro|NC_007288.1_prot_YP_277421.1_113	-0.340603	0.0222907	NA	NA	NA	NA
EhG11026.1	-0.542548	0.0309866	Ribosomal_S8|PF00410.19|7e-20	structural constituent of ribosome	other localisation	Archaeplastida
EhG11276.3	-0.612115	0.000650481	Mito_carr|PF00153.27|2e-17,Mito_carr|PF00153.27|3.6e-17,Mito_carr|PF00153.27|1.8e-18	oxidative phosphorylation uncoupler activity	other localisation	Archaeplastida
EhG11701.1	-0.383683	0.0275922	Chloroa_b-bind|PF00504.21|2.4e-39	Chlorophyll A-B binding protein	mitochondrion	Archaeplastida
EhG11862.2	-0.552873	0.0275922	CLP_protease|PF00574.23|9.4e-76	serine-type endopeptidase activity	other localisation	Archaeplastida
EhG1219.1	-0.328103	0.0203324	PAP_fibrillin|PF04755.12|1.5e-09,PAP_fibrillin|PF04755.12|1.7e-16	PAP_fibrillin	signal peptide	Archaeplastida
EhG12227.1	-0.230494	0.0296021	WD40|PF00400.32|3.7e-05,WD40|PF00400.32|4.6e-05,WD40|PF00400.32|1e-07,WD40|PF00400.32|9.2e-06,WD40|PF00400.32|9.5e-08,WD40|PF00400.32|3.6e-06	positive regulation of Golgi to plasma membrane protein transport	other localisation	Archaeplastida
EhG12325.10	-0.640559	0.0149709	Ribosomal_L13e|PF01294.18|2.9e-71	structural constituent of ribosome	other localisation	Archaeplastida
EhG12372.10	-0.3911	0.0181278	Ribosomal_L5e|PF17144.4|4.1e-85,Ribosomal_L18_c|PF14204.6|3.9e-30	5S rRNA binding	other localisation	Archaeplastida
EhG12372.5	-0.215896	0.0327747	Ribosomal_L18_c|PF14204.6|2.3e-31,Ribosomal_L5e|PF17144.4|4.6e-85	5S rRNA binding	other localisation	Archaeplastida
EhG12730.3	-0.327585	0.0297179	Cyt-b5|PF00173.28|3.5e-22	heme binding	other localisation	Archaeplastida
EhG13052.1	-0.251768	0.0223104	NA	NA	chloroplast	Archaeplastida
EhG13295.2	-0.280207	0.0456526	NA	NA	other localisation	E_huxleyi
EhG13374.3	-0.429194	0.0112736	NA	protein serine/threonine kinase activity	other localisation	Archaeplastida
EhG13401.1	-1.74346	0.0101115	Ribosomal_60s|PF00428.19|2.8e-21	translational elongation	other localisation	Archaeplastida
EhG13953.3	-0.385054	0.0259038	Na_Ca_ex|PF01699.24|8.5e-27	calcium, potassium:sodium antiporter activity	signal anchor	Archaeplastida
EhG14038.4	-0.401324	0.036211	RRM_5|PF13893.6|8.4e-05,RRM_1|PF00076.22|1.9e-20	establishment of pole plasm mRNA localization	other localisation	Archaeplastida
EhG14038.68	-0.731735	0.0240421	Chloroa_b-bind|PF00504.21|1.1e-25	Chlorophyll A-B binding protein	other localisation	NA
EhG14096.1	-0.349276	0.0447606	Histone|PF00125.24|1.4e-19	protein heterodimerization activity	other localisation	Archaeplastida
EhG14269.3	-0.570926	0.0250783	KH_1|PF00013.29|1.8e-06	K homology RNA-binding domain	other localisation	Archaeplastida
EhG14688.2	-0.808813	0.000650481	NA	ribosomal protein	mitochondrion	Archaeplastida
EhG14787.1	-0.503718	0.0137555	Aminotran_5|PF00266.19|6.5e-39	DegT/DnrJ/EryC1/StrS aminotransferase family	other localisation	Archaeplastida
EhG14856.1	-0.298334	0.0204604	Pro_isomerase|PF00160.21|7.8e-46	peptidyl-prolyl cis-trans isomerase activity	other localisation	Archaeplastida
EhG15166.1	-0.536069	0.023559	DUF2237|PF09996.9|7.1e-17	NA	other localisation	SAR/Hapista
EhG15315.24	-0.267746	0.0275922	Gp_dh_C|PF02800.20|1.1e-61,Gp_dh_N|PF00044.24|1.2e-08	glyceraldehyde-3-phosphate dehydrogenase (NAD(P)+) (phosphorylating) activity	other localisation	Archaeplastida
EhG15873.1	-0.882807	0.0354999	DFRP_C|PF16543.5|4.6e-09	NA	other localisation	Archaeplastida
EhG16117.1	-0.609025	0.00151042	Fasciclin|PF02469.22|3e-15,Zip|PF02535.22|3e-17,Fasciclin|PF02469.22|6.3e-14	cellular zinc ion homeostasis	other localisation	Archaeplastida
EhG1631.5	-0.239403	0.0466857	DAO|PF01266.24|4.1e-37,DAO_C|PF16901.5|1.4e-37,FAD_binding_2|PF00890.24|1.3e-07,Pyr_redox_2|PF07992.14|0.00081	sn-glycerol-3-phosphate:ubiquinone-8 oxidoreductase activity	other localisation	Archaeplastida
EhG17522.2	-0.236087	0.041619	UCR_UQCRX_QCR9|PF05365.12|3e-20	NA	other localisation	Archaeplastida
EhG18036.1	-0.269173	0.0466857	NAD_Gly3P_dh_N|PF01210.23|6.8e-40,NAD_Gly3P_dh_C|PF07479.14|6.8e-46	glycerol-3-phosphate catabolic process	other localisation	Archaeplastida
EhG18201.4	-0.329429	0.0309866	Ribosomal_S6e|PF01092.19|1.4e-48	structural constituent of ribosome	other localisation	Archaeplastida
EhG18492.11	-0.743539	0.00520986	Ribosomal_L21e|PF01157.18|5.3e-37	structural constituent of ribosome	other localisation	Archaeplastida
EhG18606.7	-0.58662	0.0283058	Chloroa_b-bind|PF00504.21|4e-28	Chlorophyll A-B binding protein	other localisation	SAR/Hapista
EhG187.7	-0.534663	0.000650481	NAD_binding_1|PF00175.21|3.1e-28	NADPH-hemoprotein reductase activity	signal peptide	Archaeplastida
EhG18794.2	-0.286609	0.0149709	Mo-co_dimer|PF03404.16|1.9e-45,FAD_binding_6|PF00970.24|3e-25,NAD_binding_1|PF00175.21|3.5e-24,Oxidored_molyb|PF00174.19|8e-59,Cyt-b5|PF00173.28|2.2e-23	nitrate reductase	other localisation	Archaeplastida
EhG19027.1	-0.284462	0.0363746	DEAD|PF00270.29|4.4e-45,GUCT|PF08152.12|6.2e-07,Helicase_C|PF00271.31|2.1e-27	helicase activity	other localisation	Archaeplastida
EhG19271.7	-0.251074	0.0347565	B12-binding_2|PF02607.17|4.8e-23,S-methyl_trans|PF02574.16|1.2e-71,Met_synt_B12|PF02965.17|7.2e-116,B12-binding|PF02310.19|6.4e-16,Pterin_bind|PF00809.22|6.5e-46	betaine-homocysteine S-methyltransferase activity	other localisation	Archaeplastida
EhG19913.1	-0.246441	0.0261226	NA	3-isopropylmalate dehydrogenase activity	mitochondrion	Archaeplastida
EhG20013.1	-0.278291	0.0488487	Spermine_synth|PF01564.17|0.00025,Methyltransf_31|PF13847.6|1.8e-07,Methyltransf_11|PF08241.12|1.6e-15,CMAS|PF02353.20|2.1e-68,Methyltransf_25|PF13649.6|3.8e-13,MTS|PF05175.14|0.00028,Methyltransf_12|PF08242.12|4.3e-06,Methyltransf_23|PF13489.6|4e-11	sphingolipid metabolic process	other localisation	Archaeplastida
EhG20059.1	-0.399775	0.00633958	NDK|PF00334.19|1.9e-52	Nucleoside diphosphate kinase	other localisation	Archaeplastida
EhG20257.1	-0.219795	0.0425786	Transket_pyr|PF02779.24|6.4e-39,E1_dh|PF00676.20|2.9e-07,Transketolase_C|PF02780.20|0.00056,Transketolase_N|PF00456.21|4.9e-108	transketolase activity	signal peptide	Archaeplastida
EhG20346.1	-0.334407	0.0303398	RL10P_insert|PF17777.1|1.7e-24,Ribosomal_L10|PF00466.20|1.8e-17	ribosomal large subunit assembly	other localisation	Archaeplastida
EhG20352.1	-0.370352	0.049212	NDK|PF00334.19|1.3e-51	Nucleoside diphosphate kinase	signal peptide	Archaeplastida
EhG20801.2	-1.13215	0.0017551	RRM_1|PF00076.22|7.7e-17,RRM_1|PF00076.22|2.1e-15,RRM_1|PF00076.22|3.3e-15	rRNA processing	other localisation	Archaeplastida
EhG21070.4	-0.928161	0.0203324	Ribosomal_S14|PF00253.21|3e-12	40S ribosomal protein S29	other localisation	Archaeplastida
EhG2122.1	-0.421331	0.00294253	Ribosomal_S4e|PF00900.20|1.3e-32,KOW|PF00467.29|0.0001,RS4NT|PF08071.12|4.3e-21,40S_S4_C|PF16121.5|1.4e-24,S4|PF01479.25|3.3e-07	Belongs to the eukaryotic ribosomal protein eS4 family	other localisation	Archaeplastida
EhG21361.10	-0.243301	0.0286213	EF_TS|PF00889.19|3.2e-33	translation elongation factor activity	other localisation	Archaeplastida
EhG21445.7	-0.914495	0.0387078	NA	NA	signal peptide	Calcihaptophyta
EhG21562.1	-0.323096	0.0112736	MMR_HSR1|PF01926.23|2.7e-07,EFG_C|PF00679.24|4.3e-20,GTP_EFTU_D2|PF03144.25|0.00015,GTP_EFTU|PF00009.27|2.1e-49	GTPase activity	mitochondrion	Archaeplastida
EhG21673.1	-0.396564	0.0450317	NTP_transferase|PF00483.23|8e-09,NTP_transf_3|PF12804.7|9e-09,Hydrolase_3|PF08282.12|5.1e-05	NA	other localisation	Archaeplastida
EhG2170.2	-0.712872	0.0199771	Na_Ca_ex|PF01699.24|8.4e-17,Na_Ca_ex|PF01699.24|2.4e-17	calcium:proton antiporter activity	other localisation	Archaeplastida
EhG22071.4	-0.470446	0.00582704	NA	positive regulation of translational fidelity	other localisation	Archaeplastida
EhG2218.15	-0.611994	0.0169579	U-box|PF04564.15|6.6e-17	ubiquitin-protein transferase activity	other localisation	Archaeplastida
EhG22629.1	-0.336072	0.0191647	LSM|PF01423.22|1e-18	spliceosomal snRNP assembly	other localisation	Archaeplastida
EhG2270.5	-0.301256	0.0122798	NA	protein transport	other localisation	Archaeplastida
EhG22910.1	-0.284449	0.0354999	Chloroa_b-bind|PF00504.21|1.3e-31	Chlorophyll A-B binding protein	mitochondrion	Archaeplastida
EhG23702.91	-0.321858	0.013105	F_bP_aldolase|PF01116.20|1.4e-86	fructose-bisphosphate aldolase activity	other localisation	Archaeplastida
EhG23862.1	-0.334514	0.00366197	AAA_21|PF13304.6|2e-08,ABC_tran|PF00005.27|2.7e-17,ABC_tran|PF00005.27|5.1e-14,AAA_21|PF13304.6|0.00073	ATPase activity	other localisation	Archaeplastida
EhG24101.1	-0.207943	0.0439041	Fer2|PF00111.27|1.2e-09	2Fe-2S iron-sulfur cluster binding domain	chloroplast	Archaeplastida
EhG24270.1	-0.631406	0.00418592	TAF|PF02969.17|0.00023,CENP-S|PF15630.6|0.00014,Histone|PF00125.24|0.00086,CENP-T_C|PF15511.6|1.4e-08	protein heterodimerization activity	other localisation	Archaeplastida
EhG24289.1	-0.450507	0.0199771	PAF|PF15715.5|0.00028,Histone|PF00125.24|4.4e-54,CENP-S|PF15630.6|0.00055,CENP-T_C|PF15511.6|0.00022	protein heterodimerization activity	other localisation	Archaeplastida
EhG24590.2	-0.522057	0.0112736	NA	translation initiation factor activity	chloroplast	Archaeplastida
EhG24650.2	-1.02665	0.0329027	NA	NA	signal peptide	Prymnesiales
EhG24688.1	-0.26389	0.02277	NA	photosynthesis	signal peptide	SAR/Hapista
EhG25177.1	-0.314528	0.0112736	Ribosomal_S15|PF00312.22|2.8e-27	structural constituent of ribosome	signal peptide	Archaeplastida
EhG25188.1	-0.192467	0.0450317	Ubiquitin_2|PF14560.6|0.00014,UCH|PF00443.29|5.7e-51,USP7_ICP0_bdg|PF12436.8|5.9e-55,MATH|PF00917.26|1.7e-12,UCH_1|PF13423.6|9.3e-23,USP7_C2|PF14533.6|7.7e-49	ubiquitinyl hydrolase activity	other localisation	Archaeplastida
EhG25537.2	-0.531633	0.0275922	NA	nitrile biosynthetic process	other localisation	NA
EhG25779.2	-0.53113	0.0147029	Ribosomal_L2|PF00181.23|3.8e-15,Ribosomal_L2_C|PF03947.18|2.5e-43	structural constituent of ribosome	other localisation	Archaeplastida
EhG25947.1	-0.339074	0.0301278	Actin|PF00022.19|2.1e-148	cytoskeleton organization	other localisation	Archaeplastida
EhG2596.11	-0.420532	0.00410845	GTP_EFTU_D3|PF03143.17|1.2e-11,GTP_EFTU|PF00009.27|6.1e-43,GTP_EFTU_D2|PF03144.25|7.6e-08	regulation of response to stimulus	other localisation	Archaeplastida
EhG26540.34	-0.294466	0.0203324	ACC_central|PF08326.12|3.7e-52,Carboxyl_trans|PF01039.22|2.6e-143	acetyl-CoA carboxylase	other localisation	Archaeplastida
EhG26566.2	-0.566326	0.0462583	Aldedh|PF00171.22|1.7e-39,Aldedh|PF00171.22|9.2e-97	aldehyde dehydrogenase (NAD) activity	other localisation	Archaeplastida
EhG2661.3	-0.366074	0.0323322	Bax1-I|PF01027.20|3.9e-27	endoribonuclease inhibitor activity	mitochondrion	Archaeplastida
EhG26982.1	-0.45876	0.0309866	Chloroa_b-bind|PF00504.21|7.6e-38	Chlorophyll A-B binding protein	other localisation	Archaeplastida
EhG26984.1	-0.63557	0.00247891	NA	photosynthesis	mitochondrion	SAR/Hapista
EhG27313.6	-0.468988	0.00692946	ABC_tran|PF00005.27|9.7e-18,ABC_tran|PF00005.27|2.6e-21	protein kinase regulator activity	other localisation	Archaeplastida
EhG27610.1	-0.284778	0.0259483	NA	poly(U) RNA binding	other localisation	Archaeplastida
EhG27696.1	-0.29639	0.0488487	Aldedh|PF00171.22|5.1e-86	aldehyde dehydrogenase (NAD) activity	other localisation	Archaeplastida
EhG28024.1	-0.245589	0.0203324	AAA_lid_3|PF17862.1|2.3e-08,Peptidase_M41|PF01434.18|8e-53,AAA|PF00004.29|1.1e-41	metalloendopeptidase activity	signal peptide	Archaeplastida
EhG28742.2	-0.376289	0.0312646	NA	retrograde vesicle-mediated transport, Golgi to ER	other localisation	Archaeplastida
EhG28775.1	-0.55838	0.0347565	NA	NA	chloroplast	NA
EhG29006.1	-0.267477	0.0193233	FMN_dh|PF01070.18|5.5e-06,CBS|PF00571.28|2.7e-10,NMO|PF03060.15|9e-09,IMPDH|PF00478.25|2.8e-131	IMP dehydrogenase activity	other localisation	Archaeplastida
EhG29048.1	-0.472633	0.0286756	NA	The light-harvesting complex (LHC) functions as a light receptor, it captures and delivers excitation energy to photosystems with which it is closely associated	other localisation	Archaeplastida
EhG29838.2	-0.367694	0.0429334	Methyltransf_25|PF13649.6|6e-05,Spermine_synt_N|PF17284.2|1.4e-22,Spermine_synth|PF01564.17|3.5e-62	spermidine synthase activity	other localisation	Archaeplastida
EhG29888.1	-0.297828	0.0427364	Aldolase|PF01081.19|2.8e-29	KDPG and KHG aldolase	mitochondrion	Archaeplastida
EhG30106.4	-0.402192	0.0309866	Ribosomal_S17e|PF00833.18|0.00095,Ribosomal_S17e|PF00833.18|2.8e-51	ribosomal small subunit assembly	other localisation	Archaeplastida
EhG3042.1	-0.49265	0.0259483	Histone|PF00125.24|4.5e-13,Histone_H2A_C|PF16211.5|8.8e-20,CBFD_NFYB_HMF|PF00808.23|3.6e-05	Histone H2A	other localisation	Archaeplastida
EhG30566.1	-0.403621	0.0106684	Chloroa_b-bind|PF00504.21|3.6e-33	Chlorophyll A-B binding protein	mitochondrion	Archaeplastida
EhG30800.1	-0.353741	0.0476492	NA	NA	other localisation	SAR/Hapista
EhG30917.1	-0.566482	0.0309866	Ribosomal_L32e|PF01655.18|9.9e-51	60s ribosomal protein	other localisation	Archaeplastida
EhG31105.14	-0.404335	0.0259038	CA_like|PF10563.9|2.4e-50,CDCA|PF18484.1|7.6e-13	Cadmium carbonic anhydrase repeat	other localisation	Archaeplastida
EhG31109.3	-0.592419	0.0131508	LCIB_C_CA|PF18599.1|2.6e-62	NA	other localisation	Archaeplastida
EhG31129.2	-0.252941	0.0427364	NA	NA	mitochondrion	E_huxleyi
EhG31430.1	-0.54933	0.00388733	Ribosomal_L7Ae|PF01248.26|3.8e-20	maturation of LSU-rRNA	other localisation	Archaeplastida
EhG31467.4	-0.353286	0.0113899	Pyrophosphatase|PF00719.19|3.5e-44	inorganic diphosphatase activity	mitochondrion	Archaeplastida
EhG31490.1	-0.174469	0.0493781	HATPase_c|PF02518.26|1.9e-12,HATPase_c_3|PF13589.6|1.4e-09,HSP90|PF00183.18|7e-235	unfolded protein binding	other localisation	Archaeplastida
EhG31932.1	-0.236081	0.0317486	EMC1_C|PF07774.13|2.2e-55,PQQ_2|PF13360.6|2.1e-05,PQQ_2|PF13360.6|9.3e-06	protein folding in endoplasmic reticulum	signal peptide	Archaeplastida
EhG32082.2	-0.23563	0.0493781	AhpC-TSA|PF00578.21|1.4e-09,Redoxin|PF08534.10|2.1e-05	peroxiredoxin activity	signal peptide	Archaeplastida
EhG32708.1	-0.683059	0.00520986	Ribosomal_L1|PF00687.21|1.3e-42	maturation of LSU-rRNA	other localisation	Archaeplastida
EhG32733.1	-0.538678	0.0493781	NA	NA	other localisation	Prymnesiales
EhG33208.1	-1.12835	0.0281643	NA	NA	signal peptide	NA
EhG33358.3	-0.307974	0.0112736	EamA|PF00892.20|8.8e-08,EamA|PF00892.20|6.6e-07,TPT|PF03151.16|4.2e-87	carbohydrate transport	signal peptide	Archaeplastida
EhG33749.3	-0.618241	0.0112736	NA	structural constituent of ribosome	other localisation	Archaeplastida
EhG33791.2	-0.470548	0.0362395	Redoxin|PF08534.10|1.6e-07,AhpC-TSA|PF00578.21|1.5e-24	peroxiredoxin activity	mitochondrion	Archaeplastida
EhG33833.11	-1.99039	0.0137018	Chloroa_b-bind|PF00504.21|3.1e-29	Chlorophyll A-B binding protein	signal peptide	SAR/Hapista
EhG33983.1	-0.890207	0.00568425	NA	inorganic anion exchanger activity	other localisation	Archaeplastida
EhG34019.1	-0.426318	0.00711066	Ribosomal_L7Ae|PF01248.26|2.7e-28	structural constituent of ribosome	other localisation	Archaeplastida
EhG34276.2	-0.400121	0.0147187	Rubredoxin|PF00301.20|0.00011	NA	signal peptide	Archaeplastida
EhG34851.3	-0.31101	0.0204604	NA	Nascent polypeptide-associated complex subunit alpha-like protein	other localisation	Archaeplastida
EhG34936.2	-0.220801	0.0382853	Mito_carr|PF00153.27|3.8e-12,Mito_carr|PF00153.27|4.1e-15,Mito_carr|PF00153.27|2.8e-12	oxoglutarate:malate antiporter activity	other localisation	Archaeplastida
EhG35040.1	-0.535973	0.0223104	PP-binding|PF00550.25|2.5e-09,NAD_binding_7|PF13241.6|0.00047,DAO|PF01266.24|3.4e-05,FAD_binding_3|PF01494.19|0.00038,Meth_synt_2|PF01717.18|3.1e-07,HI0933_like|PF03486.14|6.6e-05,Thi4|PF01946.17|1.7e-05,FAD_binding_2|PF00890.24|1.6e-06,NAD_binding_8|PF13450.6|6.7e-08,Pyr_redox_2|PF07992.14|1.3e-05,FAD_oxidored|PF12831.7|3.4e-06,Pyr_redox_3|PF13738.6|0.00013	Methionine synthase	other localisation	SAR/Hapista
EhG35474.1	-0.527596	0.000650481	AdoHcyase_NAD|PF00670.21|4.7e-81,AdoHcyase|PF05221.17|1.8e-137,IlvN|PF07991.12|7.9e-05,2-Hacid_dh_C|PF02826.19|8.3e-08	adenosylhomocysteinase activity	other localisation	Archaeplastida
EhG35482.3	-0.203473	0.0206728	NAD_binding_1|PF00175.21|2.6e-26	NADPH-hemoprotein reductase activity	other localisation	Archaeplastida
EhG35650.1	-0.26892	0.0102452	MreB_Mbl|PF06723.13|1.4e-16,TPR_2|PF07719.17|8.7e-05,TPR_14|PF13428.6|0.00044,TPR_16|PF13432.6|9.9e-07,HSP70|PF00012.20|1.8e-203	ATP binding	other localisation	Archaeplastida
EhG3581.1	-0.770686	0.0466857	Pro_isomerase|PF00160.21|2.3e-33	peptidyl-prolyl cis-trans isomerase activity	other localisation	Archaeplastida
EhG35961.1	-0.178153	0.0474904	RRM_1|PF00076.22|0.00027,RRM_1|PF00076.22|1.6e-05,RRM_1|PF00076.22|9.3e-06	pre-mRNA 3'-splice site binding	other localisation	Archaeplastida
EhG35973.31	-0.29815	0.00651418	HSP70|PF00012.20|4.2e-104,HSP70|PF00012.20|1e-146,MreB_Mbl|PF06723.13|8.9e-07	ATP binding	other localisation	Archaeplastida
EhG36092.1	-0.193805	0.0318616	Cwf_Cwc_15|PF04889.12|0.00088,SART-1|PF03343.13|6.5e-08,SART-1|PF03343.13|1.2e-19	queuosine biosynthetic process	other localisation	Archaeplastida
EhG3616.3	-0.195844	0.0493781	DCP1|PF06058.13|5.6e-38	Dcp1-like decapping family	other localisation	Archaeplastida
EhG36177.10	-0.391135	0.0309866	Gln-synt_C|PF00120.24|3.1e-19,Gln-synt_N|PF03951.19|1.8e-07	glutamine biosynthetic process	signal peptide	Archaeplastida
EhG36775.2	-0.334676	0.0097806	RRM_3|PF08777.11|9.4e-08,La|PF05383.17|3.1e-21,DUF3223|PF11523.8|6.3e-19	nuclear histone mRNA catabolic process	other localisation	Archaeplastida
EhG36791.1	-0.44696	0.0102452	RRM_1|PF00076.22|3.9e-13	kDa ribonucleoprotein	other localisation	Archaeplastida
EhG36964.1	-0.511067	0.023559	SUI1|PF01253.22|5.4e-23	translation initiation factor activity	other localisation	Archaeplastida
EhG37462.4	-0.546854	0.0102452	Ribosomal_L16|PF00252.18|1.4e-35	structural constituent of ribosome	other localisation	Archaeplastida
EhG37728.1	-0.515312	0.0191647	RRM_1|PF00076.22|0.00051	pre-mRNA 3'-splice site binding	other localisation	Archaeplastida
EhG38026.1	-0.258343	0.0278713	NA	NA	signal peptide	Phaocystales
EhG38084.1	-0.240971	0.02277	NA	NA	other localisation	Phaocystales
EhG38215.10	-0.396994	0.0025964	S-AdoMet_synt_C|PF02773.16|1.4e-59,S-AdoMet_synt_N|PF00438.20|1.1e-35	methionine adenosyltransferase activity	other localisation	NA
EhG38215.43	-0.528995	0.00220128	S-AdoMet_synt_C|PF02773.16|1.3e-59,S-AdoMet_synt_M|PF02772.16|6.3e-07	methionine adenosyltransferase activity	other localisation	NA
EhG38656.3	-0.628576	0.0326873	NA	NA	other localisation	Calcihaptophyta
EhG38866.1	-1.12282	0.00538994	Histone|PF00125.24|2.4e-16,Histone_H2A_C|PF16211.5|1.8e-19,CBFD_NFYB_HMF|PF00808.23|7.5e-05	Histone H2A	other localisation	Archaeplastida
EhG38987.3	-0.258473	0.0312646	Pyr_redox_2|PF07992.14|7.8e-18,NAD_binding_9|PF13454.6|7.1e-05,FAD_binding_2|PF00890.24|0.00083,NAD_binding_8|PF13450.6|1.8e-07,Pyr_redox_3|PF13738.6|2.2e-17,Lycopene_cycl|PF05834.12|7.9e-05,FMO-like|PF00743.19|1.1e-35,Thi4|PF01946.17|0.00013,K_oxygenase|PF13434.6|1.3e-07,HI0933_like|PF03486.14|0.00044	N,N-dimethylaniline monooxygenase activity	other localisation	Archaeplastida
EhG39307.2	-0.388726	0.0334057	NA	NA	other localisation	NA
EhG39568.1	-0.406269	0.0296021	Ribosomal_S26e|PF01283.19|4.8e-44	structural constituent of ribosome	other localisation	Archaeplastida
EhG39756.4	-0.315961	0.023559	NA	NA	signal peptide	Archaeplastida
EhG39815.1	-0.443047	0.041619	SufE|PF02657.15|1.9e-34	Fe-S metabolism associated domain	signal peptide	Archaeplastida
EhG40126.15	-0.390445	0.041619	Na_Ca_ex|PF01699.24|7.8e-24,Na_Ca_ex|PF01699.24|2.4e-22	calcium, potassium:sodium antiporter activity	signal anchor	E_huxleyi
EhG40308.4	-0.238753	0.0259038	Ribosomal_L6|PF00347.23|8e-08,Ribosomal_L6|PF00347.23|8.3e-12	rRNA binding	other localisation	Archaeplastida
EhG40326.2	-0.444854	0.0347565	NA	Belongs to the universal ribosomal protein uL23 family	other localisation	Archaeplastida
EhG40703.2	-0.400888	0.0199771	Ribosomal_S17|PF00366.20|1.3e-20,Ribosomal_S17_N|PF16205.5|4.1e-29	rRNA binding	other localisation	Archaeplastida
EhG41179.1	-0.278973	0.0466857	NA	NA	signal peptide	Phaocystales
EhG41258.1	-1.22671	0.0080177	Glyco_transf_8|PF01501.20|2.7e-06	Glycosyl transferase family 8	other localisation	Archaeplastida
EhG41283.1	-0.28163	0.0297179	NA	RNA binding	other localisation	Archaeplastida
EhG42504.1	-0.394296	0.0263193	MMR_HSR1|PF01926.23|3.3e-07,GTP_EFTU|PF00009.27|2.8e-49,GTP_EFTU_D2|PF03144.25|0.00016,EFG_C|PF00679.24|4.5e-20	GTPase activity	signal peptide	Archaeplastida
EhG43016.9	-0.233866	0.0466857	CSD|PF00313.22|8.6e-26,OB_RNB|PF08206.11|0.00014,CSD|PF00313.22|1.5e-22	DNA binding	other localisation	Archaeplastida
EhG43225.5	-0.303356	0.037511	Ribosomal_S8e|PF01201.22|4.2e-56	structural constituent of ribosome	other localisation	Archaeplastida
EhG43312.10	-0.243341	0.0354999	Gp_dh_N|PF00044.24|1.6e-32,Gp_dh_C|PF02800.20|1.1e-43	Belongs to the glyceraldehyde-3-phosphate dehydrogenase family	other localisation	Archaeplastida
EhG43676.1	-0.208996	0.0275922	NA	S-adenosyl-L-methionine transmembrane transport	other localisation	Archaeplastida
EhG44284.10	-0.314969	0.0342585	S-AdoMet_synt_M|PF02772.16|2.8e-38,S-AdoMet_synt_C|PF02773.16|6.5e-15	methionine adenosyltransferase activity	other localisation	E_huxleyi
EhG4803.4	-0.502963	0.00238851	Histone|PF00125.24|2.9e-19,Histone_H2A_C|PF16211.5|8.5e-12	chromatin silencing	other localisation	Archaeplastida
EhG520.2	-0.169177	0.0493781	NAD_Gly3P_dh_C|PF07479.14|6.8e-46,NAD_Gly3P_dh_N|PF01210.23|5.6e-40	glycerol-3-phosphate catabolic process	other localisation	Archaeplastida
EhG5311.3	-0.242005	0.014077	NA	NA	other localisation	E_huxleyi
EhG5315.10	-0.717099	0.00404394	Chloroa_b-bind|PF00504.21|4.1e-23	Chlorophyll A-B binding protein	chloroplast	Phaocystales
EhG5665.34	-0.23671	0.0320925	ubiquitin|PF00240.23|8.8e-30,Thioredoxin_7|PF13899.6|6.4e-06,AhpC-TSA|PF00578.21|0.00036,Ubiquitin_2|PF14560.6|0.00088,Rad60-SLD|PF11976.8|4.3e-15,Thioredoxin|PF00085.20|1.2e-30,OST3_OST6|PF04756.13|2.4e-05,ubiquitin|PF00240.23|2.8e-33,Thioredoxin_2|PF13098.6|0.00034,Thioredoxin_8|PF13905.6|1.8e-05,Rad60-SLD|PF11976.8|6.3e-12,Thioredoxin_9|PF14595.6|1.1e-05	ubiquitin	other localisation	Archaeplastida
EhG5797.4	-0.351957	0.0275922	V-ATPase_G|PF03179.15|1.4e-14	proton transmembrane transport	other localisation	Archaeplastida
EhG5923.1	-0.623317	0.00224708	SNO|PF01174.19|1.8e-43,GATase_3|PF07685.14|5.2e-08,ThiG|PF05690.14|1.4e-05,SOR_SNZ|PF01680.17|2.7e-97,GATase|PF00117.28|0.00041	pyridoxal 5'-phosphate synthase (glutamine hydrolysing) activity	signal peptide	Archaeplastida
EhG6481.1	-0.260909	0.0175301	ATP-synt|PF00231.19|3.7e-88	proton-transporting ATP synthase activity, rotational mechanism	chloroplast	Archaeplastida
EhG6530.16	-0.233232	0.0217857	NA	translation elongation factor activity	signal peptide	Archaeplastida
EhG6639.4	-0.405256	0.0466857	Ribosomal_L3|PF00297.22|7.5e-181	Belongs to the universal ribosomal protein uL3 family	other localisation	Archaeplastida
EhG7109.5	-0.807581	0.0427364	ATPgrasp_Ter|PF15632.6|0.00012,GARS_A|PF01071.19|1.7e-06,ATP-grasp_3|PF02655.14|3.2e-10,ATP-grasp_4|PF13535.6|2e-11	ATP-grasp domain	other localisation	Archaeplastida
EhG718.1	-0.311861	0.00800362	Ribosomal_S9|PF00380.19|1.2e-32	structural constituent of ribosome	other localisation	Archaeplastida
EhG7211.1	-0.345306	0.0462243	NA	RNA binding	other localisation	Archaeplastida
EhG7591.1	-0.384423	0.00354319	NA	rRNA binding	other localisation	Archaeplastida
EhG7703.4	-0.255205	0.0256065	Enolase_C|PF00113.22|3.1e-127,MAAL_C|PF07476.11|3.7e-06,MR_MLE_C|PF13378.6|5.9e-08,Enolase_N|PF03952.16|3.7e-49	phosphopyruvate hydratase activity	other localisation	Archaeplastida
EhG8424.6	-0.344654	0.00850673	GTP_EFTU_D2|PF03144.25|1.1e-12,EFG_IV|PF03764.18|1.9e-31,EFG_II|PF14492.6|1.4e-13,EFG_C|PF00679.24|3.1e-18,GTP_EFTU|PF00009.27|4.1e-62,MMR_HSR1|PF01926.23|0.00017	translation elongation factor activity	other localisation	Archaeplastida
EhG8443.3	-1.0074	0.0281643	Rubredoxin|PF00301.20|9.8e-10	Rubredoxin	signal peptide	Archaeplastida
EhG8499.5	-0.732843	0.0217857	Ribosomal_L29|PF00831.23|1.6e-19	ribosomal protein	other localisation	Archaeplastida
EhG8519.28	-0.318103	0.00520986	PRK|PF00485.18|6.6e-57	UMP salvage	signal peptide	Archaeplastida
EhG8964.1	-0.401787	0.0179977	NA	amino acid	signal peptide	Haptophyta
EhG911.2	-0.313601	0.0275922	PUA_2|PF14306.6|8.6e-42,ATP-sulfurylase|PF01747.17|5.3e-64	sulfate adenylyltransferase (ATP) activity	signal peptide	Archaeplastida
EhG9331.1	-0.31123	0.0493781	DUF3712|PF12505.8|6.5e-05	NA	signal anchor	Isochrysidales
EhG9613.3	-0.304741	0.0101115	HpcH_HpaI|PF03328.14|4.1e-05,PK|PF00224.21|2.5e-136,PK_C|PF02887.16|1.2e-18	pyruvate kinase activity	other localisation	Archaeplastida
EhUM11395	-0.395196	0.0488487	None	IF-3 binds to the 30S ribosomal subunit and shifts the equilibrum between 70S ribosomes and their 50S and 30S subunits in favor of the free subunits, thus enhancing the availability of 30S subunits on which protein synthesis initiation begins	other localisation	Archaeplastida
EhUM11956	-2.10773	0.00651418	None	translational elongation	other localisation	Archaeplastida
EhUM12442	-0.358683	0.0375314	None	Belongs to the P(II) protein family	other localisation	Archaeplastida
EhUM14449	-0.470172	0.0332706	None	belongs to the aldehyde dehydrogenase family	other localisation	Hapista
EhUM15260	-0.269098	0.0401321	None	Methyl-accepting chemotaxis-like domains (chemotaxis sensory transducer).	signal peptide	SAR/Hapista
EhUM15296	-0.893687	0.0347565	None	The transhydrogenation between NADH and NADP is coupled to respiration and ATP hydrolysis and functions as a proton pump across the membrane	signal peptide	Archaeplastida
EhUM729	-0.550514	0.0357586	None	Helix-hairpin-helix DNA-binding motif class 1	other localisation	NA
EhUM7642	-0.828025	0.0405428	None	Belongs to the bacterial ribosomal protein bL28 family	no signal peptide or anchor	Archaeplastida
EhUM8426	-0.418454	0.036211	None	This protein binds to the 23S rRNA, and is important in its secondary structure. It is located near the subunit interface in the base of the L7 L12 stalk, and near the tRNA binding site of the peptidyltransferase center	other localisation	Archaeplastida
mit|NC_005332.1_prot_NP_957734.1_14	-0.275389	0.0179977	NA	NA	NA	NA

## Sheet: LowCa down 6 h light
protein	log(2)FC	adj.P.Val	pfam terms	EggNog text	Localization	OG age
Br11831.t1	-0.401132	0.0431199	None	phosphopantetheine binding	other localisation	NA
Br17455.t1	-0.41226	0.0377884	None	NA	other localisation	Gephyrocapsa
Br2602.t1	-0.774952	0.015983	None	structural constituent of ribosome	mitochondrion	Archaeplastida
Br2936.t1	-0.315041	0.0147946	None	NA	other localisation	Archaeplastida
Br53113.t1	-0.497493	0.0232398	None	NA	mitochondrion	NA
Br8053.t1	-1.31047	0.0297439	None	protein heterodimerization activity	signal peptide	Archaeplastida
Br9581.t1	-0.410072	0.0180076	None	O-methyltransferase activity	other localisation	Archaeplastida
EhG106.2	-0.350987	0.0354625	Sec5|PF15469.6|2e-10,Vps51|PF08700.11|8.2e-09,Dor1|PF04124.12|0.00026	endocytic recycling	other localisation	Archaeplastida
EhG11026.1	-0.378084	0.0450245	Ribosomal_S8|PF00410.19|7e-20	structural constituent of ribosome	other localisation	Archaeplastida
EhG11176.6	-0.306051	0.0354625	NA	NA	signal peptide	NA
EhG11276.3	-0.428461	0.00623684	Mito_carr|PF00153.27|2e-17,Mito_carr|PF00153.27|3.6e-17,Mito_carr|PF00153.27|1.8e-18	oxidative phosphorylation uncoupler activity	other localisation	Archaeplastida
EhG11701.1	-0.452694	0.0180076	Chloroa_b-bind|PF00504.21|2.4e-39	Chlorophyll A-B binding protein	mitochondrion	Archaeplastida
EhG12212.4	-0.346759	0.0276647	FoP_duplication|PF13865.6|8.6e-06	NA	other localisation	Phaocystales
EhG13401.1	-1.26417	0.0334462	Ribosomal_60s|PF00428.19|2.8e-21	translational elongation	other localisation	Archaeplastida
EhG14038.68	-0.648074	0.0431199	Chloroa_b-bind|PF00504.21|1.1e-25	Chlorophyll A-B binding protein	other localisation	NA
EhG15873.1	-1.10647	0.0431199	DFRP_C|PF16543.5|4.6e-09	NA	other localisation	Archaeplastida
EhG16117.1	-0.397199	0.0400414	Fasciclin|PF02469.22|3e-15,Zip|PF02535.22|3e-17,Fasciclin|PF02469.22|6.3e-14	cellular zinc ion homeostasis	other localisation	Archaeplastida
EhG18492.11	-0.721801	0.015983	Ribosomal_L21e|PF01157.18|5.3e-37	structural constituent of ribosome	other localisation	Archaeplastida
EhG187.7	-0.485396	0.0225763	NAD_binding_1|PF00175.21|3.1e-28	NADPH-hemoprotein reductase activity	signal peptide	Archaeplastida
EhG19010.1	-0.460467	0.0446357	Ribosomal_S30|PF04758.14|4.4e-30	structural constituent of ribosome	other localisation	Archaeplastida
EhG1936.2	-0.232418	0.0319488	MMR_HSR1|PF01926.23|2.3e-05,G-alpha|PF00503.20|3e-08,Arf|PF00025.21|1.2e-79,Gtr1_RagA|PF04670.12|4.3e-09,Ras|PF00071.22|2.3e-13,Roc|PF08477.13|2.5e-14,SRPRB|PF09439.10|8.4e-13	GTP binding	other localisation	Archaeplastida
EhG19803.3	-0.241784	0.0300545	RRM_1|PF00076.22|6.3e-18,RRM_1|PF00076.22|1e-18,RRM_1|PF00076.22|2.5e-18	RNA binding	other localisation	Archaeplastida
EhG20801.2	-1.14823	0.00237253	RRM_1|PF00076.22|7.7e-17,RRM_1|PF00076.22|2.1e-15,RRM_1|PF00076.22|3.3e-15	rRNA processing	other localisation	Archaeplastida
EhG21445.7	-0.635733	0.0133442	NA	NA	signal peptide	Calcihaptophyta
EhG21463.1	-0.516516	0.0298449	NA	NA	signal peptide	NA
EhG22535.1	-0.358668	0.00820774	PH|PF00169.29|3.3e-16	NA	other localisation	Archaeplastida
EhG22872.4	-1.0839	0.0446357	HMG_box|PF00505.19|3.5e-15,HMG_box_2|PF09011.10|1.5e-09	high mobility group	other localisation	Archaeplastida
EhG22910.1	-0.387135	0.0225763	Chloroa_b-bind|PF00504.21|1.3e-31	Chlorophyll A-B binding protein	mitochondrion	Archaeplastida
EhG23702.91	-0.213861	0.0400414	F_bP_aldolase|PF01116.20|1.4e-86	fructose-bisphosphate aldolase activity	other localisation	Archaeplastida
EhG23862.1	-0.336116	0.0298449	AAA_21|PF13304.6|2e-08,ABC_tran|PF00005.27|2.7e-17,ABC_tran|PF00005.27|5.1e-14,AAA_21|PF13304.6|0.00073	ATPase activity	other localisation	Archaeplastida
EhG24270.1	-0.689384	0.0319488	TAF|PF02969.17|0.00023,CENP-S|PF15630.6|0.00014,Histone|PF00125.24|0.00086,CENP-T_C|PF15511.6|1.4e-08	protein heterodimerization activity	other localisation	Archaeplastida
EhG24650.2	-0.637717	0.0377884	NA	NA	signal peptide	Prymnesiales
EhG24688.1	-0.336925	0.0318747	NA	photosynthesis	signal peptide	SAR/Hapista
EhG25537.2	-0.869969	0.0232398	NA	nitrile biosynthetic process	other localisation	NA
EhG26540.34	-0.338517	0.0477701	ACC_central|PF08326.12|3.7e-52,Carboxyl_trans|PF01039.22|2.6e-143	acetyl-CoA carboxylase	other localisation	Archaeplastida
EhG26984.1	-0.481829	0.0354625	NA	photosynthesis	mitochondrion	SAR/Hapista
EhG27313.6	-0.226837	0.0262783	ABC_tran|PF00005.27|9.7e-18,ABC_tran|PF00005.27|2.6e-21	protein kinase regulator activity	other localisation	Archaeplastida
EhG27610.1	-0.353228	0.032092	NA	poly(U) RNA binding	other localisation	Archaeplastida
EhG30295.1	-0.339622	0.0232398	ATP-synt_C|PF00137.21|3.7e-13,ATP-synt_C|PF00137.21|2.8e-19	ATP hydrolysis coupled proton transport	signal peptide	Archaeplastida
EhG3042.1	-0.464568	0.015983	Histone|PF00125.24|4.5e-13,Histone_H2A_C|PF16211.5|8.8e-20,CBFD_NFYB_HMF|PF00808.23|3.6e-05	Histone H2A	other localisation	Archaeplastida
EhG30705.2	-0.298153	0.0232398	DUF1118|PF06549.12|1.9e-05	NA	signal peptide	Phaocystales
EhG30829.2	-0.336965	0.0232398	ThylakoidFormat|PF11264.8|2.5e-24	May be involved in photosynthetic membrane biogenesis	signal peptide	Archaeplastida
EhG31109.3	-0.346051	0.0232398	LCIB_C_CA|PF18599.1|2.6e-62	NA	other localisation	Archaeplastida
EhG31129.2	-0.370554	0.0276984	NA	NA	mitochondrion	E_huxleyi
EhG3291.12	-0.476995	0.032092	CDCA|PF18484.1|7.6e-13,CA_like|PF10563.9|2.6e-50	Cadmium carbonic anhydrase repeat	other localisation	Archaeplastida
EhG33208.1	-1.8617	0.0147946	NA	NA	signal peptide	NA
EhG33749.3	-0.392478	0.0433874	NA	structural constituent of ribosome	other localisation	Archaeplastida
EhG34930.1	-0.219373	0.0450245	2-Hacid_dh|PF00389.30|6.9e-28,2-Hacid_dh_C|PF02826.19|1.5e-52	phosphoglycerate dehydrogenase activity	other localisation	Archaeplastida
EhG35973.31	-0.202927	0.0405663	HSP70|PF00012.20|4.2e-104,HSP70|PF00012.20|1e-146,MreB_Mbl|PF06723.13|8.9e-07	ATP binding	other localisation	Archaeplastida
EhG36775.2	-0.523712	0.00623684	RRM_3|PF08777.11|9.4e-08,La|PF05383.17|3.1e-21,DUF3223|PF11523.8|6.3e-19	nuclear histone mRNA catabolic process	other localisation	Archaeplastida
EhG37700.2	-0.344242	0.0471991	Chloroa_b-bind|PF00504.21|8.4e-31	Chlorophyll A-B binding protein	mitochondrion	Archaeplastida
EhG38026.1	-0.212577	0.0450245	NA	NA	signal peptide	Phaocystales
EhG38215.10	-0.353643	0.0116856	S-AdoMet_synt_C|PF02773.16|1.4e-59,S-AdoMet_synt_N|PF00438.20|1.1e-35	methionine adenosyltransferase activity	other localisation	NA
EhG38215.43	-0.255083	0.0334462	S-AdoMet_synt_C|PF02773.16|1.3e-59,S-AdoMet_synt_M|PF02772.16|6.3e-07	methionine adenosyltransferase activity	other localisation	NA
EhG38866.1	-1.0347	0.0116856	Histone|PF00125.24|2.4e-16,Histone_H2A_C|PF16211.5|1.8e-19,CBFD_NFYB_HMF|PF00808.23|7.5e-05	Histone H2A	other localisation	Archaeplastida
EhG38987.3	-0.317779	0.0180076	Pyr_redox_2|PF07992.14|7.8e-18,NAD_binding_9|PF13454.6|7.1e-05,FAD_binding_2|PF00890.24|0.00083,NAD_binding_8|PF13450.6|1.8e-07,Pyr_redox_3|PF13738.6|2.2e-17,Lycopene_cycl|PF05834.12|7.9e-05,FMO-like|PF00743.19|1.1e-35,Thi4|PF01946.17|0.00013,K_oxygenase|PF13434.6|1.3e-07,HI0933_like|PF03486.14|0.00044	N,N-dimethylaniline monooxygenase activity	other localisation	Archaeplastida
EhG39568.1	-0.274745	0.0334462	Ribosomal_S26e|PF01283.19|4.8e-44	structural constituent of ribosome	other localisation	Archaeplastida
EhG40126.15	-0.680439	0.00623684	Na_Ca_ex|PF01699.24|7.8e-24,Na_Ca_ex|PF01699.24|2.4e-22	calcium, potassium:sodium antiporter activity	signal anchor	E_huxleyi
EhG41258.1	-1.30404	0.0147946	Glyco_transf_8|PF01501.20|2.7e-06	Glycosyl transferase family 8	other localisation	Archaeplastida
EhG44305.1	-0.483419	0.0354625	NA	aldehyde dehydrogenase (NAD) activity	signal peptide	Archaeplastida
EhG4665.1	-0.375366	0.0334462	NA	NA	signal peptide	Isochrysidales
EhG4803.4	-0.509988	0.0232398	Histone|PF00125.24|2.9e-19,Histone_H2A_C|PF16211.5|8.5e-12	chromatin silencing	other localisation	Archaeplastida
EhG5665.34	-0.336431	0.0232398	ubiquitin|PF00240.23|8.8e-30,Thioredoxin_7|PF13899.6|6.4e-06,AhpC-TSA|PF00578.21|0.00036,Ubiquitin_2|PF14560.6|0.00088,Rad60-SLD|PF11976.8|4.3e-15,Thioredoxin|PF00085.20|1.2e-30,OST3_OST6|PF04756.13|2.4e-05,ubiquitin|PF00240.23|2.8e-33,Thioredoxin_2|PF13098.6|0.00034,Thioredoxin_8|PF13905.6|1.8e-05,Rad60-SLD|PF11976.8|6.3e-12,Thioredoxin_9|PF14595.6|1.1e-05	ubiquitin	other localisation	Archaeplastida
EhG6481.1	-0.264108	0.0339941	ATP-synt|PF00231.19|3.7e-88	proton-transporting ATP synthase activity, rotational mechanism	chloroplast	Archaeplastida
EhG7591.1	-0.36473	0.0298449	NA	rRNA binding	other localisation	Archaeplastida
EhG7886.1	-0.343277	0.0262783	Chloroa_b-bind|PF00504.21|6.3e-38	Chlorophyll A-B binding protein	other localisation	Archaeplastida
EhG834.2	-0.278661	0.0180076	Transket_pyr|PF02779.24|1.6e-47,Transketolase_C|PF02780.20|1.1e-41	pyruvate dehydrogenase (acetyl-transferring) activity	mitochondrion	Archaeplastida
EhG8435.1	-0.293806	0.0450245	NA	regulation of translation	other localisation	Archaeplastida
EhG8519.28	-0.27778	0.0180076	PRK|PF00485.18|6.6e-57	UMP salvage	signal peptide	Archaeplastida
EhG8964.1	-0.446579	0.0232398	NA	amino acid	signal peptide	Haptophyta
EhG9020.20	-0.818838	0.0225763	NA	NA	signal peptide	NA
EhG911.2	-0.302481	0.0147946	PUA_2|PF14306.6|8.6e-42,ATP-sulfurylase|PF01747.17|5.3e-64	sulfate adenylyltransferase (ATP) activity	signal peptide	Archaeplastida
EhG9934.3	-0.299574	0.0298449	Peptidase_S24|PF00717.23|2.5e-07	signal peptide processing	other localisation	Archaeplastida
EhUM12442	-0.373401	0.0413051	None	Belongs to the P(II) protein family	other localisation	Archaeplastida
EhUM14449	-0.489293	0.0469116	None	belongs to the aldehyde dehydrogenase family	other localisation	Hapista
EhUM149	-0.362926	0.0318747	None	This protein promotes the GTP-dependent binding of aminoacyl-tRNA to the A-site of ribosomes during protein biosynthesis	other localisation	Archaeplastida
EhUM15260	-0.370135	0.0180076	None	Methyl-accepting chemotaxis-like domains (chemotaxis sensory transducer).	signal peptide	SAR/Hapista
EhUM729	-1.12036	0.0063083	None	Helix-hairpin-helix DNA-binding motif class 1	other localisation	NA
EhUM765	-0.381953	0.0276984	None	Located at the top of the head of the 30S subunit, it contacts several helices of the 16S rRNA. In the 70S ribosome it contacts the 23S rRNA (bridge B1a) and protein L5 of the 50S subunit (bridge B1b), connecting the 2 subunits	other localisation	Archaeplastida
mit|NC_005332.1_prot_NP_957734.1_14	-0.244244	0.0298449	NA	NA	NA	NA

## Sheet: LowCa up 6 h light
protein	log(2)FC	adj.P.Val	pfam terms	EggNog text	Localization	OG age
Br48766.t1	0.526856	0.0397028	None	translation elongation factor activity	other localisation	Archaeplastida
Br49211.t1	0.38605	0.0147946	None	Nucleolar protein 6	other localisation	Archaeplastida
Br49867.t1	0.592728	0.0262783	None	structural constituent of cytoskeleton	mitochondrion	Archaeplastida
EhG11350.1	0.546282	0.0232398	Rtf2|PF04641.12|5.9e-06,Pro_isomerase|PF00160.21|4.6e-51	peptidyl-prolyl cis-trans isomerase activity	other localisation	Archaeplastida
EhG13227.2	0.724397	0.000351229	AAA_21|PF13304.6|0.00063,AAA_21|PF13304.6|4.9e-05,ABC_tran|PF00005.27|1.7e-13,ABC_tran|PF00005.27|4e-19	protein kinase regulator activity	other localisation	Archaeplastida
EhG14038.28	0.225756	0.0262783	Chloroa_b-bind|PF00504.21|2e-22	Chlorophyll A-B binding protein	other localisation	NA
EhG14216.8	0.551175	0.0232398	Chloroa_b-bind|PF00504.21|6.6e-24	Chlorophyll A-B binding protein	chloroplast	SAR/Hapista
EhG16682.7	0.493979	0.0298449	Chloroa_b-bind|PF00504.21|1.8e-28	Chlorophyll A-B binding protein	signal peptide	Archaeplastida
EhG17836.3	0.308508	0.0297439	E1_dh|PF00676.20|4.6e-83	alpha-ketoacid dehydrogenase activity	mitochondrion	Archaeplastida
EhG21930.1	0.292679	0.0407515	CRAL_TRIO|PF00650.20|7.2e-13	macromolecule localization	other localisation	Prymnesiales
EhG24079.1	0.409197	0.0431199	Tom22|PF04281.13|1.8e-06	NA	other localisation	Archaeplastida
EhG24742.3	0.528979	0.0297439	NA	NA	chloroplast	E_huxleyi
EhG25762.1	0.448485	0.0429453	Kringle|PF00051.18|1.1e-17,Kringle|PF00051.18|2.3e-20,Notch|PF00066.17|9.7e-06,Notch|PF00066.17|1.6e-07,Notch|PF00066.17|9.1e-07,Notch|PF00066.17|7.3e-07,Notch|PF00066.17|2.2e-06	transmembrane receptor protein tyrosine kinase activity	signal peptide	Archaeplastida
EhG26555.1	0.302408	0.0298449	Helicase_C|PF00271.31|1.5e-29,DEAD|PF00270.29|3.5e-33	RNA helicase activity	other localisation	Archaeplastida
EhG28170.2	0.568474	0.0147946	NA	NA	chloroplast	Prymnesiales
EhG28462.3	0.404633	0.00796972	NA	2-hydroxyglutarate dehydrogenase activity	signal peptide	Archaeplastida
EhG30321.3	0.341482	0.0180076	NA	NA	other localisation	Phaocystales
EhG31796.3	0.302936	0.0431199	NA	NA	signal peptide	NA
EhG31846.14	0.902097	0.0147946	Chloroa_b-bind|PF00504.21|2.1e-13	Chlorophyll A-B binding protein	other localisation	NA
EhG33117.24	0.353801	0.0232398	Chloroa_b-bind|PF00504.21|3.5e-32	Chlorophyll A-B binding protein	signal peptide	SAR/Hapista
EhG34489.4	0.317005	0.0298449	Fer2|PF00111.27|4.1e-19	2 iron, 2 sulfur cluster binding	other localisation	Archaeplastida
EhG36954.2	0.221032	0.0429453	Aminotran_1_2|PF00155.21|1.7e-10,DegT_DnrJ_EryC1|PF01041.17|3.9e-20,DegT_DnrJ_EryC1|PF01041.17|6.6e-30	Aminotransferase, DegT DnrJ EryC1 StrS family protein	signal peptide	Archaeplastida
EhG38844.1	0.272082	0.0225763	PEP_mutase|PF13714.6|6.5e-12,ICL|PF00463.21|5.5e-198	isocitrate lyase activity	other localisation	Archaeplastida
EhG39225.1	0.327724	0.0425285	NA	NA	other localisation	NA
EhG39686.6	0.311685	0.0298449	Chloroa_b-bind|PF00504.21|6.8e-34	Chlorophyll A-B binding protein	signal peptide	SAR/Hapista
EhG40008.22	0.425244	0.0262783	Chloroa_b-bind|PF00504.21|1.9e-33	Chlorophyll A-B binding protein	signal peptide	SAR/Hapista
EhG40037.13	0.971889	0.0063083	Chloroa_b-bind|PF00504.21|4e-25	Chlorophyll A-B binding protein	chloroplast	SAR/Hapista
EhG40037.3	0.898127	0.00623684	Chloroa_b-bind|PF00504.21|3.7e-15	Chlorophyll A-B binding protein	chloroplast	E_huxleyi
EhG40761.15	0.383767	0.0318747	Chloroa_b-bind|PF00504.21|7.5e-26	Chlorophyll A-B binding protein	chloroplast	E_huxleyi
EhG42232.1	0.288642	0.0496705	WW|PF00397.26|1.3e-11,WW|PF00397.26|4.9e-12	mRNA splicing, via spliceosome	other localisation	Archaeplastida
EhG44537.1	0.220329	0.0334462	Aconitase|PF00330.20|9e-41,Aconitase_B_N|PF11791.8|2.4e-60,Aconitase_2_N|PF06434.13|2.2e-85	Aconitate B N-terminal domain	other localisation	Archaeplastida
EhG44652.27	0.311632	0.015983	Chloroa_b-bind|PF00504.21|1.1e-34	Chlorophyll A-B binding protein	other localisation	Phaocystales
EhG4781.2	0.235035	0.0446357	Sod_Fe_C|PF02777.18|1.7e-39,Sod_Fe_N|PF00081.22|9.8e-25	oxidoreductase activity, acting on superoxide radicals as acceptor	mitochondrion	Archaeplastida
EhG6504.1	0.278499	0.0147946	Malate_synthase|PF01274.22|2.6e-137	Involved in the glycolate utilization. Catalyzes the condensation and subsequent hydrolysis of acetyl-coenzyme A (acetyl-CoA) and glyoxylate to form malate and CoA	mitochondrion	Archaeplastida
EhUM4660	0.415142	0.0294826	None	translational elongation	other localisation	Archaeplastida
EhUM6342	0.634579	0.0180076	None	NA	other localisation	NA

## Sheet: Legend
		protein
		log(2)FC	Log base 2 of fold change					up = upregulated 6h into the light phase relative to dawn
		adj.P.Val	LIMMA ajusted p-value					down = downregulated 6 h into the light phase relative to dawn
		pfam terms
		EggNog text	Free text from automatic EggNOG annotation
		Localization	Predicted by Hectare
		OG age	Age of the orthogroup this protein belongs to
