# Supplementary material for: A multifaceted proteomics strategy in combination with an updated proteome provides insights into the mechanism of calcification in coccolithophores
Source: Research Square preprint supplement (doi:10.21203/rs.3.rs-2039048/v1), 2022-09-15
Supplement: Supplementary file 4 [file a87f2df181957f702eb7f1f0.xlsx]

## Sheet: CvsN cells
ID	Annotation	Info	log(2)FC	adj.P.Val	Number of relicates C-cells	Number of replicates N-cells	Fold change	Locus	ORF_method	ORF_completeness	pfam_terms	EggNog_text	identical_JGIprots	JGI_annot	localization	orthogroup	OG_age	OG_notes
Br1062.t1	NA	NA	0.341848	0.00709952	2	2	1.26738	NA	Braker	NA	None	NA		none	other localisation	OG0007970	Haptophyta	NA
Br10986.t1	NA	NA	0.168868	0.0186676	3	3	1.12418	NA	Braker	NA	None	ATP-grasp domain	361940361941	none	other localisation	OG0000327	Archaeplastida	NA
Br1313.t1	NA	NA	0.51511	0.00142811	3	3	1.4291	NA	Braker	NA	None	vacuolar transport		none	other localisation	OG0002232	Archaeplastida	NA
Br13137.t1	NA	NA	0.206499	0.024833	3	3	1.15388	NA	Braker	NA	None	succinyltransferase component of 2-oxoglutarate dehydrogenase		none	mitochondrion	OG0002051	Archaeplastida	NA
Br14902.t1	NA	NA	0.456242	0.020357	2	2	1.37196	NA	Braker	NA	None	NA		none	mitochondrion	OG0023800	Phaocystales	NA
Br16530.t1	Zinc knuckle containing protein		0.941748	9.03143e-05	3	3	1.92085	NA	Braker	NA	None	NA		none	other localisation	OG0007114	SAR/Hapista	NA
Br17265.t1	Sec16 related protein	Vesicle coat protein, COPII binding, anterograde transport	0.636109	0.00505966	3	3	1.55413	NA	Braker	NA	None	NA		none	other localisation	OG0004523	Archaeplastida	NA
Br17455.t1	NA	NA	0.453244	0.000901036	3	3	1.36912	NA	Braker	NA	None	NA		none	other localisation	OG0041976	Gephyrocapsa	Coccolithophore specific in 2/6 species
Br17628.t1	NA	NA	0.412719	0.00366786	2	2	1.33119	NA	Braker	NA	None	NA		none	other localisation	OG0033452	Gephyrocapsa	Coccolithophore specific in 2/6 species
Br1778.t1	NA	NA	0.700212	0.000814024	3	3	1.62474	NA	Braker	NA	None	NA	104286121781	none	other localisation	OG0014544	Prymnesiales	NA
Br19123.t1	NA	NA	0.223263	0.0222333	3	3	1.16737	NA	Braker	NA	None	NA		none	other localisation	OG0007249	Phaocystales	NA
Br20934.t2	NA	NA	0.272588	0.00272158	3	3	1.20797	NA	Braker	NA	None	NA		none	chloroplast	OG0008326	E_huxleyi	NA
Br22153.t1	NA	NA	0.309221	0.0166199	2	2	1.23904	NA	Braker	NA	None	NA		none	other localisation	OG0007527	Archaeplastida	NA
Br22530.t1	NA	NA	0.13548	0.0287569	3	3	1.09846	NA	Braker	NA	None	response to arachidonic acid		none	other localisation	OG0001017	Archaeplastida	NA
Br22774.t1	NA	NA	0.232634	0.0129187	3	3	1.17498	NA	Braker	NA	None	ATP binding		none	other localisation	OG0000029	Archaeplastida	NA
Br26133.t1	NA	NA	0.284626	0.0104849	3	3	1.21809	NA	Braker	NA	None	NA	19967097565	none	other localisation	OG0033516	E_huxleyi	NA
Br26298.t1	NA	NA	0.556006	0.00259959	3	3	1.47019	NA	Braker	NA	None	dihydrolipoyllysine-residue succinyltransferase activity	99854	none	other localisation	OG0003919	Archaeplastida	NA
Br2936.t1	NA	NA	0.742831	4.81904e-05	3	3	1.67346	NA	Braker	NA	None	NA		none	other localisation	OG0000135	Archaeplastida	NA
Br33058.t1	NA	NA	0.301282	0.0195307	3	3	1.23224	NA	Braker	NA	None	NA		none	other localisation	OG0012394	Phaocystales	NA
Br33154.t1	NA	NA	0.512452	0.00249653	2	2	1.42647	NA	Braker	NA	None	copper ion binding		none	other localisation	OG0002122	Archaeplastida	NA
Br33256.t1	NA	NA	0.261733	0.0400141	3	3	1.19892	NA	Braker	NA	None	NA		none	other localisation	OG0012789	Phaocystales	NA
Br33451.t1	NA	NA	0.222786	0.0133406	3	3	1.16698	NA	Braker	NA	None	GTPase activity	363399	none	other localisation	OG0000071	Archaeplastida	NA
Br38429.t1	NA	NA	0.498916	0.00202434	2	2	1.41315	NA	Braker	NA	None	helicase activity	2.46139e+47	none	other localisation	OG0002746	Archaeplastida	NA
Br39226.t1	NA	NA	0.282303	0.035418	3	3	1.21613	NA	Braker	NA	None	NA		none	signal peptide	OG0000039	Archaeplastida	NA
Br40446.t1	NA	NA	0.409266	0.00283987	3	3	1.32801	NA	Braker	NA	None	muscle structure development		none	other localisation	OG0004346	Archaeplastida	NA
Br42325.t1	NA	NA	0.226272	0.0110335	3	3	1.16981	NA	Braker	NA	None	asparagine-tRNA ligase activity		none	other localisation	OG0000746	Archaeplastida	NA
Br42959.t1	NA	NA	0.400637	0.00794534	3	3	1.32009	NA	Braker	NA	None	NA		none	mitochondrion	OG0015396	Calcihaptophyta	NA
Br43738.t1	NA	NA	0.235804	0.00373294	3	3	1.17756	NA	Braker	NA	None	helicase activity		none	other localisation	OG0000012	Archaeplastida	NA
Br45171.t1	NA	NA	0.167293	0.0371828	3	3	1.12295	NA	Braker	NA	None	vesicle-mediated transport		none	other localisation	OG0001269	Archaeplastida	NA
Br46207.t1	NA	NA	0.449317	0.000291049	3	3	1.36539	NA	Braker	NA	None	NA		none	other localisation	NA	E_huxleyi	No Orthogroup
Br46747.t1	NA	NA	0.547884	0.000158552	3	3	1.46194	NA	Braker	NA	None	peroxiredoxin activity		none	other localisation	OG0000305	Archaeplastida	NA
Br49202.t1	NA	NA	0.238795	0.00394066	3	3	1.18001	NA	Braker	NA	None	clathrin-coated pit assembly		none	other localisation	OG0002164	Archaeplastida	NA
Br50102.t1	WW and SAP domain containing protein	SAP domain proteins often nuclear, various DNA and chromatin functions	0.617307	0.000121687	3	3	1.53401	NA	Braker	NA	None	RNA binding		none	other localisation	OG0000874	Archaeplastida	NA
Br50943.t1	NA	NA	2.81366	4.45389e-05	2	2	7.03066	NA	Braker	NA	None	NA	4.12451e+23	none	signal peptide	OG0085050	E_huxleyi	Coccolithophore specific in 1/6 species
Br51498.t1	NA	NA	0.623617	0.00104395	2	2	1.54073	NA	Braker	NA	None	NA	350269	none	other localisation	OG0023549	E_huxleyi	NA
Br51914.t1	NA	NA	0.213699	0.0326919	2	2	1.15966	NA	Braker	NA	None	mismatched DNA binding	463095947360048	none	other localisation	OG0000263	Archaeplastida	NA
Br52145.t1	NA	NA	0.319973	0.0134446	3	3	1.24831	NA	Braker	NA	None	nuclear pore complex assembly		none	other localisation	OG0007629	Archaeplastida	NA
Br5217.t1	Pyridine nucleotide-disulphide oxidoreductase	Likely glutathione or mucuric reductase	0.646485	0.0110698	2	2	1.56535	NA	Braker	NA	None	Oxidoreductase		none	signal peptide	OG0006261	SAR/Hapista	NA
Br53766.t1	NA	NA	0.345811	0.0188339	3	3	1.27086	NA	Braker	NA	None	oxoglutarate dehydrogenase (succinyl-transferring) activity		none	other localisation	OG0000950	Archaeplastida	NA
Br56200.t1	Nuf2 family	Mitotic spindle components	1.12989	4.45389e-05	3	3	2.18843	NA	Braker	NA	None	cell division		none	other localisation	OG0005335	Archaeplastida	NA
Br56417.t1	NA	NA	0.201807	0.0128469	3	3	1.15014	NA	Braker	NA	None	NA		none	other localisation	OG0042204	E_huxleyi	NA
Br56575.t1	NA	NA	0.239064	0.0219522	3	3	1.18023	NA	Braker	NA	None	ATP binding		none	other localisation	OG0003231	Archaeplastida	NA
Br6472.t1	NA	NA	0.246745	0.00776214	3	3	1.18653	NA	Braker	NA	None	NA		none	other localisation	OG0056052	Gephyrocapsa	Coccolithophore specific in 2/6 species
Br840.t1	NA	NA	0.75599	0.000641757	2	2	1.68879	NA	Braker	NA	None	NA		none	other localisation	OG0001572	Phaocystales	NA
Br8722.t1	NA	NA	0.247845	0.00546591	3	3	1.18743	NA	Braker	NA	None	NA		none	other localisation	OG0010511	Phaocystales	NA
Br8917.t1	NA	NA	0.565893	0.00615338	2	2	1.4803	NA	Braker	NA	None	RNA recognition motif	99014	none	other localisation	OG0002415	Archaeplastida	NA
Br9569.t1	NA	NA	0.515555	0.000382568	3	3	1.42954	NA	Braker	NA	None	Small nuclear ribonucleoprotein G. Source PGD		none	other localisation	OG0001447	Archaeplastida	NA
EhG10042.1	NA	NA	0.222448	0.0330794	2	2	1.16671	EhG42549,EhG42550	gmst	complete	Aldo_ket_red|PF00248.21|8.8e-67	oxidoreductase activity	4.32854e+41	none	signal peptide	OG0000495	Archaeplastida	NA
EhG1006.1	NA	NA	0.243036	0.0038414	3	3	1.18348	EhG35347	gmst	complete	NA	NA		none	chloroplast	OG0005351	Archaeplastida	NA
EhG10242.3	Alcohol dehydrogenase GroES-like protein		0.926472	4.81904e-05	3	3	1.90062	EhG21355	gmst	complete	ADH_zinc_N|PF00107.26|1.3e-07,AlaDh_PNT_C|PF01262.21|0.00051,ADH_N|PF08240.12|1.6e-21,2-Hacid_dh_C|PF02826.19|0.00029	sinapyl alcohol dehydrogenase activity		none	other localisation	OG0000958	Archaeplastida	NA
EhG10268.1	NA	NA	0.318596	0.0177634	2	2	1.24712	EhG21377	gmst	complete	Peptidase_S49|PF01343.18|3.5e-19	Peptidase family S49	2.73906e+41	none	signal peptide	OG0000621	Archaeplastida	NA
EhG10279.5	NA	NA	0.347264	0.00143991	3	3	1.27215	EhG40254	gmst	complete	Proteasome|PF00227.26|9.6e-32	threonine-type endopeptidase activity	8.76509e+62	none	other localisation	OG0002401	Archaeplastida	NA
EhG10302.16	Thioredoxin-like		0.784308	0.00012413	3	3	1.72227	EhG40228	gmst	complete	AhpC-TSA|PF00578.21|3e-08,Thioredoxin_8|PF13905.6|1.2e-26,Redoxin|PF08534.10|9.1e-07,Thioredoxin_8|PF13905.6|1e-12,Thioredoxin|PF00085.20|0.00025,Thioredoxin_2|PF13098.6|9.9e-07	cellular oxidant detoxification		none	other localisation	OG0000256	Archaeplastida	NA
EhG10343.1	Zinc-binding dehydrogenase	Possible alcohol dehydrogenase	0.83562	0.00045927	2	2	1.78462	EhG40816	gmst	complete	ADH_N|PF08240.12|6.9e-18,ADH_zinc_N|PF00107.26|7.2e-21	alcohol dehydrogenase (NAD) activity	1.9708e+92	none	mitochondrion	OG0000566	Archaeplastida	NA
EhG10419.1	NA	NA	0.209782	0.0139495	3	3	1.15651	EhG31723,EhG38028	gmst	complete	NA	NA	2.78392e+29	none	chloroplast	OG0004564	Haptophyta	NA
EhG10443.1	NA	NA	0.228731	0.0251921	2	2	1.1718	NA	gmst	complete	SBP_bac_3|PF00497.20|2.1e-14	Bacterial extracellular solute-binding proteins, family 3		none	mitochondrion	OG0007060	Archaeplastida	NA
EhG10464.21	NA	NA	0.270116	0.00182114	3	3	1.2059	EhG31681	gmst	complete	Tubulin_C|PF03953.17|9.9e-41,Tubulin|PF00091.25|7.8e-67,Misat_Tub_SegII|PF10644.9|9.2e-05	structural constituent of cytoskeleton	2.09491e+103	none	other localisation	OG0000098	Archaeplastida	NA
EhG10595.1	NA	NA	0.539347	0.00681004	3	3	1.45331	EhG37266	transdec	complete	NA	NA		none	other localisation	OG0008617	Archaeplastida	NA
EhG10672.1	NA	NA	0.350101	0.00378619	3	3	1.27465	EhG24228	getorf	complete	NA	regulation of ruffle assembly	2.82122e+65	none	other localisation	OG0000121	Archaeplastida	NA
EhG10712.2	NA	NA	0.351387	0.00797664	3	3	1.27579	EhG24194	gmst	complete	Complex1_LYR|PF05347.15|5.4e-06	Accessory subunit of the mitochondrial membrane respiratory chain NADH dehydrogenase (Complex I), that is believed to be not involved in catalysis. Complex I functions in the transfer of electrons from NADH to the respiratory chain. The immediate electron acceptor for the enzyme is believed to be ubiquinone		none	other localisation	OG0003277	Archaeplastida	NA
EhG10807.2	NA	NA	0.285652	0.0330263	3	3	1.21896	EhG37576,EhG42699,EhG42700	gmst	complete	GST_N_3|PF13417.6|3.7e-05,GST_C_2|PF13410.6|0.00037,GST_N|PF02798.20|8e-07,GST_C|PF00043.25|3.8e-09,GST_C_3|PF14497.6|2.3e-14	glutathione transferase activity		none	signal peptide	OG0000817	Archaeplastida	NA
EhG1104.1	NA	NA	0.573383	0.00122731	3	3	1.48801	EhG31959	gmst	complete	Fer2|PF00111.27|2e-09	Ferredoxins are iron-sulfur proteins that transfer electrons in a wide variety of metabolic reactions	5.98276e+29	none	signal peptide	OG0001189	Archaeplastida	NA
EhG11108.1	NA	NA	0.204479	0.0142806	3	3	1.15227	EhG4326	gmst	complete	Peptidase_A22B|PF04258.13|6.6e-79	Histocompatibility minor 13		none	signal anchor	OG0000507	Archaeplastida	NA
EhG1117.1	NA	NA	0.177952	0.0358497	3	3	1.13128	EhG31974	gmst	complete	NA	NA	NA	NA	signal peptide	OG0008245	Archaeplastida	NA
EhG11203.2	NA	NA	0.179287	0.016738	3	3	1.13232	EhG28137,EhG28138	gmst	complete	NA	negative regulation of lipoprotein oxidation	2.12344e+47	none	signal peptide	OG0003721	SAR/Hapista	NA
EhG11225.2	NA	NA	0.35294	0.000666593	3	3	1.27716	EhG28160	getorf	complete	NA	chaperone-mediated protein transport	4.94855e+59	none	other localisation	OG0004443	Archaeplastida	NA
EhG11342.1	NA	NA	0.386528	0.0127728	3	3	1.30724	EhG34476	gmst	complete	SnoaL_2|PF12680.7|0.00031	NA		none	mitochondrion	OG0002330	Archaeplastida	NA
EhG11354.1	NA	NA	0.544439	0.000572487	3	3	1.45845	EhG34486	gmst	complete	NA	NA	103800	none	signal peptide	OG0007929	Archaeplastida	NA
EhG11417.1	NA	NA	0.323201	0.0406487	3	3	1.2511	EhG34547	gmst	complete	EF-hand_1|PF00036.32|2.9e-06,EF-hand_1|PF00036.32|1e-06,EF-hand_5|PF13202.6|0.00036,EF-hand_8|PF13833.6|3.8e-09,EF-hand_7|PF13499.6|4.7e-10,EF-hand_6|PF13405.6|2.3e-06	pyrimidine nucleotide-sugar transmembrane transporter activity	2.0084e+17	none	other localisation	OG0013866	Archaeplastida	NA
EhG11570.10	NA	NA	0.285493	0.00246496	3	3	1.21883	EhG24008	gmst	complete	adh_short|PF00106.25|3.1e-56,adh_short_C2|PF13561.6|6.6e-57,KR|PF08659.10|1.7e-18	3-oxoacyl-[acyl-carrier-protein] reductase (NADH) activity	4.07337e+23	none	signal peptide	OG0000020	Archaeplastida	NA
EhG11574.2	NA	NA	0.171288	0.0138749	3	3	1.12606	EhG24003	gmst	complete	tRNA_anti-codon|PF01336.25|7e-06,tRNA-synt_2|PF00152.20|2.7e-75,WHEP-TRS|PF00458.20|7.8e-07	aspartyl-tRNA aminoacylation	8.72219e+32	none	other localisation	OG0000842	Archaeplastida	NA
EhG11615.1	NA	NA	0.376438	0.00181494	3	3	1.29813	EhG23961	gmst	complete	Glyco_hydro_32C|PF08244.12|6.1e-05,Glyco_hydro_32N|PF00251.20|1.1e-23	beta-fructofuranosidase activity		none	other localisation	OG0001913	Archaeplastida	NA
EhG11695.1	NA	NA	0.458241	0.000560293	3	3	1.37387	EhG39447	gmst	complete	14-3-3|PF00244.20|5.8e-93	protein domain specific binding		none	other localisation	OG0000216	Archaeplastida	NA
EhG11701.1	Chlorophyll A-B binding protein		0.614658	0.000336493	3	3	1.53119	EhG10819,EhG4627	gmst	complete	Chloroa_b-bind|PF00504.21|2.4e-39	Chlorophyll A-B binding protein		none	mitochondrion	OG0000105	Archaeplastida	NA
EhG1217.1	NA	NA	0.392452	0.0238278	2	2	1.31262	EhG18464	gmst	complete	NA	NA		none	other localisation	OG0009055	Phaocystales	NA
EhG12227.1	NA	NA	0.172557	0.0363308	3	3	1.12705	EhG11841	gmst	complete	WD40|PF00400.32|3.7e-05,WD40|PF00400.32|4.6e-05,WD40|PF00400.32|1e-07,WD40|PF00400.32|9.2e-06,WD40|PF00400.32|9.5e-08,WD40|PF00400.32|3.6e-06	positive regulation of Golgi to plasma membrane protein transport	4.36984e+71	Defline:Receptor of activated protein kinase C:Mark van der Giezen:2009-09-10	other localisation	OG0001237	Archaeplastida	NA
EhG12289.1	NA	NA	0.371576	0.028163	3	3	1.29377	EhG28410	gmst	complete	NA	pointed-end actin filament capping		none	other localisation	OG0005914	Archaeplastida	NA
EhG12371.2	NA	NA	0.201947	0.0138776	3	3	1.15025	EhG28484	getorf	complete	NA	glutathione-disulfide reductase activity		none	signal peptide	OG0000285	Archaeplastida	NA
EhG12448.1	NA	NA	0.336992	0.00687378	3	3	1.26312	EhG17837	getorf	complete	NA	NA	5953964042	none	other localisation	OG0002123	Hapista	NA
EhG12461.3	NA	NA	0.211818	0.020325	3	3	1.15815	EhG17853	gmst	complete	Skp1_POZ|PF03931.15|8.2e-24,Skp1|PF01466.19|1.7e-26	modification-dependent protein catabolic process		none	other localisation	OG0000571	Archaeplastida	NA
EhG12532.1	Electron transfer flavoprotein		0.688157	0.00148597	2	2	1.61122	EhG3508	getorf	complete	NA	fatty acid beta-oxidation using acyl-CoA dehydrogenase	2.82347e+47	none	other localisation	OG0002259	Archaeplastida	NA
EhG12559.2	Ethanolamine utilisation protein EutQ	Really Ehux? Acetate kinase activity. Ethanol amine from phosphatidylethanolamine – major component of eukaryotic membranes	0.755894	0.000177188	3	3	1.68868	EhG3535	gmst	complete	Cupin_2|PF07883.11|0.00074,EutQ|PF06249.12|5.7e-07,DUF952|PF06108.12|8.9e-11	NA	229897	none	other localisation	OG0001972	Archaeplastida	NA
EhG12620.2	NA	NA	0.364486	0.000699798	3	3	1.28742	EhG3596	gmst	complete	VDE|PF07137.11|3.8e-88	violaxanthin de-epoxidase activity		none	signal peptide	OG0002841	Archaeplastida	NA
EhG12638.1	NA	NA	0.269466	0.00840013	3	3	1.20536	EhG3609	gmst	5primepartial	SM-ATX|PF14438.6|0.00052,LSM|PF01423.22|2.3e-18	mRNA splicing, via spliceosome		none	other localisation	OG0001611	Archaeplastida	NA
EhG12768.2	NA	NA	0.206113	0.0264782	3	3	1.15358	EhG44394	gmst	complete	Mob1_phocein|PF03637.17|6.2e-49	hippo signaling		none	other localisation	OG0000863	Archaeplastida	NA
EhG12796.2	NA	NA	0.266453	0.00794534	3	3	1.20285	EhG35453	gmst	complete	NA	Catalyzes the transfer of a dimethylallyl group onto the adenine at position 37	224528281310	none	signal peptide	OG0001827	Archaeplastida	NA
EhG12875.1	NA	NA	0.329389	0.0297293	3	3	1.25648	EhG43957	gmst	complete	zf-RanBP|PF00641.18|0.00097,Ank_4|PF13637.6|0.00095,Ank_2|PF12796.7|9.3e-05,Myosin_head|PF00063.21|2.1e-188,Ank_5|PF13857.6|0.00093,Ank_2|PF12796.7|0.00058	translation initiation factor activity		none	other localisation	OG0007590	Haptophyta	NA
EhG12950.4	NA	NA	0.636578	0.000229975	3	3	1.55464	EhG37046	gmst	complete	NA	NA		none	chloroplast	OG0004397	SAR/Hapista	NA
EhG12953.1	NA	NA	0.193898	0.0165007	3	3	1.14385	EhG37048	gmst	5primepartial	tRNA-synt_1c_C|PF03950.18|5.1e-32,tRNA-synt_1c|PF00749.21|2.7e-92	glutaminyl-tRNA aminoacylation		none	other localisation	OG0000911	Archaeplastida	NA
EhG13115.1	NA	NA	0.211845	0.0351872	2	2	1.15817	EhG13114,EhG34970	gmst	complete	Thymidylate_kin|PF02223.17|1.5e-12	Thymidylate kinase		none	other localisation	OG0009438	Archaeplastida	NA
EhG13230.2	NA	NA	0.25975	0.00475068	3	3	1.19727	EhG26276	gmst	complete	NA	helicase activity	2.51505e+35	none	signal peptide	OG0005207	Archaeplastida	NA
EhG13289.1	NA	NA	0.191497	0.0113231	3	3	1.14195	EhG2353	gmst	complete	PALP|PF00291.25|3.1e-63	cysteine biosynthetic process from serine		none	other localisation	OG0000128	Archaeplastida	NA
EhG13362.1	NA	NA	0.296657	0.00223951	3	3	1.22829	EhG2283	gmst	complete	DUF836|PF05768.14|2.2e-13	oxidation-reduction process		none	mitochondrion	OG0007413	Archaeplastida	NA
EhG13461.1	NA	NA	0.557514	0.00615338	3	3	1.47173	EhG2175	gmst	complete	AAA_16|PF13191.6|0.00014,AAA|PF00004.29|5.8e-15,DNA_pol3_delta2|PF13177.6|1.8e-09,AAA_11|PF13086.6|0.00045,AAA_24|PF13479.6|0.00031,RuvB_N|PF05496.12|0.00077,Rad17|PF03215.15|1e-06,AAA_30|PF13604.6|0.00076,Rep_fac_C|PF08542.11|2.2e-13,AAA_5|PF07728.14|0.00031	DNA replication		none	other localisation	OG0000575	Archaeplastida	NA
EhG13464.1	Aminotransferase		0.64544	0.00016465	3	3	1.56422	EhG2171	getorf	complete	NA	O-phospho-L-serine:2-oxoglutarate aminotransferase activity		none	other localisation	OG0002535	Archaeplastida	NA
EhG13510.2	NA	NA	0.292635	0.00221502	3	3	1.22488	EhG2063	gmst	complete	M16C_assoc|PF08367.11|3e-55,Peptidase_M16|PF00675.20|1e-05,Peptidase_M16_C|PF05193.21|4e-23	metallopeptidase activity		none	chloroplast	OG0000605	Archaeplastida	NA
EhG13532.1	WW domain containing protein		0.654023	0.000983095	3	3	1.57355	EhG2082	gmst	complete	WW|PF00397.26|9.9e-11	NA		none	other localisation	OG0005145	SAR/Hapista	NA
EhG13614.5	NA	NA	0.402809	0.00250353	3	3	1.32208	EhG36888	gmst	complete	NA	NA		none	other localisation	OG0006427	Phaocystales	NA
EhG13647.1	NA	NA	0.4181	0.000496642	3	3	1.33617	EhG41479	gmst	complete	GrpE|PF01025.19|2.4e-35	adenyl-nucleotide exchange factor activity	4.50885e+44	none	signal peptide	OG0003335	Archaeplastida	NA
EhG13954.1	NA	NA	0.131839	0.0295923	3	3	1.09569	NA	gmst	complete	Seryl_tRNA_N|PF02403.22|1.7e-19,tRNA-synt_2b|PF00587.25|2.6e-35,Dpy-30|PF05186.13|1.5e-05	seryl-tRNA aminoacylation	354602	none	other localisation	OG0000859	Archaeplastida	NA
EhG14038.28	NA	NA	0.452	0.00443691	3	3	1.36793	EhG12801,EhG12846,EhG14041,EhG14048,EhG14113,EhG16686,EhG22924,EhG22926,EhG25090,EhG25091,EhG25421,EhG31343,EhG31344,EhG31365,EhG31828,EhG31829,EhG31846,EhG31868,EhG32569,EhG32570,EhG32885,EhG32922,EhG32923,EhG33915,EhG33916,EhG33917,EhG33919,EhG33920,EhG36769,EhG37221,EhG37222,EhG37420,EhG38850,EhG38872,EhG39190,EhG39191,EhG39193,EhG39383,EhG39384,EhG39386,EhG44043,EhG44044,EhG44045,EhG5777,EhG5…	gmst	5primepartial	Chloroa_b-bind|PF00504.21|2e-22	Chlorophyll A-B binding protein		none	other localisation	NA	E_huxleyi	No Orthogroup
EhG14038.33	Chlorophyll A-B binding protein		0.653947	0.000293463	3	3	1.57347	EhG12801,EhG12846,EhG14041,EhG14048,EhG14113,EhG16686,EhG22924,EhG22926,EhG25090,EhG25091,EhG25421,EhG31343,EhG31344,EhG31365,EhG31828,EhG31829,EhG31846,EhG31868,EhG32569,EhG32570,EhG32885,EhG32922,EhG32923,EhG33915,EhG33916,EhG33917,EhG33919,EhG33920,EhG36769,EhG37221,EhG37222,EhG37420,EhG38850,EhG38872,EhG39190,EhG39191,EhG39193,EhG39383,EhG39384,EhG39386,EhG44043,EhG44044,EhG44045,EhG5777,EhG5…	gmst	complete	Chloroa_b-bind|PF00504.21|2.3e-10	Chlorophyll A-B binding protein		none	other localisation	NA	E_huxleyi	No Orthogroup
EhG14044.1	NA	NA	0.296158	0.00318377	3	3	1.22787	EhG38867	gmst	complete	PDZ_6|PF17820.1|2.7e-10,PDZ|PF00595.24|4e-08,Peptidase_S41|PF03572.18|1.6e-38	tail specific protease		none	other localisation	OG0000545	Archaeplastida	NA
EhG14067.1	NA	NA	0.277975	0.00238659	3	3	1.21249	EhG38844	gmst	complete	PEP_mutase|PF13714.6|6.5e-12,ICL|PF00463.21|5.5e-198	isocitrate lyase activity	4.15467e+62	none	other localisation	OG0002409	Archaeplastida	NA
EhG14075.1	NA	NA	0.209712	0.011244	3	3	1.15646	EhG38832	gmst	complete	ATP-grasp_2|PF08442.10|6.2e-15,ATP-grasp_2|PF08442.10|7.6e-32,Ligase_CoA|PF00549.19|3.2e-21,ATP-grasp_5|PF13549.6|0.00059	succinate-CoA ligase (ADP-forming) activity		none	mitochondrion	OG0002066	Archaeplastida	NA
EhG14130.1	NA	NA	0.286686	0.0073907	3	3	1.21984	EhG31884	gmst	complete	Thi4|PF01946.17|1.7e-05,FAD_binding_2|PF00890.24|8.8e-06,Pyr_redox_3|PF13738.6|3.3e-12,GIDA|PF01134.22|0.0001,DAO|PF01266.24|1.6e-05,HI0933_like|PF03486.14|8.8e-05,Pyr_redox_2|PF07992.14|1.6e-36,FAD_oxidored|PF12831.7|1.2e-05,NAD_binding_8|PF13450.6|2.3e-05	thioredoxin-disulfide reductase activity		none	signal peptide	OG0000909	Archaeplastida	NA
EhG14165.1	NA	NA	0.266003	0.0325121	3	3	1.20247	EhG31914	gmst	complete	Histidinol_dh|PF00815.20|1.3e-124	histidinol dehydrogenase activity	2.03359e+82	none	other localisation	OG0001389	Archaeplastida	NA
EhG14216.8	NA	NA	0.529296	0.00259959	3	3	1.44322	EhG39212	gmst	complete	Chloroa_b-bind|PF00504.21|6.6e-24	Chlorophyll A-B binding protein	2.03284e+199	none	chloroplast	OG0000032	SAR/Hapista	NA
EhG14249.1	NA	NA	0.33912	0.00586949	3	3	1.26498	EhG43856	gmst	complete	DMRL_synthase|PF00885.19|1.7e-48	6,7-dimethyl-8-ribityllumazine synthase activity	2.03234e+164	none	signal peptide	OG0004122	Archaeplastida	NA
EhG14258.36	NA	NA	0.161756	0.0265127	3	3	1.11865	NA	getorf	complete	NA	unfolded protein binding	352848371791	none	signal peptide	OG0000939	Archaeplastida	NA
EhG14493.1	NA	NA	0.167199	0.020325	3	3	1.12288	EhG23422	getorf	complete	NA	thiosulfate transmembrane transporter activity	4.38514e+97	Defline:Mitochondrial carrier protein:Bryony Williams:2009-09-10	other localisation	OG0000143	Archaeplastida	NA
EhG14624.2	NA	NA	0.480599	0.000520685	3	3	1.39532	EhG27573	gmst	complete	FKBP_C|PF00254.28|2.2e-08	histone peptidyl-prolyl isomerization		none	signal peptide	OG0006658	Archaeplastida	NA
EhG14631.1	SNF7	membrane invagination	0.81152	0.000147482	3	3	1.75506	EhG27581	getorf	complete	NA	Snf7		none	other localisation	OG0001263	Archaeplastida	NA
EhG14691.1	NA	NA	0.20002	0.00711231	3	3	1.14871	EhG29576	getorf	complete	NA	ATP-dependent 5'-3' DNA helicase activity		none	other localisation	OG0003138	Archaeplastida	NA
EhG14723.3	NA	NA	0.236397	0.024985	3	3	1.17805	EhG29600	gmst	complete	Proteasome|PF00227.26|6.7e-28,Proteasome|PF00227.26|3.4e-05	threonine-type endopeptidase activity		none	other localisation	OG0002015	Archaeplastida	NA
EhG14773.1	NA	NA	0.514168	0.0252934	2	2	1.42817	EhG29654	gmst	complete	NA	NA		none	other localisation	OG0004393	Haptophyta	NA
EhG14992.4	NA	NA	0.255202	0.0038414	3	3	1.1935	EhG6240	gmst	complete	Mito_carr|PF00153.27|5.5e-08,Mito_carr|PF00153.27|9.1e-07	Mitochondrial carrier protein		none	other localisation	OG0000271	Archaeplastida	NA
EhG15164.1	NA	NA	0.210402	0.0248241	3	3	1.15701	EhG16413	gmst	complete	DnaJ_CXXCXGXG|PF00684.19|5.2e-08,DnaJ_C|PF01556.18|2.4e-30,DnaJ|PF00226.31|8.5e-20	heat shock protein binding		none	other localisation	OG0000284	Archaeplastida	NA
EhG15229.1	NA	NA	0.545212	0.000454857	3	3	1.45923	EhG41725	gmst	complete	NA	NA	1.98481e+28	none	signal peptide	OG0027554	Isochrysidales	NA
EhG1529.1	NA	NA	0.561617	0.000126691	3	3	1.47592	EhG29684	gmst	complete	CAP_N|PF01213.19|0.00011,STI1|PF17830.1|0.00018	NA	2.68189e+59	none	chloroplast	OG0005606	Archaeplastida	NA
EhG15410.1	NA	NA	0.418333	0.00505966	2	2	1.33638	EhG34711	gmst	complete	KH_1|PF00013.29|6.7e-06,SF1-HH|PF16275.5|6.6e-13	pre-mRNA branch point binding		none	other localisation	OG0000754	Archaeplastida	NA
EhG15478.1	NA	NA	0.180184	0.0167918	3	3	1.13303	EhG36129	gmst	complete	YbjQ_1|PF01906.17|1.4e-32	Belongs to the UPF0145 family	205477	Defline:hypothetical protein:Mark van der Giezen:2009-09-10	mitochondrion	OG0011369	Archaeplastida	NA
EhG15737.2	NA	NA	0.369162	0.019777	3	3	1.2916	EhG1399	gmst	complete	2-oxoacid_dh|PF00198.23|4e-78,E3_binding|PF02817.17|1.7e-11,Biotin_lipoyl|PF00364.22|3e-18	Dihydrolipoamide acetyltransferase component of pyruvate dehydrogenase complex	2.77157e+74	none	mitochondrion	OG0002904	Archaeplastida	NA
EhG15873.1	NA	NA	0.183946	0.0175036	3	3	1.13599	EhG23603	gmst	complete	DFRP_C|PF16543.5|4.6e-09	NA		none	other localisation	OG0001005	Archaeplastida	NA
EhG15990.10	NA	NA	0.129301	0.0408528	3	3	1.09376	EhG23477	gmst	complete	Chloroa_b-bind|PF00504.21|8.9e-16	Chlorophyll A-B binding protein		none	other localisation	OG0000032	SAR/Hapista	NA
EhG16022.1	NA	NA	0.262685	0.00895378	3	3	1.19971	NA	gmst	complete	Pro_isomerase|PF00160.21|3.3e-30	peptidyl-prolyl cis-trans isomerase activity		none	signal peptide	OG0000022	Archaeplastida	NA
EhG16179.1	NA	NA	0.464221	0.0140483	3	3	1.37957	EhG40172	gmst	complete	NA	NA	3.49876e+29	none	other localisation	OG0002816	Phaocystales	NA
EhG16305.1	NA	NA	0.428463	0.00375609	3	3	1.3458	EhG15059	getorf	complete	NA	NA		none	other localisation	OG0004549	Archaeplastida	NA
EhG16366.1	Fructose-bisphosphate aldolase class-I		1.97921	0.000180548	3	3	3.94276	EhG15116	gmst	complete	Glycolytic|PF00274.19|9.5e-153	fructose-bisphosphate aldolase		none	mitochondrion	OG0000277	Archaeplastida	NA
EhG16477.2	NA	NA	0.427051	0.000442667	3	3	1.34448	EhG18892	getorf	complete	NA	ATPase activity	8986989870	none	signal peptide	OG0006564	Archaeplastida	NA
EhG16604.2	NA	NA	0.207269	0.0426178	3	3	1.1545	EhG19003	gmst	complete	Hexapep|PF00132.24|7.5e-05	carbonate dehydratase activity		none	other localisation	OG0000492	Archaeplastida	NA
EhG16641.1	NA	NA	0.348156	0.00384935	3	3	1.27293	EhG19045	getorf	complete	NA	NA	197020275676	none	signal peptide	OG0027297	E_huxleyi	NA
EhG16648.1	NA	NA	0.424591	0.000606721	3	3	1.34219	EhG19051	getorf	complete	NA	NA		none	signal peptide	OG0016836	Calcihaptophyta	NA
EhG16741.7	NA	NA	0.170869	0.0171269	3	3	1.12574	EhG39442	gmst	complete	Pkinase|PF00069.25|2.8e-15,Pkinase_Tyr|PF07714.17|7.2e-16,Pkinase|PF00069.25|4e-29	protein serine/threonine kinase activity	4774872619373500	none	other localisation	OG0000280	Archaeplastida	NA
EhG16752.2	NA	NA	0.270027	0.0457121	2	2	1.20583	EhG22498	gmst	complete	NA	NA	211661232796	none	signal peptide	OG0000455	Archaeplastida	NA
EhG16814.2	NA	NA	0.215561	0.01966	3	3	1.16115	EhG22439	gmst	complete	Chloroa_b-bind|PF00504.21|1.8e-28	Chlorophyll A-B binding protein		none	other localisation	OG0000018	Archaeplastida	NA
EhG16860.5	NA	NA	0.365662	0.0147519	3	3	1.28847	EhG22391	gmst	complete	UbiA|PF01040.18|4.6e-16,UbiA|PF01040.18|1.1e-10	chlorophyll synthetase activity		none	signal peptide	OG0003854	Archaeplastida	NA
EhG16984.6	NA	NA	0.520512	0.000389156	3	3	1.43446	NA	gmst	complete	NA	NA		none	other localisation	OG0001555	Archaeplastida	NA
EhG17032.1	NA	NA	0.162519	0.0166898	3	3	1.11924	NA	gmst	complete	DJ-1_PfpI|PF01965.24|9.4e-18,ThiJ_like|PF17124.5|0.00011	glyoxalase III activity	4.54695e+125	none	other localisation	OG0002962	Archaeplastida	NA
EhG17045.1	NA	NA	0.439694	0.0121018	3	3	1.35632	EhG17046	transdec	5prime_partial	LSM|PF01423.22|5.9e-22	nuclear-transcribed mRNA catabolic process		none	other localisation	OG0004468	Archaeplastida	NA
EhG17140.1	NA	NA	0.445227	0.00215043	3	3	1.36153	EhG13685	gmst	5primepartial	NA	NA		none	signal peptide	OG0009483	Phaocystales	NA
EhG17164.2	NA	NA	0.364398	0.00551812	3	3	1.28734	EhG13715	getorf	complete	NA	NA		none	signal peptide	OG0007609	Archaeplastida	NA
EhG17312.2	NA	NA	0.189292	0.0194662	3	3	1.1402	EhG38295	gmst	complete	FKBP_C|PF00254.28|1.5e-22	Peptidyl-prolyl cis-trans isomerase	4.89725e+39	none	signal peptide	OG0001936	Archaeplastida	NA
EhG17313.1	NA	NA	0.390717	0.00460663	2	2	1.31104	EhG38294	gmst	complete	NA	NA	404902355053	none	other localisation	OG0015714	Gephyrocapsa	Coccolithophore specific in 2/6 species
EhG17340.2	NA	NA	0.211504	0.026264	3	3	1.15789	EhG38268	gmst	complete	NA	NA	355037	none	other localisation	OG0006982	Archaeplastida	NA
EhG17477.1	NA	NA	0.490995	0.00221502	3	3	1.40541	EhG22327	gmst	complete	Acyl-CoA_dh_M|PF02770.19|5.1e-07	NA		none	mitochondrion	OG0002246	Archaeplastida	NA
EhG17503.6	NA	NA	0.586002	0.000291049	3	3	1.50108	NA	getorf	complete	NA	NA		none	signal peptide	OG0012637	SAR/Hapista	NA
EhG17612.6	Chlorophyll A-B binding protein		1.22278	0.000126691	3	3	2.33396	EhG6894	getorf	complete	NA	Chlorophyll A-B binding protein	2.16458e+80	none	other localisation	OG0000105	Archaeplastida	NA
EhG17626.1	NA	NA	0.310714	0.00757449	3	3	1.24032	EhG6913	gmst	complete	TAXi_C|PF14541.6|3.7e-05,Asp|PF00026.23|5.4e-110,TAXi_N|PF14543.6|1.1e-14	aspartic-type endopeptidase activity		none	signal peptide	OG0000122	Archaeplastida	NA
EhG17684.1	NA	NA	0.154529	0.0295169	3	3	1.11306	EhG6968	gmst	complete	C2|PF00168.30|3.7e-06	NA	283619283620	none	other localisation	OG0002531	SAR/Hapista	NA
EhG17729.3	NA	NA	0.177278	0.0165425	3	3	1.13075	EhG13520,EhG14290,EhG29009,EhG33611,EhG40852,EhG41021,EhG43548,EhG7008	gmst	complete	PCI|PF01399.27|2.7e-12	translation initiation factor activity		none	other localisation	OG0002334	Archaeplastida	NA
EhG17864.1	NA	NA	0.497857	0.00124182	3	3	1.41211	EhG12471,EhG32310	gmst	complete	Tubulin|PF00091.25|3.8e-65,Tubulin_C|PF03953.17|2.4e-46	structural constituent of cytoskeleton		none	other localisation	OG0000102	Archaeplastida	NA
EhG17969.1	NA	NA	0.338173	0.00192565	3	3	1.26415	EhG451	gmst	complete	Pro_isomerase|PF00160.21|3.1e-44	peptidyl-prolyl cis-trans isomerase activity	2.75946e+50	none	signal peptide	OG0001006	Archaeplastida	NA
EhG17985.1	NA	NA	0.128431	0.0417322	3	3	1.0931	NA	getorf	complete	NA	pyruvate carboxylase activity	275937	none	mitochondrion	OG0000172	Archaeplastida	NA
EhG1814.11	NA	NA	0.423839	0.000549021	3	3	1.34149	EhG19263	getorf	complete	NA	Cobalamin synthesis protein cobW C-terminal domain		none	other localisation	OG0000029	Archaeplastida	NA
EhG18196.1	NA	NA	0.248682	0.0166898	3	3	1.18812	EhG26760	gmst	5primepartial	Cmc1|PF08583.10|0.00061,Ndufs5|PF10200.9|9.9e-06	NADH dehydrogenase ubiquinone iron-sulfur protein		none	other localisation	OG0006122	Archaeplastida	NA
EhG18373.1	NA	NA	0.385747	0.000582171	3	3	1.30654	EhG1294	gmst	complete	NA	NA		none	mitochondrion	OG0014618	Phaocystales	NA
EhG18516.2	NA	NA	0.37305	0.00856611	2	2	1.29509	EhG23818,EhG23819	gmst	complete	NA	interleukin-8 biosynthetic process	230920	none	signal peptide	OG0026786	Calcihaptophyta	Coccolithophore specific in 3/6 species
EhG1853.1	NA	NA	0.181951	0.0156451	3	3	1.13442	EhG19280	gmst	complete	SRP_TPR_like|PF17004.5|4.1e-10,SRP72|PF08492.12|4.9e-12	7S RNA binding	101462	none	other localisation	OG0002282	Archaeplastida	NA
EhG18732.1	NA	NA	0.306164	0.0411434	3	3	1.23642	EhG1934	gmst	complete	NA	NA	114559	none	signal peptide	OG0008240	Archaeplastida	NA
EhG18846.3	NA	NA	0.307839	0.00337166	3	3	1.23785	EhG2146	gmst	complete	NA	NA	255426	none	signal peptide	OG0006696	Haptophyta	NA
EhG18858.7	NA	NA	0.239523	0.00460649	3	3	1.1806	EhG2133	gmst	complete	NA	NA		none	signal peptide	OG0011200	E_huxleyi	NA
EhG18862.1	NA	NA	0.445034	0.000584557	3	3	1.36135	EhG2127	gmst	complete	ASL_C|PF08328.11|4.4e-50,Lyase_1|PF00206.20|8.9e-57	Belongs to the lyase 1 family. Adenylosuccinate lyase subfamily		none	other localisation	OG0003615	Archaeplastida	NA
EhG19225.2	NA	NA	0.271781	0.0384595	2	2	1.2073	EhG37560,EhG37561	gmst	complete	NA	NA	2.28265e+83	none	signal peptide	OG0023370	Prymnesiales	NA
EhG19240.1	NA	NA	0.371717	0.00748736	2	2	1.29389	EhG1799	gmst	complete	NA	NA	2.78041e+53	none	other localisation	OG0011982	E_huxleyi	NA
EhG19439.2	NA	NA	0.18298	0.0118792	3	3	1.13523	EhG25367	gmst	complete	SMN|PF06003.12|0.00028,TUDOR|PF00567.24|2.2e-08	RNA splicing	2.30228e+53	none	other localisation	OG0003747	Archaeplastida	NA
EhG19449.1	NA	NA	0.249224	0.016738	3	3	1.18857	EhG25376	gmst	complete	Profilin|PF00235.19|1.3e-39	sequestering of actin monomers	2.30242e+53	Name:PRO:Mary E. Marsh:2008-10-24 Description:Binds actin monomers	other localisation	OG0001539	Archaeplastida	NA
EhG19510.1	NA	NA	0.188152	0.0189729	3	3	1.1393	EhG20100	gmst	complete	Aminotran_4|PF01063.19|6.2e-29	branched-chain-amino-acid transaminase activity		none	mitochondrion	OG0000637	Archaeplastida	NA
EhG19803.3	NA	NA	0.181766	0.0423696	3	3	1.13427	EhG2677	gmst	complete	RRM_1|PF00076.22|6.3e-18,RRM_1|PF00076.22|1e-18,RRM_1|PF00076.22|2.5e-18	RNA binding	8.67959e+20	none	other localisation	OG0000450	Archaeplastida	NA
EhG19811.1	NA	NA	0.523984	0.00022185	3	3	1.43792	EhG2668	gmst	complete	GramPos_pilinD1|PF16555.5|0.00035	NA	2.01465e+22	none	other localisation	OG0001677	Archaeplastida	NA
EhG20011.1	EF-hand containing protein		0.59876	0.00329005	3	3	1.51441	EhG19599	gmst	complete	EF-hand_5|PF13202.6|1e-06,EF-hand_6|PF13405.6|4.3e-09,EF-hand_6|PF13405.6|1.4e-09,EF-hand_5|PF13202.6|0.0007,EF-hand_5|PF13202.6|2.6e-06,EF-hand_8|PF13833.6|4.2e-06,EF-hand_9|PF14658.6|1.7e-09,EF-hand_1|PF00036.32|5.4e-10,EF-hand_7|PF13499.6|1.2e-15,EF-hand_1|PF00036.32|8.2e-09,EF-hand_1|PF00036.32|1.3e-09,EF-hand_7|PF13499.6|5.2e-09,EF-hand_8|PF13833.6|6.7e-14	negative regulation of ryanodine-sensitive calcium-release channel activity		none	other localisation	OG0000008	Archaeplastida	NA
EhG20059.1	NA	NA	0.253134	0.0154289	3	3	1.19179	EhG19555	gmst	complete	NDK|PF00334.19|1.9e-52	Nucleoside diphosphate kinase		none	other localisation	OG0000508	Archaeplastida	NA
EhG20274.2	NA	NA	0.197969	0.0360429	2	2	1.14708	EhG4806	gmst	complete	Prok-E2_B|PF14461.6|0.0001,UQ_con|PF00179.26|6.4e-44,UBA|PF00627.31|4.5e-10	protein modification by small protein conjugation	2.82673e+68	none	other localisation	OG0004262	Archaeplastida	NA
EhG20329.1	NA	NA	0.340367	0.016287	2	2	1.26608	NA	gmst	complete	RhoGAP|PF00620.27|2.3e-14	NA	275144	none	other localisation	OG0006159	Hapista	NA
EhG20352.1	NA	NA	0.405322	0.00116196	3	3	1.32438	EhG33607,EhG44545	gmst	complete	NDK|PF00334.19|1.3e-51	Nucleoside diphosphate kinase	1.94699e+126	Defline:Nucleoside diphosphate kinase:Bryony Williams:2009-09-10	signal peptide	OG0000508	Archaeplastida	NA
EhG20361.1	NA	NA	0.256429	0.00483635	3	3	1.19452	EhG33599	gmst	complete	NA	NA	4.12675e+17	none	chloroplast	OG0023348	E_huxleyi	NA
EhG20413.2	NA	NA	0.222669	0.0302311	3	3	1.16689	EhG34161	transdec	complete	bMG10|PF17973.1|3.5e-18,A2M|PF00207.22|9.2e-07,MG2|PF01835.19|4.4e-05,EGF_2|PF07974.13|0.00035	NA	349395308298	none	chloroplast	OG0000985	Archaeplastida	NA
EhG20437.2	Acetyltransferase (GNAT) family		0.664184	0.000822461	3	3	1.58467	EhG34189	gmst	complete	Acetyltransf_7|PF13508.7|1.7e-06,Acetyltransf_10|PF13673.7|2.6e-05,Acetyltransf_1|PF00583.25|2.6e-12	diamine N-acetyltransferase activity		none	signal peptide	OG0005686	Archaeplastida	NA
EhG20457.1	NA	NA	0.562788	0.00016465	3	3	1.47712	EhG34212	getorf	complete	NA	EF-hand domain pair		none	other localisation	OG0002940	Archaeplastida	NA
EhG20467.2	NA	NA	0.118817	0.0367471	3	3	1.08584	EhG34224	gmst	complete	NA	Nuclear segregation protein		none	other localisation	OG0001677	Archaeplastida	NA
EhG20471.1	NA	NA	0.407025	0.00447059	3	3	1.32595	EhG34228	gmst	complete	NA	NA	1.9489e+64	none	other localisation	OG0040792	E_huxleyi	NA
EhG20476.1	Globin	Possible Nitric oxide dioxygenase	0.792366	0.0109109	2	2	1.73191	EhG34233,EhG42738	gmst	complete	Globin|PF00042.22|3.3e-20	oxygen carrier activity		none	other localisation	OG0001089	Archaeplastida	NA
EhG20493.1	NA	NA	0.227652	0.00840013	3	3	1.17093	EhG42719	gmst	complete	PSII_BNR|PF14870.6|4.9e-112	protein transport	861508615186152	none	other localisation	OG0004330	Archaeplastida	NA
EhG2062.11	NA	NA	0.309075	0.00211789	3	3	1.23891	EhG13506	gmst	complete	BTG|PF07742.12|1.6e-16	negative regulation of cell proliferation		none	other localisation	OG0004058	Archaeplastida	NA
EhG20660.3	NA	NA	0.182378	0.0266355	3	3	1.13475	EhG35752	gmst	complete	Gelsolin|PF00626.22|7.7e-11,Sec23_helical|PF04815.15|1.4e-21,zf-Sec23_Sec24|PF04810.15|1e-13,Sec23_BS|PF08033.12|1.2e-29,Sec23_trunk|PF04811.15|6.6e-64	COPII-coated vesicle budding		none	other localisation	OG0001361	Archaeplastida	NA
EhG20683.1	NA	NA	0.430801	0.000492753	3	3	1.34798	EhG35724	gmst	complete	Lyase_1|PF00206.20|2.2e-94,ASL_C2|PF14698.6|1.6e-23	argininosuccinate lyase activity		none	other localisation	OG0003517	Archaeplastida	NA
EhG20685.1	NA	NA	0.440624	0.000815685	3	3	1.35719	EhG35722	getorf	complete	NA	NA	2.79812e+77	none	other localisation	OG0000932	SAR/Hapista	NA
EhG20697.3	NA	NA	0.432143	0.00283987	3	3	1.34924	EhG16189,EhG16190	getorf	complete	NA	photosynthesis		none	signal peptide	OG0005026	Archaeplastida	NA
EhG20845.1	NA	NA	0.479403	0.0324403	3	3	1.39417	EhG201	gmst	complete	Kdo|PF06293.14|2e-05,Haspin_kinase|PF12330.8|9.7e-06,Pkinase_Tyr|PF07714.17|8.6e-30,Pkinase|PF00069.25|2.2e-59	MAP kinase activity		none	other localisation	OG0000035	Archaeplastida	NA
EhG20863.1	NA	NA	0.161319	0.0237744	3	3	1.11831	EhG185	gmst	complete	NA	NA	196543275583	none	signal peptide	OG0002025	Phaocystales	NA
EhG20870.1	NA	NA	0.20944	0.0283231	3	3	1.15624	EhG177	gmst	complete	AMP-binding|PF00501.28|9e-06	NA		none	other localisation	OG0007262	Archaeplastida	NA
EhG20980.1	NA	NA	0.52287	0.0130455	2	2	1.43681	NA	gmst	complete	NA	NA		none	other localisation	OG0001416	Haptophyta	NA
EhG21010.1	NA	NA	0.525818	0.000454857	3	3	1.43975	EhG30715	gmst	complete	NA	NA	365562314615	none	other localisation	OG0004401	Calcihaptophyta	NA
EhG21063.2	NA	NA	0.947806	0.0138848	2	2	1.92894	EhG30766	gmst	5primepartial	NA	NA		none	other localisation	OG0001585	Archaeplastida	NA
EhG21416.4	Ig-like domain from next to BRCA1 gene domain containing protein		0.720886	0.000389156	3	3	1.64819	EhG13949	gmst	complete	ZZ|PF00569.17|0.00023,PB1|PF00564.24|5.4e-08,N_BRCA1_IG|PF16158.5|2e-30	ubiquitin binding		none	other localisation	OG0000460	Archaeplastida	NA
EhG2144.1	NA	NA	0.159676	0.0152967	3	3	1.11704	EhG18848	gmst	complete	FAD_binding_6|PF00970.24|5.7e-23,NAD_binding_1|PF00175.21|4.4e-26	cytochrome-b5 reductase activity, acting on NAD(P)H	9.07059e+56	none	chloroplast	OG0000211	Archaeplastida	NA
EhG21474.1	NA	NA	0.289769	0.0103197	3	3	1.22244	EhG13882	gmst	complete	DUF4079|PF13301.6|3.5e-45	Protein of unknown function (DUF4079)	5.63296e+33	none	signal peptide	OG0003833	Archaeplastida	NA
EhG21496.1	NA	NA	0.249728	0.00270143	3	3	1.18898	EhG13863,EhG21497	gmst	complete	NA	NA	353829	none	signal peptide	OG0041318	E_huxleyi	NA
EhG215.1	NA	NA	0.162797	0.0357722	3	3	1.11946	EhG20834	gmst	complete	Pyr_redox_2|PF07992.14|8.1e-06,NAD_binding_8|PF13450.6|3.3e-09,Amino_oxidase|PF01593.24|1.8e-08	Flavin containing amine oxidoreductase	2.7431e+17	Description:zeta-carotene desaturase-like1	other localisation	OG0001370	Archaeplastida	NA
EhG2150.3	Formate/nitrite transporter		0.687726	0.000581712	3	3	1.61074	EhG18842	gmst	complete	Form_Nir_trans|PF01226.17|1.1e-69	Formate/nitrite transporter	2.53775e+53	none	signal peptide	OG0000446	Archaeplastida	NA
EhG216.1	NA	NA	0.340186	0.00283987	3	3	1.26592	EhG20833	gmst	complete	3Beta_HSD|PF01073.19|0.00073,Semialdhyde_dh|PF01118.24|0.00046,NmrA|PF05368.13|3e-05,NAD_binding_10|PF13460.6|1.6e-33	divinyl chlorophyllide a 8-vinyl-reductase activity	2.26522e+110	none	signal peptide	OG0001932	Archaeplastida	NA
EhG21635.2	NA	NA	0.403964	0.000388636	3	3	1.32314	EhG25437	gmst	complete	NA	NA		none	signal peptide	OG0027402	E_huxleyi	NA
EhG2170.2	NA	NA	0.350008	0.0182966	3	3	1.27457	EhG13465	gmst	complete	Na_Ca_ex|PF01699.24|8.4e-17,Na_Ca_ex|PF01699.24|2.4e-17	calcium:proton antiporter activity	2.59028e+104	none	other localisation	OG0000382	Archaeplastida	NA
EhG21713.1	NA	NA	0.197828	0.0248241	3	3	1.14697	NA	gmst	complete	NA	NA		none	signal peptide	OG0023772	Isochrysidales	NA
EhG21763.2	NA	NA	0.296459	0.0314037	2	2	1.22813	EhG43495	transdec	complete	EF-hand_1|PF00036.32|6.7e-06,EF-hand_7|PF13499.6|2.7e-09,EF-hand_6|PF13405.6|1.1e-05	EF-hand domain pair	67740105281	none	signal peptide	OG0003577	SAR/Hapista	NA
EhG21785.1	NA	NA	0.465762	0.000862011	3	3	1.38105	EhG43883	gmst	complete	PDZ_2|PF13180.6|0.00019,PDZ_6|PF17820.1|5e-08,PDZ|PF00595.24|1.5e-06	NA		none	other localisation	OG0006228	Archaeplastida	NA
EhG21786.2	NA	NA	0.211055	0.00537515	3	3	1.15753	EhG43884	gmst	complete	BTHB|PF18410.1|3e-16,NAP|PF00956.18|2.1e-65,NAP|PF00956.18|0.00034	Belongs to the nucleosome assembly protein (NAP) family		none	other localisation	OG0000812	Archaeplastida	NA
EhG22093.1	NA	NA	0.21402	0.0140643	3	3	1.15992	EhG8519	getorf	complete	NA	UMP salvage	2.75754e+41	none	signal peptide	OG0001615	Archaeplastida	NA
EhG22100.2	NA	NA	0.301201	0.00223951	3	3	1.23217	EhG8529	getorf	complete	NA	chromatin organization		none	other localisation	OG0001810	Archaeplastida	NA
EhG22143.1	NA	NA	0.259382	0.00407493	3	3	1.19697	EhG8574	gmst	complete	NA	Belongs to the peroxisomal membrane protein PXMP2 4 family		none	signal peptide	OG0007600	Archaeplastida	NA
EhG22154.2	NA	NA	0.162035	0.0343863	3	3	1.11886	EhG8587	gmst	complete	DUF1995|PF09353.10|2.8e-31	Domain of unknown function (DUF1995)		none	signal peptide	OG0003834	Archaeplastida	NA
EhG22196.1	NA	NA	0.441844	0.00272948	3	3	1.35834	EhG21410	gmst	complete	NA	NA	2.1321e+17	none	signal peptide	OG0014302	Phaocystales	NA
EhG222.1	NA	NA	0.362896	0.00202543	3	3	1.286	EhG20825	gmst	complete	NA	NA		none	other localisation	OG0000932	SAR/Hapista	NA
EhG22226.2	NA	NA	0.210046	0.00505966	3	3	1.15672	EhG17377	gmst	complete	UDPGP|PF01704.18|1e-15	Utp--glucose-1-phosphate uridylyltransferase		none	other localisation	OG0000367	Archaeplastida	NA
EhG22277.1	NA	NA	0.202185	0.0379338	3	3	1.15044	EhG17426,EhG22276	gmst	complete	NA	NA	2.79136e+41	none	other localisation	OG0054824	E_huxleyi	NA
EhG22331.1	NA	NA	0.496452	0.0274316	3	3	1.41074	EhG16924	gmst	5primepartial	F5_F8_type_C|PF00754.25|2.9e-06,F5_F8_type_C|PF00754.25|2.9e-06	sulfuric ester hydrolase activity		none	other localisation	OG0004231	Archaeplastida	NA
EhG2238.1	NA	NA	0.426208	0.00189567	3	3	1.3437	EhG13409,EhG44359	gmst	complete	NA	NA		none	other localisation	OG0000541	Archaeplastida	NA
EhG2240.1	NA	NA	0.243289	0.00263666	3	3	1.18369	EhG13407,EhG44354	gmst	complete	CLP_protease|PF00574.23|1.9e-76	serine-type endopeptidase activity		none	other localisation	OG0000207	Archaeplastida	NA
EhG22433.1	NA	NA	0.14238	0.0280952	3	3	1.10372	EhG16820	gmst	complete	UQ_con|PF00179.26|1.2e-12	protein K63-linked ubiquitination	8.78189e+20	none	other localisation	OG0001516	Archaeplastida	NA
EhG22527.1	NA	NA	0.175515	0.0477101	3	3	1.12937	NA	gmst	5primepartial	PMSR|PF01625.21|7e-06	Has an important function as a repair enzyme for proteins that have been inactivated by oxidation. Catalyzes the reversible oxidation-reduction of methionine sulfoxide in proteins to methionine		none	other localisation	OG0014320	Haptophyta	NA
EhG22629.1	NA	NA	0.520283	0.000790667	3	3	1.43424	EhG34131	gmst	complete	LSM|PF01423.22|1e-18	spliceosomal snRNP assembly		none	other localisation	OG0003653	Archaeplastida	NA
EhG2265.1	NA	NA	0.57372	0.00513615	2	2	1.48836	EhG13380	gmst	complete	Epimerase|PF01370.21|1.5e-07,NAD_binding_10|PF13460.6|1.2e-06,3Beta_HSD|PF01073.19|1.1e-06,RmlD_sub_bind|PF04321.17|5.6e-08	NADH dehydrogenase ubiquinone 1 alpha subcomplex subunit 9	2.79933e+63	none	other localisation	OG0003172	Archaeplastida	NA
EhG22726.2	NA	NA	0.341671	0.00103948	3	3	1.26722	EhG8689	gmst	5primepartial	Ufm1|PF03671.14|6.8e-39	protein polyufmylation		none	other localisation	OG0004770	Archaeplastida	NA
EhG2273.2	Chlorophyll A-B binding protein		0.970876	0.000180548	3	3	1.96003	EhG13373	gmst	complete	Chloroa_b-bind|PF00504.21|1.6e-36	Chlorophyll A-B binding protein	2.1734e+17	Name:Lhcf73:Stephane Lefebvre:2010-08-31 Description:Light harvesting chlorophyll a/c binding protein. Part of LI818 & LI818-like group.:Stephane Lefebvre:2010-08-31 Model Notes:No issues:Stephane Lefebvre:2010-08-31 Defline:Light harvesting protein:Stephane Lefebvre:2010-08-31 Disposition:Catalog:Stephane Lefebvre:2010-08-31 EST evidence:No:Stephane Lefebvre:2010-08-31	signal peptide	OG0000105	Archaeplastida	NA
EhG22827.2	NA	NA	0.348703	0.00270493	3	3	1.27341	EhG5683	gmst	5primepartial	Cytochrom_C|PF00034.21|6.7e-12,Cytochrome_CBB3|PF13442.6|9.7e-06	electron transfer activity	2.47212e+113	none	mitochondrion	OG0001672	Archaeplastida	NA
EhG23058.5	Chlorophyll A-B binding protein		3.9875	1.82667e-06	3	3	15.8619	EhG13930,EhG17582,EhG31838,EhG38202,EhG38701	gmst	complete	Chloroa_b-bind|PF00504.21|9.1e-35	Chlorophyll A-B binding protein	2.37574e+100	none	other localisation	OG0000105	Archaeplastida	NA
EhG23075.1	NA	NA	0.193363	0.0236109	3	3	1.14343	EhG39491	gmst	complete	Myb_DNA-bind_6|PF13921.6|5.2e-13,Myb_DNA-binding|PF00249.31|2.2e-07,Myb_DNA-binding|PF00249.31|1.2e-10,Myb_DNA-bind_6|PF13921.6|1.6e-06,Myb_Cef|PF11831.8|6.5e-47	RNA polymerase II transcription regulator recruiting activity	5.82926e+37	none	other localisation	OG0002468	Archaeplastida	NA
EhG23079.1	NA	NA	0.340813	0.00423199	3	3	1.26647	EhG39493	getorf	complete	NA	Endonuclease/Exonuclease/phosphatase family		none	mitochondrion	OG0002216	Archaeplastida	NA
EhG23147.9	NA	NA	0.324195	0.00570231	3	3	1.25197	EhG20801,EhG40416	gmst	complete	RRM_1|PF00076.22|2.1e-15,RRM_1|PF00076.22|7.7e-17,RRM_1|PF00076.22|3.3e-15	rRNA processing	2.84678e+75	none	other localisation	OG0001114	Archaeplastida	NA
EhG2334.4	NA	NA	0.165275	0.0367793	3	3	1.12138	EhG13308	gmst	complete	AAA_22|PF13401.6|0.00037,AAA_5|PF07728.14|3.4e-05,MCM|PF00493.23|0.00024,AAA_2|PF07724.14|2.6e-35,AAA_2|PF07724.14|3.1e-05,AAA|PF00004.29|2e-05,AAA|PF00004.29|5.4e-06,ClpB_D2-small|PF10431.9|0.00017,AAA_33|PF13671.6|1.1e-05	unfolded protein binding		none	mitochondrion	OG0002471	Archaeplastida	NA
EhG23340.1	NA	NA	0.240356	0.0109793	3	3	1.18128	EhG33204	getorf	complete	NA	aldehyde dehydrogenase (NAD) activity	5.96226e+25	none	other localisation	OG0000066	Archaeplastida	NA
EhG23637.1	NA	NA	0.384885	0.00408938	3	3	1.30576	EhG12111	gmst	complete	NA	DHH family		none	signal peptide	OG0011948	Phaocystales	NA
EhG23660.1	NA	NA	0.529246	0.000372559	3	3	1.44317	EhG12090	gmst	complete	Spindle_Spc25|PF08234.12|1.1e-17	Chromosome segregation protein Spc25		none	other localisation	OG0003753	Archaeplastida	NA
EhG23665.2	NA	NA	0.438032	0.00739325	3	3	1.35475	EhG12088	gmst	complete	CSD|PF00313.22|1.5e-12,OB_RNB|PF08206.11|0.00017,CSD|PF00313.22|2.8e-10,OB_RNB|PF08206.11|0.00014	Cold shock protein domain		none	other localisation	OG0000564	SAR/Hapista	NA
EhG23779.2	Flavodoxin		2.06567	0.000142285	3	3	4.18627	EhG11985	gmst	complete	Flavodoxin_5|PF12724.7|3.1e-06,Flavodoxin_3|PF12641.7|4.2e-06,Flavodoxin_1|PF00258.25|5.1e-25	Flavodoxin		none	signal peptide	OG0008405	Archaeplastida	NA
EhG23811.1	NA	NA	0.459449	0.000584557	3	3	1.37502	EhG44220	gmst	complete	NA	NA	2.30362e+23	none	other localisation	OG0009048	Phaocystales	NA
EhG23832.1	NA	NA	0.187453	0.0203228	3	3	1.13875	EhG18527	getorf	complete	NA	NA	371991	none	signal peptide	OG0006205	SAR/Hapista	NA
EhG23900.2	NA	NA	0.160842	0.0466569	3	3	1.11794	EhG18593	gmst	5primepartial	JAB|PF01398.21|1.2e-11,MitMem_reg|PF13012.6|1.7e-23	protein deneddylation		none	other localisation	OG0002770	Archaeplastida	NA
EhG24003.1	NA	NA	0.335053	0.00270143	3	3	1.26142	EhG11574	gmst	5primepartial	tRNA-synt_2|PF00152.20|2.5e-75,tRNA_anti-codon|PF01336.25|6.6e-06	aspartyl-tRNA aminoacylation		none	other localisation	OG0000842	Archaeplastida	NA
EhG24020.2	NA	NA	0.14526	0.0267787	3	3	1.10593	EhG11558	gmst	complete	NA	NA		none	other localisation	OG0014510	Isochrysidales	NA
EhG24079.1	NA	NA	0.47318	0.000606721	3	3	1.38817	EhG2420	gmst	5primepartial	Tom22|PF04281.13|1.8e-06	NA	369763316256	none	other localisation	OG0008565	Archaeplastida	NA
EhG24238.1	NA	NA	0.132567	0.0326727	3	3	1.09624	EhG10662	gmst	complete	NA	NA		none	other localisation	OG0032678	E_huxleyi	NA
EhG24336.1	NA	NA	0.269467	0.0156857	3	3	1.20536	EhG2959	gmst	complete	NA	NA	95506	none	other localisation	OG0011051	Phaocystales	NA
EhG24423.3	NA	NA	0.330845	0.00112903	3	3	1.25775	EhG43197,EhG43198	gmst	complete	Aldedh|PF00171.22|1.9e-163	succinate-semialdehyde dehydrogenase (NAD+) activity		none	mitochondrion	OG0000066	Archaeplastida	NA
EhG24433.3	NA	NA	0.191391	0.00849029	3	3	1.14186	EhG36913	gmst	complete	Pro_isomerase|PF00160.21|3.5e-44	peptidyl-prolyl cis-trans isomerase activity	2.8385e+86	none	signal peptide	OG0000022	Archaeplastida	NA
EhG24436.4	NA	NA	0.622602	0.000130374	3	3	1.53965	EhG36915	getorf	complete	NA	NA	2.38598e+41	none	signal peptide	OG0002114	Archaeplastida	NA
EhG24466.2	NA	NA	0.299687	0.00521604	3	3	1.23088	EhG36939	gmst	complete	Proteasome_A_N|PF10584.9|1.4e-13,Proteasome|PF00227.26|4e-58	The proteasome is a multicatalytic proteinase complex which is characterized by its ability to cleave peptides with Arg, Phe, Tyr, Leu, and Glu adjacent to the leaving group at neutral or slightly basic pH		none	other localisation	OG0001949	Archaeplastida	NA
EhG24501.13	NA	NA	0.186276	0.0280111	3	3	1.13782	EhG36973	gmst	complete	Acyltransferase|PF01553.21|1.1e-12	sn-1-glycerol-3-phosphate C16:0-DCA-CoA acyl transferase activity		none	signal peptide	OG0001670	Archaeplastida	NA
EhG24503.1	NA	NA	0.672865	0.00124661	3	3	1.59424	NA	gmst	complete	NA	NA	2.82336e+23	none	mitochondrion	OG0007438	SAR/Hapista	NA
EhG24512.5	NA	NA	0.522798	0.000276366	3	3	1.43674	NA	gmst	complete	SHMT|PF00464.19|2.1e-202	glycine hydroxymethyltransferase activity		none	mitochondrion	OG0000321	Archaeplastida	NA
EhG24540.1	NA	NA	0.181833	0.0457661	3	3	1.13432	EhG43299	gmst	complete	GLTP|PF08718.11|5.3e-23	intermembrane lipid transfer activity	2.82009e+35	none	other localisation	OG0001015	Archaeplastida	NA
EhG24597.3	NA	NA	0.635015	0.000382568	3	3	1.55295	NA	gmst	complete	NA	NA		none	signal peptide	OG0006115	Archaeplastida	NA
EhG24599.1	Threonyl or Alanyl tRNA synthetase		0.682979	0.000207085	3	3	1.60545	NA	transdec	complete	tRNA-synt_2b|PF00587.25|9.9e-28,HGTP_anticodon|PF03129.20|1.6e-20,tRNA_SAD|PF07973.14|5.8e-12,TGS|PF02824.21|1e-07	threonyl-tRNA aminoacylation		none	other localisation	OG0000505	Archaeplastida	NA
EhG24600.1	NA	NA	0.327118	0.00556173	3	3	1.2545	NA	getorf	complete	NA	Haloacid dehalogenase-like hydrolase		none	signal peptide	OG0005296	Archaeplastida	NA
EhG24616.3	NA	NA	0.46838	0.000366974	3	3	1.38356	NA	gmst	complete	PFK|PF00365.20|2.3e-32	6-phosphofructokinase activity		none	other localisation	OG0004834	Archaeplastida	NA
EhG24743.1	NA	NA	0.385006	0.0141851	3	3	1.30587	EhG37481	gmst	complete	NA	NA		none	signal peptide	OG0020355	Calcihaptophyta	NA
EhG24804.1	NA	NA	0.223034	0.0233921	3	3	1.16719	EhG26068	gmst	complete	Ank_2|PF12796.7|3.8e-07,Ank_5|PF13857.6|5.7e-06	NA	358488	none	other localisation	OG0004312	Archaeplastida	NA
EhG24807.1	NA	NA	0.23667	0.00514305	3	3	1.17827	EhG26071	gmst	complete	Hydrolase|PF00702.26|4.3e-14,Hydrolase_like|PF13242.6|1.5e-06,HAD_2|PF13419.6|1e-18	pseudouridine 5'-phosphatase activity	8.82519e+29	none	signal peptide	OG0001145	Archaeplastida	NA
EhG24846.2	NA	NA	0.216121	0.0438192	3	3	1.16161	EhG26120	getorf	complete	NA	Ribosomal protein L35		none	chloroplast	OG0006660	Archaeplastida	NA
EhG24897.1	NA	NA	0.51181	0.000214233	3	3	1.42584	EhG26180	getorf	complete	NA	NA	107636	none	other localisation	OG0013289	Calcihaptophyta	NA
EhG2495.1	NA	NA	0.209084	0.00625481	3	3	1.15595	EhG19970	gmst	complete	Prok-JAB|PF14464.6|0.00085,CSN5_C|PF18323.1|3.1e-20,JAB|PF01398.21|1.4e-29	protein deneddylation	2.25496e+77	none	other localisation	OG0002845	Archaeplastida	NA
EhG25074.3	NA	NA	0.211241	0.0428414	3	3	1.15768	EhG31441	gmst	complete	SAP|PF02037.27|7.2e-08	NA	NA	NA	signal peptide	OG0006976	Phaocystales	NA
EhG25075.1	NA	NA	0.172584	0.0388298	3	3	1.12708	EhG31442	gmst	complete	NA	NA	2.23035e+44	none	signal peptide	OG0002029	Archaeplastida	NA
EhG25096.2	NA	NA	0.542285	0.00256357	3	3	1.45628	NA	gmst	complete	DAGK_cat|PF00781.24|2.9e-17,DAGK_acc|PF00609.19|4.6e-12	protein kinase C-activating G-protein coupled receptor signaling pathway		none	signal peptide	OG0000858	Archaeplastida	NA
EhG25112.1	NA	NA	0.438854	0.0251737	2	2	1.35553	EhG32656,EhG43909	gmst	complete	NA	NA		none	mitochondrion	OG0009949	Phaocystales	NA
EhG25237.3	NA	NA	0.270372	0.00141327	3	3	1.20612	EhG32890	gmst	complete	NA	PAP_fibrillin		none	signal peptide	OG0002272	Archaeplastida	NA
EhG25426.2	Stress responsive A/B Barrel Domain containing		0.901229	0.000126691	3	3	1.86766	EhG19499	getorf	complete	NA	NA		none	other localisation	OG0004016	Archaeplastida	NA
EhG25537.2	NA	NA	0.76328	0.000833785	3	3	1.69734	NA	gmst	complete	NA	nitrile biosynthetic process	2.01097e+47	none	other localisation	OG0027157	E_huxleyi	NA
EhG25558.2	NA	NA	0.360756	0.00737512	3	3	1.2841	EhG30463	gmst	complete	NAD_binding_1|PF00175.21|9.8e-21	NADPH-hemoprotein reductase activity		none	signal peptide	OG0000218	Archaeplastida	NA
EhG2565.1	NA	NA	0.207762	0.0292406	3	3	1.1549	EhG19893	gmst	complete	NA	NA	2.01609e+34	none	other localisation	OG0002114	Archaeplastida	NA
EhG25694.1	CS domain containing protein		0.660861	0.000520685	3	3	1.58103	EhG25695,EhG40337,EhG40338	gmst	complete	CS|PF04969.16|1.6e-07	NA	2.00523e+28	none	other localisation	OG0012126	SAR/Hapista	NA
EhG25806.4	NA	NA	0.409965	0.000815685	3	3	1.32865	EhG36729	gmst	complete	NA	ATP-dependent DNA helicase activity		none	signal peptide	OG0018741	Isochrysidales	NA
EhG25807.1	NA	NA	0.322009	0.0232695	2	2	1.25007	EhG36728	gmst	complete	DSPc|PF00782.20|1.1e-05	protein tyrosine/serine/threonine phosphatase activity		none	other localisation	OG0012229	Archaeplastida	NA
EhG25879.2	DUF3119 containing protein		0.592658	0.00054861	3	3	1.50802	EhG15278	gmst	complete	DUF3119|PF11317.8|5.2e-29	Protein of unknown function (DUF3119)		none	signal anchor	OG0002385	Archaeplastida	NA
EhG2595.2	NA	NA	0.301662	0.00199777	3	3	1.23256	EhG19870	gmst	complete	GHMP_kinases_N|PF00288.26|1.2e-08,GHMP_kinases_C|PF08544.13|1.5e-12	mevalonate kinase activity		none	other localisation	OG0003949	Archaeplastida	NA
EhG26003.1	NA	NA	0.31676	0.00674984	3	3	1.24553	EhG11491	gmst	complete	NA	NA		none	signal peptide	OG0083247	E_huxleyi	Coccolithophore specific in 1/6 species
EhG26009.3	NA	NA	0.381469	0.00053634	3	3	1.30267	EhG11497	gmst	complete	NA	NA		none	other localisation	OG0001572	Phaocystales	NA
EhG2602.1	NA	NA	0.229225	0.00856611	3	3	1.1722	EhG19865	gmst	complete	Hydrolase|PF00702.26|1.2e-07,HAD_2|PF13419.6|0.00011	NA		none	other localisation	OG0009157	SAR/Hapista	NA
EhG26225.2	NA	NA	0.334151	0.0381515	3	3	1.26064	EhG40286	transdec	complete	zf-Tim10_DDP|PF02953.15|1.4e-19	Tim10/DDP family zinc finger		none	other localisation	OG0002337	Archaeplastida	NA
EhG26278.8	NA	NA	0.17201	0.0278276	3	3	1.12663	EhG13227	gmst	complete	ABC_tran|PF00005.27|4e-19,AAA_21|PF13304.6|4.9e-05,ABC_tran|PF00005.27|1.7e-13,AAA_21|PF13304.6|0.00063	protein kinase regulator activity		none	other localisation	OG0000206	Archaeplastida	NA
EhG2646.3	NA	NA	0.279899	0.0270017	3	3	1.21411	EhG19830	gmst	complete	Epimerase|PF01370.21|4.1e-54,3Beta_HSD|PF01073.19|7.6e-18,NAD_binding_10|PF13460.6|2.1e-06,RmlD_sub_bind|PF04321.17|6.4e-12,GDP_Man_Dehyd|PF16363.5|7.8e-59,KR|PF08659.10|4.8e-07,Polysacc_synt_2|PF02719.15|2e-13,adh_short|PF00106.25|2.9e-09	racemase and epimerase activity, acting on carbohydrates and derivatives	4.03272e+35	none	signal peptide	OG0000757	Archaeplastida	NA
EhG2648.2	NA	NA	0.424101	0.00314454	3	3	1.34174	EhG19828	gmst	complete	Ribonuc_L-PSP|PF01042.21|1.6e-18	endoribonuclease L-PSP	20150398444	none	signal peptide	OG0002685	Archaeplastida	NA
EhG26484.1	NA	NA	0.241821	0.00377815	3	3	1.18248	EhG9155	getorf	complete	NA	threonine-type endopeptidase activity	2.65671e+45	none	other localisation	OG0002403	Archaeplastida	NA
EhG265.3	NA	NA	0.468824	0.00408938	3	3	1.38398	NA	gmst	complete	Sod_Ni|PF09055.11|4.6e-29,Ubiquitin_2|PF14560.6|0.00051,ubiquitin|PF00240.23|1.6e-33,Rad60-SLD|PF11976.8|2.4e-15	ubiquitin		none	other localisation	OG0002039	Archaeplastida	NA
EhG26513.1	NA	NA	0.262888	0.00230904	3	3	1.19988	EhG9182	gmst	complete	Chloroa_b-bind|PF00504.21|2e-06,Chloroa_b-bind|PF00504.21|6.5e-29	Chlorophyll A-B binding protein		none	other localisation	OG0000018	Archaeplastida	NA
EhG26555.1	NA	NA	0.241102	0.020357	3	3	1.1819	EhG9226	gmst	complete	Helicase_C|PF00271.31|1.5e-29,DEAD|PF00270.29|3.5e-33	RNA helicase activity	4881063548352660	none	other localisation	OG0000233	Archaeplastida	NA
EhG26568.1	NA	NA	0.177821	0.0475696	3	3	1.13117	EhG9239	getorf	complete	NA	exon-exon junction complex disassembly		none	other localisation	OG0005882	Archaeplastida	NA
EhG26718.1	NA	NA	0.214952	0.0113038	3	3	1.16067	EhG26868	gmst	complete	SM-ATX|PF14438.6|0.00017,LSM|PF01423.22|6.4e-19	U7 snRNA binding	2.80103e+38	none	other localisation	OG0002965	Archaeplastida	NA
EhG26825.1	NA	NA	0.289838	0.00921012	3	3	1.2225	EhG18253	gmst	complete	Complex1_30kDa|PF00329.19|1.2e-42	NADH dehydrogenase (quinone) activity	8.74129e+39	none	other localisation	OG0007532	Archaeplastida	NA
EhG2694.1	NA	NA	0.215437	0.0357722	3	3	1.16106	EhG19784	getorf	complete	NA	NA		none	signal peptide	OG0020890	Phaocystales	NA
EhG26982.1	Chlorophyll A-B binding protein		0.955582	4.45389e-05	3	3	1.93936	EhG26602	gmst	complete	Chloroa_b-bind|PF00504.21|7.6e-38	Chlorophyll A-B binding protein	2.27202e+98	none	other localisation	OG0000105	Archaeplastida	NA
EhG27111.3	NA	NA	0.308653	0.010722	3	3	1.23855	NA	gmst	complete	Chloroa_b-bind|PF00504.21|3.4e-38	Chlorophyll A-B binding protein		none	other localisation	OG0000105	Archaeplastida	NA
EhG27155.1	NA	NA	0.229662	0.0265127	3	3	1.17256	EhG9526	gmst	complete	Costars|PF14705.6|5.6e-14	positive regulation of Rho protein signal transduction	4.02923e+23	none	other localisation	OG0003863	Archaeplastida	NA
EhG27170.1	NA	NA	0.180051	0.0451855	2	2	1.13292	EhG9542	getorf	complete	NA	Prefoldin subunit	20015597794	none	other localisation	OG0004507	Archaeplastida	NA
EhG2721.1	NA	NA	0.317532	0.00239666	3	3	1.2462	EhG30930	gmst	complete	CLP_protease|PF00574.23|1.2e-52	serine-type endopeptidase activity		none	other localisation	OG0002119	Archaeplastida	NA
EhG2724.2	NA	NA	0.295838	0.00214055	3	3	1.2276	EhG30933	transdec	complete	NA	NA		none	other localisation	OG0005893	SAR/Hapista	NA
EhG27445.1	NA	NA	0.38905	0.00107616	3	3	1.30953	EhG38593	gmst	complete	Polysacc_synt_2|PF02719.15|2.9e-05,GDP_Man_Dehyd|PF16363.5|5.9e-16,Epimerase|PF01370.21|2.4e-27,RmlD_sub_bind|PF04321.17|1.5e-15,3Beta_HSD|PF01073.19|5.6e-09	L-threonine 3-dehydrogenase activity		none	signal peptide	OG0005162	Archaeplastida	NA
EhG27472.1	NA	NA	0.42823	0.000584557	3	3	1.34558	EhG17101	gmst	complete	NA	NA		none	other localisation	OG0001555	Archaeplastida	NA
EhG27580.7	NA	NA	0.258527	0.0202047	3	3	1.19626	EhG14630	getorf	complete	NA	ATP binding		none	other localisation	OG0000029	Archaeplastida	NA
EhG27683.1	Subtilase family serine protease	Often cell wall targetted in plants, regulatory	0.613662	0.000552919	3	3	1.53014	EhG44666	gmst	complete	Peptidase_S8|PF00082.22|3.4e-10,Pro-kuma_activ|PF09286.11|8e-22	tripeptidyl-peptidase activity		none	other localisation	OG0000456	Archaeplastida	NA
EhG27696.1	NA	NA	0.489811	0.0030979	3	3	1.40426	NA	gmst	complete	Aldedh|PF00171.22|5.1e-86	aldehyde dehydrogenase (NAD) activity		none	other localisation	OG0003409	Archaeplastida	NA
EhG27717.2	NA	NA	0.418823	0.00291128	3	3	1.33684	EhG33498	gmst	complete	Peptidase_C13|PF01650.18|4.3e-101	cysteine-type peptidase activity		none	signal peptide	OG0001310	Archaeplastida	NA
EhG2789.1	NA	NA	0.381766	0.000593688	3	3	1.30294	EhG30995	getorf	complete	NA	PsbP		none	signal peptide	OG0005763	Archaeplastida	NA
EhG28015.6	NA	NA	0.214511	0.00620994	3	3	1.16031	EhG42824	gmst	complete	Cofilin_ADF|PF00241.20|7.2e-37	actin filament depolymerization	8.84489e+68	none	other localisation	OG0000593	Archaeplastida	NA
EhG28074.3	NA	NA	0.191903	0.0175036	3	3	1.14227	EhG41422	gmst	complete	FKBP_C|PF00254.28|5.1e-24	Peptidyl-prolyl cis-trans isomerase	2.80163e+71	none	other localisation	OG0001936	Archaeplastida	NA
EhG28165.6	NA	NA	0.162317	0.0283231	3	3	1.11908	EhG11230	gmst	complete	FKBP_C|PF00254.28|5.2e-18	histone peptidyl-prolyl isomerization	484685697558079	none	signal peptide	OG0003804	Archaeplastida	NA
EhG28307.1	NA	NA	0.43899	0.00060054	3	3	1.35565	EhG5469	gmst	complete	NA	NA		none	signal peptide	OG0009420	Phaocystales	NA
EhG28362.1	NA	NA	0.520092	0.00143991	3	3	1.43405	EhG12241	gmst	complete	QRPTase_C|PF01729.19|4.2e-52,QRPTase_N|PF02749.16|4.2e-17	quinolinate catabolic process		none	other localisation	OG0002391	Archaeplastida	NA
EhG28397.4	NA	NA	0.160865	0.0278654	3	3	1.11796	EhG12273	gmst	complete	RRF|PF01765.19|8.7e-51	ribosomal large subunit binding	2.04056e+67	Defline:ribosome recycling factor:Mark van der Giezen:2009-09-10	signal peptide	OG0001316	Archaeplastida	NA
EhG28458.4	NA	NA	0.162751	0.0205767	3	3	1.11942	EhG12344	gmst	complete	Transket_pyr|PF02779.24|1.7e-43,Transketolase_C|PF02780.20|7.3e-36	3-methyl-2-oxobutanoate dehydrogenase (2-methylpropanoyl-transferring) activity	2.77259e+23	none	mitochondrion	OG0003146	Archaeplastida	NA
EhG28624.1	Chlorophyll A-B binding protein		1.19802	0.000245063	3	3	2.29424	EhG7762	gmst	complete	Chloroa_b-bind|PF00504.21|6.9e-38	Chlorophyll A-B binding protein	2.80432e+68	none	signal peptide	OG0000105	Archaeplastida	NA
EhG28643.1	Pyridoxal-dependent decarboxylase	Putative ornithine decarboyxlyase – polyamine synthesis	0.71146	0.00160421	3	3	1.63746	EhG7778	gmst	complete	Orn_DAP_Arg_deC|PF00278.22|4e-16,Orn_Arg_deC_N|PF02784.16|9.1e-26	putrescine biosynthetic process from ornithine		none	signal peptide	OG0002508	Archaeplastida	NA
EhG28759.1	NA	NA	0.177281	0.0243426	3	3	1.13075	EhG7108	gmst	complete	ketoacyl-synt|PF00109.26|0.0001,Thiolase_C|PF02803.18|6.7e-44,Thiolase_N|PF00108.23|1.7e-85	acetyl-CoA C-acetyltransferase activity		none	mitochondrion	OG0000419	Archaeplastida	NA
EhG28799.1	NA	NA	0.161025	0.0165081	3	3	1.11808	EhG37010	gmst	complete	Carboxyl_trans|PF01039.22|6.3e-148	CoA carboxylase activity	278143	none	mitochondrion	OG0000659	Archaeplastida	NA
EhG28817.1	NA	NA	0.172041	0.0248241	3	3	1.12665	EhG37024	gmst	complete	CSN8_PSD8_EIF3K|PF10075.9|1.1e-22	ribosome binding	2.29611e+89	none	other localisation	OG0003129	Archaeplastida	NA
EhG28914.4	NA	NA	0.425318	0.00439362	3	3	1.34287	EhG8610	gmst	complete	NA	NA	2.47421e+71	none	other localisation	OG0040612	E_huxleyi	NA
EhG28922.1	NA	NA	0.25049	0.0103181	3	3	1.18961	EhG8622	gmst	complete	NA	NA	2.66656e+16	none	other localisation	OG0001780	SAR/Hapista	NA
EhG28941.1	NA	NA	0.14386	0.024985	3	3	1.10486	EhG8641	gmst	complete	AlaDh_PNT_C|PF01262.21|5.7e-65,PNTB|PF02233.16|2.1e-169,PNTB_4TM|PF12769.7|7.7e-30,AlaDh_PNT_N|PF05222.15|7e-39	Transhydrogenase		none	mitochondrion	OG0000792	Archaeplastida	NA
EhG2895.1	NA	NA	0.384472	0.00148581	3	3	1.30538	EhG40743	gmst	complete	Ufd2P_core|PF10408.9|3.4e-146,U-box|PF04564.15|8.1e-26	peptidyl-tyrosine sulfation		none	other localisation	OG0001616	Archaeplastida	NA
EhG29136.2	NA	NA	0.433667	0.0348678	2	2	1.35066	EhG3799	gmst	complete	RRM_1|PF00076.22|6e-10	U6 snRNA binding		none	other localisation	OG0001321	Archaeplastida	NA
EhG29253.2	NA	NA	0.384651	0.00436972	3	3	1.30554	EhG3908	gmst	complete	NA	apoptotic process	2.85039e+59	none	signal peptide	OG0009493	Phaocystales	NA
EhG29377.2	NA	NA	0.3169	0.000815685	3	3	1.24565	EhG38774	gmst	complete	Prefoldin_2|PF01920.20|1.4e-15	unfolded protein binding	7595575957	none	other localisation	OG0002739	Archaeplastida	NA
EhG29481.1	NA	NA	0.362266	0.000801715	3	3	1.28544	EhG27315	gmst	complete	ATP-cone|PF03477.16|4.5e-19,Ribonuc_red_lgN|PF00317.21|6.1e-24,Ribonuc_red_lgC|PF02867.15|3.1e-184	Provides the precursors necessary for DNA synthesis. Catalyzes the biosynthesis of deoxyribonucleotides from the corresponding ribonucleotides		none	other localisation	OG0000795	Archaeplastida	NA
EhG29531.1	NA	NA	0.243098	0.0050448	3	3	1.18353	EhG27361	gmst	complete	NA	NA		none	signal peptide	OG0000312	Archaeplastida	NA
EhG29563.5	NA	NA	0.350771	0.000525307	3	3	1.27524	EhG14680	gmst	complete	Cpn60_TCP1|PF00118.24|1.9e-92	protein refolding		none	mitochondrion	OG0000318	Archaeplastida	NA
EhG29589.1	NA	NA	0.269237	0.0181448	3	3	1.20517	EhG14707,EhG29588	gmst	complete	PITH|PF06201.13|2.6e-36	PITH domain		none	other localisation	OG0000599	Archaeplastida	NA
EhG29640.2	NA	NA	0.421204	0.000366974	3	3	1.33904	EhG14763	gmst	complete	Aldedh|PF00171.22|5.3e-33	Dehydrogenase		none	mitochondrion	OG0004180	Archaeplastida	NA
EhG29650.1	NA	NA	0.280532	0.00481329	3	3	1.21464	EhG14771	gmst	complete	NA	NA		none	signal peptide	OG0001654	Archaeplastida	NA
EhG29814.8	NA	NA	0.377105	0.0110335	3	3	1.29873	EhG80	gmst	complete	NA	NA		none	signal peptide	OG0041106	E_huxleyi	NA
EhG29947.19	NA	NA	0.376588	0.00115333	3	3	1.29827	EhG33117	gmst	complete	Chloroa_b-bind|PF00504.21|1.2e-32	Chlorophyll A-B binding protein	2.75442e+146	none	signal peptide	OG0003702	SAR/Hapista	NA
EhG29987.1	NA	NA	0.572025	0.00249653	3	3	1.48661	EhG30829	gmst	5primepartial	ThylakoidFormat|PF11264.8|2.4e-24	May be involved in photosynthetic membrane biogenesis		none	signal peptide	OG0002872	Archaeplastida	NA
EhG29991.1	NA	NA	0.509457	0.000508227	3	3	1.42351	EhG30836	gmst	complete	NA	NA	2.32287e+119	none	signal peptide	OG0007891	Phaocystales	NA
EhG30024.4	NA	NA	0.21418	0.040487	3	3	1.16004	EhG30865	gmst	complete	cobW|PF02492.19|4.8e-57,CobW_C|PF07683.14|2e-19	ATP binding		none	other localisation	OG0000029	Archaeplastida	NA
EhG30287.2	NA	NA	0.327729	0.0360607	2	2	1.25504	EhG39139	gmst	complete	eIF2A|PF08662.11|0.00044,WD40|PF00400.32|0.00012,WD40|PF00400.32|0.00015,WD40|PF00400.32|1.1e-05	transcription-dependent tethering of RNA polymerase II gene DNA at nuclear periphery		none	other localisation	OG0000777	Archaeplastida	NA
EhG30312.1	NA	NA	0.478138	0.000642626	3	3	1.39294	EhG39116,EhG39117	getorf	complete	NA	6-phosphogluconolactonase activity	410926	none	signal peptide	OG0006211	Archaeplastida	NA
EhG30321.3	NA	NA	0.467209	0.000584557	3	3	1.38243	EhG39107	gmst	5primepartial	NA	NA		none	other localisation	OG0012467	Phaocystales	NA
EhG30508.2	NA	NA	0.409907	0.000893281	3	3	1.3286	EhG31769	gmst	complete	NA	NA		none	signal peptide	OG0083190	E_huxleyi	Coccolithophore specific in 1/6 species
EhG3051.1	NA	NA	0.556997	0.000239259	3	3	1.4712	EhG24255	gmst	complete	FoP_duplication|PF13865.6|2.8e-06	NA		none	mitochondrion	OG0040707	E_huxleyi	NA
EhG30529.2	NA	NA	0.540314	0.0307484	3	3	1.45429	EhG18649	gmst	5primepartial	NA	NA	2.77875e+83	none	other localisation	OG0007281	Phaocystales	NA
EhG30664.1	NA	NA	0.377343	0.0249899	2	2	1.29895	EhG16683	gmst	complete	NA	NA	218312106469	none	signal peptide	OG0006071	Archaeplastida	NA
EhG30727.1	NA	NA	0.222127	0.0350347	3	3	1.16645	EhG21021	gmst	complete	Robl_LC7|PF03259.17|0.00029	positive regulation of TOR signaling		none	other localisation	OG0006116	Archaeplastida	NA
EhG3076.1	NA	NA	0.29685	0.00751911	3	3	1.22846	EhG29002	gmst	complete	NAD_binding_10|PF13460.6|4.9e-25,NmrA|PF05368.13|6.7e-08,Epimerase|PF01370.21|0.00014	divinyl chlorophyllide a 8-vinyl-reductase activity	408521	none	other localisation	OG0002743	Archaeplastida	NA
EhG3089.1	NA	NA	0.336014	0.00283987	3	3	1.26226	NA	gmst	complete	Thioredoxin_4|PF13462.6|7.5e-07	NA	2.08601e+17	none	other localisation	OG0006068	Archaeplastida	NA
EhG30931.6	NA	NA	0.20644	0.014652	3	3	1.15384	EhG2722	gmst	complete	Fer4_17|PF13534.6|1.1e-08,Fer4_10|PF13237.6|2.6e-05,Fer2_3|PF13085.6|6.6e-30,Fer4_8|PF13183.6|9.7e-07	3 iron, 4 sulfur cluster binding		none	mitochondrion	OG0002600	Archaeplastida	NA
EhG31043.1	NA	NA	0.407591	0.000481761	3	3	1.32647	EhG38439	gmst	complete	NAD_binding_3|PF03447.16|2.7e-13,Homoserine_dh|PF00742.19|4.9e-54	homoserine dehydrogenase activity		none	other localisation	OG0003768	Archaeplastida	NA
EhG31129.1	NA	NA	0.278222	0.0251921	3	3	1.2127	EhG10868,EhG20964,EhG4576	gmst	5primepartial	NA	NA		none	signal peptide	OG0032805	E_huxleyi	Coccolithophore specific in 1/6 species
EhG31201.1	NA	NA	0.368737	0.0305146	2	2	1.29122	EhG3247	gmst	5primepartial	NA	NA	208880231881	none	other localisation	OG0005859	SAR/Hapista	NA
EhG3123.3	NA	NA	0.338038	0.0379338	3	3	1.26404	EhG29278	gmst	complete	CSD|PF00313.22|1e-11,CSD|PF00313.22|9.7e-13	Cold shock protein domain		none	other localisation	OG0040912	E_huxleyi	Coccolithophore specific in 1/6 species
EhG31246.2	NA	NA	0.520166	0.00198506	3	3	1.43412	EhG3207	gmst	5primepartial	Arf|PF00025.21|1.8e-76,MMR_HSR1|PF01926.23|1.6e-05,SRPRB|PF09439.10|4.4e-11,Gtr1_RagA|PF04670.12|6.6e-10,G-alpha|PF00503.20|2.9e-07,Ras|PF00071.22|9.1e-12,Roc|PF08477.13|3.8e-14	Belongs to the small GTPase superfamily. Arf family		none	other localisation	OG0000041	Archaeplastida	NA
EhG31343.26	NA	NA	0.221211	0.0357722	3	3	1.16571	EhG12801,EhG12866,EhG14038,EhG14198,EhG16686,EhG16688,EhG16690,EhG22924,EhG22926,EhG25090,EhG25091,EhG31365,EhG31828,EhG31831,EhG31846,EhG32569,EhG32571,EhG32885,EhG32922,EhG33915,EhG33917,EhG37221,EhG37223,EhG37832,EhG39191,EhG39192,EhG39193,EhG39383,EhG39385,EhG39386,EhG44043,EhG44044,EhG44045,EhG5778,EhG5781	gmst	complete	Chloroa_b-bind|PF00504.21|1.8e-36	Chlorophyll A-B binding protein	8.73709e+39	none	other localisation	OG0000209	SAR/Hapista	NA
EhG3137.2	NA	NA	0.494714	0.00143991	3	3	1.40904	EhG29291	gmst	complete	Ldh_1_C|PF02866.18|2.6e-44,Ldh_1_N|PF00056.23|6.7e-39	L-malate dehydrogenase activity	2.78233e+41	none	mitochondrion	OG0001135	Archaeplastida	NA
EhG31424.2	NA	NA	0.316994	0.043114	2	2	1.24573	EhG25061	gmst	complete	NYN_YacP|PF05991.11|8.9e-08	NA		none	other localisation	OG0011512	SAR/Hapista	NA
EhG31548.1	NA	NA	0.386737	0.000815685	3	3	1.30743	EhG7560	gmst	complete	FAA_hydrolase|PF01557.18|6.1e-54,GST_C_3|PF14497.6|0.0002,FAA_hydrolase_N|PF09298.11|3.2e-28	fumarylacetoacetase activity	258169124936	none	other localisation	OG0003047	Archaeplastida	NA
EhG31599.4	NA	NA	0.278454	0.0154289	2	2	1.21289	EhG28502	gmst	complete	NA	NA		none	other localisation	OG0006714	SAR/Hapista	NA
EhG31766.1	NA	NA	0.251504	0.0408913	3	3	1.19045	EhG30512	gmst	complete	Thiolase_C|PF02803.18|3.8e-43,Thiolase_N|PF00108.23|6.3e-56	acetyl-CoA C-acyltransferase activity		none	mitochondrion	OG0000419	Archaeplastida	NA
EhG31846.103	Chlorophyll A-B binding protein		0.797974	0.00350042	3	3	1.73866	EhG12801,EhG12846,EhG14038,EhG14198,EhG16686,EhG22924,EhG22926,EhG25090,EhG25091,EhG31343,EhG31344,EhG31362,EhG31365,EhG31828,EhG31831,EhG32569,EhG32571,EhG32885,EhG33915,EhG33916,EhG36769,EhG37221,EhG39191,EhG39193,EhG39383,EhG39384,EhG39386,EhG44045,EhG5778,EhG5781	gmst	complete	Chloroa_b-bind|PF00504.21|4.6e-26	Chlorophyll A-B binding protein		none	other localisation	OG0000032	SAR/Hapista	NA
EhG31892.2	NA	NA	0.213747	0.0105865	3	3	1.1597	EhG14138	gmst	complete	PMSR|PF01625.21|7.7e-57	peptide-methionine (S)-S-oxide reductase activity	8.63093e+22	none	signal peptide	OG0000151	Archaeplastida	NA
EhG31896.1	Pyridine nucleotide-disulphide oxidoreductase	Likely glutathione or mucuric reductase	0.71165	0.0001089	3	3	1.63768	EhG14143	gmst	complete	Pyr_redox_dim|PF02852.22|2.6e-28,Pyr_redox|PF00070.27|1.4e-11,GIDA|PF01134.22|7.7e-06,K_oxygenase|PF13434.6|3.2e-05,Pyr_redox_2|PF07992.14|1.3e-56	dihydrolipoyl dehydrogenase activity	397221	none	other localisation	OG0000257	Archaeplastida	NA
EhG31937.1	NA	NA	0.181834	0.0165542	3	3	1.13433	EhG1079	gmst	complete	Pribosyltran|PF00156.27|4.5e-13	'de novo' UMP biosynthetic process		none	other localisation	OG0006800	Archaeplastida	NA
EhG31986.4	NA	NA	0.280613	0.00630481	3	3	1.21471	EhG1127	gmst	complete	GST_N|PF02798.20|4.1e-06,GST_C_3|PF14497.6|0.00023,GST_N_3|PF13417.6|4.1e-09,GST_N_2|PF13409.6|6.7e-08,GST_C_2|PF13410.6|0.00014	NA		none	other localisation	OG0000965	Archaeplastida	NA
EhG32052.1	NA	NA	0.297555	0.00302695	3	3	1.22906	EhG37106	getorf	complete	NA	Uncharacterized conserved protein (DUF2358)		none	signal peptide	OG0004318	Archaeplastida	NA
EhG32083.4	NA	NA	0.177377	0.0147519	3	3	1.13083	EhG41783	gmst	complete	Thioredoxin|PF00085.20|2.4e-10	cell redox homeostasis	2.36016e+100	none	other localisation	OG0000039	Archaeplastida	NA
EhG32139.1	NA	NA	0.252379	0.0185446	3	3	1.19117	EhG37438	gmst	complete	NA	NA		none	other localisation	OG0001236	Archaeplastida	NA
EhG32184.1	NA	NA	0.270678	0.0134992	3	3	1.20637	EhG42003	getorf	complete	NA	translation initiation factor activity		none	other localisation	OG0003048	Archaeplastida	NA
EhG32228.3	NA	NA	0.846999	7.86527e-05	3	3	1.79876	EhG9411	gmst	complete	NA	NA		none	chloroplast	OG0013508	E_huxleyi	NA
EhG32456.1	NA	NA	0.139772	0.0450186	3	3	1.10173	EhG33363	gmst	complete	NA	NA		none	signal peptide	OG0010525	Phaocystales	NA
EhG32621.2	NA	NA	0.362055	0.00109039	3	3	1.28526	EhG25147	gmst	complete	MORN|PF02493.20|3.5e-05,MORN|PF02493.20|6.9e-06,MORN|PF02493.20|1.8e-07,MORN|PF02493.20|8.2e-06,MORN|PF02493.20|1.1e-05	regulation of ryanodine-sensitive calcium-release channel activity	2.85663e+37	none	other localisation	OG0009504	Haptophyta	NA
EhG32651.1	NA	NA	0.212186	0.0125511	3	3	1.15844	EhG25117	gmst	complete	NA	calcium-transporting ATPase activity		none	other localisation	OG0001780	SAR/Hapista	NA
EhG32915.4	NA	NA	0.243177	0.00571065	3	3	1.1836	EhG25211	getorf	complete	NA	RmlD substrate binding domain		none	other localisation	OG0003658	SAR/Hapista	NA
EhG32919.1	NA	NA	0.13978	0.0498024	3	3	1.10174	EhG25205	gmst	complete	MAPEG|PF01124.18|6.2e-11	succinate transmembrane transporter activity		none	signal anchor	OG0015739	Archaeplastida	NA
EhG33066.3	NA	NA	0.366922	0.00575385	2	2	1.2896	EhG429,EhG430	gmst	complete	EF-hand_1|PF00036.32|8.3e-08,EF-hand_7|PF13499.6|2.8e-14,EF-hand_5|PF13202.6|0.00067,EF-hand_1|PF00036.32|3.8e-07,EF-hand_1|PF00036.32|3.1e-08,EF-hand_7|PF13499.6|4.7e-15,EF-hand_5|PF13202.6|2.9e-05,EF-hand_8|PF13833.6|2.3e-11,EF-hand_8|PF13833.6|8.6e-07,EF-hand_6|PF13405.6|0.00017,EF-hand_5|PF13202.6|0.00041,EF-hand_9|PF14658.6|1.7e-05,EF-hand_9|PF14658.6|0.00069,EF-hand_6|PF13405.6|4.2e-08,EF-h…	Ca2 -binding protein (EF-Hand superfamily		none	other localisation	OG0000008	Archaeplastida	NA
EhG33088.3	CRAL/TRIO domain containing	Lipophilic small molecule binding, TRIO involved in Actin remodelling	1.29593	4.81904e-05	3	3	2.45535	EhG29967,EhG29968	gmst	complete	CRAL_TRIO|PF00650.20|2.9e-15	intermembrane phospholipid transfer	1.95752e+88	none	other localisation	OG0004488	Archaeplastida	NA
EhG33132.2	NA	NA	0.370479	0.0195307	3	3	1.29278	EhG29934	gmst	complete	Ldh_1_N|PF00056.23|2.8e-33,Ldh_1_C|PF02866.18|5.7e-37	L-malate dehydrogenase activity		none	other localisation	OG0001135	Archaeplastida	NA
EhG33191.1	NA	NA	0.200169	0.0372292	3	3	1.14883	EhG23325	gmst	5primepartial	Acyl-CoA_dh_N|PF02771.16|1.1e-28,Acyl-CoA_dh_1|PF00441.24|3.5e-25,Acyl-CoA_dh_2|PF08028.11|3.2e-09,Acyl-CoA_dh_M|PF02770.19|1.9e-16	Acyl-CoA dehydrogenase, N-terminal domain		none	other localisation	OG0000166	Archaeplastida	NA
EhG33356.2	NA	NA	0.128329	0.040487	3	3	1.09303	EhG32462	gmst	complete	Ras|PF00071.22|3.9e-50,Roc|PF08477.13|4.8e-31,Arf|PF00025.21|5.1e-11,Gtr1_RagA|PF04670.12|0.0007	ribosome localization	256553	none	other localisation	OG0001668	Archaeplastida	NA
EhG33398.2	NA	NA	0.256247	0.0401074	2	2	1.19437	EhG32422	getorf	complete	NA	mRNA splicing, via spliceosome		none	other localisation	OG0082093	E_huxleyi	Coccolithophore specific in 1/6 species
EhG33488.1	NA	NA	0.338454	0.00899621	3	3	1.2644	NA	transdec	complete	NA	NA	227764110898	none	other localisation	OG0004563	Phaocystales	NA
EhG33841.1	NA	NA	0.441269	0.00158478	3	3	1.3578	EhG43394	gmst	complete	NmrA|PF05368.13|0.00014,NAD_binding_10|PF13460.6|2.9e-37,Epimerase|PF01370.21|7.1e-05	divinyl chlorophyllide a 8-vinyl-reductase activity	2.83998e+23	none	signal peptide	OG0002262	Archaeplastida	NA
EhG33850.7	NA	NA	0.173002	0.015474	3	3	1.1274	EhG43402	getorf	complete	NA	NA	4.11626e+29	none	signal peptide	OG0000576	Archaeplastida	NA
EhG34015.2	NA	NA	0.360961	0.0464669	2	2	1.28428	EhG39046,EhG942	gmst	complete	DUF1230|PF06799.11|4.1e-23	Protein of unknown function (DUF1230)		none	other localisation	OG0003066	Archaeplastida	NA
EhG34032.1	NA	NA	0.271046	0.015577	2	2	1.20668	NA	gmst	complete	KH_1|PF00013.29|1.7e-10	pre-mRNA branch point binding		none	other localisation	OG0000754	Archaeplastida	NA
EhG34197.3	NA	NA	0.53315	0.000450139	3	3	1.44709	EhG20443	gmst	complete	ACBP|PF00887.19|9.1e-18	NA		none	other localisation	OG0000300	Archaeplastida	NA
EhG34482.3	NA	NA	0.224375	0.00627655	3	3	1.16827	EhG11349	gmst	complete	NA	NA		none	signal peptide	OG0000576	Archaeplastida	NA
EhG34485.1	NA	NA	0.708851	0.00256357	2	2	1.6345	EhG11353	gmst	complete	NA	NA	212582103798	none	signal peptide	OG0004179	Archaeplastida	NA
EhG34602.2	NA	NA	0.183619	0.0252629	3	3	1.13573	EhG4776	gmst	complete	DUF2854|PF11016.8|1.4e-32	Protein of unknown function (DUF2854)		none	chloroplast	OG0003633	Archaeplastida	NA
EhG34707.2	NA	NA	0.299513	0.0387722	2	2	1.23073	EhG15406	gmst	complete	TM2|PF05154.16|1.8e-08	NA	2.05368e+23	none	other localisation	OG0040690	E_huxleyi	NA
EhG34746.1	NA	NA	0.162535	0.0142869	3	3	1.11925	EhG35221	gmst	complete	AIRS_C|PF02769.22|4.4e-14,AIRS_C|PF02769.22|6.1e-18,GATase_5|PF13507.6|4.1e-102,FGAR-AT_N|PF18076.1|1e-16,FGAR-AT_linker|PF18072.1|1.4e-11	CobB/CobQ-like glutamine amidotransferase domain		none	other localisation	OG0001983	Archaeplastida	NA
EhG34775.4	NA	NA	0.148904	0.0317396	3	3	1.10873	EhG35195	gmst	complete	E1_4HB|PF16191.5|1e-19,E1_UFD|PF09358.10|3.2e-33,ThiF|PF00899.21|5.7e-32,ThiF|PF00899.21|8.7e-67,UBA_e1_thiolCys|PF10585.9|5.2e-88,E1_FCCH|PF16190.5|1.2e-29	ubiquitin activating enzyme activity	282497283018	none	other localisation	OG0000313	Archaeplastida	NA
EhG34863.1	NA	NA	0.464942	0.000695971	3	3	1.38026	EhG32536	gmst	complete	Pyr_redox_2|PF07992.14|5.2e-26,NAD_binding_8|PF13450.6|3.6e-08,Fer4_20|PF14691.6|1.8e-21,Pyr_redox|PF00070.27|2.5e-06,HI0933_like|PF03486.14|0.00029	L-glutamate biosynthetic process		none	mitochondrion	OG0000520	Archaeplastida	NA
EhG34973.3	NA	NA	0.130559	0.0357287	3	3	1.09472	EhG13111	gmst	complete	Pyr_redox_2|PF07992.14|6.9e-05,Fer4_9|PF13187.6|0.00019,NAD_binding_8|PF13450.6|6.5e-05,Fer4_7|PF12838.7|0.00068,ETF_QO|PF05187.13|1.2e-45	oxidoreductase activity, oxidizing metal ions with flavin as acceptor	406458357999	none	mitochondrion	OG0002323	Archaeplastida	NA
EhG3508.2	NA	NA	0.1383	0.0408767	3	3	1.10061	EhG12532	gmst	complete	ETF|PF01012.21|1e-34,ETF_alpha|PF00766.19|1.4e-34	fatty acid beta-oxidation using acyl-CoA dehydrogenase		none	other localisation	OG0002259	Archaeplastida	NA
EhG35134.1	NA	NA	0.28377	0.00264345	3	3	1.21737	EhG40605	gmst	complete	EF-hand_7|PF13499.6|0.00044,EF-hand_1|PF00036.32|1.3e-05,EF-hand_8|PF13833.6|9e-05,Iso_dh|PF00180.20|5.3e-18,EF-hand_5|PF13202.6|1.3e-05,EF-hand_6|PF13405.6|2e-05	isocitrate dehydrogenase (NADP+) activity	4.09582e+29	none	mitochondrion	OG0002393	Archaeplastida	NA
EhG35181.1	NA	NA	0.479667	0.00521604	2	2	1.39442	EhG34789	gmst	complete	NA	ACT domain		none	mitochondrion	OG0010457	Archaeplastida	NA
EhG35195.4	Ubiquitin-activating enzyme E1		0.721754	0.00186367	3	3	1.64919	EhG34775	getorf	complete	NA	ubiquitin activating enzyme activity		none	signal peptide	OG0000313	Archaeplastida	NA
EhG35382.1	NA	NA	0.175884	0.0243426	3	3	1.12966	EhG1042	gmst	complete	tRNA-synt_1g|PF09334.11|0.00015,tRNA-synt_1g|PF09334.11|5e-07,tRNA-synt_1_2|PF13603.6|3.3e-07,tRNA-synt_1g|PF09334.11|5.6e-07,Val_tRNA-synt_C|PF10458.9|6.9e-16,tRNA-synt_1|PF00133.22|1.8e-193,Anticodon_1|PF08264.13|9.5e-39	valyl-tRNA aminoacylation		none	chloroplast	OG0000698	Archaeplastida	NA
EhG3546.2	NA	NA	0.195988	0.0464669	3	3	1.14551	EhG12570	gmst	complete	NA	NA		none	other localisation	OG0007902	Archaeplastida	NA
EhG35736.4	NA	NA	0.23075	0.0165425	3	3	1.17344	EhG20674	transdec	complete	ABC_tran|PF00005.27|1.4e-32,ABC_tran|PF00005.27|3.9e-32,ABC_membrane|PF00664.23|4.8e-28,ABC_membrane|PF00664.23|4.3e-35	ATPase activity, coupled to transmembrane movement of substances		none	mitochondrion	OG0000014	Archaeplastida	NA
EhG35787.1	NA	NA	0.513576	0.000291049	3	3	1.42758	EhG40096	gmst	complete	NA	NA	2.13486e+23	none	other localisation	OG0015429	Phaocystales	NA
EhG35795.2	NA	NA	0.277902	0.0140307	3	3	1.21243	NA	gmst	complete	Tubulin|PF00091.25|6.5e-65,Tubulin_C|PF03953.17|1.3e-45	structural constituent of cytoskeleton		none	other localisation	OG0000102	Archaeplastida	NA
EhG3581.1	Cyclophilin type peptidyl-prolyl cis-trans isomerase		0.603777	0.0386253	2	2	1.51969	EhG12603	gmst	complete	Pro_isomerase|PF00160.21|2.3e-33	peptidyl-prolyl cis-trans isomerase activity		none	other localisation	OG0000022	Archaeplastida	NA
EhG3584.1	NA	NA	0.146823	0.0291754	3	3	1.10713	EhG12608	gmst	complete	Pro_isomerase|PF00160.21|1.3e-28,ShK|PF01549.24|3.2e-09	peptidyl-prolyl cis-trans isomerase activity	2.82791e+17	none	signal peptide	OG0002713	Archaeplastida	NA
EhG3607.1	NA	NA	0.300891	0.0129187	3	3	1.2319	EhG12636	gmst	complete	2Fe-2S_thioredx|PF01257.19|2e-48	NADH dehydrogenase (quinone) activity		none	mitochondrion	OG0003280	Archaeplastida	NA
EhG36092.1	NA	NA	0.322615	0.00894593	2	2	1.2506	EhG15436	gmst	5primepartial	Cwf_Cwc_15|PF04889.12|0.00088,SART-1|PF03343.13|6.5e-08,SART-1|PF03343.13|1.2e-19	queuosine biosynthetic process		none	other localisation	OG0002378	Archaeplastida	NA
EhG36093.1	NA	NA	0.427586	0.0034605	3	3	1.34498	EhG15437	gmst	complete	Aha1_N|PF09229.11|4.8e-30	Activator of Hsp90 ATPase	4.04283e+35	none	other localisation	OG0007597	Archaeplastida	NA
EhG3612.2	EF-hand containing protein		0.628596	0.00130704	3	3	1.54606	EhG12641	getorf	complete	NA	EF-hand, calcium binding motif		none	other localisation	OG0001276	Archaeplastida	NA
EhG3616.3	NA	NA	0.471609	0.00109039	3	3	1.38665	EhG12646	gmst	complete	DCP1|PF06058.13|5.6e-38	Dcp1-like decapping family	2.58215e+23	none	other localisation	OG0004147	Archaeplastida	NA
EhG36335.1	NA	NA	0.498766	0.0195344	3	3	1.413	EhG11750,EhG14485,EhG36349,EhG36354	transdec	complete	RCC1|PF00415.18|9.9e-14,RCC1|PF00415.18|5.5e-15,RCC1|PF00415.18|9.3e-15,RCC1|PF00415.18|7.3e-15,RCC1|PF00415.18|6.7e-14,RCC1|PF00415.18|4.6e-07,RCC1_2|PF13540.6|2.9e-07,RCC1_2|PF13540.6|3.8e-09,RCC1_2|PF13540.6|6.2e-10,RCC1_2|PF13540.6|8.2e-08,RCC1_2|PF13540.6|6.9e-07,RCC1_2|PF13540.6|8e-08	guanyl-nucleotide exchange factor activity		none	other localisation	OG0000357	E_huxleyi	Coccolithophore specific in 1/6 species
EhG36429.1	NA	NA	0.303335	0.00881141	3	3	1.23399	EhG38532	gmst	complete	WD40|PF00400.32|4.2e-05,WD40|PF00400.32|0.00028,WD40|PF00400.32|3e-09,PRP4|PF08799.11|1.3e-11	U4 snRNA binding		none	other localisation	OG0002936	Archaeplastida	NA
EhG36541.1	NA	NA	0.337597	0.0177242	3	3	1.26365	EhG9111	gmst	complete	NA	NA		none	signal peptide	OG0041059	Gephyrocapsa	Coccolithophore specific in 2/6 species
EhG36830.2	NA	NA	0.405253	0.000584557	3	3	1.32432	EhG39149	getorf	complete	NA	phosphomannomutase activity	2.75353e+50	none	other localisation	OG0002755	Archaeplastida	NA
EhG36857.1	NA	NA	0.355769	0.00575322	3	3	1.27967	EhG13576	gmst	complete	F420_oxidored|PF03807.17|3.4e-06,NAD_binding_2|PF03446.15|2.9e-35,Shikimate_DH|PF01488.20|4.3e-06,NAD_binding_11|PF14833.6|1.1e-22	3hydroxyisobutyrate dehydrogenase	2.18986e+83	none	other localisation	OG0000438	Archaeplastida	NA
EhG36936.1	Septum formation topological specificity factor MinE		0.621691	0.000290831	3	3	1.53868	EhG24462	gmst	complete	MinE|PF03776.14|2e-13	Prevents the cell division inhibition by proteins MinC and MinD at internal division sites while permitting inhibition at polar sites. This ensures cell division at the proper site by restricting the formation of a division septum at the midpoint of the long axis of the cell	NA	NA	chloroplast	OG0007593	Archaeplastida	NA
EhG36964.1	NA	NA	0.216709	0.0116126	3	3	1.16208	EhG24487	gmst	complete	SUI1|PF01253.22|5.4e-23	translation initiation factor activity	3.63263e+35	none	other localisation	OG0002052	Archaeplastida	NA
EhG36974.3	NA	NA	0.245319	0.0261875	2	2	1.18535	EhG19650	gmst	complete	ETC_C1_NDUFA5|PF04716.14|1.5e-17	respiratory electron transport chain		none	mitochondrion	OG0003817	Archaeplastida	NA
EhG3701.1	NA	NA	0.197444	0.0132413	3	3	1.14666	EhG12730	gmst	complete	Cyt-b5|PF00173.28|3.5e-22	heme binding	1.18525e+41	Defline:cytochrome b5:Mark van der Giezen:2009-09-10	other localisation	OG0000173	Archaeplastida	NA
EhG37055.3	NA	NA	0.383039	0.0444635	3	3	1.30409	EhG12959	gmst	complete	NA	NA		none	other localisation	OG0009482	Phaocystales	NA
EhG37134.1	NA	NA	0.396066	0.0168202	3	3	1.31591	EhG43472	gmst	complete	NA	NA	283600	none	signal peptide	OG0023492	Phaocystales	NA
EhG37258.2	NA	NA	0.155806	0.0196848	3	3	1.11404	NA	gmst	complete	AAA|PF00004.29|5.3e-45,AAA_5|PF07728.14|4e-05,AAA_2|PF07724.14|2e-06,AAA_lid_3|PF17862.1|5e-16,CDC48_2|PF02933.17|2e-10,Vps4_C|PF09336.10|2e-05,AAA|PF00004.29|8.4e-46,AAA_33|PF13671.6|1.4e-05,CDC48_N|PF02359.18|1.7e-23,AAA_lid_3|PF17862.1|2.6e-12,RuvB_N|PF05496.12|9.8e-06,RuvB_N|PF05496.12|2.5e-05	ATP binding	2.80778e+35	none	other localisation	OG0000091	Archaeplastida	NA
EhG37607.1	NA	NA	0.192884	0.032039	3	3	1.14305	EhG6193	gmst	complete	SEP|PF08059.13|6e-24,UBX|PF00789.20|5.2e-11	nuclear envelope reassembly	6.66227e+73	none	other localisation	OG0001044	Archaeplastida	NA
EhG3772.4	Tic22-like family protein		0.847111	0.000482435	2	2	1.79889	NA	gmst	complete	Tic22|PF04278.12|7.7e-08	Tic22-like family		none	mitochondrion	OG0006207	Archaeplastida	NA
EhG37739.1	NA	NA	0.27141	0.0138848	3	3	1.20699	EhG5836	gmst	complete	Acylphosphatase|PF00708.18|0.00011	NA		none	signal peptide	OG0011783	Phaocystales	NA
EhG37742.1	NA	NA	0.178467	0.0477101	3	3	1.13168	EhG5839	gmst	complete	NA	NA		none	chloroplast	OG0023824	E_huxleyi	NA
EhG3784.1	NA	NA	0.459207	0.00546448	2	2	1.37479	NA	gmst	complete	THF_DHG_CYH_C|PF02882.19|2.1e-67,THF_DHG_CYH|PF00763.23|1e-39	methenyltetrahydrofolate cyclohydrolase activity		none	signal peptide	OG0000827	Archaeplastida	NA
EhG3791.2	Metallopeptidase family M24	Possible methionine aminopeptidase	0.674284	0.000108951	3	3	1.5958	NA	gmst	complete	Peptidase_M24|PF00557.24|1.4e-23	Proliferation-associated protein	2.76238e+41	none	other localisation	OG0001846	Archaeplastida	NA
EhG37920.1	NA	NA	0.378124	0.011244	2	2	1.29965	EhG5855	gmst	complete	Mito_carr|PF00153.27|2.9e-10,Mito_carr|PF00153.27|1.8e-05,Mito_carr|PF00153.27|8.3e-11	S-adenosyl-L-methionine transmembrane transport	2.78581e+65	none	signal peptide	OG0003269	Archaeplastida	NA
EhG37998.2	NA	NA	0.201206	0.00923006	3	3	1.14966	EhG10391	gmst	complete	Cpn10|PF00166.21|5.7e-30	chaperone cofactor-dependent protein refolding	2.0961e+95	Defline:Mitochondrial Cpn10:Bryony Williams:2009-09-10	other localisation	OG0000821	Archaeplastida	NA
EhG38154.1	NA	NA	0.166745	0.0324403	3	3	1.12252	NA	gmst	5primepartial	FR47|PF08445.10|1.7e-05,Acetyltransf_1|PF00583.25|4.1e-16,Acetyltransf_7|PF13508.7|3e-10,Acetyltransf_10|PF13673.7|6.4e-11	peptide alpha-N-acetyltransferase activity		none	signal peptide	OG0001113	Archaeplastida	NA
EhG38260.1	NA	NA	0.803218	9.94349e-05	3	3	1.74499	EhG17347	gmst	complete	NA	NA		none	other localisation	OG0009525	Haptophyta	NA
EhG38265.1	NA	NA	0.340185	0.00750671	2	2	1.26592	NA	transdec	complete	NA	NA		none	signal peptide	OG0001238	Archaeplastida	NA
EhG38315.2	NA	NA	0.46073	0.00156938	3	3	1.37624	EhG17298	gmst	complete	Peptidase_C1|PF00112.23|7.4e-54	transferase activity, transferring glycosyl groups		none	other localisation	OG0000488	Archaeplastida	NA
EhG38369.1	NA	NA	0.325183	0.0349097	3	3	1.25282	EhG38322,EhG38324	gmst	complete	Tubulin|PF00091.25|7.7e-39,FtsZ_C|PF12327.8|3.2e-28	chloroplast fission		none	signal peptide	OG0000758	Archaeplastida	NA
EhG38410.3	NA	NA	0.24372	0.0105823	3	3	1.18404	EhG38363	gmst	complete	PA28_beta|PF02252.18|3.1e-15,PA28_beta|PF02252.18|5e-07	endopeptidase activator activity		none	other localisation	OG0002789	Archaeplastida	NA
EhG38418.1	NA	NA	0.501811	0.000584557	3	3	1.41599	EhG31064	gmst	complete	TPR_9|PF13371.6|2.6e-05,FKBP_C|PF00254.28|1.6e-28,TPR_16|PF13432.6|0.00031	FK506 binding	2.05647e+130	none	other localisation	OG0000021	Archaeplastida	NA
EhG38457.1	NA	NA	0.138068	0.0456489	3	3	1.10043	EhG31028	gmst	complete	Aldedh|PF00171.22|1e-164	aldehyde dehydrogenase (NAD) activity		none	mitochondrion	OG0000066	Archaeplastida	NA
EhG38721.2	NA	NA	0.129913	0.0295923	3	3	1.09423	EhG38183	gmst	complete	HMG_CoA_synt_C|PF08540.10|6.3e-51,HMG_CoA_synt_N|PF01154.17|1.3e-73	hydroxymethylglutaryl-CoA synthase activity		none	other localisation	OG0001274	Archaeplastida	NA
EhG3876.5	NA	NA	0.795455	0.00423468	3	3	1.73562	EhG29224	gmst	complete	NA	NA		none	signal peptide	OG0004327	Archaeplastida	NA
EhG38760.1	NA	NA	0.671488	0.00456284	2	2	1.59271	EhG29393	gmst	complete	NA	NA	117188118902	none	other localisation	OG0054808	E_huxleyi	NA
EhG3877.1	NA	NA	0.334058	0.00513615	3	3	1.26055	EhG29225	gmst	complete	PCI|PF01399.27|8.7e-12,eIF3_N|PF09440.10|1.1e-34	translation initiation factor activity		none	other localisation	OG0002908	Archaeplastida	NA
EhG38774.6	NA	NA	0.190483	0.00700103	3	3	1.14115	EhG29375,EhG29377	gmst	complete	Aminotran_1_2|PF00155.21|6.6e-33	transferase activity, transferring nitrogenous groups		none	other localisation	OG0003371	Archaeplastida	NA
EhG38807.1	NA	NA	0.130847	0.0301058	3	3	1.09494	EhG44700	gmst	complete	MreB_Mbl|PF06723.13|1.8e-10,HSP70|PF00012.20|8.5e-269	unfolded protein binding		none	mitochondrion	OG0000031	Archaeplastida	NA
EhG38832.5	NA	NA	0.272599	0.00305933	3	3	1.20798	EhG14075	gmst	complete	ATP-grasp_2|PF08442.10|5.8e-15,ATP-grasp_2|PF08442.10|7.6e-32,Ligase_CoA|PF00549.19|3.2e-21,ATP-grasp_5|PF13549.6|0.00059	succinate-CoA ligase (ADP-forming) activity		none	mitochondrion	OG0002066	Archaeplastida	NA
EhG38873.4	NA	NA	0.284568	0.0196848	2	2	1.21805	EhG14037	gmst	complete	UQ_con|PF00179.26|4.6e-40	NEDD8 transferase activity	2.7863e+74	none	other localisation	OG0001669	Archaeplastida	NA
EhG38874.5	NA	NA	0.148659	0.027233	3	3	1.10854	EhG14036	gmst	complete	Thioredoxin|PF00085.20|3.7e-09	intramolecular oxidoreductase activity, transposing S-S bonds		none	other localisation	OG0000039	Archaeplastida	NA
EhG38903.5	NA	NA	0.4452	0.00322161	3	3	1.3615	EhG21194	gmst	complete	NA	NA		none	other localisation	OG0004560	Archaeplastida	NA
EhG3898.3	NA	NA	0.135482	0.0248332	3	3	1.09846	EhG29245	gmst	complete	eRF1_1|PF03463.15|3.6e-19,baeRF_family10|PF18854.1|2.8e-06,eRF1_3|PF03465.15|3.3e-36,acVLRF1|PF18859.1|3.4e-08,eRF1_2|PF03464.15|7.3e-41	translation release factor activity		none	other localisation	OG0002225	Archaeplastida	NA
EhG39067.6	NA	NA	0.305204	0.00116132	3	3	1.23559	EhG42098	gmst	complete	PSII_Pbs27|PF13326.6|5.5e-28	Photosystem II Pbs27	278760	none	signal peptide	OG0004005	Archaeplastida	NA
EhG39081.1	NA	NA	2.25376	0.000117913	3	3	4.76925	EhG42112	gmst	complete	NA	NA		none	other localisation	OG0027698	E_huxleyi	NA
EhG39086.1	NA	NA	0.549956	0.00156632	3	3	1.46404	NA	gmst	complete	NA	NA		none	signal peptide	OG0007007	Phaocystales	NA
EhG3909.1	NA	NA	0.304916	0.0256008	3	3	1.23535	EhG29254	gmst	complete	NA	NA	2.76283e+53	none	signal peptide	OG0003199	Archaeplastida	NA
EhG39267.1	NA	NA	0.234314	0.0323614	3	3	1.17635	NA	gmst	5primepartial	Ank_5|PF13857.6|0.00012,Ank_2|PF12796.7|8.1e-10,Ank_2|PF12796.7|3.3e-13,Ank_4|PF13637.6|3.3e-06,Ank_2|PF12796.7|1e-07	response to abiotic stimulus		none	other localisation	OG0008596	Phaocystales	NA
EhG39320.1	NA	NA	0.360472	0.0162257	2	2	1.28385	EhG24691	getorf	complete	NA	Chlorophyll A-B binding protein	2.2264e+182	Name:Lhcf36:Stephane Lefebvre:2008-12-04 Name:Lhcf36_2:Stephane Lefebvre:2012-05-18 Description:Light harvesting chlorophyll a/c binding protein. Part of LI818 & LI818-like group. Chloroplast localised.:Stephane Lefebvre:2008-12-04 Model Notes:No issues:Stephane Lefebvre:2008-12-04 Defline:Light harvesting protein:Stephane Lefebvre:2008-12-04 Disposition:Catalog:Stephane Lefebvre:2008-12-04 EST e…	mitochondrion	OG0000105	Archaeplastida	NA
EhG39520.1	NA	NA	0.120803	0.0404463	3	3	1.08734	EhG23103	getorf	complete	NA	Aspartate aminotransferase		none	other localisation	OG0000494	Archaeplastida	NA
EhG39655.2	NA	NA	0.300593	0.00380445	3	3	1.23165	EhG7493	gmst	complete	NA	isoform X1	2.16106e+35	none	signal peptide	OG0005159	Archaeplastida	NA
EhG39682.2	NA	NA	0.406113	0.0066354	3	3	1.32511	EhG7517	gmst	complete	CKS|PF01111.19|5.8e-25	cyclin-dependent protein serine/threonine kinase activator activity	4.96165e+71	Name:CKS:Herve Moreau:2008-08-01 Description:Core cell cycle gene. CDK subunit CKS:Herve Moreau:2008-08-01 Literature:Robbens S.	other localisation	OG0003637	Archaeplastida	NA
EhG39696.1	NA	NA	0.236488	0.00617946	3	3	1.17812	EhG39630,EhG39631	transdec	complete	Rotamase|PF00639.21|8.8e-12,Rotamase_3|PF13616.6|7.7e-10	PPIC-type PPIASE domain	2.37441e+22	none	signal peptide	OG0000453	Archaeplastida	NA
EhG39798.1	NA	NA	0.197513	0.0142869	3	3	1.14672	EhG33869	gmst	complete	Pinin_SDK_memA|PF04696.13|2e-18	NA		none	other localisation	OG0009294	SAR/Hapista	NA
EhG40001.1	NA	NA	0.338803	0.00150642	3	3	1.26471	EhG11116,EhG42792	gmst	complete	Fumerase|PF05681.14|1.4e-84,Fumerase_C|PF05683.12|7e-88	Fumarase C-terminus	2.80112e+23	none	mitochondrion	OG0003423	Archaeplastida	NA
EhG40188.4	NA	NA	0.252503	0.00630481	3	3	1.19127	EhG44353	gmst	complete	Peptidase_S9_N|PF02897.15|2.5e-48,Peptidase_S9|PF00326.21|4.1e-51	serine-type exopeptidase activity	3.6823e+23	none	other localisation	OG0000778	Archaeplastida	NA
EhG40213.4	NA	NA	0.210435	0.0108043	3	3	1.15704	EhG42960	getorf	complete	NA	protein refolding		none	chloroplast	OG0000318	Archaeplastida	NA
EhG40281.1	NA	NA	0.189319	0.0248241	3	3	1.14022	EhG26220	gmst	complete	PSII_Pbs31|PF18240.1|1.5e-32	NA		none	chloroplast	OG0003579	Archaeplastida	NA
EhG40448.5	NA	NA	0.224441	0.00502889	3	3	1.16832	EhG40764	gmst	complete	PYC_OADA|PF02436.18|1.4e-62,ATP-grasp_3|PF02655.14|0.00031,Dala_Dala_lig_C|PF07478.13|5.2e-08,Biotin_lipoyl|PF00364.22|7.4e-20,Biotin_carb_C|PF02785.19|9e-32,Biotin_carb_N|PF00289.22|5.2e-36,HMGL-like|PF00682.19|2.5e-23,CPSase_L_D2|PF02786.17|2.6e-74,ATP-grasp|PF02222.22|1.5e-05	Biotin carboxylase C-terminal domain		none	signal peptide	OG0000172	Archaeplastida	NA
EhG40487.1	NA	NA	0.245596	0.00378619	3	3	1.18558	EhG42118,EhG42119	gmst	complete	NA	NA		none	signal peptide	OG0054440	E_huxleyi	Coccolithophore specific in 1/6 species
EhG40687.7	NA	NA	0.209738	0.0113038	3	3	1.15648	EhG12915	gmst	complete	Ldh_1_N|PF00056.23|1.5e-33,Ldh_1_C|PF02866.18|2.6e-36	L-malate dehydrogenase activity	27611086558	none	other localisation	OG0001135	Archaeplastida	NA
EhG40748.2	NA	NA	0.122085	0.0392499	3	3	1.08831	EhG36573	gmst	complete	Sigma54_activat|PF00158.26|2.3e-07,AAA|PF00004.29|2.6e-10,Clp_N|PF02861.20|1e-07,AAA_lid_9|PF17871.1|5.8e-32,AAA_5|PF07728.14|1.6e-12,AAA|PF00004.29|1.2e-13,ClpB_D2-small|PF10431.9|3.6e-21,AAA_16|PF13191.6|7.3e-05,AAA_2|PF07724.14|1.4e-52	ATP binding		none	signal peptide	OG0000134	Archaeplastida	NA
EhG40761.32	Chlorophyll A-B binding protein		0.982331	0.000200077	3	3	1.97565	EhG40451	gmst	5primepartial	Chloroa_b-bind|PF00504.21|4.8e-14,Chloroa_b-bind|PF00504.21|1.2e-09	Chlorophyll A-B binding protein		none	other localisation	OG0005039	E_huxleyi	Coccolithophore specific in 1/6 species
EhG40764.2	NA	NA	0.223127	0.00568817	3	3	1.16726	EhG40448	gmst	complete	PYC_OADA|PF02436.18|1.8e-62,Dala_Dala_lig_C|PF07478.13|5.2e-08,HMGL-like|PF00682.19|2.5e-23,Biotin_carb_C|PF02785.19|5.6e-32,Biotin_lipoyl|PF00364.22|7.4e-20,Biotin_carb_N|PF00289.22|5.2e-36,CPSase_L_D2|PF02786.17|2.6e-74,ATP-grasp|PF02222.22|1.5e-05,ATP-grasp_3|PF02655.14|0.00031	Biotin carboxylase C-terminal domain		none	signal peptide	OG0000172	Archaeplastida	NA
EhG40768.1	NA	NA	0.386618	0.000992569	3	3	1.30733	EhG40447	gmst	complete	GST_C_3|PF14497.6|2.8e-10,GST_C_2|PF13410.6|7.3e-05,GST_N|PF02798.20|0.00029	glutathione transferase activity	2.83204e+17	none	other localisation	OG0000817	Archaeplastida	NA
EhG40810.2	NA	NA	0.269797	0.00342616	3	3	1.20564	EhG36471	getorf	complete	NA	metalloendopeptidase activity		none	other localisation	OG0000067	Archaeplastida	NA
EhG40827.2	NA	NA	0.284107	0.0175405	3	3	1.21766	EhG10356	getorf	complete	NA	GTPase activity		none	other localisation	OG0000071	Archaeplastida	NA
EhG40881.1	NA	NA	0.208193	0.0126445	3	3	1.15524	EhG6852	gmst	complete	Ketoacyl-synt_C|PF02801.22|4.1e-35,ketoacyl-synt|PF00109.26|6.4e-52	3-oxoacyl-[acyl-carrier-protein] synthase activity		none	signal peptide	OG0000409	Archaeplastida	NA
EhG40967.2	NA	NA	0.25207	0.00337166	3	3	1.19091	EhG27805	gmst	complete	MM_CoA_mutase|PF01642.22|1.9e-232,B12-binding|PF02310.19|2.9e-13	methylmalonyl-CoA mutase activity	8.87753e+16	none	mitochondrion	OG0002226	Archaeplastida	NA
EhG41126.1	NA	NA	0.325861	0.00885726	3	3	1.25341	EhG44639	gmst	complete	NA	NA	2.07262e+71	none	signal peptide	OG0015688	Prymnesiales	NA
EhG41334.1	NA	NA	0.278251	0.0349097	3	3	1.21272	EhG27666	gmst	complete	NA	NA	2.74571e+17	none	signal peptide	OG0009541	Phaocystales	NA
EhG41387.1	NA	NA	0.275626	0.0352874	2	2	1.21052	EhG21168	gmst	complete	AAA_lid_3|PF17862.1|3.6e-08,TIP49|PF06068.13|0.00085,AAA|PF00004.29|6e-43,Peptidase_M41|PF01434.18|5.6e-58	metalloendopeptidase activity		none	other localisation	OG0000067	Archaeplastida	NA
EhG41459.3	NA	NA	0.185404	0.0312097	3	3	1.13714	EhG13665	gmst	complete	Proteasome_A_N|PF10584.9|1.1e-13,Proteasome|PF00227.26|3.6e-43	The proteasome is a multicatalytic proteinase complex which is characterized by its ability to cleave peptides with Arg, Phe, Tyr, Leu, and Glu adjacent to the leaving group at neutral or slightly basic pH		none	other localisation	OG0003139	Archaeplastida	NA
EhG41482.2	NA	NA	0.474251	0.047529	2	2	1.3892	EhG13640,EhG13641	gmst	complete	ADH_zinc_N_2|PF13602.6|2e-08,ADH_N|PF08240.12|0.00011,NAD_binding_10|PF13460.6|1.1e-08,NmrA|PF05368.13|1.6e-07,ADH_zinc_N|PF00107.26|6.9e-20	13-prostaglandin reductase activity		none	signal peptide	OG0032557	E_huxleyi	NA
EhG41541.1	NA	NA	0.433907	0.000919859	3	3	1.35089	EhG2853	gmst	5primepartial	FKBP_C|PF00254.28|8.6e-18	histone peptidyl-prolyl isomerization	2392276123774310	none	other localisation	OG0006425	Archaeplastida	NA
EhG41608.1	NA	NA	0.52197	0.000360573	3	3	1.43591	EhG7345	gmst	complete	potato_inhibit|PF00280.18|6.3e-18	NA	357028	none	other localisation	OG0003119	Archaeplastida	NA
EhG41966.1	NA	NA	0.506349	0.00124182	3	3	1.42045	EhG31809	gmst	complete	Rotamase_3|PF13616.6|4.5e-16,Rotamase|PF00639.21|5.7e-14	peptidylprolyl isomerase	4.87395e+47	none	signal peptide	OG0000453	Archaeplastida	NA
EhG42115.1	NA	NA	0.301436	0.0131531	3	3	1.23237	EhG18125,EhG18126,EhG42114	getorf	complete	NA	protein deneddylation	404713354695	none	other localisation	OG0003443	Archaeplastida	NA
EhG4213.5	NA	NA	0.148845	0.0277997	3	3	1.10868	EhG5017	gmst	complete	Ribul_P_3_epim|PF00834.19|9.4e-88	ribulose-phosphate 3-epimerase activity	2.80302e+141	none	signal peptide	OG0000630	Archaeplastida	NA
EhG42175.3	NA	NA	0.145287	0.0238305	3	3	1.10595	EhG9964	gmst	complete	Pyr_redox_2|PF07992.14|1e-64,FAD_oxidored|PF12831.7|1.2e-06,Pyr_redox|PF00070.27|1.2e-17,Pyr_redox_dim|PF02852.22|9.8e-36,GIDA|PF01134.22|3e-07	dihydrolipoyl dehydrogenase activity	2.82627e+34	none	mitochondrion	OG0000257	Archaeplastida	NA
EhG42194.1	NA	NA	0.245314	0.0318558	3	3	1.18535	EhG9984	gmst	complete	RRM_1|PF00076.22|1.6e-17	peptidyl-prolyl cis-trans isomerase activity	4.86465e+59	none	other localisation	OG0000095	Archaeplastida	NA
EhG4220.1	NA	NA	0.128605	0.040487	3	3	1.09324	EhG5012	gmst	complete	Calreticulin|PF00262.18|5.5e-146	unfolded protein binding	255220123806	none	other localisation	OG0001851	Archaeplastida	NA
EhG42250.3	NA	NA	0.246517	0.0208333	3	3	1.18634	EhG37904	getorf	complete	NA	aspartic-type endopeptidase activity		none	other localisation	OG0000122	Archaeplastida	NA
EhG42253.2	NA	NA	0.25934	0.00857549	3	3	1.19693	NA	gmst	complete	Acyl-CoA_dh_M|PF02770.19|7.9e-06	acyl-CoA oxidase activity	2.71559e+23	none	mitochondrion	OG0002246	Archaeplastida	NA
EhG424.1	NA	NA	0.178154	0.0392952	3	3	1.13144	EhG33061	getorf	complete	NA	glutathione transferase activity	2.75956e+29	none	other localisation	OG0000307	Archaeplastida	NA
EhG42400.4	NA	NA	0.279052	0.00375609	3	3	1.2134	EhG36653	gmst	complete	NA	pre-mRNA-processing factor		none	other localisation	OG0001750	Archaeplastida	NA
EhG42517.1	NA	NA	0.411044	0.00623175	3	3	1.32965	EhG20562	gmst	complete	FMN_dh|PF01070.18|9.7e-09,NMO|PF03060.15|1.3e-18	Nitronate monooxygenase		none	signal peptide	OG0006852	SAR/Hapista	NA
EhG4253.7	NA	NA	0.365634	0.0103895	3	3	1.28845	EhG32360	gmst	complete	NA	NA	2.70488e+107	none	signal peptide	OG0000200	SAR/Hapista	NA
EhG42645.2	EF-hand containing protein		1.4097	0.000431299	2	2	2.65682	NA	gmst	complete	NA	NA	207002	none	signal peptide	OG0031626	Calcihaptophyta	Coccolithophore specific in 3/6 species
EhG42897.30	NA	NA	0.386574	0.0204437	3	3	1.30728	EhG25310	gmst	5primepartial	Chloroa_b-bind|PF00504.21|3e-10	Chlorophyll A-B binding protein		none	other localisation	OG0013522	E_huxleyi	Coccolithophore specific in 1/6 species
EhG43099.1	NA	NA	0.134565	0.0311632	3	3	1.09776	EhG27964	gmst	complete	TIM|PF00121.18|7.5e-88	triosephosphate isomerase	2.18532e+158	Name:TIM:Thomas Mock:2008-07-26 Description:Triosephosphate isomerase (TIM) is a glycolytic enzyme that catalyzes the interconversion of dihydroxyacetone phosphate and D-glyceraldehyde-3-phosphate. The reaction is very efficient and requires neither cofactors nor metal ions. TIM	other localisation	OG0000472	Archaeplastida	NA
EhG43442.1	NA	NA	0.298813	0.00546591	3	3	1.23013	EhG5660	gmst	complete	PP2C|PF00481.21|3.3e-68	manganese ion binding		none	other localisation	OG0000028	Archaeplastida	NA
EhG43489.2	NA	NA	0.40934	0.00584162	3	3	1.32808	EhG21757	gmst	complete	GST_N|PF02798.20|4.3e-10,GST_C_3|PF14497.6|2.5e-10	glutathione transferase activity	2.15849e+104	none	signal peptide	OG0002307	Archaeplastida	NA
EhG43609.1	NA	NA	0.143079	0.0406487	3	3	1.10426	EhG7204	gmst	complete	GATase|PF00117.28|6.3e-36,tRNA_Me_trans|PF03054.16|8.9e-06,QueC|PF06508.13|0.00037,Peptidase_C26|PF07722.13|9.4e-15,NAD_synthase|PF02540.17|9.1e-07,GMP_synt_C|PF00958.22|0.00011,GMP_synt_C|PF00958.22|2.7e-13	GMP synthase (glutamine-hydrolyzing) activity		none	other localisation	OG0003000	Archaeplastida	NA
EhG43626.1	Cytochrome b5-like Heme binding protein		0.701545	0.020723	2	2	1.62625	EhG7537	gmst	complete	Oxidored_molyb|PF00174.19|3.3e-10,Cyt-b5|PF00173.28|5.5e-12,Mo-co_dimer|PF03404.16|9.6e-37,Oxidored_molyb|PF00174.19|1e-23	sulfite oxidase activity		none	signal peptide	OG0001711	Archaeplastida	NA
EhG43813.1	Cyclophilin type peptidyl-prolyl cis-trans isomerase		0.749211	0.00181226	3	3	1.68087	EhG30822	gmst	complete	Pro_isomerase|PF00160.21|7.5e-20	peptidyl-prolyl cis-trans isomerase activity	2.28201e+65	none	other localisation	OG0009265	Archaeplastida	NA
EhG43815.2	NA	NA	0.223348	0.00709952	3	3	1.16744	EhG30819	gmst	complete	DnaJ|PF00226.31|1.4e-20,DnaJ_C|PF01556.18|3.1e-34	heat shock protein binding		none	signal peptide	OG0000284	Archaeplastida	NA
EhG43831.3	NA	NA	0.30092	0.00190863	3	3	1.23193	EhG44539	gmst	complete	NA	NA	279542	none	signal peptide	OG0007934	Haptophyta	NA
EhG43945.1	NA	NA	0.21105	0.00895378	3	3	1.15753	EhG817	gmst	complete	Arg_tRNA_synt_N|PF03485.16|1.8e-20,tRNA-synt_1d|PF00750.19|3.4e-122,DALR_1|PF05746.15|9.6e-29	arginyl-tRNA aminoacylation		none	signal peptide	OG0000997	Archaeplastida	NA
EhG43977.1	NA	NA	0.547542	0.0109793	2	2	1.46159	EhG37226	gmst	complete	DapB_N|PF01113.20|4.8e-12,DapB_C|PF05173.14|1.7e-17	4-hydroxy-tetrahydrodipicolinate reductase	2.21688e+41	none	signal peptide	OG0004966	Archaeplastida	NA
EhG4399.2	NA	NA	0.286595	0.0423997	3	3	1.21976	NA	gmst	complete	VWA_2|PF13519.6|4e-05	von Willebrand factor (vWF) type A domain	2.47296e+59	none	signal peptide	OG0010575	Prymnesiales	NA
EhG44101.1	NA	NA	0.756312	0.000157244	3	3	1.68917	EhG26449,EhG36555,EhG9122	gmst	complete	NA	NA	2.02643e+47	none	signal peptide	OG0009052	Phaocystales	NA
EhG44138.1	NA	NA	0.268675	0.00380179	3	3	1.2047	EhG17953,EhG34088	gmst	complete	Thioredoxin|PF00085.20|2.2e-08	cell redox homeostasis		none	other localisation	OG0000039	Archaeplastida	NA
EhG44190.1	NA	NA	0.242825	0.00378619	3	3	1.18331	EhG42794	gmst	complete	Pyr_redox_dim|PF02852.22|2.7e-29,FAD_binding_2|PF00890.24|2.1e-05,Pyr_redox_3|PF13738.6|6.4e-07,Pyr_redox|PF00070.27|3.6e-14,Pyr_redox_2|PF07992.14|6.9e-56	thioredoxin-disulfide reductase activity	2.80719e+50	none	other localisation	OG0000285	Archaeplastida	NA
EhG44245.7	NA	NA	0.359517	0.00146328	3	3	1.283	EhG24402	gmst	complete	Spermine_synt_N|PF17284.2|3.5e-08,Spermine_synth|PF01564.17|9.7e-39,Methyltransf_25|PF13649.6|9e-05	spermidine synthase activity		none	other localisation	OG0000715	Archaeplastida	NA
EhG44287.2	NA	NA	0.310686	0.00124661	3	3	1.2403	NA	gmst	complete	Peptidase_M17|PF00883.21|1.3e-42,Peptidase_M17_N|PF02789.17|2.2e-17,Peptidase_M17|PF00883.21|1.2e-60	manganese ion binding		none	signal peptide	OG0001329	Archaeplastida	NA
EhG44333.2	NA	NA	0.378829	0.0308332	3	3	1.30029	EhG30772	gmst	complete	NA	NA		none	other localisation	OG0007675	E_huxleyi	NA
EhG44345.4	NA	NA	0.523766	0.0128643	3	3	1.4377	EhG40181	gmst	complete	UQ_con|PF00179.26|9.9e-26,UQ_con|PF00179.26|1.1e-19	protein modification by small protein conjugation		none	other localisation	OG0000400	Archaeplastida	NA
EhG4443.3	NA	NA	0.829693	0.00439362	2	2	1.77731	EhG10999	gmst	complete	NA	NA		none	signal peptide	OG0011953	Isochrysidales	NA
EhG44511.2	NA	NA	0.256585	0.0055923	3	3	1.19465	EhG44367	gmst	complete	Mago_nashi|PF02792.14|3.2e-40,Mago_nashi|PF02792.14|6.6e-28	mRNA transport		none	other localisation	OG0003783	Archaeplastida	NA
EhG44537.1	NA	NA	0.253027	0.00512858	3	3	1.19171	EhG43108,EhG43832	gmst	complete	Aconitase|PF00330.20|9e-41,Aconitase_B_N|PF11791.8|2.4e-60,Aconitase_2_N|PF06434.13|2.2e-85	Aconitate B N-terminal domain	26577779266	none	other localisation	OG0001937	Archaeplastida	NA
EhG44570.1	NA	NA	0.216243	0.0295467	3	3	1.1617	NA	gmst	complete	SOUL|PF04832.12|1.5e-23	NA		none	signal peptide	OG0000662	Archaeplastida	NA
EhG44708.1	NA	NA	0.25395	0.00378933	3	3	1.19247	EhG24407	gmst	complete	NA	NA		none	signal peptide	OG0006699	Archaeplastida	NA
EhG4494.1	NA	NA	0.587289	0.00105817	3	3	1.50242	EhG10945	gmst	complete	NA	NA	280506	none	signal peptide	OG0011768	Phaocystales	NA
EhG490.1	NA	NA	0.475084	0.000253397	3	3	1.39	EhG18008	gmst	complete	Rotamase_2|PF13145.6|8.8e-06,Rotamase|PF00639.21|2.2e-19,Rotamase_3|PF13616.6|2.4e-14	PPIC-type PPIASE domain		none	signal peptide	OG0000453	Archaeplastida	NA
EhG4905.1	NA	NA	0.277254	0.019956	2	2	1.21189	EhG20169,EhG20170	gmst	complete	Siah-Interact_N|PF09032.11|0.00065	NA		none	signal anchor	OG0005791	Haptophyta	NA
EhG4937.1	NA	NA	0.197077	0.0169705	3	3	1.14637	NA	gmst	complete	PurK_C|PF17769.1|3.4e-16,ATP-grasp|PF02222.22|1.4e-52,AIRC|PF00731.20|8e-65	phosphoribosylaminoimidazole carboxylase activity		none	other localisation	OG0003128	Archaeplastida	NA
EhG4953.1	NA	NA	0.214238	0.0147519	3	3	1.16009	NA	gmst	complete	Paf67|PF10255.9|1.4e-133	translation initiation factor activity		none	other localisation	OG0002460	Archaeplastida	NA
EhG4959.2	NA	NA	0.501578	0.00194214	3	3	1.41576	NA	gmst	complete	GDA1_CD39|PF01150.17|1.3e-73	nucleoside-diphosphatase activity		none	signal peptide	OG0000521	Archaeplastida	NA
EhG4963.1	NA	NA	0.164874	0.0398827	3	3	1.12107	NA	gmst	complete	DnaJ|PF00226.31|2.5e-16,Sec63|PF02889.16|1e-05,Sec63|PF02889.16|1.7e-25	posttranslational protein targeting to membrane, translocation		none	signal anchor	OG0002934	Archaeplastida	NA
EhG4981.3	NA	NA	0.519925	0.000307719	3	3	1.43388	NA	gmst	complete	Cpn60_TCP1|PF00118.24|4.7e-86	protein refolding		none	signal peptide	OG0000318	Archaeplastida	NA
EhG4984.1	Proliferating cell nuclear antigen		1.24387	0.00012413	3	3	2.36832	NA	gmst	complete	PCNA_C|PF02747.15|6.6e-54,PCNA_N|PF00705.18|3.1e-54,Rad9|PF04139.13|1.2e-06	DNA polymerase processivity factor activity		none	other localisation	OG0002438	Archaeplastida	NA
EhG4986.1	NA	NA	0.251558	0.00256357	3	3	1.19049	NA	getorf	complete	NA	threonine-type endopeptidase activity	2.83124e+126	none	other localisation	OG0002446	Archaeplastida	NA
EhG4994.1	NA	NA	0.548441	0.000543993	3	3	1.4625	NA	gmst	complete	HopJ|PF08888.11|1.1e-31	HopJ type III effector protein		none	other localisation	OG0006604	SAR/Hapista	NA
EhG5002.1	NA	NA	0.320967	0.00505016	3	3	1.24917	NA	gmst	complete	Asn_synthase|PF00733.21|1.1e-48,GATase_6|PF13522.6|6.3e-26,NAD_synthase|PF02540.17|1e-05,GATase_7|PF13537.6|3.8e-31,HAD|PF12710.7|2.4e-12,Asn_synthase|PF00733.21|3.6e-25,Hydrolase|PF00702.26|1.7e-13	L-asparagine biosynthetic process	5.53736e+31	none	signal peptide	OG0002452	Archaeplastida	NA
EhG5006.1	Pyridoxal-phosphate dependent enzyme		1.12972	0.00012413	3	3	2.18816	NA	gmst	complete	PALP|PF00291.25|1.8e-49	D-cysteine catabolic process	2.84943e+68	none	other localisation	OG0002619	Archaeplastida	NA
EhG5036.1	NA	NA	0.25025	0.0283231	3	3	1.18941	EhG4202	gmst	complete	Proteasome|PF00227.26|2.9e-50,Proteasome_A_N|PF10584.9|3.6e-11	threonine-type endopeptidase activity		none	other localisation	OG0002514	Archaeplastida	NA
EhG5048.2	NA	NA	0.266999	0.00423981	3	3	1.2033	EhG1380,EhG29777,EhG44202	transdec	complete	zf_CCCH_4|PF18345.1|3e-05,zf-CCCH_4|PF18044.1|5.1e-05,zf-CCCH|PF00642.24|0.00067	Cold shock protein domain		none	other localisation	OG0009594	Gephyrocapsa	Coccolithophore specific in 2/6 species
EhG5099.1	NA	NA	0.125294	0.0458434	3	3	1.09073	EhG4127,EhG4128	gmst	complete	NA	NA	2.15697e+16	none	mitochondrion	OG0010496	Phaocystales	NA
EhG5214.3	NA	NA	0.301327	0.00194214	3	3	1.23228	EhG4022	getorf	complete	NA	NA	2.25399e+47	none	other localisation	OG0000200	SAR/Hapista	NA
EhG5395.1	NA	NA	0.223101	0.00945419	3	3	1.16724	EhG28224	getorf	complete	NA	NA	2.8551e+29	none	signal peptide	OG0008613	Phaocystales	NA
EhG5470.4	NA	NA	0.272469	0.00199777	3	3	1.20787	EhG28308	gmst	complete	CoA_binding|PF02629.19|3.5e-22,Succ_CoA_lig|PF13607.6|2.9e-07,Ligase_CoA|PF00549.19|9.1e-23,CoA_binding_2|PF13380.6|0.00096	succinate-CoA ligase (GDP-forming) activity		none	mitochondrion	OG0002190	Archaeplastida	NA
EhG5700.1	NA	NA	0.161504	0.0356203	3	3	1.11845	EhG22847,EhG22848	gmst	complete	NAD_binding_10|PF13460.6|3.6e-26,Epimerase|PF01370.21|1.5e-10,3Beta_HSD|PF01073.19|1.1e-05,NmrA|PF05368.13|5e-19	divinyl chlorophyllide a 8-vinyl-reductase activity	8.69799e+88	none	signal peptide	OG0003963	Archaeplastida	NA
EhG5723.1	NA	NA	0.183948	0.0405169	3	3	1.13599	EhG22873	getorf	complete	NA	shikimate metabolic process	121990	none	signal peptide	OG0007917	Archaeplastida	NA
EhG5799.3	Chlorophyll A-B binding protein		0.799025	0.000108951	3	3	1.73992	EhG37696,EhG37700	gmst	complete	Chloroa_b-bind|PF00504.21|8.4e-31	Chlorophyll A-B binding protein		none	mitochondrion	OG0000105	Archaeplastida	NA
EhG5893.1	Histidine phosphatase superfamily protein	Likely phophatase	0.73029	0.000584557	2	2	1.65897	EhG37968	gmst	complete	His_Phos_1|PF00300.22|5.3e-23	Histidine phosphatase superfamily (branch 1)	102778115480	none	mitochondrion	OG0006112	Archaeplastida	NA
EhG6008.1	NA	NA	0.279221	0.00781909	3	3	1.21354	EhG30246	getorf	complete	NA	translation initiation factor activity	2.70294e+29	none	other localisation	OG0003806	Archaeplastida	NA
EhG6034.5	NA	NA	0.130579	0.0461942	3	3	1.09473	EhG30272	gmst	complete	NA	O-phospho-L-serine:2-oxoglutarate aminotransferase activity	404470404471	none	other localisation	OG0002535	Archaeplastida	NA
EhG6046.2	NA	NA	0.234141	0.0141036	3	3	1.17621	NA	gmst	complete	WW|PF00397.26|9.2e-10,Arm|PF00514.23|0.00022,HEAT_2|PF13646.6|1.2e-06,Arm|PF00514.23|5.4e-05,WW|PF00397.26|6.6e-12,FYVE|PF01363.21|2.8e-17	nuclear import signal receptor activity		none	other localisation	OG0005596	Archaeplastida	NA
EhG6295.1	NA	NA	0.273591	0.0298652	2	2	1.20881	EhG14938	gmst	complete	Ribosomal_L12|PF00542.19|8.6e-26,Ribosomal_L12_N|PF16320.5|5.7e-14	structural constituent of ribosome		none	mitochondrion	OG0000793	Archaeplastida	NA
EhG6323.1	Bromodomain containing protein	binds acetylated lysines	0.63153	0.000389156	3	3	1.54921	EhG14910,EhG14911	gmst	complete	Bromodomain|PF00439.25|6.3e-22,Bromodomain|PF00439.25|1.8e-21,BET|PF17035.5|1.2e-14	acetylation-dependent protein binding	2.82063e+35	none	other localisation	OG0000073	Archaeplastida	NA
EhG6432.1	NA	NA	0.459738	0.00126168	3	3	1.37529	EhG24928	gmst	complete	NA	NA		none	signal peptide	OG0013577	Phaocystales	NA
EhG6504.1	NA	NA	0.157973	0.0411938	3	3	1.11572	EhG673	gmst	complete	Malate_synthase|PF01274.22|2.6e-137	Involved in the glycolate utilization. Catalyzes the condensation and subsequent hydrolysis of acetyl-coenzyme A (acetyl-CoA) and glyoxylate to form malate and CoA		none	mitochondrion	OG0005258	Archaeplastida	NA
EhG6592.1	NA	NA	0.21169	0.0279071	3	3	1.15804	EhG731	gmst	complete	dUTPase|PF00692.19|2.5e-45	dUTPase		none	other localisation	OG0003526	Archaeplastida	NA
EhG6615.6	NA	NA	0.153887	0.0285197	3	3	1.11256	EhG749	gmst	complete	AMP-binding|PF00501.28|4.4e-83	decanoate-CoA ligase activity	8.90724e+52	none	other localisation	OG0000136	Archaeplastida	NA
EhG6722.2	NA	NA	0.222125	0.00397797	3	3	1.16645	EhG42642	gmst	complete	NA	NA	2.82367e+83	none	signal peptide	OG0015694	Isochrysidales	NA
EhG6725.1	NA	NA	0.239973	0.00790765	3	3	1.18097	EhG42647	gmst	complete	Clat_adaptor_s|PF01217.20|4.2e-55	protein transporter activity	2.07006e+140	none	other localisation	OG0000720	Archaeplastida	NA
EhG7019.1	NA	NA	0.312416	0.00365101	3	3	1.24179	EhG17739	gmst	complete	PfkB|PF00294.24|3.3e-20	pfkB family carbohydrate kinase	2.14585e+17	none	other localisation	OG0007439	Archaeplastida	NA
EhG7029.2	NA	NA	0.181763	0.0113847	3	3	1.13427	EhG17749	gmst	complete	Roc|PF08477.13|2.6e-32,Arf|PF00025.21|3.5e-13,Ras|PF00071.22|7.7e-62,MMR_HSR1|PF01926.23|8.9e-05	GTPase activity	2.65776e+34	none	other localisation	OG0001034	Archaeplastida	NA
EhG7105.1	NA	NA	0.399395	0.0308494	3	3	1.31895	EhG28757	getorf	complete	NA	PPIC-type PPIASE domain	109596	none	signal peptide	OG0000453	Archaeplastida	NA
EhG7224.3	NA	NA	0.242072	0.011244	3	3	1.18269	EhG40915	gmst	complete	Pro_isomerase|PF00160.21|3e-25	peptidyl-prolyl cis-trans isomerase activity	409164363008	none	other localisation	OG0001717	Archaeplastida	NA
EhG7350.1	NA	NA	0.241308	0.0317654	3	3	1.18206	EhG44291	gmst	complete	PCRF|PF03462.18|6.8e-68,RF-1|PF00472.20|2.6e-34	translation release factor activity		none	signal peptide	OG0001438	Archaeplastida	NA
EhG7357.1	NA	NA	0.159308	0.0480247	3	3	1.11675	NA	gmst	complete	NDUFA12|PF05071.16|3.5e-06,NDUFA12|PF05071.16|2.3e-08	NADH dehydrogenase (quinone) activity		none	other localisation	OG0002875	Archaeplastida	NA
EhG7363.2	NA	NA	0.27968	0.0359993	3	3	1.21393	EhG18313	getorf	complete	NA	oxidation-reduction process		none	signal peptide	OG0000080	Archaeplastida	NA
EhG7406.1	NA	NA	0.152347	0.0185533	3	3	1.11138	EhG35266	gmst	complete	Peptidase_M17|PF00883.21|2.1e-86,Pdase_M17_N2|PF18295.1|2.6e-19	manganese ion binding	366314370865	none	other localisation	OG0004423	Archaeplastida	NA
EhG7489.1	NA	NA	0.316919	0.00707892	3	3	1.24567	EhG39653	gmst	complete	Roc|PF08477.13|7.8e-35,Ras|PF00071.22|1.2e-60,Arf|PF00025.21|7.8e-12,MMR_HSR1|PF01926.23|0.00024	GTPase activity	46031,46202,47995,48126,57293,58842,67810,67822,67831,76514,76518,76520,279686,88207,88208,88209,90499,90500,90501,262907,262908,262909,265232,265233,265234,269972,274292,406652,406653,406654,406655,406656,412834,412835,412836,412837,412838,398880,401076,105400,119808,358357,358358,358359,358361,358362,371053,371054,371055,371057,371058,311808,316771	none	other localisation	OG0000294	Archaeplastida	NA
EhG7502.1	NA	NA	0.397727	0.000405683	3	3	1.31743	EhG39664	getorf	complete	NA	adenyl-nucleotide exchange factor activity	2.84446e+98	none	mitochondrion	OG0001857	Archaeplastida	NA
EhG7778.5	Pyridoxal-dependent decarboxylase	Putative ornithine decarboyxlyase – polyamine synthesis	0.79905	0.000373062	3	3	1.73996	EhG28643	gmst	complete	Orn_Arg_deC_N|PF02784.16|9.8e-26,Orn_DAP_Arg_deC|PF00278.22|9.6e-16	putrescine biosynthetic process from ornithine		none	signal peptide	OG0002508	Archaeplastida	NA
EhG7788.1	S46 dipeptidyl-peptidase		0.595255	0.00350042	3	3	1.51074	EhG43298	gmst	complete	Peptidase_S46|PF10459.9|1.8e-41,Peptidase_S46|PF10459.9|2e-95,Trypsin_2|PF13365.6|8.3e-05	Peptidase S46		none	signal peptide	OG0009708	SAR/Hapista	NA
EhG7831.1	Putatie Myb transcription factor		0.816818	0.000246555	3	3	1.76152	EhG27011	gmst	complete	Myb_DNA-binding|PF00249.31|1.2e-08,NPL|PF17800.1|2.4e-17,Myb_DNA-bind_6|PF13921.6|0.0007	FKBP-type peptidyl-prolyl cis-trans isomerase		none	other localisation	OG0001902	Archaeplastida	NA
EhG7880.3	NA	NA	0.117567	0.0498024	3	3	1.0849	EhG27070	gmst	complete	NA	Catalyzes the reversible oxidation of malate to oxaloacetate		none	mitochondrion	OG0000786	Archaeplastida	NA
EhG7886.1	NA	NA	0.244851	0.0399857	3	3	1.18497	EhG27075	gmst	complete	Chloroa_b-bind|PF00504.21|6.3e-38	Chlorophyll A-B binding protein	221945,241822,241825,45584,45586,45589,45622,45736,45769,45840,45857,46080,46120,46216,46249,69406,69411,69417,69454,69457,75122,75123,75133,75140,280808,284341,284342,88702,88703,88704,88705,88706,90201,90202,90203,90204,90205,90206,263405,263406,263407,263408,263409,263410,264923,264924,264925,264926,264927,270911,270912,273771,407842,407843,407844,407845,412013,412014,399317,399318,400789,4007…	none	other localisation	OG0000105	Archaeplastida	NA
EhG8041.1	NA	NA	0.369128	0.00150642	3	3	1.29157	EhG9692	getorf	complete	NA	negative regulation of actin filament polymerization		none	other localisation	OG0004178	Archaeplastida	NA
EhG8062.2	NA	NA	0.460452	0.00496074	3	3	1.37597	EhG9714	getorf	complete	NA	tRNA (adenine-N6-)-methyltransferase activity	3.57743e+17	none	other localisation	OG0003942	Archaeplastida	NA
EhG81.1	NA	NA	0.786209	0.00132048	2	2	1.72454	EhG29815	gmst	complete	NA	NA		none	other localisation	OG0018897	Phaocystales	NA
EhG8282.1	NA	NA	0.325059	0.0249743	2	2	1.25272	NA	gmst	5primepartial	Bac_surface_Ag|PF01103.23|2.1e-28	sorting and assembly machinery component	255990124119	none	mitochondrion	OG0002967	Archaeplastida	NA
EhG8350.1	NA	NA	0.320442	0.0178002	3	3	1.24871	NA	gmst	complete	CS|PF04969.16|8.3e-07	prostaglandin-E synthase activity	4.02323e+23	none	other localisation	OG0000710	Archaeplastida	NA
EhG8489.2	NA	NA	0.205272	0.00635092	3	3	1.1529	EhG22067	gmst	complete	CH|PF00307.31|8.7e-12	actin binding		none	other localisation	OG0000469	Archaeplastida	NA
EhG8490.2	NA	NA	0.298584	0.00737512	3	3	1.22994	EhG22069	getorf	complete	NA	protein import into mitochondrial matrix	2.75772e+41	none	other localisation	OG0003167	Archaeplastida	NA
EhG8545.2	NA	NA	0.441272	0.000231499	3	3	1.3578	EhG22114	gmst	complete	NA	NA	402196350299	none	mitochondrion	OG0011954	Phaocystales	NA
EhG8557.1	Aldehyde dehydrogenase family protein		1.00436	0.000109404	3	3	2.00606	EhG22127	gmst	complete	Aldedh|PF00171.22|3.1e-12	Aldehyde dehydrogenase family	8.63599e+57	none	mitochondrion	OG0000957	Archaeplastida	NA
EhG8569.2	NA	NA	0.402653	0.00407493	3	3	1.32194	EhG22138	gmst	complete	NA	developmental process involved in reproduction		none	signal peptide	OG0018671	Isochrysidales	NA
EhG8648.2	NA	NA	0.326995	0.00371832	3	3	1.2544	EhG28949,EhG43966	gmst	complete	EF-hand_6|PF13405.6|0.00021,EF-hand_7|PF13499.6|6.6e-08,EF-hand_8|PF13833.6|0.0002,EF-hand_1|PF00036.32|1.9e-05,EF-hand_7|PF13499.6|2.7e-05,EF-hand_5|PF13202.6|2.4e-05	NA	4.02151e+17	none	signal peptide	OG0011216	SAR/Hapista	NA
EhG875.1	NA	NA	0.501225	0.00148379	3	3	1.41541	EhG33950	gmst	complete	NPL|PF17800.1|5.6e-19,Myb_DNA-binding|PF00249.31|9.9e-05	Peptidyl-prolyl cis-trans isomerase		none	other localisation	OG0001902	Archaeplastida	NA
EhG8894.1	NA	NA	0.236154	0.00983797	3	3	1.17785	EhG14342	gmst	complete	Skp1_POZ|PF03931.15|2.4e-08	positive regulation of transcription elongation from RNA polymerase II promoter	4.84095e+62	none	other localisation	OG0004508	Archaeplastida	NA
EhG8992.1	NA	NA	0.214209	0.00615338	3	3	1.16007	NA	gmst	complete	NAD_binding_10|PF13460.6|6.2e-36,Epimerase|PF01370.21|0.00012,NmrA|PF05368.13|2.4e-06	divinyl chlorophyllide a 8-vinyl-reductase activity	2.37449e+119	none	signal peptide	OG0004071	Archaeplastida	NA
EhG9.1	NA	NA	0.139294	0.023952	3	3	1.10137	EhG43654	gmst	complete	HSP33|PF01430.19|2.6e-56	Hsp33 protein		none	signal peptide	OG0004680	Archaeplastida	NA
EhG9031.2	NA	NA	0.311735	0.00300451	3	3	1.2412	EhG39770	gmst	complete	tRNA-synt_1b|PF00579.25|2.9e-88	tryptophanyl-tRNA aminoacylation	397754	none	mitochondrion	OG0003171	Archaeplastida	NA
EhG9056.1	NA	NA	0.28422	0.0248241	3	3	1.21775	EhG36488	gmst	complete	Ank|PF00023.30|0.00044,Ank_2|PF12796.7|0.00022,Ank_5|PF13857.6|0.00062,Ank_4|PF13637.6|0.00019,Ank_5|PF13857.6|0.00012,Ank_4|PF13637.6|1.5e-06,Ank_2|PF12796.7|2.2e-14,Ank_5|PF13857.6|4.6e-05,Ank_4|PF13637.6|5e-11,Ank_2|PF12796.7|3.8e-05,Ank_2|PF12796.7|9.5e-09,Ank_5|PF13857.6|3.3e-09,Ank|PF00023.30|0.00012,Ank_4|PF13637.6|7.1e-08,Ank_3|PF13606.6|0.00013	response to abiotic stimulus		none	other localisation	OG0001552	Archaeplastida	NA
EhG9090.1	NA	NA	0.483751	0.000374553	3	3	1.39837	EhG36520	gmst	complete	NA	NA		none	chloroplast	OG0023389	E_huxleyi	NA
EhG911.2	NA	NA	0.202691	0.00923137	3	3	1.15084	EhG33985	gmst	complete	PUA_2|PF14306.6|8.6e-42,ATP-sulfurylase|PF01747.17|5.3e-64	sulfate adenylyltransferase (ATP) activity	2.85103e+116	none	signal peptide	OG0001979	Archaeplastida	NA
EhG9114.1	NA	NA	0.457195	0.000582489	3	3	1.37287	EhG36546	gmst	complete	GrpE|PF01025.19|9e-22	Participates actively in the response to hyperosmotic and heat shock by preventing the aggregation of stress-denatured proteins, in association with DnaK and GrpE. It is the nucleotide exchange factor for DnaK and may function as a thermosensor. Unfolded proteins bind initially to DnaJ		none	signal peptide	OG0008078	SAR/Hapista	NA
EhG9200.2	NA	NA	0.325272	0.000917852	3	3	1.2529	EhG26533	gmst	complete	IBN_N|PF03810.19|1.8e-09,HEAT_EZ|PF13513.6|2.5e-07	ribosomal protein import into nucleus		none	other localisation	OG0001989	Archaeplastida	NA
EhG9212.1	NA	NA	0.33054	0.00757449	3	3	1.25748	EhG26545	gmst	complete	Peptidase_M17|PF00883.21|1.3e-97	manganese ion binding	4.84115e+19	none	signal peptide	OG0001329	Archaeplastida	NA
EhG9231.4	NA	NA	0.288584	0.00408938	3	3	1.22144	EhG26558	gmst	complete	NA	NA	4.03617e+35	none	other localisation	OG0009753	SAR/Hapista	NA
EhG9312.1	NA	NA	0.189599	0.0321699	3	3	1.14045	EhG23010	gmst	complete	NA	NA		none	signal peptide	OG0006201	SAR/Hapista	NA
EhG9329.2	NA	NA	0.277532	0.0266987	2	2	1.21212	EhG23032	gmst	complete	IF4E|PF01652.18|1.6e-12,IF4E|PF01652.18|1.5e-28	translation initiation factor activity		none	other localisation	OG0000348	Archaeplastida	NA
EhG9342.3	NA	NA	0.206483	0.004966	3	3	1.15387	EhG42329	gmst	complete	MAAL_C|PF07476.11|6.6e-06,Enolase_C|PF00113.22|2.5e-153,MR_MLE_C|PF13378.6|4.9e-09,Enolase_N|PF03952.16|5.6e-54	phosphopyruvate hydratase activity		none	other localisation	OG0000408	Archaeplastida	NA
EhG9402.1	NA	NA	0.566249	0.000695971	3	3	1.48067	EhG32219	getorf	complete	NA	Integral membrane protein TerC family	373794	none	signal peptide	OG0000685	Archaeplastida	NA
EhG9447.1	NA	NA	0.236813	0.00375609	3	3	1.17839	EhG32267	gmst	complete	PMSR|PF01625.21|1.4e-50	peptide-methionine (S)-S-oxide reductase activity		none	signal peptide	OG0000151	Archaeplastida	NA
EhG9470.1	NA	NA	0.330067	0.001164	3	3	1.25707	EhG32293	gmst	complete	Proteasome_A_N|PF10584.9|2.5e-10,Proteasome|PF00227.26|4.1e-56	threonine-type endopeptidase activity		none	other localisation	OG0002582	Archaeplastida	NA
EhG9519.4	NA	NA	0.383567	0.00165452	3	3	1.30456	EhG27150	getorf	complete	NA	cyclin-dependent protein serine/threonine kinase activity		none	other localisation	OG0000077	Archaeplastida	NA
EhG9547.1	NA	NA	0.224588	0.0219277	3	3	1.16844	EhG27175	gmst	complete	Sod_Ni|PF09055.11|3.5e-31	Nickel-containing superoxide dismutase		none	mitochondrion	OG0002039	Archaeplastida	NA
EhG9607.1	NA	NA	0.26468	0.0181692	3	3	1.20137	EhG27238	gmst	complete	NA	NA	200254	none	other localisation	OG0004772	Archaeplastida	NA
EhG979.1	NA	NA	0.181232	0.0101708	3	3	1.13385	EhG39006	gmst	complete	CSD|PF00313.22|1.9e-11,CSD|PF00313.22|3.1e-13,OB_RNB|PF08206.11|0.00018	Cold shock protein domain	4.04094e+29	none	other localisation	OG0000564	SAR/Hapista	NA
EhG9847.5	NA	NA	0.404753	0.000814024	3	3	1.32386	EhG8195	gmst	complete	LDcluster4|PF18306.1|6e-07,Lysine_decarbox|PF03641.14|2e-23	Possible lysine decarboxylase	4337943424	none	other localisation	OG0003729	Archaeplastida	NA
EhG9997.1	NA	NA	0.178364	0.0111176	3	3	1.1316	NA	gmst	complete	SAICAR_synt|PF01259.18|1.5e-44	phosphoribosylaminoimidazole carboxylase activity	410069364775	none	other localisation	OG0002953	Archaeplastida	NA
chloro|NC_007288.1_prot_YP_277314.1_6	NA	NA	0.230161	0.0349696	3	3	1.17297	NA	NA	NA	NA	NA	NA	NA	NA	NA	E_huxleyi	NA
chloro|NC_007288.1_prot_YP_277318.1_10	NA	NA	0.419671	0.00709952	3	3	1.33762	NA	NA	NA	NA	NA	NA	NA	NA	NA	E_huxleyi	NA
chloro|NC_007288.1_prot_YP_277323.1_15	NA	NA	0.177633	0.0145475	3	3	1.13103	NA	NA	NA	NA	NA	NA	NA	NA	NA	E_huxleyi	NA
chloro|NC_007288.1_prot_YP_277332.1_24	NA	NA	0.610569	9.56786e-05	3	3	1.52686	NA	NA	NA	NA	NA	NA	NA	NA	NA	E_huxleyi	NA
chloro|NC_007288.1_prot_YP_277348.1_40	NA	NA	0.211527	0.0112991	3	3	1.15791	NA	NA	NA	NA	NA	NA	NA	NA	NA	E_huxleyi	NA
chloro|NC_007288.1_prot_YP_277358.1_50	NA	NA	0.275837	0.00348889	3	3	1.2107	NA	NA	NA	NA	NA	NA	NA	NA	NA	E_huxleyi	NA
con|TRYP_PIG|	NA	NA	0.776944	0.00877467	3	3	1.7135	NA	NA	NA	NA	NA	NA	NA	NA	NA	E_huxleyi	NA
Br10717.t1	NA	NA	-0.276735	0.026554	3	3	0.825457	NA	Braker	NA	None	NA	2.23945e+23	none	other localisation	OG0012658	Archaeplastida	NA
Br11034.t1	NA	NA	-0.217311	0.0382725	2	2	0.860167	NA	Braker	NA	None	protein modification by small protein conjugation		none	other localisation	OG0002347	Archaeplastida	NA
Br11831.t1	NA	NA	-0.260963	0.00305933	3	3	0.834531	NA	Braker	NA	None	phosphopantetheine binding		none	other localisation	NA	E_huxleyi	No Orthogroup
Br16409.t1	NA	NA	-0.268489	0.00757449	3	3	0.830188	NA	Braker	NA	None	gamete generation		none	signal peptide	OG0002172	Archaeplastida	NA
Br16621.t1	NA	NA	-0.258736	0.016287	2	2	0.83582	NA	Braker	NA	None	1,2-diacylglycerol 3-beta-galactosyltransferase activity		none	other localisation	OG0001257	Archaeplastida	NA
Br16741.t1	NA	NA	-0.217124	0.00638627	3	3	0.860279	NA	Braker	NA	None	homoserine dehydrogenase activity		none	chloroplast	OG0001551	Archaeplastida	NA
Br17786.t1	NA	NA	-0.217464	0.0119394	3	3	0.860076	NA	Braker	NA	None	fatty acid biosynthetic process		none	other localisation	OG0001100	Archaeplastida	NA
Br20523.t1	NA	NA	-0.767587	0.000584557	3	3	0.587399	NA	Braker	NA	None	unfolded protein binding		none	other localisation	OG0002771	Archaeplastida	NA
Br23856.t1	NA	NA	-0.245016	0.0320783	3	3	0.843807	NA	Braker	NA	None	fatty acid biosynthetic process		none	other localisation	OG0001100	Archaeplastida	NA
Br24168.t1	NA	NA	-0.500996	0.00340102	2	2	0.706619	NA	Braker	NA	None	modification-dependent protein catabolic process		none	other localisation	OG0001762	Archaeplastida	NA
Br2550.t1	NA	NA	-0.373142	0.000580408	3	3	0.772099	NA	Braker	NA	None	NA		none	other localisation	OG0033315	E_huxleyi	NA
Br2602.t1	NA	NA	-0.630389	0.000109404	3	3	0.646002	NA	Braker	NA	None	structural constituent of ribosome		none	mitochondrion	OG0002158	Archaeplastida	NA
Br26200.t1	NA	NA	-0.967701	0.000492753	3	3	0.51132	NA	Braker	NA	None	NA		none	other localisation	OG0033155	E_huxleyi	NA
Br27873.t1	NA	NA	-0.394584	0.00882383	3	3	0.760709	NA	Braker	NA	None	ATP binding	4.70445e+40	none	signal peptide	OG0084868	E_huxleyi	Coccolithophore specific in 1/6 species
Br30220.t1	NA	NA	-0.24568	0.0185489	2	2	0.843418	NA	Braker	NA	None	U-box domain-containing protein	6.82067e+26	none	other localisation	OG0000111	Archaeplastida	NA
Br31871.t1	NA	NA	-0.796283	0.00322161	3	3	0.575831	NA	Braker	NA	None	dihydrokaempferol 4-reductase activity		none	other localisation	OG0000402	Archaeplastida	NA
Br34343.t1	NA	NA	-0.360026	0.00115144	3	3	0.779151	NA	Braker	NA	None	ATP-dependent serine protease that mediates the selective degradation of misfolded, unassembled or oxidatively damaged polypeptides as well as certain short-lived regulatory proteins in the mitochondrial matrix. May also have a chaperone function in the assembly of inner membrane protein complexes. Participates in the regulation of mitochondrial gene expression and in the maintenance of the integ…	3.59055e+23	none	mitochondrion	OG0000475	Archaeplastida	NA
Br3482.t1	NA	NA	-0.363247	0.00283987	3	3	0.777413	NA	Braker	NA	None	phosphopantetheine binding		none	other localisation	OG0000053	Archaeplastida	NA
Br3483.t1	NA	NA	-0.211992	0.0122208	3	3	0.863344	NA	Braker	NA	None	phosphopantetheine binding		none	other localisation	OG0000053	Archaeplastida	NA
Br3484.t1	NA	NA	-0.307143	0.0229225	3	3	0.808241	NA	Braker	NA	None	phosphopantetheine binding		none	other localisation	OG0000053	Archaeplastida	NA
Br35890.t1	NA	NA	-0.126644	0.0319827	3	3	0.91596	NA	Braker	NA	None	serine-type exopeptidase activity		none	other localisation	OG0000572	Archaeplastida	NA
Br36700.t1	NA	NA	-0.344493	0.0017824	3	3	0.787585	NA	Braker	NA	None	lipid binding	252067	Model Notes:No issues:Mary Klute:2011-11-21 Defline:EpsinR:Mary Klute:2011-11-21	other localisation	OG0001045	Archaeplastida	NA
Br37553.t1	NA	NA	-0.324948	0.000869999	3	3	0.798327	NA	Braker	NA	None	NA		none	other localisation	OG0012450	Calcihaptophyta	Coccolithophore specific in Gephyrocapsa Zygodiscales Coccolithales
Br38494.t1	NA	NA	-0.280439	0.0452665	2	2	0.82334	NA	Braker	NA	None	fatty acid biosynthetic process		none	other localisation	OG0000053	Archaeplastida	NA
Br39222.t1	NA	NA	-0.520736	0.000244211	3	3	0.697016	NA	Braker	NA	None	glyceraldehyde-3-phosphate dehydrogenase (NAD(P)+) (phosphorylating) activity	2.65872e+40	none	other localisation	OG0002398	Archaeplastida	NA
Br39333.t1	NA	NA	-0.807087	0.00623175	2	2	0.571535	NA	Braker	NA	None	NA		none	other localisation	OG0041270	Gephyrocapsa	Coccolithophore specific in 2/6 species
Br42442.t1	NA	NA	-0.619781	0.0104388	2	2	0.65077	NA	Braker	NA	None	NA		none	other localisation	OG0001865	Calcihaptophyta	NA
Br44108.t1	NA	NA	-0.156864	0.0388298	3	3	0.896973	NA	Braker	NA	None	NA	215611	none	signal peptide	OG0005423	Phaocystales	NA
Br44912.t1	NA	NA	-0.344187	0.00553982	3	3	0.787752	NA	Braker	NA	None	regulation of pentose-phosphate shunt	449114495745137	none	signal peptide	OG0000234	Archaeplastida	NA
Br45629.t1	NA	NA	-0.31475	0.0153069	2	2	0.803991	NA	Braker	NA	None	ATPase activity		none	other localisation	OG0002469	Archaeplastida	NA
Br45865.t1	NA	NA	-0.723377	0.00950184	3	3	0.605678	NA	Braker	NA	None	NA		none	other localisation	OG0056145	E_huxleyi	NA
Br48831.t1	NA	NA	-0.36937	0.0243184	3	3	0.774121	NA	Braker	NA	None	NA		none	other localisation	OG0056247	Gephyrocapsa	Coccolithophore specific in 2/6 species
Br49718.t1	NA	NA	-0.754729	0.00202434	2	2	0.592658	NA	Braker	NA	None	NA		none	other localisation	OG0042069	E_huxleyi	NA
Br49785.t1	NA	NA	-0.70921	0.000147482	3	3	0.611655	NA	Braker	NA	None	protein homooligomerization		none	signal peptide	OG0027176	Gephyrocapsa	Coccolithophore specific in 2/6 species
Br51972.t1	NA	NA	-0.508196	0.000288022	3	3	0.703101	NA	Braker	NA	None	phosphopantetheine binding		none	other localisation	OG0000053	Archaeplastida	NA
Br52857.t1	NA	NA	-0.413433	0.00425775	3	3	0.750834	NA	Braker	NA	None	NA		none	other localisation	OG0033315	E_huxleyi	NA
Br53113.t1	NA	NA	-0.487178	0.000582489	3	3	0.713419	NA	Braker	NA	None	NA		none	mitochondrion	OG0020814	E_huxleyi	NA
Br54751.t1	NA	NA	-0.425247	0.0155463	3	3	0.744711	NA	Braker	NA	None	NA		none	other localisation	OG0056706	Gephyrocapsa	Coccolithophore specific in 2/6 species
Br55913.t1	NA	NA	-0.163351	0.0438192	3	3	0.892949	NA	Braker	NA	None	regulation of protein catabolic process	355424	none	other localisation	OG0001666	Archaeplastida	NA
Br5977.t1	NA	NA	-0.336382	0.000767194	3	3	0.792025	NA	Braker	NA	None	thioredoxin-disulfide reductase activity		none	signal peptide	OG0000909	Archaeplastida	NA
Br6259.t1	NA	NA	-0.307344	0.00514305	3	3	0.808128	NA	Braker	NA	None	UDP-glucose:glycoprotein glucosyltransferase activity		none	signal peptide	OG0000930	Archaeplastida	NA
Br6729.t1	NA	NA	-0.139316	0.0362207	3	3	0.907949	NA	Braker	NA	None	negative regulation of protein kinase activity by regulation of protein phosphorylation		none	other localisation	OG0004201	Archaeplastida	NA
Br7358.t1	NA	NA	-0.208851	0.0355924	2	2	0.865226	NA	Braker	NA	None	maintenance of mitotic sister chromatid cohesion, centromeric	4468274330315540	none	other localisation	OG0002187	Archaeplastida	NA
Br897.t1	NA	NA	-0.759421	0.00110439	2	2	0.590733	NA	Braker	NA	None	NA		none	mitochondrion	NA	E_huxleyi	No Orthogroup
EhG10019.3	NA	NA	-0.53064	0.00374554	2	2	0.692248	EhG41629	gmst	complete	NA	NA		none	signal peptide	OG0010015	Phaocystales	NA
EhG10091.1	NA	NA	-0.177209	0.0302303	3	3	0.884413	EhG35596	gmst	complete	PTPLA|PF04387.14|5.8e-36	3-hydroxy-lignoceroyl-CoA dehydratase activity		none	signal peptide	OG0000923	Archaeplastida	NA
EhG10141.5	NA	NA	-0.29898	0.0264116	3	3	0.812827	EhG21250	gmst	complete	Hist_deacetyl|PF00850.19|2.1e-82	NAD-dependent histone deacetylase activity (H3-K14 specific)	398999	none	other localisation	OG0000368	Archaeplastida	NA
EhG10379.2	NA	NA	-0.125521	0.0473189	3	3	0.916673	EhG37982	gmst	complete	Band_7|PF01145.25|1.5e-29	SPFH domain / Band 7 family	2.68907e+41	none	mitochondrion	OG0005823	Prymnesiales	NA
EhG10491.4	NA	NA	-0.200014	0.020251	3	3	0.870542	EhG31667	gmst	complete	Adaptin_N|PF01602.20|7.4e-95,Coatomer_b_Cpla|PF14806.6|5.2e-57,Coatamer_beta_C|PF07718.12|9.3e-51	intracellular protein transport		none	other localisation	OG0001277	Archaeplastida	NA
EhG10501.1	NA	NA	-0.160976	0.0237335	3	3	0.89442	EhG31659	getorf	complete	NA	NA		none	mitochondrion	OG0001721	Phaocystales	NA
EhG10534.1	NA	NA	-0.336422	0.00189416	3	3	0.792003	EhG30799	gmst	complete	NA	NA	243179284534	none	other localisation	OG0003934	SAR/Hapista	NA
EhG10901.2	NA	NA	-0.506931	0.000484333	3	3	0.703718	EhG4541	getorf	complete	NA	Chlorophyll A-B binding protein	2.80515e+63	none	mitochondrion	OG0000018	Archaeplastida	NA
EhG10989.1	NA	NA	-0.163117	0.0236719	3	3	0.893093	EhG4455	gmst	complete	Helicase_C|PF00271.31|8e-28,DEAD|PF00270.29|7.8e-45	helicase activity		none	other localisation	OG0000012	Archaeplastida	NA
EhG11001.2	NA	NA	-0.272394	0.0203217	2	2	0.827945	EhG4440	gmst	complete	FA_hydroxylase|PF04116.13|0.00084	NA		none	chloroplast	OG0003657	SAR/Hapista	NA
EhG11026.1	NA	NA	-0.472588	0.00348164	3	3	0.720671	NA	gmst	complete	Ribosomal_S8|PF00410.19|7e-20	structural constituent of ribosome	5896070881	none	other localisation	OG0001293	Archaeplastida	NA
EhG11059.21	NA	NA	-0.406736	0.000582171	3	3	0.754328	EhG4378	gmst	complete	MFS_2|PF13347.6|2.1e-05,MFS_1|PF07690.16|1.3e-11,MFS_1|PF07690.16|3.3e-05	cellular response to nitrate	362627	none	other localisation	OG0000167	Archaeplastida	NA
EhG11099.7	NA	NA	-0.294849	0.00801434	3	3	0.815157	EhG4334	gmst	complete	NA	NA	2.47612e+107	none	mitochondrion	OG0009153	Zygodiscales	Coccolithophore specific in 3/6 species
EhG11147.3	NA	NA	-0.172377	0.0172422	3	3	0.887379	EhG40039	gmst	complete	Dala_Dala_lig_C|PF07478.13|3.6e-07,Dala_Dala_lig_C|PF07478.13|2.3e-08,MGS|PF02142.22|3e-15,CPSase_L_D3|PF02787.19|7.2e-40,CPSase_L_D2|PF02786.17|4.8e-25,ATP-grasp|PF02222.22|3.5e-11,ATP-grasp|PF02222.22|1.8e-06,ATPgrasp_Ter|PF15632.6|3.8e-08,ATPgrasp_Ter|PF15632.6|0.00031,CPSase_L_D2|PF02786.17|1.4e-79,CPSase_sm_chain|PF00988.22|1.8e-50,GATase|PF00117.28|1.1e-40	carbamoyl-phosphate synthase (glutamine-hydrolyzing) activity		none	other localisation	OG0000379	Archaeplastida	NA
EhG1124.1	NA	NA	-0.308754	0.00243993	3	3	0.807339	EhG31982	gmst	complete	TPR_19|PF14559.6|1.8e-05,TPR_16|PF13432.6|7.2e-06,PRP1_N|PF06424.12|5.6e-42,TPR_19|PF14559.6|5.1e-05,TPR_14|PF13428.6|6.6e-05	spliceosomal tri-snRNP complex assembly		none	other localisation	OG0002280	Archaeplastida	NA
EhG11257.3	NA	NA	-0.652419	0.000374835	3	3	0.636213	EhG28192	gmst	complete	NA	NA		none	other localisation	OG0000560	Archaeplastida	NA
EhG11258.1	NA	NA	-0.526097	0.0150319	3	3	0.694431	EhG28194	gmst	complete	NA	NA	3.73019e+17	none	signal peptide	OG0010014	Archaeplastida	NA
EhG11276.3	Mitochondrial carrier protein		-0.775545	4.81904e-05	3	3	0.584168	EhG28213	gmst	complete	Mito_carr|PF00153.27|2e-17,Mito_carr|PF00153.27|3.6e-17,Mito_carr|PF00153.27|1.8e-18	oxidative phosphorylation uncoupler activity	2.12466e+96	none	other localisation	OG0000143	Archaeplastida	NA
EhG11286.3	NA	NA	-0.492688	0.000145117	3	3	0.7107	EhG43992	gmst	complete	NA	NA	2.79004e+23	none	other localisation	OG0004973	Archaeplastida	NA
EhG11301.2	NA	NA	-0.272464	0.00642635	3	3	0.827904	EhG43241	gmst	complete	ADH_zinc_N_2|PF13602.6|1.7e-05,ADH_zinc_N|PF00107.26|5.5e-12,SAM_2|PF07647.17|0.00021,SAM_1|PF00536.30|5.7e-06,DnaJ|PF00226.31|5.7e-15	fatty acid biosynthetic process	269412	none	other localisation	OG0001100	Archaeplastida	NA
EhG11411.7	NA	NA	-0.19521	0.0359993	2	2	0.873446	EhG11412,EhG34540	gmst	complete	ATP-synt_C|PF00137.21|5.1e-15,ATP-synt_C|PF00137.21|2.6e-13	ATP hydrolysis coupled proton transport		none	signal peptide	OG0011927	Gephyrocapsa	Coccolithophore specific in 2/6 species
EhG11570.2	NA	NA	-0.179094	0.0311568	3	3	0.883258	EhG24008	getorf	complete	NA	Chlorophyll A-B binding protein	4.66865e+95	none	signal peptide	OG0002626	Archaeplastida	NA
EhG11745.1	NA	NA	-0.254542	0.0212678	3	3	0.838253	EhG4665	gmst	complete	NA	NA		none	signal peptide	OG0020731	Isochrysidales	NA
EhG11793.1	NA	NA	-0.342514	0.00229644	3	3	0.788666	EhG38945	gmst	complete	Pkinase_Tyr|PF07714.17|5.6e-29,Pkinase|PF00069.25|7e-63,Haspin_kinase|PF12330.8|2.2e-05	MAP kinase activity		none	other localisation	OG0000035	Archaeplastida	NA
EhG11851.1	NA	NA	-0.317486	0.00230904	3	3	0.802467	EhG12219	transdec	complete	NAD_binding_8|PF13450.6|3.5e-12,Amino_oxidase|PF01593.24|1.4e-11,FAD_binding_2|PF00890.24|4.2e-05,Thi4|PF01946.17|0.00015	all-trans-retinol 13,14-reductase activity	4.05767e+23	none	signal peptide	OG0000425	Archaeplastida	NA
EhG11874.1	NA	NA	-0.613593	0.000158552	3	3	0.653567	NA	gmst	complete	NA	NA	317334	none	signal peptide	OG0009143	Gephyrocapsa	Coccolithophore specific in 2/6 species
EhG1188.1	NA	NA	-0.433322	0.000364891	3	3	0.740555	EhG18492	transdec	complete	Ribosomal_L21e|PF01157.18|4.3e-37	structural constituent of ribosome	245755,47516,47556,47557,47565,48956,48960,58126,58137,65766,65810,65817,76212,76213,76215,76217,284862,87605,87606,87607,90429,90430,90431,262300,262301,262302,265161,265162,265163,405228,405229,405230,405231,412660,412661,412662,412663,398352,401017,355673,355674,355675,355676,370619,370620,370621,370622,310738,316588	none	other localisation	OG0001501	Archaeplastida	NA
EhG1189.1	NA	NA	-0.147549	0.0248241	3	3	0.902783	EhG18491	getorf	complete	NA	glutamyl-tRNA aminoacylation	523685828176218	none	signal peptide	OG0002445	Archaeplastida	NA
EhG11894.1	NA	NA	-0.546675	0.00411435	3	3	0.684596	EhG12182	gmst	complete	NA	NA	4.05786e+23	none	other localisation	OG0003163	Archaeplastida	NA
EhG11949.4	NA	NA	-0.132624	0.0428917	3	3	0.912171	EhG12131	gmst	complete	Kinase-like|PF14531.6|6.4e-09,Pkinase_Tyr|PF07714.17|1.2e-42,Pkinase|PF00069.25|4.4e-78,UBA_2|PF08587.11|0.00032,KA1|PF02149.19|1.3e-08,AdenylateSensor|PF16579.5|2.8e-09	protein serine/threonine kinase activity	356166356167	none	other localisation	OG0000042	Archaeplastida	NA
EhG12005.1	NA	NA	-0.195726	0.00625481	3	3	0.873134	EhG23754	gmst	complete	GFO_IDH_MocA|PF01408.22|1.7e-06	NA	2.17813e+59	none	other localisation	OG0001566	SAR/Hapista	NA
EhG12109.1	NA	NA	-0.296546	0.00283987	3	3	0.814199	EhG23640	gmst	complete	Ribosomal_L28e|PF01778.17|2.2e-29	structural constituent of ribosome	2.1074e+53	none	other localisation	OG0002049	Archaeplastida	NA
EhG122.1	NA	NA	-0.183306	0.0423997	3	3	0.880683	EhG29803	getorf	complete	NA	intracellular protein transport		none	other localisation	OG0001639	Archaeplastida	NA
EhG12226.1	NA	NA	-0.274715	0.00514305	3	3	0.826614	EhG11845	gmst	complete	Aconitase|PF00330.20|1.7e-156,Aconitase_C|PF00694.19|2e-34	3-isopropylmalate dehydratase activity		none	mitochondrion	OG0001445	Archaeplastida	NA
EhG12232.1	NA	NA	-0.223734	0.00642383	3	3	0.856346	EhG11836	gmst	complete	NA	NA	2.11784e+71	none	signal peptide	OG0005602	SAR/Hapista	NA
EhG12267.1	NA	NA	-0.278253	0.00375609	3	3	0.824589	EhG28388	getorf	complete	NA	o-methyltransferase		none	mitochondrion	OG0006078	Archaeplastida	NA
EhG12325.10	NA	NA	-0.366449	0.00121996	3	3	0.775689	EhG28440	gmst	complete	Ribosomal_L13e|PF01294.18|2.9e-71	structural constituent of ribosome		none	other localisation	OG0001312	Archaeplastida	NA
EhG12372.10	NA	NA	-0.462801	0.00150544	3	3	0.725576	EhG44020	gmst	complete	Ribosomal_L5e|PF17144.4|4.1e-85,Ribosomal_L18_c|PF14204.6|3.9e-30	5S rRNA binding		none	other localisation	OG0001581	Archaeplastida	NA
EhG12372.21	NA	NA	-0.393929	0.00268832	3	3	0.761054	EhG44020	gmst	5primepartial	Ribosomal_L18_c|PF14204.6|2e-31,Ribosomal_L5e|PF17144.4|6.5e-68	5S rRNA binding		none	other localisation	OG0001581	Archaeplastida	NA
EhG12427.1	NA	NA	-0.243056	0.0358255	3	3	0.844954	EhG17819	getorf	complete	NA	pentatricopeptide repeat protein	4.03929e+23	none	mitochondrion	OG0002704	Archaeplastida	NA
EhG12508.4	NA	NA	-0.174217	0.0204437	3	3	0.886249	EhG3487	gmst	complete	Na_H_Exchanger|PF00999.21|4.5e-55	potassium:proton antiporter activity		none	signal peptide	OG0000291	Archaeplastida	NA
EhG12509.8	ATP synthase subunit C		-0.424897	0.00545974	3	3	0.744892	EhG3488	gmst	complete	ATP-synt_C|PF00137.21|3.5e-09,ATP-synt_C|PF00137.21|2e-10	ATP hydrolysis coupled proton transport		none	signal peptide	OG0041200	E_huxleyi	Coccolithophore specific in 1/6 species
EhG12565.2	NA	NA	-0.399054	0.00898276	2	2	0.758355	EhG3541	gmst	complete	Pentapeptide|PF00805.22|1.1e-08,Pentapeptide_4|PF13599.6|1.1e-08,Pentapeptide|PF00805.22|4.8e-05,Pentapeptide|PF00805.22|2e-06,Pentapeptide_3|PF13576.6|2.3e-05,Pentapeptide|PF00805.22|0.00013,Pentapeptide_4|PF13599.6|0.00013,Pentapeptide|PF00805.22|0.00014,Pentapeptide|PF00805.22|1e-09	protein homooligomerization	4.52555e+19	none	other localisation	OG0054314	Gephyrocapsa	Coccolithophore specific in 2/6 species
EhG1268.1	NA	NA	-0.228735	0.024985	2	2	0.853383	EhG18408	gmst	complete	NA	NA	2.01938e+28	none	other localisation	OG0032638	Prymnesiales	NA
EhG12780.1	NA	NA	-0.43037	0.00107616	3	3	0.742072	EhG35439	transdec	complete	PALP|PF00291.25|1.9e-58	cysteine biosynthetic process from serine		none	mitochondrion	OG0000128	Archaeplastida	NA
EhG12830.1	NA	NA	-0.176832	0.0108363	3	3	0.884643	EhG35481,EhG35482	gmst	complete	NAD_binding_1|PF00175.21|4.8e-27	NADPH-hemoprotein reductase activity		none	other localisation	OG0000218	Archaeplastida	NA
EhG1300.1	NA	NA	-0.554827	0.00348407	3	3	0.680739	EhG18368	gmst	complete	ATP-synt_F|PF01990.17|4.8e-31	Subunit of the peripheral V1 complex of vacuolar ATPase essential for assembly or catalytic function. V-ATPase is responsible for acidifying a variety of intracellular compartments in eukaryotic cells		none	other localisation	OG0004029	Archaeplastida	NA
EhG13070.22	NA	NA	-0.253822	0.032039	3	3	0.838672	EhG35678	gmst	complete	NA	NA		none	other localisation	OG0002820	Gephyrocapsa	Coccolithophore specific in 2/6 species
EhG13176.10	NA	NA	-0.229522	0.00625887	3	3	0.852918	EhG38546	gmst	5primepartial	ABC_tran|PF00005.27|1.4e-14,ABC_tran|PF00005.27|6.8e-22	protein kinase regulator activity	285701274893	none	mitochondrion	OG0000206	Archaeplastida	NA
EhG133.2	NA	NA	-0.27475	0.0130455	3	3	0.826593	EhG29791	gmst	5primepartial	FKBP_C|PF00254.28|4.4e-28	peptidyl-prolyl cis-trans isomerase activity		none	other localisation	OG0000021	Archaeplastida	NA
EhG13301.3	NA	NA	-0.304968	0.00230277	3	3	0.80946	EhG2343	gmst	complete	Sacchrp_dh_NADP|PF03435.18|0.00033,Polysacc_synt_2|PF02719.15|0.00074,Epimerase|PF01370.21|1.3e-46,NAD_binding_4|PF07993.12|8.9e-10,GDP_Man_Dehyd|PF16363.5|5.7e-29,3Beta_HSD|PF01073.19|8e-09,RmlD_sub_bind|PF04321.17|1e-06	UDP-glucuronate decarboxylase activity		none	other localisation	OG0006656	Archaeplastida	NA
EhG13366.20	NA	NA	-0.22578	0.00615338	3	3	0.855133	EhG2278,EhG44186	gmst	complete	Polysacc_synt_2|PF02719.15|5.5e-19,Epimerase|PF01370.21|1e-52,RmlD_sub_bind|PF04321.17|3.4e-15,NAD_binding_4|PF07993.12|4.6e-16,3Beta_HSD|PF01073.19|4.9e-14,NAD_binding_10|PF13460.6|1e-07,GDP_Man_Dehyd|PF16363.5|1.3e-58	dTDP-glucose 4,6-dehydratase activity	79634	none	other localisation	OG0000613	Archaeplastida	NA
EhG13447.1	NA	NA	-0.284802	0.00831131	3	3	0.820854	EhG2198	gmst	complete	Fer4_12|PF13353.6|0.00043	lysine 2,3-aminomutase activity	4.0684e+41	none	signal peptide	OG0009236	SAR/Hapista	NA
EhG13732.1	NA	NA	-0.659494	0.000127398	3	3	0.6331	EhG17186	gmst	complete	NA	NA		none	other localisation	OG0055345	E_huxleyi	Coccolithophore specific in 1/6 species
EhG13830.1	NA	NA	-0.260474	0.0108363	3	3	0.834813	EhG21520,EhG21521,EhG24394	transdec	5prime_partial	NA	NA		none	mitochondrion	OG0016720	Calcihaptophyta	NA
EhG13844.2	NA	NA	-0.219821	0.0371828	3	3	0.858672	EhG21507	gmst	5primepartial	zf-Tim10_DDP|PF02953.15|3.2e-24	protein transport		none	other localisation	OG0002337	Archaeplastida	NA
EhG13852.1	NA	NA	-0.315934	0.0121084	3	3	0.803331	EhG21501	gmst	complete	NA	macromolecule localization	2.05289e+53	none	chloroplast	OG0005625	Phaocystales	NA
EhG13880.1	NA	NA	-0.201853	0.00668251	3	3	0.869433	EhG21480	gmst	complete	p450|PF00067.22|1.8e-64	cytochrome p450		none	signal peptide	OG0000070	Archaeplastida	NA
EhG13900.3	NA	NA	-0.283186	0.0182556	3	3	0.821774	EhG21462	gmst	complete	NA	NA		none	signal anchor	OG0007912	Haptophyta	NA
EhG13953.3	NA	NA	-0.70981	0.000367615	3	3	0.611401	NA	gmst	complete	Na_Ca_ex|PF01699.24|8.5e-27	calcium, potassium:sodium antiporter activity		none	signal anchor	OG0000199	Archaeplastida	NA
EhG13973.1	NA	NA	-0.471003	0.000290831	3	3	0.721463	EhG41913	getorf	complete	NA	translation initiation factor activity	8738987391262080	none	other localisation	OG0000004	Archaeplastida	NA
EhG140.1	NA	NA	-0.160101	0.0243188	3	3	0.894962	EhG139,EhG29785	gmst	complete	NA	NA	96110104443	none	signal peptide	OG0009960	Prymnesiales	NA
EhG14046.1	NA	NA	-0.252411	0.0176229	3	3	0.839492	EhG38864	gmst	complete	Histone|PF00125.24|1.4e-19	protein heterodimerization activity	1.96782e+175	Description:Nucleosome assembly and biogenesis:Megan Sentman:2009-05-17 Model Notes:Slightly shorter than similar sequences:Megan Sentman:2009-05-17 Defline:putative Histone H2B:Megan Sentman:2009-05-17 EST evidence:No:Megan Sentman:2009-05-17	other localisation	OG0000429	Archaeplastida	NA
EhG14144.2	NA	NA	-0.219095	0.041752	3	3	0.859104	EhG31897	gmst	complete	THOC7|PF05615.13|4.8e-25	mRNA-containing ribonucleoprotein complex export from nucleus	350056	none	other localisation	OG0004377	Archaeplastida	NA
EhG1418.1	NA	NA	-1.04997	0.00314454	3	3	0.482979	EhG15756	gmst	complete	MTS|PF05175.14|7.8e-05,Methyltransf_23|PF13489.6|2.8e-10,Methyltransf_31|PF13847.6|4.5e-05,Methyltransf_11|PF08241.12|1.7e-06,Methyltransf_25|PF13649.6|7.9e-06	NA	273932316209	none	signal peptide	OG0008845	SAR/Hapista	NA
EhG14338.15	NA	NA	-0.404617	0.00600312	3	3	0.755437	EhG8891	gmst	complete	SAT|PF16073.5|0.00066,Acyl_transf_1|PF00698.21|7.2e-25	[acyl-carrier-protein] S-malonyltransferase activity	2.75038e+44	none	signal peptide	OG0000543	Archaeplastida	NA
EhG1435.4	NA	NA	-0.677241	0.000347675	3	3	0.62536	EhG15769	gmst	complete	Shikimate_DH|PF01488.20|7e-32,GlutR_dimer|PF00745.20|1.2e-24,GlutR_N|PF05201.15|4.9e-39	glutamyl-tRNA reductase activity		none	chloroplast	OG0001756	Archaeplastida	NA
EhG14531.1	NA	NA	-0.569593	0.00141327	2	2	0.673807	NA	gmst	complete	NA	NA		none	signal peptide	OG0054430	E_huxleyi	Coccolithophore specific in 1/6 species
EhG14678.4	NA	NA	-0.548626	0.00816169	3	3	0.683671	EhG29561	gmst	complete	PFK|PF00365.20|1.1e-58	6-phosphofructokinase activity		none	signal peptide	OG0000979	Archaeplastida	NA
EhG14688.2	NA	NA	-0.77424	0.000382568	3	3	0.584697	EhG29571	getorf	complete	NA	ribosomal protein		none	mitochondrion	OG0002193	Archaeplastida	NA
EhG14756.1	NA	NA	-0.308623	0.0264782	3	3	0.807412	EhG29635	gmst	complete	Chloroa_b-bind|PF00504.21|2.2e-29	Chlorophyll A-B binding protein	4.55005e+19	Name:Lhcf54:Stephane Lefebvre:2010-08-31 Description:Light harvesting chlorophyll a/c binding protein. Part of Lhcz & Lhcz-like group.:Stephane Lefebvre:2010-08-31 Model Notes:editing needed -- 5' only Possible alternative START codon upstream:Stephane Lefebvre:2010-08-31 Defline:Light harvesting protein:Stephane Lefebvre:2010-08-31	mitochondrion	OG0000018	Archaeplastida	NA
EhG14876.1	NA	NA	-0.232725	0.0313661	2	2	0.851026	EhG6362	gmst	complete	Vps35|PF03635.17|1.9e-209	negative regulation of late endosome to lysosome transport		none	other localisation	OG0001760	Archaeplastida	NA
EhG14940.1	NA	NA	-0.286946	0.0160389	3	3	0.819635	EhG14941,EhG6293	gmst	complete	MPC|PF03650.13|4.4e-17,MPC|PF03650.13|2.1e-24	mitochondrial pyruvate transmembrane transport	405851356784	none	signal anchor	OG0001311	Archaeplastida	NA
EhG15131.1	NA	NA	-0.765001	0.0311632	2	2	0.588453	EhG16383	gmst	complete	FA_desaturase|PF00487.24|4.1e-05,FA_desaturase|PF00487.24|1e-10	oxidoreductase activity, acting on paired donors, with oxidation of a pair of donors resulting in the reduction of molecular oxygen to two molecules of water	366826	none	other localisation	OG0000538	Archaeplastida	NA
EhG15307.1	NA	NA	-0.158443	0.0241597	3	3	0.895992	EhG25906	gmst	complete	Aldose_epim|PF01263.20|1.2e-41	glucose-6-phosphate 1-epimerase activity	352949	none	signal peptide	OG0000553	Archaeplastida	NA
EhG15320.1	NA	NA	-0.225116	0.0434715	2	2	0.855527	EhG25924	gmst	complete	PCI|PF01399.27|7.8e-22	protein deneddylation	2.67862e+17	none	other localisation	OG0001714	Archaeplastida	NA
EhG15409.3	NA	NA	-0.225606	0.0351755	3	3	0.855236	EhG34710	getorf	complete	NA	pre-mRNA branch point binding	2.05373e+23	none	signal peptide	OG0014235	Calcihaptophyta	NA
EhG15428.2	NA	NA	-0.255653	0.00601948	3	3	0.837608	EhG34734,EhG36081	gmst	complete	Cpn60_TCP1|PF00118.24|9.9e-153	unfolded protein binding		none	other localisation	OG0002754	Archaeplastida	NA
EhG15474.1	NA	NA	-0.425469	0.00456752	2	2	0.744597	EhG36126	gmst	complete	NMO|PF03060.15|1.4e-27	Nitronate monooxygenase	205471125550	Defline:2-nitropropane dioxygenase:Mark van der Giezen:2009-09-10	mitochondrion	OG0001111	Archaeplastida	NA
EhG1550.1	NA	NA	-0.290646	0.0387952	3	3	0.817536	EhG29709	gmst	complete	NA	NA	2.03639e+47	none	signal peptide	OG0040783	Phaocystales	NA
EhG15539.1	NA	NA	-0.330618	0.00161831	3	3	0.795196	EhG41093,EhG41094	gmst	complete	PSII_Pbs31|PF18240.1|6.6e-14	NA	2.05571e+29	none	other localisation	OG0003579	Archaeplastida	NA
EhG1558.1	NA	NA	-0.233804	0.00288458	3	3	0.85039	EhG29715	gmst	complete	HSP70|PF00012.20|4.5e-140,MreB_Mbl|PF06723.13|2.8e-10	ATP binding		none	other localisation	OG0000686	Archaeplastida	NA
EhG15699.1	NA	NA	-0.229241	0.00513615	3	3	0.853083	EhG1643,EhG1644	gmst	complete	NA	NA		none	other localisation	OG0003527	SAR/Hapista	NA
EhG15780.28	NA	NA	-0.258029	0.00243267	3	3	0.83623	EhG43309	getorf	complete	NA	methylenetetrahydrofolate reductase (NAD(P)H) activity	2.79591e+98	none	other localisation	OG0000749	Archaeplastida	NA
EhG15961.1	NA	NA	-0.308335	0.00591872	3	3	0.807573	EhG23507,EhG23508	gmst	complete	TauD|PF02668.16|1.2e-24	Taurine catabolism dioxygenase TauD, TfdA family	2.77705e+46	none	signal peptide	OG0001220	Archaeplastida	NA
EhG16000.1	NA	NA	-0.194173	0.0252078	3	3	0.874074	NA	getorf	complete	NA	barbed-end actin filament capping	46562	none	other localisation	OG0003459	Archaeplastida	NA
EhG16060.1	NA	NA	-0.585546	0.00322161	3	3	0.666397	EhG33663	gmst	complete	NA	NA	2.71169e+47	none	other localisation	OG0003710	E_huxleyi	NA
EhG16086.16	NA	NA	-0.272756	0.00179673	3	3	0.827737	EhG33697	gmst	complete	NA	geranylgeranyl diphosphate reductase activity		none	other localisation	OG0000898	Archaeplastida	NA
EhG16117.1	NA	NA	-0.961511	0.0108728	3	3	0.513519	EhG33723	gmst	complete	Fasciclin|PF02469.22|3e-15,Zip|PF02535.22|3e-17,Fasciclin|PF02469.22|6.3e-14	cellular zinc ion homeostasis		none	other localisation	OG0000592	Archaeplastida	NA
EhG1614.1	NA	NA	-0.209846	0.00546461	3	3	0.864629	EhG29768	gmst	complete	RGS|PF00615.19|1.7e-05,cNMP_binding|PF00027.29|1.2e-15,cNMP_binding|PF00027.29|2.7e-17,Pkinase|PF00069.25|1.6e-54,Pkinase_Tyr|PF07714.17|1.3e-28,GRAM|PF02893.20|1.2e-05	protein serine/threonine kinase activity		none	other localisation	OG0000647	Archaeplastida	NA
EhG16193.8	NA	NA	-0.166264	0.0154289	3	3	0.891147	EhG16192,EhG16194,EhG20700	transdec	complete	NA	NA		none	other localisation	OG0006439	Haptophyta	NA
EhG16222.1	NA	NA	-0.34495	0.0115368	2	2	0.787335	NA	gmst	complete	AhpC-TSA|PF00578.21|1.2e-05,Redoxin|PF08534.10|3.2e-21	peroxiredoxin activity	1.9633e+163	none	signal peptide	OG0000305	Archaeplastida	NA
EhG16278.1	NA	NA	-0.305323	0.0423997	2	2	0.809261	EhG15025	gmst	complete	Ribosomal_S5|PF00333.20|1.9e-18,Ribosomal_S5_C|PF03719.15|9e-15	structural constituent of ribosome	4.08467e+35	none	mitochondrion	OG0003174	Archaeplastida	NA
EhG1630.1	NA	NA	-0.223677	0.00501717	3	3	0.85638	EhG15709	gmst	complete	NA	Chalcone isomerase-like	207889	none	signal peptide	OG0006179	Archaeplastida	NA
EhG1631.5	NA	NA	-0.819927	4.9711e-05	3	3	0.56647	EhG15708	gmst	complete	DAO|PF01266.24|4.1e-37,DAO_C|PF16901.5|1.4e-37,FAD_binding_2|PF00890.24|1.3e-07,Pyr_redox_2|PF07992.14|0.00081	sn-glycerol-3-phosphate:ubiquinone-8 oxidoreductase activity		none	other localisation	OG0001171	Archaeplastida	NA
EhG16622.1	NA	NA	-0.147543	0.0204437	3	3	0.902786	EhG19027	gmst	5primepartial	Helicase_C|PF00271.31|1.3e-27,GUCT|PF08152.12|3.6e-07,DEAD|PF00270.29|8.4e-19	helicase activity		none	other localisation	OG0000794	Archaeplastida	NA
EhG16821.2	NA	NA	-0.190354	0.0206632	3	3	0.876391	EhG22432	gmst	complete	NA	NA	2.11538e+23	none	other localisation	OG0009965	Phaocystales	NA
EhG16827.1	NA	NA	-0.275228	0.0167779	2	2	0.82632	EhG22423,EhG44432	transdec	complete	NA	NA	211530	none	other localisation	OG0008262	Phaocystales	NA
EhG16963.8	NA	NA	-0.362071	0.00962925	3	3	0.778047	NA	gmst	complete	Mtc|PF03820.17|7.8e-75	ion transmembrane transporter activity	4.37274e+29	Defline:Sideroflexin:Bryony Williams:2009-09-10	signal peptide	OG0001786	Archaeplastida	NA
EhG17137.1	NA	NA	-0.227062	0.0156831	3	3	0.854373	EhG13682,EhG24949	gmst	complete	Ribosomal_L6e|PF01159.19|3.3e-37	60S ribosomal protein L6		none	other localisation	OG0001768	Archaeplastida	NA
EhG17157.2	NA	NA	-0.212397	0.0319927	3	3	0.863102	EhG13705	gmst	5primepartial	Methyltransf_12|PF08242.12|1.2e-08,Ubie_methyltran|PF01209.18|4.4e-13,Methyltransf_31|PF13847.6|1.1e-09,Methyltransf_11|PF08241.12|8.5e-16,Methyltransf_23|PF13489.6|7.7e-05,Methyltransf_25|PF13649.6|3.1e-16	response to karrikin	283185410726	none	signal peptide	OG0003541	Archaeplastida	NA
EhG17305.4	NA	NA	-0.557941	0.00709952	3	3	0.679271	EhG38303,EhG38304	getorf	complete	NA	Periplasmic binding protein	208302	none	other localisation	OG0000213	SAR/Hapista	NA
EhG17403.1	NA	NA	-0.200556	0.0333229	2	2	0.870215	EhG22247	gmst	complete	NA	NA		none	mitochondrion	OG0002013	Archaeplastida	NA
EhG17515.1	NA	NA	-0.267829	0.00821656	3	3	0.830568	EhG6112	gmst	complete	Calreticulin|PF00262.18|1.3e-126	unfolded protein binding	2.7777e+34	none	signal peptide	OG0001851	Archaeplastida	NA
EhG17569.1	NA	NA	-0.294827	0.00943643	3	3	0.81517	EhG41046	gmst	complete	HSP70|PF00012.20|1.4e-240,MreB_Mbl|PF06723.13|1.7e-14	ATP binding	253736	none	signal peptide	OG0000031	Archaeplastida	NA
EhG17593.1	NA	NA	-0.181445	0.0118017	3	3	0.881819	EhG6874	gmst	complete	GDI|PF00996.18|9.3e-71	Rab GDP-dissociation inhibitor activity		none	signal peptide	OG0009444	Phaocystales	NA
EhG17799.1	NA	NA	-0.333434	0.0143716	2	2	0.793645	EhG12402	gmst	complete	Apolipoprotein|PF01442.18|0.00016,DUF1664|PF07889.12|1.2e-05	NA	353228	none	mitochondrion	OG0017057	E_huxleyi	NA
EhG18.1	NA	NA	-0.211012	0.0305826	3	3	0.863931	EhG43665	gmst	complete	VWA_2|PF13519.6|3.5e-18,Ssl1|PF04056.14|0.00011	Protein of unknown function (DUF1631)		none	other localisation	OG0003038	Archaeplastida	NA
EhG1805.2	NA	NA	-0.471246	0.00153597	3	3	0.721341	EhG15548,EhG44332	gmst	5primepartial	Ephrin_rec_like|PF07699.13|2.8e-06,TIR_2|PF13676.6|1.4e-05,Ephrin_rec_like|PF07699.13|0.00035,Ephrin_rec_like|PF07699.13|3.8e-06	NA		none	other localisation	OG0018743	E_huxleyi	Coccolithophore specific in 1/6 species
EhG18090.1	NA	NA	-0.320074	0.00120529	3	3	0.801029	EhG570	gmst	complete	HATPase_c_3|PF13589.6|3.1e-10,HSP90|PF00183.18|3.6e-99,HATPase_c|PF02518.26|9.2e-11	unfolded protein binding		none	mitochondrion	OG0002042	Archaeplastida	NA
EhG18143.1	NA	NA	-0.241009	0.0106067	3	3	0.846153	EhG39566	gmst	complete	NA	NA	2.07361e+17	none	signal peptide	OG0010968	Phaocystales	NA
EhG18145.2	NA	NA	-0.440129	0.00423199	3	3	0.737069	EhG39568	getorf	complete	NA	structural constituent of ribosome	5.89636e+92	none	other localisation	OG0001945	Archaeplastida	NA
EhG18201.3	Ribosomal protein S6e		-0.691408	0.00470609	3	3	0.619249	EhG26766	gmst	5primepartial	Ribosomal_S6e|PF01092.19|8.7e-49	structural constituent of ribosome		none	other localisation	OG0001783	Archaeplastida	NA
EhG1823.3	NA	NA	-0.884198	0.0003533	3	3	0.541789	NA	gmst	complete	Gln-synt_N|PF03951.19|1.8e-13,Gln-synt_C|PF00120.24|6.8e-05	glutamine biosynthetic process		none	other localisation	OG0000763	Archaeplastida	NA
EhG18287.1	NA	NA	-0.15322	0.0285194	3	3	0.899241	NA	gmst	complete	Anticodon_1|PF08264.13|6e-25,tRNA-synt_1|PF00133.22|2.5e-218,tRNA-synt_1g|PF09334.11|1.5e-05	Belongs to the class-I aminoacyl-tRNA synthetase family	279039	none	other localisation	OG0001778	Archaeplastida	NA
EhG18388.1	NA	NA	-0.614415	0.00240406	3	3	0.653195	EhG1282	getorf	complete	NA	NA		none	other localisation	OG0013510	E_huxleyi	NA
EhG18436.1	NA	NA	-0.314386	0.00181226	3	3	0.804193	EhG1245	getorf	complete	NA	proteasome-mediated ubiquitin-dependent protein catabolic process	2.65664e+35	none	other localisation	OG0002053	Archaeplastida	NA
EhG18573.1	NA	NA	-0.497532	0.000432898	3	3	0.708317	EhG23882	getorf	complete	NA	NA	2.26623e+107	none	other localisation	OG0009962	Phaocystales	NA
EhG18622.14	NA	NA	-0.594674	0.000177188	3	3	0.662194	EhG23930	gmst	complete	Adap_comp_sub|PF00928.21|9.9e-80,Clat_adaptor_s|PF01217.20|7.5e-07	endocytosis		none	other localisation	OG0000330	Archaeplastida	NA
EhG1864.1	NA	NA	-0.213014	0.0131853	3	3	0.862733	EhG19294	gmst	complete	AAA|PF00004.29|6.1e-21	ATPase family associated with various cellular activities (AAA)		none	other localisation	OG0006196	Archaeplastida	NA
EhG187.7	NA	NA	-0.316726	0.00222481	3	3	0.80289	EhG20861	gmst	complete	NAD_binding_1|PF00175.21|3.1e-28	NADPH-hemoprotein reductase activity	2.66533e+23	none	signal peptide	OG0000218	Archaeplastida	NA
EhG18708.1	NA	NA	-0.235173	0.00491095	3	3	0.849583	EhG30591	gmst	complete	ANTH|PF07651.16|2.5e-06,ENTH|PF01417.20|1e-07,ENTH|PF01417.20|9.7e-05	ENTH domain	5.87696e+45	none	other localisation	OG0002231	Archaeplastida	NA
EhG18787.3	NA	NA	-0.197159	0.00733291	3	3	0.872266	EhG1982	gmst	5primepartial	NIR_SIR|PF01077.22|4.2e-09,NIR_SIR_ferr|PF03460.17|1.3e-16,NIR_SIR|PF01077.22|3.1e-33,NIR_SIR_ferr|PF03460.17|3.6e-17	Nitrite and sulphite reductase 4Fe-4S domain		none	other localisation	OG0001858	Archaeplastida	NA
EhG18919.3	NA	NA	-0.473389	0.000484161	3	3	0.720271	EhG16499	gmst	complete	Ribosomal_L18A|PF01775.17|8.8e-44	structural constituent of ribosome		none	other localisation	OG0001903	Archaeplastida	NA
EhG19010.1	NA	NA	-0.342868	0.00482554	3	3	0.788472	EhG16611	transdec	complete	Ribosomal_S30|PF04758.14|4.4e-30	structural constituent of ribosome	2.3909e+95	none	other localisation	OG0003807	Archaeplastida	NA
EhG19190.1	NA	NA	-0.130129	0.026264	3	3	0.91375	NA	gmst	complete	GATase_2|PF00310.21|2e-140,Glu_synthase|PF01645.17|6.4e-147,GXGXG|PF01493.19|1.4e-62,Glu_syn_central|PF04898.14|1.8e-97	L-glutamate biosynthetic process		none	chloroplast	OG0000520	Archaeplastida	NA
EhG19271.7	NA	NA	-0.11587	0.049494	3	3	0.922826	EhG1840	gmst	complete	B12-binding_2|PF02607.17|4.8e-23,S-methyl_trans|PF02574.16|1.2e-71,Met_synt_B12|PF02965.17|7.2e-116,B12-binding|PF02310.19|6.4e-16,Pterin_bind|PF00809.22|6.5e-46	betaine-homocysteine S-methyltransferase activity		none	other localisation	OG0000924	Archaeplastida	NA
EhG19357.1	NA	NA	-1.22577	0.000142285	3	3	0.427569	EhG33269	gmst	complete	NA	NA		none	other localisation	OG0005441	E_huxleyi	Coccolithophore specific in 1/6 species
EhG19385.18	NA	NA	-0.280785	0.00146036	3	3	0.823143	EhG19382,EhG33297	getorf	complete	NA	acetyl-CoA carboxylase		none	chloroplast	OG0000203	Archaeplastida	NA
EhG19407.1	NA	NA	-0.796259	0.0144413	3	3	0.57584	EhG19408,EhG33322,EhG33323	gmst	complete	F1F0-ATPsyn_F|PF10791.9|2.6e-06	NA		none	other localisation	OG0007879	Haptophyta	NA
EhG19435.1	NA	NA	-0.587077	0.00272158	3	3	0.66569	EhG25363	gmst	complete	Lycopene_cycl|PF05834.12|1.5e-05,GMC_oxred_N|PF00732.19|1.5e-77,NAD_binding_8|PF13450.6|0.00019,GMC_oxred_C|PF05199.13|2.9e-33	flavin adenine dinucleotide binding	2.82397e+44	none	signal peptide	OG0000297	Archaeplastida	NA
EhG19445.2	NA	NA	-0.33206	0.00286574	3	3	0.794401	EhG25372	gmst	complete	H_PPase|PF03030.16|4.2e-225	hydrogen-translocating pyrophosphatase activity	2.54107e+41	Defline:H+-translocating pyrophosphatase:Bryony Williams:2009-09-10	signal anchor	OG0000133	Archaeplastida	NA
EhG19504.1	NA	NA	-0.2371	0.00374942	3	3	0.848449	EhG25432	gmst	complete	GcpE|PF04551.14|3.2e-148	4-hydroxy-3-methylbut-2-en-1-yl diphosphate synthase activity	2.82833e+17	none	signal peptide	OG0002085	Archaeplastida	NA
EhG19539.2	NA	NA	-0.388559	0.00143599	3	3	0.763892	EhG20075,EhG20076	gmst	complete	F_bP_aldolase|PF01116.20|1.3e-87	fructose-bisphosphate aldolase activity		none	signal peptide	OG0000389	Archaeplastida	NA
EhG19595.1	NA	NA	-0.526105	0.00381408	2	2	0.694427	EhG20015	gmst	complete	NA	NA		none	other localisation	OG0040562	E_huxleyi	NA
EhG19753.1	NA	NA	-0.37281	0.00523152	3	3	0.772277	EhG21906	gmst	complete	URO-D|PF01208.17|1.1e-87	uroporphyrinogen decarboxylase activity	8.88589e+56	Name:UROD1:Sebastian Rokitta:2012-05-15 Description:Porphyrin synthesis:Sebastian Rokitta:2012-01-14 Defline:Uroporphyrinogen decarboxylase:Sebastian Rokitta:2012-01-12 null:ISS:Sebastian Rokitta:2012-01-12	chloroplast	OG0001201	Archaeplastida	NA
EhG19896.1	NA	NA	-0.295062	0.0156857	2	2	0.815037	EhG2562	gmst	complete	GNAT_acetyltr_2|PF13718.6|1e-87,Helicase_RecD|PF05127.14|2.4e-61,DUF1726|PF08351.11|1.6e-32,tRNA_bind_2|PF13725.6|3.9e-54	tRNA N-acetyltransferase activity		none	other localisation	OG0001879	Archaeplastida	NA
EhG19973.1	NA	NA	-0.165411	0.0372292	3	3	0.891674	EhG2491	gmst	complete	AAA_18|PF13238.6|2.2e-26,AAA_17|PF13207.6|4e-06	adenylate kinase activity		none	other localisation	OG0003607	Archaeplastida	NA
EhG20083.1	NA	NA	-0.380406	0.000450139	3	3	0.768221	EhG19527,EhG40257	gmst	complete	FKBP_C|PF00254.28|2.8e-31	peptidyl-prolyl cis-trans isomerase activity		none	signal peptide	OG0000021	Archaeplastida	NA
EhG20257.1	NA	NA	-0.152393	0.0280111	3	3	0.899757	EhG4793,EhG4809	gmst	complete	Transket_pyr|PF02779.24|6.4e-39,E1_dh|PF00676.20|2.9e-07,Transketolase_C|PF02780.20|0.00056,Transketolase_N|PF00456.21|4.9e-108	transketolase activity	8.82039e+67	none	signal peptide	OG0000535	Archaeplastida	NA
EhG20325.2	NA	NA	-0.197802	0.00813912	3	3	0.871878	EhG33633	gmst	complete	TPR_1|PF00515.28|8.1e-06,STI1|PF17830.1|3.7e-13,HipN|PF18253.1|5.4e-17	Hsp70 protein binding		none	other localisation	OG0001928	Archaeplastida	NA
EhG20614.2	NA	NA	-0.138659	0.0248241	3	3	0.908363	EhG38127	gmst	complete	Mito_carr|PF00153.27|1.1e-20,Mito_carr|PF00153.27|6.9e-13,Mito_carr|PF00153.27|2e-21	oxidative phosphorylation uncoupler activity		none	other localisation	OG0000143	Archaeplastida	NA
EhG20651.3	NA	NA	-0.225323	0.0129187	3	3	0.855404	EhG35759,EhG35761	gmst	complete	Hydrolase|PF00702.26|5.4e-18,Cation_ATPase|PF13246.6|2.2e-13,Cation_ATPase_C|PF00689.21|1.2e-52,Hydrolase_3|PF08282.12|0.00031,E1-E2_ATPase|PF00122.20|5.6e-46,Cation_ATPase_N|PF00690.26|9.5e-17	calcium-transporting ATPase activity		none	other localisation	OG0000145	Archaeplastida	NA
EhG20677.3	NA	NA	-0.161204	0.0195458	3	3	0.894278	EhG35733	gmst	complete	tRNA-synt_1c|PF00749.21|5.1e-94,WHEP-TRS|PF00458.20|5.5e-06,tRNA-synt_1c_C|PF03950.18|1.1e-27	glutamyl-tRNA aminoacylation		none	other localisation	OG0002441	Archaeplastida	NA
EhG20854.3	NA	NA	-0.251457	0.0156857	3	3	0.840048	EhG193	gmst	complete	NA	NA	2.14056e+59	none	other localisation	OG0011952	Isochrysidales	NA
EhG21217.1	NA	NA	-0.30296	0.0206484	3	3	0.810587	EhG38921	gmst	complete	Bestrophin|PF01062.21|2.8e-43	regulation of photosynthesis, light reaction	4.12733e+23	none	signal peptide	OG0000063	Archaeplastida	NA
EhG21352.1	NA	NA	-0.170048	0.0156831	3	3	0.888813	EhG10239	gmst	5primepartial	NA	NA	2.23216e+59	none	other localisation	OG0004847	Archaeplastida	NA
EhG21358.5	NA	NA	-0.294537	0.0280111	3	3	0.815334	EhG10245,EhG10246,EhG10248	getorf	complete	NA	Ribosomal L28 family		none	chloroplast	OG0005259	Archaeplastida	NA
EhG21498.2	NA	NA	-0.381835	0.0117122	3	3	0.767461	EhG13861	gmst	complete	NA	NA		none	chloroplast	OG0017045	Prymnesiales	NA
EhG21500.2	NA	NA	-0.957232	4.81904e-05	3	3	0.515044	EhG13855,EhG6437	gmst	complete	NA	NA		none	chloroplast	OG0005625	Phaocystales	NA
EhG21562.1	NA	NA	-0.234275	0.00781909	3	3	0.850112	EhG42504	gmst	5primepartial	MMR_HSR1|PF01926.23|2.7e-07,EFG_C|PF00679.24|4.3e-20,GTP_EFTU_D2|PF03144.25|0.00015,GTP_EFTU|PF00009.27|2.1e-49	GTPase activity		none	mitochondrion	OG0001138	Archaeplastida	NA
EhG21572.4	NA	NA	-0.118884	0.0464669	3	3	0.9209	EhG42493,EhG44585	gmst	complete	tRNA_bind|PF01588.20|1.4e-26,tRNA-synt_1|PF00133.22|2.6e-09,tRNA-synt_1g|PF09334.11|3.4e-38,tRNA-synt_1g|PF09334.11|4.5e-55,tRNA-synt_1|PF00133.22|1.9e-18,tRNA-synt_1e|PF01406.19|4.7e-05,NDK|PF00334.19|1.1e-08,tRNA-synt_1e|PF01406.19|0.0001	methionyl-tRNA aminoacylation		none	other localisation	OG0001049	Archaeplastida	NA
EhG21758.1	NA	NA	-0.329621	0.040487	3	3	0.795745	EhG43490	getorf	complete	NA	peptidyl-prolyl cis-trans isomerase activity	2.15851e+47	none	other localisation	OG0000707	Archaeplastida	NA
EhG21848.1	NA	NA	-0.349911	0.00632474	3	3	0.784632	EhG42157	gmst	complete	NA	NA	2.15996e+17	none	chloroplast	OG0002642	Phaocystales	NA
EhG21849.1	NA	NA	-0.229602	0.00986858	3	3	0.85287	EhG42156	gmst	complete	Acyl-CoA_dh_N|PF02771.16|2.1e-34,Acyl-CoA_dh_2|PF08028.11|3.2e-23,Acyl-CoA_dh_M|PF02770.19|2e-27,Acyl-CoA_dh_1|PF00441.24|3.9e-49	oxidoreductase activity, acting on the CH-CH group of donors, with a flavin as acceptor		none	mitochondrion	OG0000166	Archaeplastida	NA
EhG21871.1	NA	NA	-0.178976	0.0333229	3	3	0.88333	EhG44205	gmst	complete	tRNA_bind|PF01588.20|1.2e-26	tRNA binding	4.89687e+20	none	mitochondrion	OG0000457	Archaeplastida	NA
EhG21874.7	NA	NA	-0.322865	0.00216031	3	3	0.799481	NA	gmst	complete	CPSase_L_D2|PF02786.17|5.5e-80,ATP-grasp|PF02222.22|7.2e-08,ATPgrasp_Ter|PF15632.6|9.4e-07,Dala_Dala_lig_C|PF07478.13|0.00079,GATase|PF00117.28|6.9e-43,CPSase_L_D3|PF02787.19|4.4e-35,MGS|PF02142.22|1.4e-11,ATP-grasp|PF02222.22|0.00019,Dala_Dala_lig_C|PF07478.13|0.00099,CPSase_sm_chain|PF00988.22|2.2e-50,ATPgrasp_Ter|PF15632.6|0.00023,CPSase_L_D2|PF02786.17|2.2e-22	carbamoyl-phosphate synthase (glutamine-hydrolyzing) activity		none	other localisation	OG0000379	Archaeplastida	NA
EhG21927.2	NA	NA	-0.397506	0.000454857	3	3	0.75917	EhG19732	gmst	complete	ShK|PF01549.24|0.00033,ShK|PF01549.24|0.0004,ShK|PF01549.24|2.3e-07,ShK|PF01549.24|1.7e-07,ShK|PF01549.24|4.5e-09,ShK|PF01549.24|6.1e-08	NA		none	other localisation	OG0023371	E_huxleyi	Coccolithophore specific in 1/6 species
EhG22001.39	NA	NA	-0.664439	0.000109404	3	3	0.630934	EhG8424	gmst	complete	EFG_II|PF14492.6|1.4e-13,EFG_IV|PF03764.18|1.9e-31,GTP_EFTU_D2|PF03144.25|1.1e-12,MMR_HSR1|PF01926.23|0.00017,EFG_C|PF00679.24|3.1e-18,GTP_EFTU|PF00009.27|4.1e-62	translation elongation factor activity	2.75806e+23	none	other localisation	OG0000363	Archaeplastida	NA
EhG22029.2	NA	NA	-0.397579	0.000689056	3	3	0.759131	EhG8452	gmst	complete	polyprenyl_synt|PF00348.17|3.3e-78	dimethylallyltranstransferase activity	1.97438e+105	none	signal peptide	OG0001510	Archaeplastida	NA
EhG22071.5	NA	NA	-0.503629	0.000260159	3	3	0.70533	EhG8492	getorf	complete	NA	positive regulation of translational fidelity	4.66126e+52	none	other localisation	OG0001899	Archaeplastida	NA
EhG22133.1	NA	NA	-0.300304	0.00184145	3	3	0.812081	EhG8564	gmst	complete	B2-adapt-app_C|PF09066.10|3.8e-19,Cnd1|PF12717.7|2.6e-62,Alpha_adaptinC2|PF02883.20|6.7e-05,Adaptin_N|PF01602.20|1.4e-151,Cnd3|PF12719.7|0.00026,HEAT_2|PF13646.6|2.7e-05	intracellular protein transport		none	other localisation	OG0000405	Archaeplastida	NA
EhG22147.5	NA	NA	-0.43375	0.0256008	3	3	0.740335	EhG8579	getorf	complete	NA	1,3-beta-D-glucan synthase activity		none	other localisation	OG0000210	Archaeplastida	NA
EhG22148.2	NA	NA	-0.442534	0.015737	2	2	0.735841	EhG8580	gmst	complete	ShK|PF01549.24|1.2e-09,ShK|PF01549.24|3.9e-09,ShK|PF01549.24|2.3e-09,ShK|PF01549.24|1.5e-07	NA		none	signal peptide	OG0001265	Haptophyta	NA
EhG22152.1	NA	NA	-0.250214	0.0373737	2	2	0.840772	EhG8585	gmst	5primepartial	LSM|PF01423.22|3.6e-20	cytoplasmic mRNA processing body assembly		none	other localisation	OG0004515	Archaeplastida	NA
EhG2222.2	NA	NA	-0.201897	0.0232996	3	3	0.869407	EhG13422	gmst	complete	Ran_BP1|PF00638.18|6.5e-40	Ran GTPase binding		none	other localisation	OG0001882	Archaeplastida	NA
EhG22294.2	NA	NA	-0.321314	0.0261773	3	3	0.80034	EhG17443	getorf	complete	NA	NA	2.13047e+41	none	chloroplast	OG0001654	Archaeplastida	NA
EhG22336.2	NA	NA	-0.61332	0.000584557	3	3	0.653691	EhG16919,EhG34308	gmst	complete	NA	NA		none	signal peptide	OG0007605	Phaocystales	NA
EhG22535.1	NA	NA	-0.148821	0.0244715	3	3	0.901988	EhG35498	gmst	complete	PH|PF00169.29|3.3e-16	NA		none	other localisation	OG0007202	Archaeplastida	NA
EhG22593.15	NA	NA	-0.236167	0.00700591	3	3	0.848998	EhG35557	gmst	complete	NAD_Gly3P_dh_C|PF07479.14|1.2e-47,NAD_Gly3P_dh_N|PF01210.23|1.7e-38	glycerol-3-phosphate catabolic process		none	mitochondrion	OG0000403	Archaeplastida	NA
EhG22797.4	NA	NA	-0.406692	0.00317782	3	3	0.754351	NA	gmst	complete	NA	NA		none	other localisation	OG0004710	Phaocystales	NA
EhG22866.2	NA	NA	-0.205311	0.00548554	3	3	0.867352	EhG5714	gmst	complete	COX5B|PF01215.19|2.8e-11	oxidoreductase activity, acting on a heme group of donors, oxygen as acceptor	2.0297e+65	none	mitochondrion	OG0002412	Archaeplastida	NA
EhG22903.1	NA	NA	-0.207547	0.0431932	2	2	0.866008	EhG5756	gmst	complete	EF-hand_5|PF13202.6|6.1e-05,EF-hand_1|PF00036.32|0.00081	NA		none	signal peptide	OG0008620	Archaeplastida	NA
EhG22956.3	NA	NA	-0.12205	0.0472823	3	3	0.918881	EhG41243	gmst	complete	GUN4|PF05419.12|5.1e-42	GUN4-like	8.69989e+83	none	signal peptide	OG0004279	Archaeplastida	NA
EhG23197.1	NA	NA	-0.313605	0.00184145	3	3	0.804629	EhG7977	gmst	complete	NIR_SIR_ferr|PF03460.17|1.1e-15,NIR_SIR|PF01077.22|9.3e-30,NIR_SIR_ferr|PF03460.17|1.4e-18,NIR_SIR|PF01077.22|2.4e-10	sulfite reductase (ferredoxin) activity	271302109295	none	other localisation	OG0001858	Archaeplastida	NA
EhG23204.1	NA	NA	-0.169162	0.0313661	3	3	0.889359	EhG7979	gmst	complete	NA	NA	2.24412e+23	none	signal peptide	OG0004392	Archaeplastida	NA
EhG23217.1	NA	NA	-0.419312	0.045153	3	3	0.747781	EhG7989	gmst	complete	Ribosomal_L27A|PF00828.19|9.5e-28	structural constituent of ribosome	28129288946	none	signal peptide	OG0001164	Archaeplastida	NA
EhG23231.1	NA	NA	-0.256011	0.0104849	3	3	0.8374	EhG7999	gmst	complete	PDT|PF00800.18|4.9e-49,PDH|PF02153.17|3.2e-14,F420_oxidored|PF03807.17|7.7e-08,Aminotran_1_2|PF00155.21|1.5e-63,Aminotran_5|PF00266.19|0.00022,DegT_DnrJ_EryC1|PF01041.17|3.5e-06	prephenate dehydrogenase (NADP+) activity	361693367562	none	other localisation	OG0001239	Archaeplastida	NA
EhG23254.1	NA	NA	-0.260413	0.00435131	3	3	0.834849	EhG35012	gmst	5primepartial	AMP-binding|PF00501.28|9.3e-86,ACAS_N|PF16177.5|8.1e-21,AMP-binding_C|PF13193.6|9.3e-23	synthetase		none	signal peptide	OG0000578	Archaeplastida	NA
EhG23255.1	NA	NA	-0.424247	0.000389156	3	3	0.745228	EhG35013	gmst	complete	FtsZ_C|PF12327.8|4.4e-31,Tubulin|PF00091.25|1.2e-38	chloroplast fission		none	signal peptide	OG0000758	Archaeplastida	NA
EhG23268.2	NA	NA	-0.302692	0.00143599	3	3	0.810738	EhG35024	gmst	complete	HATPase_c|PF02518.26|7.2e-12,HSP90|PF00183.18|8e-159,HATPase_c_3|PF13589.6|2.7e-11	unfolded protein binding	8.75259e+54	none	signal peptide	OG0000110	Archaeplastida	NA
EhG2329.4	NA	NA	-0.421332	0.00190886	3	3	0.746735	EhG13313	gmst	complete	PALP|PF00291.25|9.7e-64,Glutaredoxin|PF00462.24|1e-07	cysteine biosynthetic process from serine	4.10144e+23	none	other localisation	OG0000128	Archaeplastida	NA
EhG23478.1	NA	NA	-0.199546	0.015474	3	3	0.870825	EhG15989	gmst	complete	Chloroa_b-bind|PF00504.21|2.8e-29	Chlorophyll A-B binding protein		none	signal peptide	OG0000209	SAR/Hapista	NA
EhG23512.1	NA	NA	-0.293381	0.00116196	3	3	0.815988	EhG15958	gmst	complete	HGTP_anticodon|PF03129.20|8.9e-20,tRNA_edit|PF04073.15|8.1e-22,ProRS-C_1|PF09180.11|7.8e-21,tRNA-synt_2b|PF00587.25|8e-18	synthetase		none	other localisation	OG0000878	Archaeplastida	NA
EhG23702.91	NA	NA	-0.207935	0.00486706	3	3	0.865775	EhG12051,EhG12052	gmst	complete	F_bP_aldolase|PF01116.20|1.4e-86	fructose-bisphosphate aldolase activity	8.77119e+39	none	other localisation	OG0000389	Archaeplastida	NA
EhG23723.2	NA	NA	-0.257721	0.00424848	3	3	0.836408	EhG12036	gmst	complete	S1|PF00575.23|7.8e-15,S1|PF00575.23|6.2e-13	translation elongation factor activity	2.69116e+53	none	chloroplast	OG0001382	Archaeplastida	NA
EhG23775.2	NA	NA	-0.264098	0.0115851	3	3	0.832719	EhG11989	gmst	complete	Aldose_epim|PF01263.20|7.1e-34	glucose-6-phosphate 1-epimerase activity	2.80065e+44	none	other localisation	OG0000553	Archaeplastida	NA
EhG23862.1	NA	NA	-0.270222	0.0178717	3	3	0.829192	EhG18554	gmst	complete	AAA_21|PF13304.6|2e-08,ABC_tran|PF00005.27|2.7e-17,ABC_tran|PF00005.27|5.1e-14,AAA_21|PF13304.6|0.00073	ATPase activity		none	other localisation	OG0001587	Archaeplastida	NA
EhG23915.1	NA	NA	-0.507785	0.000157244	3	3	0.703301	EhG18606	gmst	complete	Chloroa_b-bind|PF00504.21|2.1e-22	Chlorophyll A-B binding protein		none	other localisation	OG0001538	SAR/Hapista	NA
EhG23918.10	NA	NA	-0.155806	0.045153	3	3	0.897631	EhG18610	gmst	complete	UDPG_MGDP_dh_N|PF03721.14|3.7e-59,UDPG_MGDP_dh_C|PF03720.15|1.2e-33,UDPG_MGDP_dh|PF00984.19|4.3e-30	UDP-glucose 6-dehydrogenase activity		none	other localisation	OG0000683	Archaeplastida	NA
EhG23935.1	NA	NA	-0.29588	0.00709952	3	3	0.814576	EhG18632	gmst	complete	NA	NA		none	other localisation	OG0022871	Calcihaptophyta	Coccolithophore specific in Gephyrocapsa Zygodiscales Coccolithales
EhG24010.1	NA	NA	-0.164956	0.046341	3	3	0.891956	NA	getorf	complete	NA	indole-3-glycerol-phosphate synthase activity		none	signal peptide	OG0004398	Archaeplastida	NA
EhG24012.1	NA	NA	-1.01006	4.45389e-05	3	3	0.496524	EhG11566	gmst	complete	Fea1|PF07692.11|2.2e-10,Fea1|PF07692.11|4.1e-12,Fea1|PF07692.11|1.4e-09	NA		none	signal peptide	OG0000262	Archaeplastida	NA
EhG24014.1	NA	NA	-0.231663	0.00402668	3	3	0.851652	EhG11564	gmst	complete	NA	NA	2.70528e+17	none	signal peptide	OG0002796	Archaeplastida	NA
EhG24023.2	NA	NA	-0.260498	0.0105823	3	3	0.8348	EhG11555	gmst	complete	Nop|PF01798.18|2.7e-89,NOP5NT|PF08156.13|2.9e-15	snoRNA binding	4.04144e+47	none	other localisation	OG0000712	Archaeplastida	NA
EhG24046.2	NA	NA	-0.324738	0.000815685	3	3	0.798443	EhG2462	gmst	complete	NAD_binding_2|PF03446.15|0.00054,OCD_Mu_crystall|PF02423.15|1.4e-59	thiomorpholine-carboxylate dehydrogenase activity	280360270536	none	mitochondrion	OG0003494	Archaeplastida	NA
EhG24101.1	NA	NA	-0.17568	0.0151157	3	3	0.88535	EhG2446	gmst	5primepartial	Fer2|PF00111.27|1.2e-09	2Fe-2S iron-sulfur cluster binding domain	219518	none	chloroplast	OG0003471	Archaeplastida	NA
EhG24174.1	NA	NA	-0.253656	0.0138709	3	3	0.838768	EhG10719	gmst	complete	NA	NA		none	signal peptide	OG0000820	Archaeplastida	NA
EhG24176.1	NA	NA	-0.304986	0.00109039	3	3	0.80945	EhG10721	gmst	complete	NA	NA		none	other localisation	OG0005209	Phaocystales	NA
EhG24236.3	NA	NA	-0.661421	0.00428869	2	2	0.632255	NA	transdec	complete	NA	NA		none	mitochondrion	OG0054304	E_huxleyi	Coccolithophore specific in 1/6 species
EhG24259.1	NA	NA	-0.291852	0.0247172	3	3	0.816853	NA	gmst	complete	Histone|PF00125.24|4.5e-13,CBFD_NFYB_HMF|PF00808.23|3.6e-05,Histone_H2A_C|PF16211.5|8.8e-20	Histone H2A	1.95431e+106	Description:Nucleosome assembly and DNA binding:Megan Sentman:2009-05-17 Defline:putative Histone H2A:Megan Sentman:2009-05-17 EST evidence:No:Megan Sentman:2009-05-17	other localisation	OG0000214	Archaeplastida	NA
EhG24295.1	NA	NA	-0.817501	4.45389e-05	3	3	0.567424	EhG3008	gmst	complete	V-ATPase_H_C|PF11698.8|6e-39,V-ATPase_H_N|PF03224.14|4.5e-58,Arm|PF00514.23|9.5e-05	V-type proton ATPase subunit		none	other localisation	OG0001297	Archaeplastida	NA
EhG24526.1	NA	NA	-0.329738	0.0225621	2	2	0.795681	EhG43284	getorf	complete	NA	carbohydrate transport		none	mitochondrion	OG0000057	Archaeplastida	NA
EhG24536.1	NA	NA	-0.116568	0.0464669	3	3	0.922379	EhG43293	gmst	complete	Cpn60_TCP1|PF00118.24|7e-143	chaperone mediated protein folding independent of cofactor	282005	none	other localisation	OG0002686	Archaeplastida	NA
EhG24659.3	NA	NA	-0.186269	0.016738	3	3	0.878876	EhG39292	gmst	complete	Ribosomal_L11|PF00298.19|2e-23,Ribosomal_L11_N|PF03946.14|1.6e-30	rRNA binding	2.80941e+35	none	signal peptide	OG0001617	Archaeplastida	NA
EhG24688.1	NA	NA	-0.459365	0.000606721	3	3	0.727306	EhG39317	getorf	complete	NA	photosynthesis	4.11367e+35	none	signal peptide	OG0000185	SAR/Hapista	NA
EhG24742.3	NA	NA	-1.22659	0.00108296	3	3	0.427327	EhG37479	getorf	complete	NA	NA		none	chloroplast	OG0041197	E_huxleyi	Coccolithophore specific in 1/6 species
EhG24783.1	NA	NA	-0.61473	0.00142811	3	3	0.653052	EhG31085,EhG31086	gmst	complete	NA	NA		none	other localisation	OG0011049	Calcihaptophyta	Coccolithophore specific in 5/6 species
EhG25091.16	NA	NA	-0.233622	0.00514305	3	3	0.850497	EhG12801,EhG12846,EhG12866,EhG14038,EhG14113,EhG16686,EhG16690,EhG22926,EhG25090,EhG31343,EhG31344,EhG31365,EhG31828,EhG31846,EhG32569,EhG32570,EhG32885,EhG32922,EhG33915,EhG33916,EhG37221,EhG37222,EhG37223,EhG39191,EhG39192,EhG39383,EhG39384,EhG43899,EhG43906,EhG44043,EhG44044,EhG5781,EhG5782	gmst	complete	H_PPase|PF03030.16|5e-225	hydrogen-translocating pyrophosphatase activity		none	signal peptide	OG0000133	Archaeplastida	NA
EhG25124.2	NA	NA	-0.19268	0.0137131	3	3	0.874979	EhG32644	gmst	complete	EPSP_synthase|PF00275.20|1.2e-111,SKI|PF01202.22|1.6e-23,Fe-ADH_2|PF13685.6|6.7e-09,Shikimate_DH|PF01488.20|1.4e-05,SDH_C|PF18317.1|3.5e-08,DHQ_synthase|PF01761.20|5.2e-94,DHquinase_I|PF01487.15|4.9e-40,Shikimate_dh_N|PF08501.11|6.9e-21	shikimate 3-dehydrogenase (NADP+) activity		none	other localisation	OG0000399	Archaeplastida	NA
EhG25139.2	NA	NA	-0.249508	0.0413653	3	3	0.841183	EhG32628	gmst	complete	Ribosomal_L35Ae|PF01247.18|1.1e-43	structural constituent of ribosome	8.97469e+32	none	other localisation	OG0001298	Archaeplastida	NA
EhG25158.1	NA	NA	-0.321726	0.00905186	3	3	0.800112	EhG32607	gmst	complete	WW|PF00397.26|2.5e-09	NA		none	other localisation	OG0000603	Archaeplastida	NA
EhG2520.1	NA	NA	-0.181042	0.0465934	2	2	0.882066	EhG19946	gmst	complete	DUF89|PF01937.19|1.8e-67	protein carboxyl O-methyltransferase activity		none	other localisation	OG0002777	Archaeplastida	NA
EhG25275.4	NA	NA	-0.353673	0.00222235	3	3	0.782589	EhG32845,EhG32846	getorf	complete	NA	Chlorophyll A-B binding protein	4.58359e+45	none	other localisation	OG0000018	Archaeplastida	NA
EhG25284.1	NA	NA	-0.161031	0.0306691	3	3	0.894386	EhG32836	gmst	complete	VIT1|PF01988.19|2.4e-49	cellular manganese ion homeostasis		none	other localisation	OG0000893	Archaeplastida	NA
EhG25291.1	NA	NA	-0.403976	0.0189014	2	2	0.755772	NA	gmst	complete	TPR_1|PF00515.28|0.00044,TPR_1|PF00515.28|2.7e-05,TPR_12|PF13424.6|0.00018,TPR_11|PF13414.6|0.00058,TPR_19|PF14559.6|1.9e-05,TPR_14|PF13428.6|0.00036	protein transmembrane transport	47207	none	signal anchor	OG0005177	SAR/Hapista	NA
EhG25313.1	NA	NA	-0.444257	0.000253397	3	3	0.734962	EhG42893	gmst	complete	GDI|PF00996.18|2.4e-141	Rab GDP-dissociation inhibitor activity	358674	none	other localisation	OG0000678	Archaeplastida	NA
EhG25441.1	NA	NA	-0.339273	0.00180297	3	3	0.790439	EhG21640	gmst	complete	IMP2_N|PF18590.1|1.4e-19,IMP2_C|PF18591.1|0.00053	NA	409872364397	none	other localisation	OG0001816	SAR/Hapista	NA
EhG25454.3	NA	NA	-0.505284	0.00107296	3	3	0.704522	EhG21660	gmst	complete	Ribosomal_L27A|PF00828.19|1.7e-16	structural constituent of ribosome	4950075820	none	other localisation	OG0002152	Archaeplastida	NA
EhG25472.7	NA	NA	-0.213616	0.016738	3	3	0.862373	EhG21683	gmst	complete	MTP18|PF10558.9|2.6e-06	Mitochondrial 18 KDa protein (MTP18)		none	signal peptide	OG0003098	Archaeplastida	NA
EhG25577.2	NA	NA	-0.228703	0.0444585	3	3	0.853402	EhG30481	gmst	5primepartial	RRM_1|PF00076.22|3.6e-16,RRM_5|PF13893.6|3.2e-06	RNA splicing		none	mitochondrion	OG0003025	Archaeplastida	NA
EhG25598.4	NA	NA	-0.206165	0.0212627	3	3	0.866839	EhG25597,EhG30444,EhG30445	getorf	complete	NA	ribosomal large subunit biogenesis		none	other localisation	OG0023319	E_huxleyi	NA
EhG25631.2	NA	NA	-0.525531	0.00239666	3	3	0.694703	EhG30407	gmst	complete	H_PPase|PF03030.16|7.2e-230	hydrogen-translocating pyrophosphatase activity	2.01272e+91	none	other localisation	OG0000133	Archaeplastida	NA
EhG25739.1	NA	NA	-0.138396	0.0258501	3	3	0.908529	EhG42755	getorf	complete	NA	glucose-6-phosphate isomerase activity		none	other localisation	OG0001142	Archaeplastida	NA
EhG25759.1	NA	NA	-0.220018	0.00522068	3	3	0.858554	EhG40326	getorf	complete	NA	Belongs to the universal ribosomal protein uL23 family		none	other localisation	OG0002048	Archaeplastida	NA
EhG25779.12	NA	NA	-0.477276	0.00166522	3	3	0.718333	EhG40304	gmst	complete	Ribosomal_L2_C|PF03947.18|2.5e-43,Ribosomal_L2|PF00181.23|3.8e-15	structural constituent of ribosome	8.67079e+38	none	other localisation	OG0000833	Archaeplastida	NA
EhG25916.5	NA	NA	-0.397434	0.00130704	3	3	0.759207	EhG15315	gmst	complete	Gp_dh_C|PF02800.20|1.9e-61,Gp_dh_N|PF00044.24|3.3e-31	glyceraldehyde-3-phosphate dehydrogenase (NAD(P)+) (phosphorylating) activity	7.90858e+41	none	other localisation	OG0000137	Archaeplastida	NA
EhG25947.1	NA	NA	-0.386982	0.00659007	3	3	0.764727	NA	gmst	complete	Actin|PF00022.19|2.1e-148	cytoskeleton organization		none	other localisation	OG0000027	Archaeplastida	NA
EhG2596.162	NA	NA	-0.606412	0.00705953	2	2	0.656828	EhG19869	gmst	5primepartial	GTP_EFTU_D3|PF03143.17|5.5e-12,GTP_EFTU_D2|PF03144.25|7.4e-05	regulation of response to stimulus		none	mitochondrion	NA	E_huxleyi	No Orthogroup
EhG2596.6	NA	NA	-0.375679	0.000597044	3	3	0.770743	EhG19869	gmst	complete	GTP_EFTU_D2|PF03144.25|7.6e-08,GTP_EFTU|PF00009.27|6.1e-43,GTP_EFTU_D3|PF03143.17|1.2e-11	regulation of response to stimulus		none	other localisation	OG0000081	Archaeplastida	NA
EhG25994.2	NA	NA	-0.302461	0.0017868	3	3	0.810868	EhG11481	gmst	complete	MFAP1|PF06991.11|0.00019,Cwf_Cwc_15|PF04889.12|4e-50	Cwf15 Cwc15 cell cycle control protein. This family represents Cwf15 Cwc15 (from Schizosaccharomyces pombe and Saccharomyces cerevisiae respectively) and their homologues		none	other localisation	OG0003340	Archaeplastida	NA
EhG26030.1	NA	NA	-0.216542	0.00775925	3	3	0.860626	EhG11523	gmst	complete	SQS_PSY|PF00494.19|1.1e-73	farnesyl-diphosphate farnesyltransferase activity		none	signal peptide	OG0001535	Archaeplastida	NA
EhG26194.1	NA	NA	-0.906027	0.000374093	3	3	0.533653	EhG20248,EhG20285,EhG32345,EhG37484	gmst	complete	NA	Berberine and berberine like	2.85505e+17	none	mitochondrion	OG0015683	Gephyrocapsa	Coccolithophore specific in 2/6 species
EhG26244.1	NA	NA	-0.253098	0.00421716	3	3	0.839092	EhG13258	gmst	complete	Ribos_L4_asso_C|PF14374.6|1e-21,Ribosomal_L4|PF00573.22|8.3e-42	structural constituent of ribosome		none	other localisation	OG0001695	Archaeplastida	NA
EhG26302.1	NA	NA	-0.192773	0.0167918	3	3	0.874922	EhG13202	gmst	complete	AcylCoA_DH_N|PF12418.8|1.1e-05,Acyl-CoA_dh_1|PF00441.24|2.6e-20,Acyl-CoA_dh_N|PF02771.16|1.7e-15,Acyl-CoA_dh_M|PF02770.19|1.1e-18,Acyl-CoA_dh_C|PF12806.7|4.2e-18	isovaleryl-CoA dehydrogenase activity		none	mitochondrion	OG0001814	Archaeplastida	NA
EhG26347.1	NA	NA	-0.19259	0.0291545	3	3	0.875034	EhG37349	gmst	complete	NA	translation initiation factor activity		none	other localisation	OG0002436	Archaeplastida	NA
EhG26375.1	NA	NA	-0.364651	0.00125187	3	3	0.776657	NA	getorf	complete	NA	NA		none	signal peptide	OG0033090	E_huxleyi	NA
EhG26406.4	NA	NA	-0.570903	0.00709952	2	2	0.673196	EhG30145	gmst	complete	NA	NA	211725	none	signal peptide	OG0040986	Gephyrocapsa	Coccolithophore specific in 2/6 species
EhG26415.6	NA	NA	-0.122686	0.0350347	3	3	0.918476	EhG26002,EhG30139,EhG30140	gmst	complete	Actin|PF00022.19|1.4e-39,Actin|PF00022.19|6.7e-87	cytoskeleton organization		none	other localisation	NA	E_huxleyi	No Orthogroup
EhG26441.2	NA	NA	-0.23082	0.00436972	3	3	0.85215	EhG36550,EhG9119	gmst	complete	adh_short|PF00106.25|1.5e-17	oxidation-reduction process		none	chloroplast	OG0000844	Archaeplastida	NA
EhG26490.1	NA	NA	-0.328584	0.0111176	2	2	0.796318	EhG9162	getorf	complete	NA	NA	202705246159	none	signal peptide	OG0040619	E_huxleyi	NA
EhG26491.1	NA	NA	-0.366983	0.00225561	3	3	0.775402	NA	gmst	complete	NA	heat shock protein binding		none	other localisation	OG0008721	Prymnesiales	NA
EhG2650.1	NA	NA	-0.707488	0.002934	3	3	0.612386	NA	gmst	complete	ECH_2|PF16113.5|7.4e-13,ECH_1|PF00378.20|1.2e-32	enoyl-CoA delta isomerase 2	2.01499e+40	Defline:Enoyl-CoA hydratase:Bryony Williams:2009-09-10	mitochondrion	OG0004169	Archaeplastida	NA
EhG26540.3	NA	NA	-0.183175	0.0109305	3	3	0.880763	EhG9207	gmst	complete	Biotin_carb_N|PF00289.22|2.4e-29,Biotin_lipoyl|PF00364.22|4.7e-07,ATP-grasp_3|PF02655.14|0.00017,Carboxyl_trans|PF01039.22|5.9e-143,ACC_central|PF08326.12|1e-33,Biotin_carb_C|PF02785.19|1.9e-18,CPSase_L_D2|PF02786.17|6.9e-51,ATP-grasp|PF02222.22|0.00037,ACC_central|PF08326.12|3.6e-24	acetyl-CoA carboxylase		none	other localisation	OG0000203	Archaeplastida	NA
EhG26677.1	NA	NA	-0.336656	0.0106049	3	3	0.791875	NA	gmst	complete	AAA|PF00004.29|5.3e-18,AAA_16|PF13191.6|0.0008	respiratory chain complex III assembly	7.54249e+51	Defline:putative Mitochondrial chaperone BCS1:Mark van der Giezen:2009-09-10	other localisation	OG0000465	Archaeplastida	NA
EhG26806.1	NA	NA	-0.321486	0.00492389	3	3	0.800245	EhG18236	gmst	complete	NA	NA		none	other localisation	OG0032871	E_huxleyi	Coccolithophore specific in 1/6 species
EhG26815.1	NA	NA	-0.430032	0.00375609	3	3	0.742245	EhG18243	gmst	complete	Acyltransferase|PF01553.21|6.9e-27	1-acylglycerol-3-phosphate O-acyltransferase activity		none	chloroplast	OG0001203	Archaeplastida	NA
EhG26854.1	NA	NA	-0.1586	0.0314277	3	3	0.895894	EhG18281,EhG6509	gmst	complete	HEAT_2|PF13646.6|1.5e-10,PC_rep|PF01851.22|1.4e-06,RPN2_C|PF18004.1|3e-14,PC_rep|PF01851.22|0.00037,PC_rep|PF01851.22|0.0003,RPN2_C|PF18004.1|2.9e-19,PC_rep|PF01851.22|0.00028	regulation of protein catabolic process	405949	none	other localisation	OG0001252	Archaeplastida	NA
EhG26894.3	NA	NA	-0.190444	0.045153	3	3	0.876336	EhG26689	gmst	complete	Isochorismatase|PF00857.20|1.7e-39	Isochorismatase family	2.70629e+83	none	signal peptide	OG0000563	Archaeplastida	NA
EhG26898.1	NA	NA	-0.493263	0.00124664	3	3	0.710416	EhG26688	gmst	complete	EFP|PF01132.20|1.1e-18,EFP_N|PF08207.12|3.7e-25,Elong-fact-P_C|PF09285.11|1.4e-22	Elongation factor P, C-terminal	369436	none	signal peptide	OG0001429	Archaeplastida	NA
EhG26907.3	NA	NA	-0.673554	0.000538638	3	3	0.62696	EhG26678	gmst	complete	CRAL_TRIO_2|PF13716.6|4.9e-08,CRAL_TRIO|PF00650.20|2.1e-31	intermembrane phospholipid transfer	407478359887	none	other localisation	OG0000030	Archaeplastida	NA
EhG26966.1	NA	NA	-0.434528	0.00222235	3	3	0.739936	NA	transdec	complete	His_Phos_1|PF00300.22|4.5e-27,EF-hand_1|PF00036.32|4.8e-09,EF-hand_7|PF13499.6|1e-08,EF-hand_8|PF13833.6|7.3e-08,EF-hand_6|PF13405.6|1.7e-06,EF-hand_5|PF13202.6|1.8e-06	regulation of pentose-phosphate shunt		none	signal peptide	OG0000234	Archaeplastida	NA
EhG26984.1	NA	NA	-0.358885	0.00107616	3	3	0.779767	EhG21385,EhG26601,EhG44414	gmst	complete	NA	photosynthesis	2.272e+23	none	mitochondrion	OG0000185	SAR/Hapista	NA
EhG2700.1	NA	NA	-0.403241	0.000625648	3	3	0.756158	EhG30909	gmst	complete	PALP|PF00291.25|5.6e-59	cysteine biosynthetic process from serine	419614270542709	none	mitochondrion	OG0000128	Archaeplastida	NA
EhG27007.3	NA	NA	-0.316546	0.00563484	3	3	0.80299	EhG7829	gmst	complete	Pkinase|PF00069.25|9.6e-24,Pkinase_Tyr|PF07714.17|0.00023	protein serine/threonine kinase activity	219974	none	other localisation	OG0020232	Phaocystales	NA
EhG27040.2	NA	NA	-0.373424	0.00192565	3	3	0.771948	EhG7854	gmst	complete	Cpn60_TCP1|PF00118.24|1.7e-127	unfolded protein binding		none	other localisation	OG0002771	Archaeplastida	NA
EhG2708.1	NA	NA	-0.383036	0.000520685	3	3	0.766822	EhG30917	gmst	complete	Ribosomal_L32e|PF01655.18|9.9e-51	60s ribosomal protein	7.90414e+16	none	other localisation	OG0002343	Archaeplastida	NA
EhG27154.1	NA	NA	-0.244366	0.00236512	3	3	0.844187	EhG9522	getorf	complete	NA	SCF complex assembly		none	other localisation	OG0001403	Archaeplastida	NA
EhG27231.2	NA	NA	-0.458915	0.00492133	3	3	0.727533	EhG9598	getorf	complete	NA	NA		none	signal peptide	OG0009064	Phaocystales	NA
EhG27313.6	NA	NA	-0.459838	0.000364891	3	3	0.727068	EhG29479	gmst	complete	ABC_tran|PF00005.27|9.7e-18,ABC_tran|PF00005.27|2.6e-21	protein kinase regulator activity	8.79559e+44	none	other localisation	OG0000206	Archaeplastida	NA
EhG27350.2	NA	NA	-1.158	0.000877944	3	3	0.448132	EhG29521	gmst	complete	NA	regulation of response to stimulus		none	signal peptide	OG0020667	E_huxleyi	Coccolithophore specific in 1/6 species
EhG27411.1	NA	NA	-1.07895	0.000157244	3	3	0.473373	NA	gmst	complete	Gln-synt_N|PF03951.19|3.1e-13,Gln-synt_C|PF00120.24|1.6e-20	glutamine biosynthetic process	4.33294e+29	none	other localisation	OG0000763	Archaeplastida	NA
EhG27417.1	NA	NA	-0.306392	0.0364954	3	3	0.808662	NA	gmst	complete	NA	NA	2.42481e+23	none	signal peptide	OG0027343	Prymnesiales	NA
EhG27462.71	NA	NA	-0.897759	0.000246555	3	3	0.53672	EhG38608	gmst	complete	Zip|PF02535.22|6.7e-05,Zip|PF02535.22|1.4e-07	ZIP Zinc transporter		none	other localisation	OG0001031	E_huxleyi	Coccolithophore specific in 1/6 species
EhG27482.2	NA	NA	-0.215687	0.0102239	3	3	0.861136	NA	gmst	5primepartial	AAA_19|PF13245.6|4.3e-07,AAA_12|PF13087.6|1.6e-22,AAA_11|PF13086.6|2.6e-24,Aquarius_N|PF16399.5|2.3e-210,AAA_30|PF13604.6|0.00011	Intron-binding protein		none	other localisation	OG0002141	Archaeplastida	NA
EhG27490.2	NA	NA	-0.358127	0.00259959	3	3	0.780177	EhG27491	gmst	complete	NA	NA	2.27285e+23	none	other localisation	OG0054688	E_huxleyi	Coccolithophore specific in 1/6 species
EhG28103.2	NA	NA	-0.267699	0.00536342	3	3	0.830643	EhG11180	gmst	complete	MAPEG|PF01124.18|8.3e-08	MAPEG family		none	other localisation	OG0041051	E_huxleyi	NA
EhG28147.5	NA	NA	-0.278361	0.00314454	3	3	0.824527	EhG11214	gmst	complete	RRM_1|PF00076.22|2.4e-16,RRM_1|PF00076.22|1.1e-19	RNA splicing		none	other localisation	OG0000726	Archaeplastida	NA
EhG28191.2	Aminotransferase class-III	Possible ornithine aminotransferase	-0.797622	4.45389e-05	3	3	0.575297	EhG11256	getorf	complete	NA	N2-acetyl-L-ornithine:2-oxoglutarate 5-aminotransferase activity	2.51666e+134	none	signal peptide	OG0001847	Archaeplastida	NA
EhG28199.1	NA	NA	-0.337988	0.000649678	3	3	0.791144	EhG11262	getorf	complete	NA	diaminopimelate epimerase activity		none	signal peptide	OG0003797	Archaeplastida	NA
EhG28205.1	NA	NA	-0.37474	0.00686585	3	3	0.771244	EhG11269	gmst	complete	CMAS|PF02353.20|1.5e-05,Methyltransf_25|PF13649.6|2.4e-10,Methyltransf_31|PF13847.6|3e-06,MTS|PF05175.14|4.4e-06,PrmA|PF06325.13|1.9e-07,Methyltransf_23|PF13489.6|0.00027,Methyltransf_11|PF08241.12|2.9e-06	protein-arginine omega-N asymmetric methyltransferase activity	87910	none	other localisation	OG0006321	Archaeplastida	NA
EhG28209.1	NA	NA	-0.521066	0.000177188	3	3	0.696857	EhG11272	getorf	complete	NA	transferase activity, transferring glycosyl groups		none	other localisation	OG0000601	Archaeplastida	NA
EhG28295.1	NA	NA	-0.292889	0.0324879	2	2	0.816266	EhG5460	transdec	complete	NA	NA		none	signal peptide	OG0040702	E_huxleyi	Coccolithophore specific in 1/6 species
EhG28410.1	NA	NA	-0.127914	0.0302253	3	3	0.915153	EhG12289	gmst	5primepartial	NA	NA		none	other localisation	OG0005914	Archaeplastida	NA
EhG28425.4	NA	NA	-0.237262	0.00704752	3	3	0.848354	EhG12308	getorf	complete	NA	regulation of protein catabolic process	123742	none	other localisation	OG0002687	Archaeplastida	NA
EhG28487.1	NA	NA	-0.357858	0.00223573	3	3	0.780322	NA	gmst	complete	LCAT|PF02450.15|3.7e-25	O-acyltransferase activity	222113312739	none	signal peptide	OG0010082	Haptophyta	NA
EhG28531.2	NA	NA	-0.547988	0.00386919	2	2	0.683973	EhG41660	gmst	complete	ThiF|PF00899.21|6.5e-20	SUMO activating enzyme activity		none	other localisation	OG0002354	Archaeplastida	NA
EhG28542.1	NA	NA	-0.225015	0.0113231	3	3	0.855586	EhG29437	gmst	complete	Acyl-CoA_dh_M|PF02770.19|2.5e-17,Acyl-CoA_dh_1|PF00441.24|1.2e-32,Acyl-CoA_dh_N|PF02771.16|2.5e-09,Acyl-CoA_dh_2|PF08028.11|2.2e-12,EcKinase|PF02958.20|6.6e-06,APH|PF01636.23|6.2e-39	very-long-chain-acyl-CoA dehydrogenase activity	2.59708e+122	none	mitochondrion	OG0000954	Archaeplastida	NA
EhG28634.1	NA	NA	-0.284046	0.00556173	3	3	0.821285	EhG7769	getorf	complete	NA	proteasome-activating ATPase activity	2.80435e+17	none	other localisation	OG0001999	Archaeplastida	NA
EhG2867.8	NA	NA	-0.636484	0.000288172	3	3	0.643279	EhG40709	gmst	complete	ATP-synt_D|PF01813.17|1.2e-63	ATPase activity, coupled to transmembrane movement of substances		none	other localisation	OG0002623	Archaeplastida	NA
EhG28681.1	NA	NA	-0.513629	0.000374093	3	3	0.700458	EhG26997,EhG7790	gmst	complete	PBP_like_2|PF12849.7|4e-43	PBP superfamily domain		none	other localisation	OG0001446	Archaeplastida	NA
EhG28688.11	NA	NA	-0.312651	0.00124664	3	3	0.805161	EhG42982	gmst	complete	Acyl_transf_1|PF00698.21|3.9e-15	[acyl-carrier-protein] S-malonyltransferase activity	4.47765e+40	Description:possibly mitochondrial MCAT but only protein fragment; missing N- and C-term pieces; possible mis-assembly?? Weak proteomics support:Gordon Wolfe:2011-05-08 Defline:putative [acyl-carrier-protein] S-malonyltransferase:Mark van der Giezen:2009-09-10	other localisation	OG0000543	Archaeplastida	NA
EhG28704.2	NA	NA	-0.202266	0.021633	3	3	0.869184	EhG7057	gmst	complete	Ribosomal_L5_C|PF00673.21|1.1e-21,Ribosomal_L5|PF00281.19|7.2e-18	rRNA binding	2.84559e+29	none	other localisation	OG0001886	Archaeplastida	NA
EhG28713.2	NA	NA	-0.395125	0.0111176	3	3	0.760423	EhG7061	gmst	complete	NA	NA	225116109630	none	chloroplast	OG0005735	Archaeplastida	NA
EhG2874.1	NA	NA	-0.175834	0.0237335	3	3	0.885255	EhG40720	gmst	complete	GSHPx|PF00255.19|5.9e-17	glutathione peroxidase activity		none	other localisation	OG0008275	SAR/Hapista	NA
EhG28756.1	NA	NA	-0.128449	0.0278212	3	3	0.914814	EhG7104	transdec	internal	PK|PF00224.21|1.3e-153,PK|PF00224.21|8e-154,PK_C|PF02887.16|1.8e-24,PK_C|PF02887.16|1.9e-09	pyruvate kinase activity		none	other localisation	OG0000192	Archaeplastida	NA
EhG28765.1	NA	NA	-0.266472	0.00638627	3	3	0.83135	EhG7113	getorf	complete	NA	FAD binding	271423	none	other localisation	OG0000549	Archaeplastida	NA
EhG28775.1	NA	NA	-1.27753	0.000374093	3	3	0.412502	EhG7124	gmst	complete	NA	NA	2.25029e+29	none	chloroplast	OG0006726	E_huxleyi	NA
EhG28877.1	NA	NA	-0.151913	0.0438192	3	3	0.900056	EhG40052	gmst	complete	AAA_2|PF07724.14|2.6e-06,AAA_lid_3|PF17862.1|3e-07,DUF815|PF05673.13|0.00016,AAA|PF00004.29|2.8e-43,Prot_ATP_ID_OB|PF16450.5|5.6e-10,RuvB_N|PF05496.12|0.0005,AAA_5|PF07728.14|3.6e-08,AAA_16|PF13191.6|8.6e-05	Belongs to the AAA ATPase family		none	other localisation	OG0000623	Archaeplastida	NA
EhG2901.3	NA	NA	-0.731279	9.94349e-05	3	3	0.60237	EhG24389	getorf	complete	NA	NA		none	other localisation	OG0001773	Phaocystales	NA
EhG29026.6	NA	NA	-0.191449	0.0165425	3	3	0.875726	EhG5520	gmst	complete	tRNA-synt_2b|PF00587.25|6.4e-08,HGTP_anticodon|PF03129.20|3.4e-17,Dpy-30|PF05186.13|0.00034	glycyl-tRNA aminoacylation		none	other localisation	OG0001690	Archaeplastida	NA
EhG29041.1	NA	NA	-0.349643	0.00895378	3	3	0.784778	EhG5540	gmst	complete	DnaJ|PF00226.31|1.7e-08	DnaJ molecular chaperone homology domain		none	signal peptide	OG0007492	Archaeplastida	NA
EhG29080.1	NA	NA	-0.156059	0.0219522	3	3	0.897473	EhG5583	gmst	complete	PCMT|PF01135.19|0.00069,Methyltransf_25|PF13649.6|7.4e-23,PrmA|PF06325.13|0.00038,Methyltransf_12|PF08242.12|1.9e-13,Methyltransf_11|PF08241.12|9.5e-25,Ubie_methyltran|PF01209.18|2e-20,Methyltransf_31|PF13847.6|6.9e-20,MTS|PF05175.14|2.4e-05,Methyltransf_23|PF13489.6|4.1e-15	ubiE/COQ5 methyltransferase family		none	other localisation	OG0008449	SAR/Hapista	NA
EhG29086.1	NA	NA	-0.351173	0.00157358	3	3	0.783946	EhG5590	gmst	complete	NA	NA		none	signal peptide	OG0004611	Archaeplastida	NA
EhG29100.1	NA	NA	-0.405588	0.00189861	3	3	0.754929	EhG5607	gmst	complete	NA	protein conserved in bacteria		none	mitochondrion	OG0027128	Gephyrocapsa	Coccolithophore specific in 2/6 species
EhG29347.1	NA	NA	-0.308092	0.0176111	3	3	0.807709	NA	transdec	5prime_partial	HMG_box|PF00505.19|6.1e-14,HMG_box_2|PF09011.10|2.4e-09	NA		none	other localisation	OG0000135	Archaeplastida	NA
EhG29412.1	NA	NA	-0.339587	0.0117579	3	3	0.790268	NA	gmst	complete	SPRY|PF00622.28|1.8e-07,4F5|PF04419.14|9.4e-07	RNA localization to chromatin		none	other localisation	OG0003745	Archaeplastida	NA
EhG29424.3	NA	NA	-0.374205	0.0178717	2	2	0.77153	EhG28556	gmst	complete	NA	NA		none	other localisation	OG0000157	Archaeplastida	NA
EhG2944.1	NA	NA	-0.185249	0.00919381	3	3	0.879497	EhG24343	gmst	complete	Peptidase_M3|PF01432.20|3.6e-110	metalloendopeptidase activity		none	mitochondrion	OG0000393	Archaeplastida	NA
EhG29492.2	NA	NA	-0.3943	0.00505966	3	3	0.760858	EhG27329	gmst	complete	NA	NA		none	other localisation	OG0001585	Archaeplastida	NA
EhG29528.1	NA	NA	-1.34972	0.00237541	3	3	0.392368	EhG27359,EhG29529,EhG43082	gmst	complete	NA	NA		none	other localisation	OG0013504	E_huxleyi	Coccolithophore specific in 1/6 species
EhG29682.1	NA	NA	-0.309077	0.010029	3	3	0.807158	EhG1527	gmst	complete	B56|PF01603.20|1.4e-188	protein phosphatase regulator activity	4.03869e+23	none	other localisation	OG0001023	Archaeplastida	NA
EhG29715.1	NA	NA	-0.266885	0.00289913	3	3	0.831112	EhG1558	gmst	complete	MreB_Mbl|PF06723.13|2.4e-10,HSP70|PF00012.20|4.2e-139	ATP binding		none	other localisation	OG0000686	Archaeplastida	NA
EhG29721.1	NA	NA	-0.668365	0.000712497	3	3	0.629219	EhG1564	gmst	complete	Myosin_head|PF00063.21|3.1e-194,PDZ|PF00595.24|8.3e-06,PDZ_6|PF17820.1|4e-07	translation initiation factor activity		none	other localisation	OG0000004	Archaeplastida	NA
EhG29888.1	NA	NA	-0.169069	0.0371828	3	3	0.889416	EhG45	gmst	complete	Aldolase|PF01081.19|2.8e-29	KDPG and KHG aldolase		none	mitochondrion	OG0002843	Archaeplastida	NA
EhG30115.1	NA	NA	-0.343571	0.00840013	3	3	0.788088	NA	gmst	complete	CRAL_TRIO|PF00650.20|4e-05	NA	364340	none	other localisation	OG0006401	Haptophyta	NA
EhG30206.1	NA	NA	-0.714495	0.000121687	3	3	0.609418	EhG5974	gmst	complete	NA	NA		none	mitochondrion	OG0023763	Phaocystales	NA
EhG30262.4	NA	NA	-0.239358	0.0311568	3	3	0.847122	EhG6019	gmst	complete	STPPase_N|PF16891.5|0.00096,Metallophos|PF00149.28|1e-37	Serine threonine-protein phosphatase	8.73189e+68	none	other localisation	OG0000038	Archaeplastida	NA
EhG30295.1	NA	NA	-0.427581	0.00274595	3	3	0.743508	EhG29739,EhG29740,EhG30296,EhG39132	gmst	complete	ATP-synt_C|PF00137.21|3.7e-13,ATP-synt_C|PF00137.21|2.8e-19	ATP hydrolysis coupled proton transport	2.82607e+17	Name:ATPVc/c'5:Mary E. Marsh:2009-02-08 Description:H+-transporting ATPase; Vacuolar H+-ATPase	signal peptide	OG0000320	Archaeplastida	NA
EhG30412.1	NA	NA	-0.222793	0.0351699	2	2	0.856905	EhG25624	gmst	complete	DUF3493|PF11998.8|3.7e-13	NA	201257	none	signal peptide	OG0010528	Haptophyta	NA
EhG30426.1	NA	NA	-0.391404	0.0106049	2	2	0.762387	EhG25613	gmst	complete	Ammonium_transp|PF00909.21|4.4e-70	ammonium transmembrane transporter activity		none	other localisation	NA	E_huxleyi	No Orthogroup
EhG30518.58	NA	NA	-0.218801	0.0052942	3	3	0.859279	EhG18636,EhG44510	gmst	complete	JAB|PF01398.21|8.5e-09,U5_2-snRNA_bdg|PF10597.9|4.9e-72,PROCT|PF08084.11|5.1e-52,PROCN|PF08083.11|7.9e-224,RRM_4|PF10598.9|2.2e-45,PRO8NT|PF08082.11|1.6e-87,U6-snRNA_bdg|PF10596.9|7.1e-89,PRP8_domainIV|PF12134.8|7.1e-128	U5 snRNA binding		none	other localisation	OG0000381	Archaeplastida	NA
EhG30545.1	NA	NA	-0.262806	0.040487	2	2	0.833465	EhG18662	gmst	complete	EF-hand_8|PF13833.6|1.5e-07,EF-hand_7|PF13499.6|1.6e-07,EF-hand_7|PF13499.6|2.9e-08	NA	8.73589e+32	none	signal anchor	OG0003084	Archaeplastida	NA
EhG30580.1	NA	NA	-0.241549	0.0130455	3	3	0.845837	EhG18700	gmst	complete	NDK|PF00334.19|7.4e-40	Nucleoside diphosphate kinase	2.0671e+41	none	signal peptide	OG0000508	Archaeplastida	NA
EhG30602.1	NA	NA	-1.33313	0.000180548	3	3	0.396907	EhG38632	gmst	complete	cobW|PF02492.19|8e-42,CobW_C|PF07683.14|2.5e-22	ATP binding	1.14618e+17	none	signal peptide	OG0000029	Archaeplastida	NA
EhG30665.34	NA	NA	-0.18594	0.018791	3	3	0.879076	EhG16682	gmst	complete	Chloroa_b-bind|PF00504.21|1.8e-28	Chlorophyll A-B binding protein		none	signal peptide	OG0000018	Archaeplastida	NA
EhG30769.11	NA	NA	-0.195786	0.00860229	3	3	0.873097	EhG21067	gmst	complete	Cys_Met_Meta_PP|PF01053.20|1.4e-37,Cys_Met_Meta_PP|PF01053.20|9.5e-79	cystathionine gamma-synthase activity	351631	none	mitochondrion	OG0000261	Archaeplastida	NA
EhG30787.5	NA	NA	-0.38067	0.00161831	3	3	0.768081	NA	getorf	complete	NA	Chlorophyll A-B binding protein	2.84983e+63	none	mitochondrion	OG0007044	Phaocystales	NA
EhG30955.8	NA	NA	-0.466493	0.000360573	3	3	0.723722	EhG2748,EhG2782,EhG43739	gmst	complete	Ribosomal_S27e|PF01667.17|2.6e-27	ribosomal small subunit assembly	6.00356e+140	none	other localisation	OG0002063	Archaeplastida	NA
EhG30968.109	NA	NA	-0.474433	0.000585998	3	3	0.71975	EhG2759	gmst	complete	DUF3479|PF11965.8|1.1e-48,CobN-Mg_chel|PF02514.16|0	ligase activity, forming nitrogen-metal bonds	2.7665e+107	none	other localisation	OG0000514	Archaeplastida	NA
EhG31003.5	NA	NA	-0.394416	0.00442311	3	3	0.760797	EhG2797	gmst	5primepartial	Ribosomal_L29|PF00831.23|2.8e-10	Belongs to the universal ribosomal protein uL29 family		none	signal peptide	OG0009457	Phaocystales	NA
EhG31063.3	NA	NA	-0.246927	0.0150233	3	3	0.842689	EhG38416	gmst	complete	HMGL-like|PF00682.19|9.8e-91,LeuA_dimer|PF08502.10|5.3e-16,LeuA_dimer|PF08502.10|0.00031	Belongs to the alpha-IPM synthase homocitrate synthase family	277636	none	mitochondrion	OG0001202	Archaeplastida	NA
EhG31085.3	NA	NA	-0.216511	0.00831131	3	3	0.860644	EhG24783,EhG31086	getorf	complete	NA	NA		none	other localisation	OG0011049	Calcihaptophyta	Coccolithophore specific in 5/6 species
EhG31109.3	NA	NA	-0.30481	0.00546748	3	3	0.809549	EhG3295	gmst	complete	LCIB_C_CA|PF18599.1|2.6e-62	NA		none	other localisation	OG0001053	Archaeplastida	NA
EhG31148.1	NA	NA	-0.260461	0.0168856	3	3	0.834821	EhG3332	gmst	complete	NA	NA		none	other localisation	OG0082905	Gephyrocapsa	Coccolithophore specific in 2/6 species
EhG31209.8	NA	NA	-0.153375	0.0394246	3	3	0.899144	EhG3241	gmst	complete	COPIIcoated_ERV|PF07970.12|2.3e-21,ERGIC_N|PF13850.6|6.2e-14,Thioredoxin|PF00085.20|4e-17	vesicle-mediated transport		none	other localisation	OG0003752	SAR/Hapista	NA
EhG31238.1	NA	NA	-0.223253	0.00797667	3	3	0.856632	EhG3217	gmst	complete	NA	NA		none	other localisation	OG0018664	Gephyrocapsa	Coccolithophore specific in 2/6 species
EhG31413.9	NA	NA	-1.41905	6.51337e-05	3	3	0.373957	EhG37855	gmst	complete	LRR_8|PF13855.6|2.2e-05,LRR_8|PF13855.6|4.2e-05	NA		none	signal peptide	OG0007977	Gephyrocapsa	Coccolithophore specific in 2/6 species
EhG31430.1	Ribosomal protein L7Ae/L30e/S12e/Gadd45 family		-0.434066	0.00148761	3	3	0.740173	EhG25064	gmst	complete	Ribosomal_L7Ae|PF01248.26|3.8e-20	maturation of LSU-rRNA	2.57435e+98	none	other localisation	OG0001170	Archaeplastida	NA
EhG31506.3	NA	NA	-0.189205	0.00881141	3	3	0.877089	EhG7628	gmst	complete	PALP|PF00291.25|1.1e-61	cysteine biosynthetic process from serine	279225269583	none	other localisation	OG0000128	Archaeplastida	NA
EhG31722.3	NA	NA	-0.271935	0.00283987	3	3	0.828208	EhG10420,EhG38029	gmst	complete	PGM_PMM_IV|PF00408.20|7.8e-07,PGM_PMM_III|PF02880.16|4.1e-19,PGM_PMM_II|PF02879.16|1.7e-09,PGM_PMM_I|PF02878.16|1.2e-27	phosphoglucomutase activity		none	other localisation	OG0001110	Archaeplastida	NA
EhG31847.1	NA	NA	-0.461865	0.00105817	3	3	0.726047	EhG14094	gmst	complete	3Beta_HSD|PF01073.19|2.9e-05,Epimerase|PF01370.21|1.5e-41,RmlD_sub_bind|PF04321.17|1.2e-06,GDP_Man_Dehyd|PF16363.5|1.4e-50	racemase and epimerase activity, acting on carbohydrates and derivatives		none	signal peptide	OG0001907	Archaeplastida	NA
EhG31887.1	NA	NA	-0.339343	0.00423199	3	3	0.790401	EhG14133	gmst	5primepartial	ALAD|PF00490.21|9.8e-114,ALAD|PF00490.21|4.9e-05	porphobilinogen synthase activity		none	mitochondrion	OG0002780	Archaeplastida	NA
EhG31923.6	NA	NA	-0.947849	0.000584557	3	3	0.518405	EhG14172	gmst	complete	HCO3_cotransp|PF00955.21|8e-18,HCO3_cotransp|PF00955.21|1.1e-63,HCO3_cotransp|PF00955.21|1.1e-71	HCO3- transporter family		none	other localisation	OG0000138	Archaeplastida	NA
EhG31967.2	NA	NA	-0.239676	0.0220195	2	2	0.846935	EhG1112	gmst	complete	NA	NA		none	mitochondrion	OG0006853	Archaeplastida	NA
EhG31971.2	NA	NA	-0.238338	0.0201349	3	3	0.847721	EhG1115	gmst	complete	DcpS_C|PF11969.8|4.2e-23,HIT|PF01230.23|5.4e-30	nucleoside phosphate binding	2.78477e+41	none	mitochondrion	OG0000797	Archaeplastida	NA
EhG32151.2	NA	NA	-0.309437	0.00150544	3	3	0.806957	EhG37426	gmst	complete	NA	NA	283753	none	signal peptide	OG0001684	Archaeplastida	NA
EhG3217.1	NA	NA	-0.448504	0.000462204	3	3	0.732802	EhG31238	gmst	complete	NA	NA	2.78269e+53	none	other localisation	OG0018664	Gephyrocapsa	Coccolithophore specific in 2/6 species
EhG32434.1	NA	NA	-0.622972	0.00816169	2	2	0.649332	EhG33386	gmst	complete	NA	NA		none	other localisation	OG0017133	Gephyrocapsa	Coccolithophore specific in 2/6 species
EhG32552.1	NA	NA	-0.216829	0.0108363	3	3	0.860455	EhG32553,EhG42568	gmst	complete	RPN7|PF10602.9|3.9e-51,PCI|PF01399.27|3.6e-08	proteasome-mediated ubiquitin-dependent protein catabolic process		none	other localisation	OG0002453	Archaeplastida	NA
EhG32591.1	NA	NA	-0.316529	0.0105823	3	3	0.802999	EhG25177	gmst	complete	Ribosomal_S15|PF00312.22|2.8e-27	structural constituent of ribosome	229089,234953,257614,49250,49454,49487,59867,60012,60015,71517,71522,71545,73097,73113,73117,282170,283249,89292,89293,89294,89734,89735,89736,263999,264000,264001,264447,264448,264449,272041,409525,409526,410788,410789,399916,400362,111505,363698,363699,366238,366239,313903,314869	none	signal peptide	OG0001007	Archaeplastida	NA
EhG32688.1	NA	NA	-0.311059	0.00621329	3	3	0.80605	EhG6657	gmst	complete	EF-hand_8|PF13833.6|1.3e-05,EF-hand_7|PF13499.6|1.4e-06	NA		none	mitochondrion	OG0002979	Archaeplastida	NA
EhG32708.1	NA	NA	-0.394087	0.000494818	3	3	0.760971	EhG6678	gmst	complete	Ribosomal_L1|PF00687.21|1.3e-42	maturation of LSU-rRNA	2658567901179430	none	other localisation	OG0001749	Archaeplastida	NA
EhG3282.1	NA	NA	-0.399584	0.00417985	3	3	0.758077	EhG31160	gmst	complete	EF-hand_5|PF13202.6|1.1e-05,EF-hand_8|PF13833.6|5.3e-05,EF-hand_1|PF00036.32|0.00023,EF-hand_8|PF13833.6|1.9e-07,EF-hand_1|PF00036.32|1.1e-08,EF-hand_7|PF13499.6|9.4e-06,EF-hand_6|PF13405.6|3e-09,EF-hand_9|PF14658.6|2.2e-05,EF-hand_7|PF13499.6|1.1e-13	Ca2 -binding protein (EF-Hand superfamily	2.78289e+33	none	other localisation	OG0000008	Archaeplastida	NA
EhG32843.1	NA	NA	-0.461943	0.00142429	3	3	0.726008	EhG25277	gmst	complete	PfkB|PF00294.24|1.1e-23,PfkB|PF00294.24|8e-10	carbohydrate kinase activity	2.79843e+41	none	other localisation	OG0004787	Archaeplastida	NA
EhG3291.12	NA	NA	-0.192834	0.0166898	3	3	0.874885	EhG31105	gmst	complete	CDCA|PF18484.1|7.6e-13,CA_like|PF10563.9|2.6e-50	Cadmium carbonic anhydrase repeat		none	other localisation	OG0001141	Archaeplastida	NA
EhG32929.1	NA	NA	-0.143162	0.0350181	3	3	0.905533	EhG17061	gmst	5primepartial	GTP_EFTU_D3|PF03143.17|1.7e-28,GTP_EFTU_D2|PF03144.25|9.4e-08,GTP_EFTU|PF00009.27|2.2e-44	regulation of response to stimulus	2.633e+41	none	other localisation	OG0000081	Archaeplastida	NA
EhG32949.5	NA	NA	-0.150346	0.0213768	3	3	0.901034	EhG17080	gmst	5primepartial	AAA_5|PF07728.14|0.00098,AAA|PF00004.29|1.3e-39,AAA_2|PF07724.14|0.0004,AAA_lid_3|PF17862.1|1.5e-11	Belongs to the AAA ATPase family		none	other localisation	OG0002055	Archaeplastida	NA
EhG33160.2	NA	NA	-1.14756	0.00300039	3	3	0.451389	NA	gmst	complete	Ribosomal_S21e|PF01249.18|5e-05,Ribosomal_S21e|PF01249.18|6e-19	endonucleolytic cleavage to generate mature 3'-end of SSU-rRNA from (SSU-rRNA, 5.8S rRNA, LSU-rRNA)		none	other localisation	OG0003519	Archaeplastida	NA
EhG33277.2	NA	NA	-0.222915	0.0119394	3	3	0.856832	EhG19364	gmst	complete	NA	NA	2.71771e+77	none	signal peptide	OG0005331	Archaeplastida	NA
EhG33297.61	NA	NA	-0.227941	0.01966	3	3	0.853853	EhG19382,EhG19385	gmst	complete	Carboxyl_trans|PF01039.22|5.5e-17,Biotin_carb_N|PF00289.22|3.1e-22,ACC_central|PF08326.12|7.8e-78	acetyl-CoA carboxylase		none	other localisation	NA	E_huxleyi	No Orthogroup
EhG33386.2	NA	NA	-0.238794	0.0284594	3	3	0.847453	EhG32434	gmst	complete	NA	NA	3.6834e+17	none	other localisation	OG0017133	Gephyrocapsa	Coccolithophore specific in 2/6 species
EhG33470.1	NA	NA	-0.44373	0.00778245	3	3	0.735231	EhG31821	gmst	complete	WD40|PF00400.32|2.5e-06,WD40|PF00400.32|1.5e-05	mRNA splicing, via spliceosome	4.04537e+17	none	other localisation	OG0002374	Archaeplastida	NA
EhG33501.4	NA	NA	-0.236887	0.0464198	3	3	0.848574	EhG27722	gmst	complete	TRAP_alpha|PF03896.16|4.8e-08	cotranslational protein targeting to membrane	409191363098	none	signal peptide	OG0003083	Archaeplastida	NA
EhG33505.2	NA	NA	-0.347852	0.00595515	3	3	0.785753	EhG27726	gmst	complete	Chloroa_b-bind|PF00504.21|6.9e-33	Chlorophyll A-B binding protein		none	chloroplast	NA	E_huxleyi	No Orthogroup
EhG33749.3	NA	NA	-0.370293	0.0185452	3	3	0.773625	EhG43807	getorf	complete	NA	structural constituent of ribosome	4817475611	none	other localisation	OG0001729	Archaeplastida	NA
EhG33790.1	NA	NA	-0.201369	0.0242371	3	3	0.869725	NA	gmst	complete	NA	NA	2.17688e+23	none	signal peptide	OG0011731	Calcihaptophyta	NA
EhG33833.11	NA	NA	-0.49613	0.00130704	3	3	0.709006	EhG43707	gmst	complete	Chloroa_b-bind|PF00504.21|3.1e-29	Chlorophyll A-B binding protein		none	signal peptide	OG0001538	SAR/Hapista	NA
EhG33899.2	NA	NA	-0.137173	0.0345146	3	3	0.909299	EhG39824,EhG44168	gmst	complete	CMD|PF02627.20|1.8e-06	NA		none	other localisation	OG0007943	Archaeplastida	NA
EhG33922.1	NA	NA	-0.521836	0.00016465	3	3	0.696485	EhG844	getorf	complete	NA	UFM1 activating enzyme activity		none	other localisation	OG0001655	Archaeplastida	NA
EhG33938.2	NA	NA	-0.285078	0.0209501	3	3	0.820697	EhG860	gmst	complete	VID27|PF08553.10|2.9e-12	VID27 cytoplasmic protein	353410	none	other localisation	OG0006209	Archaeplastida	NA
EhG34077.2	NA	NA	-0.199492	0.0334552	2	2	0.870857	EhG17943	gmst	complete	KH_dom-like|PF14714.6|7.8e-31,GTP_EFTU|PF00009.27|7.6e-10	GTP binding		none	other localisation	OG0001071	Archaeplastida	NA
EhG3417.7	NA	NA	-0.651807	0.000573053	3	3	0.636482	EhG24970	gmst	complete	cobW|PF02492.19|7.1e-58,CobW_C|PF07683.14|8.3e-21	ATP binding		none	other localisation	OG0000029	Archaeplastida	NA
EhG34276.2	NA	NA	-0.222261	0.0240987	3	3	0.857221	EhG311	gmst	complete	Rubredoxin|PF00301.20|0.00011	NA		none	signal peptide	OG0004499	Archaeplastida	NA
EhG34369.6	NA	NA	-0.408933	0.00109854	3	3	0.75318	EhG31334	transdec	complete	Lipase_3|PF01764.25|4.8e-20	coniferyl-alcohol dehydrogenase activity		none	other localisation	OG0018668	E_huxleyi	Coccolithophore specific in 1/6 species
EhG3438.1	NA	NA	-0.179309	0.0145049	3	3	0.883126	EhG24953,EhG44393	transdec	5prime_partial	S10_plectin|PF03501.15|0.00023,S10_plectin|PF03501.15|3e-28	ribosomal small subunit assembly		none	other localisation	OG0000709	Archaeplastida	NA
EhG34408.2	NA	NA	-0.640592	0.00314454	2	2	0.64145	EhG34885	gmst	complete	HCO3_cotransp|PF00955.21|4e-69,HCO3_cotransp|PF00955.21|1.1e-61	inorganic anion exchanger activity		none	other localisation	OG0000138	Archaeplastida	NA
EhG34449.1	NA	NA	-0.216508	0.027888	3	3	0.860646	EhG34927	gmst	complete	MMR_HSR1|PF01926.23|3.4e-06,G-alpha|PF00503.20|2.4e-08,SRPRB|PF09439.10|7.3e-13,Roc|PF08477.13|3.2e-13,Ras|PF00071.22|3.9e-12,Arf|PF00025.21|2.8e-66,Gtr1_RagA|PF04670.12|5.7e-08	GTP binding	2.83549e+39	none	signal peptide	OG0000041	Archaeplastida	NA
EhG34601.5	NA	NA	-0.197847	0.0143243	3	3	0.871851	EhG36748	getorf	complete	NA	phosphopantetheine binding		none	other localisation	OG0000053	Archaeplastida	NA
EhG34849.2	NA	NA	-0.209872	0.00757449	3	3	0.864614	EhG32519	gmst	complete	PfkB|PF00294.24|2.5e-73	adenosine kinase activity	403510352500	none	other localisation	OG0001154	Archaeplastida	NA
EhG34968.2	NA	NA	-0.298557	0.00547116	3	3	0.813065	EhG13118,EhG13119	getorf	complete	NA	structural constituent of ribosome		none	other localisation	OG0001240	Archaeplastida	NA
EhG35020.1	NA	NA	-0.357865	0.010987	2	2	0.780318	EhG23262	gmst	complete	MMR_HSR1|PF01926.23|2.9e-18,TGS|PF02824.21|5.5e-17,MMR_HSR1_Xtn|PF16897.5|5.3e-39,FeoB_N|PF02421.18|1.7e-06	GTP binding		none	other localisation	OG0000660	Archaeplastida	NA
EhG35078.2	NA	NA	-0.409895	0.000699798	3	3	0.752678	EhG43541,EhG44633	gmst	complete	ABC1|PF03109.16|1.7e-31	regulation of tocopherol cyclase activity		none	mitochondrion	OG0000059	Archaeplastida	NA
EhG35192.5	NA	NA	-0.39832	0.000884956	3	3	0.758741	EhG34778	gmst	complete	Chloroa_b-bind|PF00504.21|2.5e-33	Chlorophyll A-B binding protein	2.82494e+58	none	mitochondrion	OG0000032	SAR/Hapista	NA
EhG35270.7	NA	NA	-0.191967	0.015474	3	3	0.875412	EhG7410	gmst	complete	EMP70|PF02990.16|9.2e-195	positive regulation of protein exit from endoplasmic reticulum		none	signal peptide	OG0000079	Archaeplastida	NA
EhG35376.1	NA	NA	-0.146516	0.0367793	3	3	0.90343	EhG1037	gmst	complete	Mito_carr|PF00153.27|1.3e-11,Mito_carr|PF00153.27|1.5e-05,Mito_carr|PF00153.27|1.2e-17	S-adenosyl-L-methionine transmembrane transport		none	signal peptide	OG0000168	Archaeplastida	NA
EhG35402.4	NA	NA	-0.206972	0.0482546	3	3	0.866354	EhG1057	gmst	complete	FAD_binding_2|PF00890.24|8.7e-05,ELFV_dehydrog|PF00208.21|3.1e-08,NAD_binding_8|PF13450.6|7.6e-08,DAO|PF01266.24|9.6e-46,Mqo|PF06039.15|0.00053,ELFV_dehydrog_N|PF02812.18|2.2e-05,Thi4|PF01946.17|7.6e-07	Glu/Leu/Phe/Val dehydrogenase, dimerisation domain	543575437354410	none	mitochondrion	OG0007241	Archaeplastida	NA
EhG35474.1	NA	NA	-0.331381	0.00141327	3	3	0.794775	EhG12823,EhG12824,EhG35476	gmst	complete	AdoHcyase_NAD|PF00670.21|4.7e-81,AdoHcyase|PF05221.17|1.8e-137,IlvN|PF07991.12|7.9e-05,2-Hacid_dh_C|PF02826.19|8.3e-08	adenosylhomocysteinase activity	224588,42883,52503,52504,52506,52531,52544,60091,60093,70213,70216,70217,70229,70234,70239,70259,71363,281319,281320,88956,88957,88958,88959,88960,88961,263660,263661,263662,263663,263664,263665,265843,265844,265845,271331,408430,408431,408432,408433,408434,408435,399526,399527,79403,79404,79405,79406,109377,361722,361723,361724,361734,361735,361736,313124,313126	none	other localisation	OG0000846	Archaeplastida	NA
EhG35617.1	NA	NA	-0.220392	0.0402975	2	2	0.858332	EhG10111	gmst	complete	4HBT|PF03061.22|1.8e-10,4HBT|PF03061.22|1.6e-14,4HBT_3|PF13622.6|5.2e-05	acyl-CoA hydrolase activity		none	signal peptide	OG0015559	Calcihaptophyta	NA
EhG35628.2	NA	NA	-0.212443	0.0185557	3	3	0.863075	EhG10118	gmst	complete	TIM|PF00121.18|1.9e-65	triosephosphate isomerase	46907	none	other localisation	OG0000472	Archaeplastida	NA
EhG35637.1	NA	NA	-0.34708	0.0242371	2	2	0.786174	NA	gmst	complete	NA	NA		none	other localisation	OG0011679	Prymnesiales	NA
EhG35678.2	NA	NA	-0.408737	0.00348027	3	3	0.753283	EhG13070	gmst	complete	NA	NA		none	other localisation	OG0002820	Gephyrocapsa	Coccolithophore specific in 2/6 species
EhG35894.1	NA	NA	-0.515876	0.00195961	3	3	0.699368	EhG35890	gmst	complete	DNA_pol_B_exo1|PF03104.19|1.3e-31,DNA_pol_B_exo1|PF03104.19|7.2e-33,zf-C4pol|PF14260.6|2e-08,DNA_pol_B|PF00136.21|9.9e-142	DNA replication proofreading	282198	none	other localisation	OG0000398	Archaeplastida	NA
EhG35923.1	NA	NA	-1.01653	0.00121303	2	2	0.494305	EhG35865	gmst	complete	Methyltransf_24|PF13578.6|2.9e-06	Methyltransferase domain	2.72055e+28	none	other localisation	OG0013854	SAR/Hapista	NA
EhG35934.1	NA	NA	-0.192822	0.0394246	2	2	0.874892	EhG35855	gmst	complete	NUDIX|PF00293.28|1.4e-10	Transient receptor potential cation channel, subfamily M, member 2		none	other localisation	OG0000219	Archaeplastida	NA
EhG35973.31	NA	NA	-0.257184	0.00378619	3	3	0.836719	EhG10612	gmst	complete	HSP70|PF00012.20|4.2e-104,HSP70|PF00012.20|1e-146,MreB_Mbl|PF06723.13|8.9e-07	ATP binding		none	other localisation	OG0000031	Archaeplastida	NA
EhG36319.2	NA	NA	-0.283308	0.00190863	3	3	0.821705	EhG19139	gmst	complete	NA	NA		none	other localisation	OG0008222	Phaocystales	NA
EhG36559.5	NA	NA	-0.299637	0.00539311	3	3	0.812457	EhG37796	gmst	complete	LRR_6|PF13516.6|1.8e-06,LRR_6|PF13516.6|9.8e-07	interleukin-8 biosynthetic process	2.69032e+17	none	other localisation	OG0004092	Phaocystales	NA
EhG36748.1	NA	NA	-0.316684	0.00390118	3	3	0.802913	EhG34601	gmst	complete	Methyltransf_23|PF13489.6|1.2e-05,Ubie_methyltran|PF01209.18|0.00062,Methyltransf_11|PF08241.12|3e-08,Methyltransf_12|PF08242.12|1.9e-15,Methyltransf_25|PF13649.6|1.2e-09,Ketoacyl-synt_C|PF02801.22|2e-29,KR|PF08659.10|3.9e-48,adh_short_C2|PF13561.6|4.8e-06,ketoacyl-synt|PF00109.26|2.3e-48,adh_short|PF00106.25|2e-06,Methyltransf_31|PF13847.6|2e-05,KR|PF08659.10|1.2e-13,PP-binding|PF00550.25|5.3e-1…	phosphopantetheine binding		none	other localisation	OG0017144	Isochrysidales	NA
EhG36825.3	NA	NA	-0.273959	0.00262615	3	3	0.827047	EhG39152	gmst	complete	Sin3a_C|PF16879.5|2.1e-36,PAH|PF02671.21|9e-16,Sin3_corepress|PF08295.12|1.2e-33,PAH|PF02671.21|4.1e-20	histone deacetylation		none	other localisation	OG0000619	Archaeplastida	NA
EhG36849.1	NA	NA	-0.627546	0.000136427	3	3	0.647277	EhG43145	gmst	complete	V_ATPase_I|PF01496.19|5.1e-229	vacuolar proton-transporting V-type ATPase complex assembly		none	other localisation	OG0000364	Archaeplastida	NA
EhG36863.1	Lecithin:cholesterol acyltransferase		-0.453227	0.000231499	3	3	0.730407	EhG13584	gmst	5primepartial	LCAT|PF02450.15|2.8e-32	O-acyltransferase activity		none	other localisation	OG0001235	Archaeplastida	NA
EhG37064.6	NA	NA	-0.599569	0.00514305	3	3	0.659951	EhG12967	gmst	complete	Epimerase|PF01370.21|1.5e-07,Methyltransf_11|PF08241.12|0.00016,Glyco_tranf_2_4|PF13704.6|1.6e-05,LRR_8|PF13855.6|4.2e-05,Methyltransf_14|PF08484.11|6.5e-20,Methyltransf_23|PF13489.6|1.5e-15,Methyltransf_13|PF08421.11|6.6e-14,Methyltransf_12|PF08242.12|0.00052	Putative zinc binding domain	4.25487e+21	none	signal peptide	OG0007458	SAR/Hapista	NA
EhG37175.1	NA	NA	-0.386229	0.0406487	3	3	0.765127	EhG42296	gmst	complete	UQ_con|PF00179.26|5.7e-49,Prok-E2_B|PF14461.6|2.2e-05	Belongs to the ubiquitin-conjugating enzyme family		none	other localisation	OG0002097	Archaeplastida	NA
EhG37269.7	NA	NA	-0.387239	0.000584557	3	3	0.764592	EhG10592	getorf	complete	NA	oxidoreductase activity, acting on diphenols and related substances as donors	4687457722	none	signal peptide	OG0001133	Archaeplastida	NA
EhG37302.1	NA	NA	-0.280089	0.00264345	3	3	0.82354	EhG10565	getorf	complete	NA	Belongs to the eukaryotic ribosomal protein eL42 family		none	other localisation	OG0055173	E_huxleyi	Coccolithophore specific in 1/6 species
EhG37368.1	NA	NA	-0.67435	0.00580951	3	3	0.626615	EhG26370,EhG26371	gmst	complete	NA	NA		none	signal peptide	OG0055200	E_huxleyi	NA
EhG37443.2	NA	NA	-0.501512	0.00305933	3	3	0.706366	EhG32134	getorf	complete	NA	Belongs to the universal ribosomal protein uL13 family		none	other localisation	OG0001497	Archaeplastida	NA
EhG37462.4	NA	NA	-0.222379	0.00401878	3	3	0.857151	EhG32117	gmst	complete	Ribosomal_L16|PF00252.18|1.4e-35	structural constituent of ribosome		none	other localisation	OG0001793	Archaeplastida	NA
EhG37491.2	NA	NA	-0.264234	0.0193916	3	3	0.83264	EhG24751	getorf	complete	NA	Cys/Met metabolism PLP-dependent enzyme		none	mitochondrion	OG0000261	Archaeplastida	NA
EhG375.4	NA	NA	-0.240753	0.0135734	3	3	0.846303	EhG33007	gmst	complete	Ribosomal_S10|PF00338.22|2.4e-30	structural constituent of ribosome	8.64889e+32	none	other localisation	OG0002001	Archaeplastida	NA
EhG37521.2	NA	NA	-0.25362	0.00575322	3	3	0.838789	EhG19187	gmst	complete	UDPGP|PF01704.18|6e-18	Utp--glucose-1-phosphate uridylyltransferase		none	signal peptide	OG0000367	Archaeplastida	NA
EhG37638.1	NA	NA	-0.270377	0.0148669	3	3	0.829103	EhG28837	gmst	complete	SNF2_N|PF00176.23|3.6e-65,Helicase_C|PF00271.31|7.7e-21,HDA2-3|PF11496.8|0.00017,ResIII|PF04851.15|6.2e-07	helicase activity	8.93529e+21	none	other localisation	OG0000007	Archaeplastida	NA
EhG37651.5	NA	NA	-0.47273	0.000573053	3	3	0.7206	EhG28846	getorf	complete	NA	NA	2.29664e+53	none	signal peptide	OG0001839	Archaeplastida	NA
EhG37694.1	NA	NA	-0.997421	4.30888e-05	3	3	0.500895	EhG5797	gmst	5primepartial	V-ATPase_G|PF03179.15|2.2e-27	proton transmembrane transport		none	other localisation	OG0002883	Archaeplastida	NA
EhG37695.1	NA	NA	-0.207115	0.00944274	3	3	0.866268	EhG5798	gmst	complete	NA	ciliary receptor clustering involved in smoothened signaling pathway		none	other localisation	OG0002513	Archaeplastida	NA
EhG37755.3	NA	NA	-0.283726	0.00535783	3	3	0.821467	EhG36600,EhG36601	gmst	complete	NA	NA		none	other localisation	OG0004561	Haptophyta	NA
EhG37780.19	NA	NA	-0.148871	0.027888	3	3	0.901956	EhG36576	gmst	complete	Chloroa_b-bind|PF00504.21|5e-29	guanyl-nucleotide exchange factor activity		none	other localisation	OG0000018	Archaeplastida	NA
EhG37829.14	NA	NA	-0.194842	0.016738	3	3	0.873669	EhG31396	gmst	complete	Chloroa_b-bind|PF00504.21|1e-35	Chlorophyll A-B binding protein		none	other localisation	OG0000209	SAR/Hapista	NA
EhG37898.3	NA	NA	-0.204625	0.0362207	2	2	0.867764	EhG42258	getorf	complete	NA	NA		none	signal peptide	OG0023061	Calcihaptophyta	Coccolithophore specific in 3/6 species
EhG38006.4	NA	NA	-0.329666	0.0188944	2	2	0.795721	EhG10401	gmst	complete	Glyco_hydro_47|PF01532.20|1.6e-111	mannosyl-oligosaccharide 1,2-alpha-mannosidase activity	2.78386e+17	none	other localisation	OG0000175	Archaeplastida	NA
EhG38060.1	NA	NA	-0.373399	0.0014671	3	3	0.771962	EhG8392	getorf	complete	NA	arsonoacetate metabolic process		none	signal peptide	OG0001179	Archaeplastida	NA
EhG38071.2	NA	NA	-0.270881	0.0424659	3	3	0.828813	EhG8402	transdec	complete	NA	NA	197528	none	other localisation	OG0005793	Phaocystales	NA
EhG38084.1	NA	NA	-0.646388	0.000108951	3	3	0.638878	EhG8413	getorf	complete	NA	NA		none	other localisation	OG0008633	Phaocystales	NA
EhG38112.1	NA	NA	-0.371471	0.00314101	3	3	0.772994	EhG20592	gmst	complete	NA	NA	2.22737e+47	none	signal peptide	OG0040694	E_huxleyi	NA
EhG38205.7	NA	NA	-0.818076	6.96329e-05	3	3	0.567198	EhG38693	gmst	complete	vATP-synt_E|PF01991.18|6.4e-45	Produces ATP from ADP in the presence of a proton gradient across the membrane		none	other localisation	OG0001397	Archaeplastida	NA
EhG38215.10	NA	NA	-0.187391	0.0190216	3	3	0.878192	EhG34866,EhG38687,EhG44284	gmst	complete	S-AdoMet_synt_C|PF02773.16|1.4e-59,S-AdoMet_synt_N|PF00438.20|1.1e-35	methionine adenosyltransferase activity		none	other localisation	NA	E_huxleyi	No Orthogroup
EhG38215.43	NA	NA	-0.197432	0.0185489	3	3	0.872101	EhG34866,EhG38687,EhG44284	gmst	5primepartial	S-AdoMet_synt_C|PF02773.16|1.3e-59,S-AdoMet_synt_M|PF02772.16|6.3e-07	methionine adenosyltransferase activity		none	other localisation	NA	E_huxleyi	No Orthogroup
EhG38359.1	NA	NA	-0.486924	0.0225906	2	2	0.713545	EhG38405	gmst	complete	NA	NA		none	other localisation	OG0007084	Archaeplastida	NA
EhG38474.1	NA	NA	-0.268837	0.00181226	3	3	0.829988	EhG36374	gmst	complete	Ribosomal_L10|PF00466.20|3.6e-12	Ribosomal protein L10	2.73208e+35	none	signal peptide	OG0004212	Archaeplastida	NA
EhG38503.2	NA	NA	-0.375951	0.00202434	3	3	0.770597	EhG36401	getorf	complete	NA	NA		none	other localisation	OG0011054	Calcihaptophyta	Coccolithophore specific in Gephyrocapsa Zygodiscales Coccolithales
EhG38608.15	NA	NA	-1.24774	0.000288172	3	3	0.421108	EhG27462	gmst	complete	Zip|PF02535.22|3.7e-08,Zip|PF02535.22|2e-10	ZIP Zinc transporter		none	other localisation	OG0001031	E_huxleyi	Coccolithophore specific in 1/6 species
EhG38627.3	NA	NA	-0.397381	0.00126168	3	3	0.759235	NA	transdec	complete	Vint|PF14623.6|1.4e-18,VWA_2|PF13519.6|1.7e-12	Hint-domain	4.12956e+23	none	other localisation	OG0001169	Archaeplastida	NA
EhG38722.2	NA	NA	-0.188482	0.0109305	3	3	0.877529	EhG38182	gmst	complete	dTDP_sugar_isom|PF00908.17|8.8e-46,Epimerase|PF01370.21|4.8e-12,RmlD_sub_bind|PF04321.17|2.6e-59	3-beta-hydroxy-delta5-steroid dehydrogenase activity	573915740057773	none	other localisation	OG0004491	Archaeplastida	NA
EhG38866.1	NA	NA	-0.237623	0.0349097	3	3	0.848142	EhG3029	gmst	complete	Histone|PF00125.24|2.4e-16,Histone_H2A_C|PF16211.5|1.8e-19,CBFD_NFYB_HMF|PF00808.23|7.5e-05	Histone H2A	2.10563e+42	none	other localisation	OG0000214	Archaeplastida	NA
EhG38941.8	NA	NA	-0.241159	0.0445627	3	3	0.846065	EhG11791	getorf	complete	NA	translation		none	other localisation	OG0001261	Archaeplastida	NA
EhG38987.3	NA	NA	-0.221016	0.0109305	3	3	0.857961	EhG35336,EhG994	gmst	complete	Pyr_redox_2|PF07992.14|7.8e-18,NAD_binding_9|PF13454.6|7.1e-05,FAD_binding_2|PF00890.24|0.00083,NAD_binding_8|PF13450.6|1.8e-07,Pyr_redox_3|PF13738.6|2.2e-17,Lycopene_cycl|PF05834.12|7.9e-05,FMO-like|PF00743.19|1.1e-35,Thi4|PF01946.17|0.00013,K_oxygenase|PF13434.6|1.3e-07,HI0933_like|PF03486.14|0.00044	N,N-dimethylaniline monooxygenase activity		none	other localisation	OG0000371	Archaeplastida	NA
EhG39130.1	NA	NA	-0.267436	0.0236698	3	3	0.830795	EhG30299,EhG30300	gmst	complete	FKBP_C|PF00254.28|8.8e-11	histone peptidyl-prolyl isomerization	2.3124e+47	none	signal peptide	OG0001521	Archaeplastida	NA
EhG39248.3	NA	NA	-0.339782	0.00256357	3	3	0.790161	EhG19009,EhG24716,EhG25491,EhG37096,EhG9802	gmst	complete	ubiquitin|PF00240.23|7.7e-05,ubiquitin|PF00240.23|7e-06	ubiquitin	4.97985e+47	none	signal peptide	OG0082026	Gephyrocapsa	Coccolithophore specific in 2/6 species
EhG39280.3	NA	NA	-0.495546	0.00116132	3	3	0.709293	EhG24650	gmst	complete	NA	NA		none	signal peptide	OG0004097	Prymnesiales	NA
EhG39307.1	NA	NA	-0.214732	0.00644689	3	3	0.861706	EhG24681,EhG44472	gmst	complete	NA	NA	2.71038e+47	none	other localisation	OG0027586	E_huxleyi	NA
EhG39357.3	NA	NA	-0.561413	0.000214233	3	3	0.677638	EhG15825	gmst	complete	ATP-synt_ab|PF00006.25|6.4e-67,ATP-synt_ab_N|PF02874.23|6.4e-11	ATP hydrolysis coupled proton transport	4.0435e+65	none	other localisation	OG0001065	Archaeplastida	NA
EhG3936.1	NA	NA	-0.944233	4.30888e-05	3	3	0.519706	EhG5364	gmst	complete	ATP-synt_ab|PF00006.25|1.1e-103,ATP-synt_ab_N|PF02874.23|8e-15,ATP-synt_ab_Xtn|PF16886.5|1.6e-43	proton-transporting ATPase activity, rotational mechanism	2.22386e+133	none	other localisation	OG0000836	Archaeplastida	NA
EhG39411.1	NA	NA	-0.1367	0.0415066	3	3	0.909597	EhG16712	gmst	complete	Porphobil_deam|PF01379.20|2.5e-71,Porphobil_deamC|PF03900.15|5.8e-16	porphobilinogen deaminase	8.96093e+28	none	signal peptide	OG0002589	Archaeplastida	NA
EhG39430.1	NA	NA	-0.265129	0.0286943	3	3	0.832124	EhG16731	gmst	complete	His_Phos_1|PF00300.22|2e-24,His_Phos_1|PF00300.22|0.00013	regulation of pentose-phosphate shunt	2.8292e+92	none	other localisation	OG0000234	Archaeplastida	NA
EhG39451.1	NA	NA	-0.192942	0.00923137	3	3	0.87482	EhG11691	gmst	complete	ketoacyl-synt|PF00109.26|3.5e-54,Ketoacyl-synt_C|PF02801.22|8.1e-39	3-oxoacyl-[acyl-carrier-protein] synthase activity		none	signal peptide	OG0000409	Archaeplastida	NA
EhG39455.11	NA	NA	-0.38814	0.000716692	3	3	0.764114	EhG11687	getorf	complete	NA	Chlorophyll A-B binding protein	8.98364e+52	Name:Lhcf56:Stephane Lefebvre:2010-08-31 Description:Light harvesting chlorophyll a/c binding protein. Part of diatoms & haptophytes group III.:Stephane Lefebvre:2010-08-31 Model Notes:No issues:Stephane Lefebvre:2010-08-31 Defline:Light harvesting protein:Stephane Lefebvre:2010-08-31 Disposition:Catalog:Stephane Lefebvre:2010-08-31 EST evidence:No:Stephane Lefebvre:2010-08-31	signal peptide	OG0000209	SAR/Hapista	NA
EhG39486.1	NA	NA	-0.319962	0.00701251	3	3	0.801091	EhG11650	gmst	complete	AMP-binding|PF00501.28|4.6e-79	decanoate-CoA ligase activity		none	signal peptide	OG0000136	Archaeplastida	NA
EhG3959.1	NA	NA	-0.179294	0.041752	3	3	0.883135	EhG5343	gmst	complete	HEAT_2|PF13646.6|4.9e-07,Coatomer_g_Cpla|PF16381.5|1.3e-28,Cnd1|PF12717.7|3.1e-07,COP-gamma_platf|PF08752.10|2.6e-40,Adaptin_N|PF01602.20|4.5e-116	intracellular protein transport	4.14125e+56	none	other localisation	OG0001427	Archaeplastida	NA
EhG39681.3	NA	NA	-0.265334	0.00701251	3	3	0.832006	EhG7516	gmst	complete	NA	NA		none	other localisation	OG0002642	Phaocystales	NA
EhG39685.1	NA	NA	-0.511866	0.0350181	3	3	0.701315	EhG7520	gmst	complete	CBS|PF00571.28|3.7e-05,CBS|PF00571.28|1.6e-05,CBS|PF00571.28|6.6e-08	PB1 domain		none	other localisation	OG0001815	Archaeplastida	NA
EhG39686.4	NA	NA	-0.265363	0.015577	3	3	0.83199	EhG7521	gmst	complete	Chloroa_b-bind|PF00504.21|6.6e-34	Chlorophyll A-B binding protein	213754,46924,77826,279253,88043,88044,88045,90716,90717,90718,262743,262744,262745,265455,265456,265457,269607,274730,406181,406182,406183,406184,406185,413445,413446,413447,413448,413449,398711,401305,104320,122197,357438,357439,357440,357441,357442,373050,373051,373052,373053,373054,311439,317541	none	signal peptide	OG0000209	SAR/Hapista	NA
EhG39687.1	NA	NA	-0.130519	0.0356203	3	3	0.913502	EhG7522	gmst	complete	DEAD|PF00270.29|3.9e-20,Helicase_C|PF00271.31|1.6e-07,Helicase_PWI|PF18149.1|2.1e-33,DEAD|PF00270.29|9e-26,ResIII|PF04851.15|6.7e-11,Sec63|PF02889.16|4.5e-86,ResIII|PF04851.15|2.5e-07,Sec63|PF02889.16|3.8e-75	response to ionizing radiation		none	other localisation	OG0000221	Archaeplastida	NA
EhG39825.2	NA	NA	-0.237126	0.0348021	3	3	0.848434	EhG33901	gmst	complete	NA	NA		none	signal peptide	OG0012723	E_huxleyi	NA
EhG39835.2	NA	NA	-0.205381	0.015577	3	3	0.867309	EhG33909	gmst	complete	PGM_PMM_II|PF02879.16|3.9e-09,PGM_PMM_I|PF02878.16|2e-28,PGM_PMM_III|PF02880.16|6.6e-21	phosphoglucomutase activity		none	other localisation	OG0001110	Archaeplastida	NA
EhG39936.1	NA	NA	-0.521945	0.000152137	3	3	0.696432	EhG6141	gmst	5primepartial	TPR_17|PF13431.6|0.00063,TPR_1|PF00515.28|0.00072,TPR_2|PF07719.17|2e-05,TPR_9|PF13371.6|0.00067,TPR_16|PF13432.6|0.00035,TPR_1|PF00515.28|2.7e-06,TPR_1|PF00515.28|0.00031,TPR_2|PF07719.17|0.00021,TPR_11|PF13414.6|7e-07,TPR_1|PF00515.28|0.0007,TPR_1|PF00515.28|0.00023	NA		none	other localisation	OG0005998	Phaocystales	NA
EhG40006.1	NA	NA	-0.271024	0.00280136	3	3	0.828731	EhG11120	getorf	complete	NA	aminomethyltransferase activity		none	mitochondrion	OG0002251	Archaeplastida	NA
EhG40008.22	NA	NA	-0.330565	0.00182114	3	3	0.795225	EhG11123,EhG11124	gmst	complete	Chloroa_b-bind|PF00504.21|1.9e-33	Chlorophyll A-B binding protein	4.54765e+123	none	signal peptide	OG0000209	SAR/Hapista	NA
EhG40019.1	NA	NA	-0.426678	0.0101474	3	3	0.743973	EhG11133	gmst	complete	CNOT11|PF10155.9|4.1e-54	gene silencing by RNA	2.78946e+23	none	other localisation	OG0002671	Archaeplastida	NA
EhG40037.13	NA	NA	-0.539246	0.000364891	3	3	0.68813	EhG11145	gmst	complete	Chloroa_b-bind|PF00504.21|4e-25	Chlorophyll A-B binding protein		none	chloroplast	OG0000032	SAR/Hapista	NA
EhG40126.15	NA	NA	-1.17778	6.78914e-05	3	3	0.44203	EhG16133	gmst	complete	Na_Ca_ex|PF01699.24|7.8e-24,Na_Ca_ex|PF01699.24|2.4e-22	calcium, potassium:sodium antiporter activity		none	signal anchor	OG0000741	E_huxleyi	Coccolithophore specific in 1/6 species
EhG40174.2	NA	NA	-0.275772	0.00259959	3	3	0.826008	EhG16181	gmst	complete	DEAD|PF00270.29|5.8e-05,HMG_box|PF00505.19|6.2e-10,ResIII|PF04851.15|1.1e-11,Helicase_C|PF00271.31|3.1e-20,HAND|PF09110.11|2.2e-05,SLIDE|PF09111.10|2.9e-36,SNF2_N|PF00176.23|6.4e-74,HMG_box_2|PF09011.10|1.1e-07	helicase activity		none	other localisation	OG0000007	Archaeplastida	NA
EhG40202.1	NA	NA	-0.171691	0.0145049	3	3	0.887802	EhG42971	gmst	complete	Mito_carr|PF00153.27|2.1e-10,Mito_carr|PF00153.27|4.5e-14,Mito_carr|PF00153.27|0.00023	phosphate ion transmembrane transport	8.80083e+34	none	other localisation	OG0000249	Archaeplastida	NA
EhG40309.4	NA	NA	-0.309481	0.00894593	2	2	0.806932	EhG25775	gmst	complete	E1_DerP2_DerF2|PF02221.15|3.7e-09	NA		none	signal peptide	OG0011812	Haptophyta	NA
EhG40321.3	NA	NA	-0.173616	0.01467	3	3	0.886618	EhG25762	gmst	complete	Notch|PF00066.17|1.7e-07,Notch|PF00066.17|2.4e-06,Notch|PF00066.17|1.1e-05,Kringle|PF00051.18|5.8e-16,Notch|PF00066.17|8e-07,Kringle|PF00051.18|2.5e-20	transmembrane receptor protein tyrosine kinase activity		none	signal peptide	OG0000324	Archaeplastida	NA
EhG40457.1	NA	NA	-0.197301	0.00856024	3	3	0.872181	NA	gmst	complete	Amino_oxidase|PF01593.24|3.5e-51,FAD_oxidored|PF12831.7|0.00039,NAD_binding_8|PF13450.6|1.1e-10,DAO|PF01266.24|0.00011	Catalyzes the 6-electron oxidation of protoporphyrinogen-IX to form protoporphyrin-IX		none	mitochondrion	OG0003204	Archaeplastida	NA
EhG40658.4	NA	NA	-0.41972	0.000598182	3	3	0.74757	EhG13014	getorf	complete	NA	maturation of LSU-rRNA from tricistronic rRNA transcript (SSU-rRNA, 5.8S rRNA, LSU-rRNA)	8.65889e+165	none	other localisation	OG0001091	Archaeplastida	NA
EhG40669.2	NA	NA	-0.837032	0.000231499	3	3	0.559794	NA	gmst	complete	Pentapeptide_4|PF13599.6|4.1e-06,Pentapeptide|PF00805.22|1.5e-06,Pentapeptide_4|PF13599.6|4.5e-06,Pentapeptide_4|PF13599.6|7e-09,Pentapeptide_4|PF13599.6|6.7e-08,Pentapeptide|PF00805.22|2.6e-08,Pentapeptide|PF00805.22|4.3e-07,Pentapeptide_3|PF13576.6|1.2e-06,Pentapeptide_4|PF13599.6|4e-10,Pentapeptide|PF00805.22|0.0006,Pentapeptide_4|PF13599.6|3.9e-09,Pentapeptide|PF00805.22|2.9e-06,Pentapeptide_…	protein homooligomerization		none	signal peptide	OG0027176	Gephyrocapsa	Coccolithophore specific in 2/6 species
EhG40703.2	NA	NA	-0.279475	0.00342028	3	3	0.823891	EhG12929	gmst	complete	Ribosomal_S17|PF00366.20|1.3e-20,Ribosomal_S17_N|PF16205.5|4.1e-29	rRNA binding	8.65504e+46	none	other localisation	OG0002332	Archaeplastida	NA
EhG40709.2	NA	NA	-1.17504	0.000177188	3	3	0.442872	EhG2867	gmst	complete	ATP-synt_D|PF01813.17|1.8e-29,ATP-synt_D|PF01813.17|1.8e-20	ATPase activity, coupled to transmembrane movement of substances		none	other localisation	OG0002623	Archaeplastida	NA
EhG40865.1	NA	NA	-0.288101	0.00259959	3	3	0.818979	EhG6864	gmst	complete	cobW|PF02492.19|1.2e-56,CobW_C|PF07683.14|3.2e-18	ATP binding		none	other localisation	OG0000029	Archaeplastida	NA
EhG40970.1	NA	NA	-0.226848	0.00863664	3	3	0.8545	EhG27809,EhG40971	gmst	complete	Sulfotransfer_1|PF00685.27|7.5e-26	sulfotransferase activity	4.08031e+65	none	other localisation	OG0006011	Archaeplastida	NA
EhG41066.1	NA	NA	-0.953326	0.000582171	3	3	0.516441	EhG15515	gmst	complete	NA	NA		none	other localisation	OG0023362	Gephyrocapsa	Coccolithophore specific in 2/6 species
EhG41068.1	NA	NA	-0.392373	0.000815685	3	3	0.761876	EhG15516	gmst	complete	NA	lithium:proton antiporter activity		none	signal anchor	OG0004187	Archaeplastida	NA
EhG41086.1	NA	NA	-0.249498	0.00615338	3	3	0.841189	EhG15526	gmst	complete	Form_Nir_trans|PF01226.17|4e-66	Formate/nitrite transporter		none	signal peptide	OG0000446	Archaeplastida	NA
EhG41179.1	NA	NA	-0.407996	0.000422126	3	3	0.75367	EhG17258	getorf	complete	NA	NA	4.13146e+29	none	signal peptide	OG0002642	Phaocystales	NA
EhG41229.1	NA	NA	-0.400813	0.000484161	3	3	0.757431	EhG22939	gmst	complete	Ribosomal_S3_C|PF00189.20|1.1e-21,KH_2|PF07650.17|1.1e-11	oxidized purine nucleobase lesion DNA N-glycosylase activity	2.03084e+139	none	other localisation	OG0001658	Archaeplastida	NA
EhG41258.1	NA	NA	-0.245275	0.0127701	3	3	0.843655	EhG28980	gmst	complete	Glyco_transf_8|PF01501.20|2.7e-06	Glycosyl transferase family 8	3.99561e+17	none	other localisation	OG0000377	Archaeplastida	NA
EhG41271.1	NA	NA	-0.182507	0.015577	3	3	0.88117	EhG28968	gmst	complete	ECH_1|PF00378.20|5e-33,3HCDH|PF00725.22|5.7e-21,ECH_2|PF16113.5|5e-18,3HCDH_N|PF02737.18|1.8e-56,3HCDH|PF00725.22|0.00026	enoyl-CoA hydratase activity	3.61911e+17	none	other localisation	OG0000513	Archaeplastida	NA
EhG41354.2	NA	NA	-0.156985	0.0287569	3	3	0.896897	EhG31456	gmst	complete	CMAS|PF02353.20|0.00011,Methyltransf_31|PF13847.6|7.2e-08,Methyltransf_12|PF08242.12|1.9e-07,Mg-por_mtran_C|PF07109.11|2.4e-31,Methyltransf_25|PF13649.6|3.4e-11,Methyltransf_32|PF13679.6|0.00093,Methyltransf_11|PF08241.12|6.1e-07,Methyltransf_23|PF13489.6|1.2e-09	hexaprenyldihydroxybenzoate methyltransferase activity		none	other localisation	OG0003032	Archaeplastida	NA
EhG41437.1	NA	NA	-0.512649	0.000714909	3	3	0.700934	EhG28059	gmst	complete	Ank_2|PF12796.7|2.5e-08,Pkinase|PF00069.25|6.4e-61,Ank_2|PF12796.7|1.9e-10,Ank_5|PF13857.6|3.1e-05,U-box|PF04564.15|4.9e-08,Ank_4|PF13637.6|8e-06,Ank_2|PF12796.7|4.8e-06,Ank_4|PF13637.6|1.1e-07,Pkinase_Tyr|PF07714.17|7.3e-31	cAMP-dependent protein kinase activity		none	other localisation	OG0008668	Haptophyta	NA
EhG41453.2	NA	NA	-0.250331	0.0054473	3	3	0.840704	EhG28045	gmst	complete	DXP_synthase_N|PF13292.6|0.00074,E1_dh|PF00676.20|9.3e-100	pyruvate dehydrogenase (acetyl-transferring) activity	2.80173e+29	Defline:Pyruvate dehydrogenase E1	mitochondrion	OG0001052	Archaeplastida	NA
EhG41456.3	NA	NA	-0.186076	0.00817832	3	3	0.878993	EhG28042,EhG42846	gmst	complete	DXP_reductoisom|PF02670.16|1.6e-42,DXP_redisom_C|PF08436.12|3.2e-35,DXPR_C|PF13288.6|6e-38	1-deoxy-D-xylulose-5-phosphate reductoisomerase activity		none	other localisation	OG0003126	Archaeplastida	NA
EhG41640.2	C2 domain containing protein	membrane attachment domain	-0.588037	0.00202434	2	2	0.665248	EhG10029	gmst	complete	C2|PF00168.30|0.00014	NA		none	other localisation	OG0002531	SAR/Hapista	NA
EhG41644.3	NA	NA	-0.134686	0.0279665	3	3	0.910868	EhG10031	gmst	complete	RRM_1|PF00076.22|5.3e-21,RRM_1|PF00076.22|3.1e-20,RRM_1|PF00076.22|1e-19,RRM_1|PF00076.22|2e-19,PABP|PF00658.18|4.1e-28	RNA binding	8.83379e+79	none	other localisation	OG0000607	Archaeplastida	NA
EhG41653.1	NA	NA	-0.310435	0.0118017	2	2	0.806399	EhG28535	gmst	complete	DUF2061|PF09834.9|5.9e-11,DUF2061|PF09834.9|4.6e-13	Predicted membrane protein (DUF2061)		none	signal peptide	OG0006590	Archaeplastida	NA
EhG41718.6	NA	NA	-0.283309	0.00206083	3	3	0.821704	EhG15222	gmst	complete	GFO_IDH_MocA|PF01408.22|7.8e-25,EF-hand_7|PF13499.6|1.4e-07,EF-hand_1|PF00036.32|4.3e-05,EF-hand_8|PF13833.6|4.7e-08,GFO_IDH_MocA_C|PF02894.17|8.8e-06	Oxidoreductase family, NAD-binding Rossmann fold		none	signal peptide	OG0000540	Archaeplastida	NA
EhG41765.1	NA	NA	-0.180331	0.0144417	3	3	0.882501	EhG32100	gmst	complete	NA	NA		none	other localisation	OG0040710	E_huxleyi	NA
EhG41932.6	NA	NA	-0.398111	0.000815685	3	3	0.758851	EhG13999	gmst	complete	EF-hand_8|PF13833.6|3.3e-05,EF-hand_6|PF13405.6|1.2e-06,EF-hand_1|PF00036.32|8e-06,EF-hand_7|PF13499.6|0.0008,Pkinase|PF00069.25|2.3e-67,EF-hand_1|PF00036.32|0.00032,EF-hand_5|PF13202.6|0.00011,Pkinase_Tyr|PF07714.17|1.9e-31,Kinase-like|PF14531.6|3.7e-06,EF-hand_6|PF13405.6|4.4e-05,Kdo|PF06293.14|0.00031,EF-hand_7|PF13499.6|6e-08,EF-hand_5|PF13202.6|1.7e-06	protein serine/threonine kinase activity		none	other localisation	OG0000003	Archaeplastida	NA
EhG41947.1	NA	NA	-0.302683	0.0184793	3	3	0.810743	EhG31789	gmst	complete	Cpn10|PF00166.21|3.7e-07	NA	2.06607e+71	none	signal peptide	OG0009450	Haptophyta	NA
EhG41967.1	NA	NA	-0.25729	0.0210658	3	3	0.836658	EhG31810,EhG33485	getorf	complete	NA	metalloexopeptidase activity		none	other localisation	OG0001130	Archaeplastida	NA
EhG42205.41	NA	NA	-0.469778	0.000207085	3	3	0.722076	EhG9994	gmst	complete	MreB_Mbl|PF06723.13|8.9e-17,HSP70|PF00012.20|4.3e-263	ATP binding	2.8264e+91	none	signal peptide	OG0000031	Archaeplastida	NA
EhG42374.1	NA	NA	-0.385046	0.0182402	3	3	0.765755	NA	gmst	complete	Epimerase|PF01370.21|3.5e-13,NAD_binding_4|PF07993.12|8.4e-51,adh_short|PF00106.25|1.3e-47,Polysacc_synt_2|PF02719.15|0.00018,NAD_binding_10|PF13460.6|0.00025,AMP-binding|PF00501.28|2.1e-65,KR|PF08659.10|3.6e-13,AMP-binding_C|PF13193.6|1.4e-05,adh_short_C2|PF13561.6|2.2e-32,Polysacc_synt_2|PF02719.15|0.00027,PP-binding|PF00550.25|7e-14	phosphopantetheine binding	4.50865e+29	none	other localisation	OG0004343	Archaeplastida	NA
EhG42504.1	NA	NA	-0.245461	0.00831131	3	3	0.843546	EhG21562	gmst	complete	MMR_HSR1|PF01926.23|3.3e-07,GTP_EFTU|PF00009.27|2.8e-49,GTP_EFTU_D2|PF03144.25|0.00016,EFG_C|PF00679.24|4.5e-20	GTPase activity	280605	none	signal peptide	OG0001138	Archaeplastida	NA
EhG42518.1	NA	NA	-0.17514	0.041752	3	3	0.885682	EhG20561	gmst	complete	Fasciclin|PF02469.22|1.2e-07	Four repeated domains in the Fasciclin I family of proteins, present in many other contexts.	2.22784e+119	none	signal peptide	OG0004831	SAR/Hapista	NA
EhG43145.3	NA	NA	-0.977982	0.00189824	3	3	0.50769	EhG36849	gmst	complete	V_ATPase_I|PF01496.19|6.3e-229	vacuolar proton-transporting V-type ATPase complex assembly		none	other localisation	OG0000364	Archaeplastida	NA
EhG43225.5	NA	NA	-0.347748	0.00109039	3	3	0.78581	EhG12484,EhG17878,EhG42610	gmst	complete	Ribosomal_S8e|PF01201.22|4.2e-56	structural constituent of ribosome	8.70983e+58	none	other localisation	OG0001359	Archaeplastida	NA
EhG43232.1	NA	NA	-0.304856	0.00202434	3	3	0.809523	NA	gmst	complete	Glyco_hydro_16|PF00722.21|0.00049,Glyco_hydro_16|PF00722.21|0.00017	Glucan endo-1,3-beta-D-glucosidase		none	signal peptide	OG0010398	Prymnesiales	NA
EhG43312.10	NA	NA	-0.165816	0.0218422	3	3	0.891424	EhG15783	gmst	complete	Gp_dh_N|PF00044.24|1.6e-32,Gp_dh_C|PF02800.20|1.1e-43	Belongs to the glyceraldehyde-3-phosphate dehydrogenase family		none	other localisation	OG0000137	Archaeplastida	NA
EhG43334.3	NA	NA	-0.279475	0.00243267	3	3	0.823891	EhG33767	gmst	complete	Chloroa_b-bind|PF00504.21|1e-31	light harvesting protein	2.658e+40	none	other localisation	OG0002309	SAR/Hapista	NA
EhG43369.1	NA	NA	-0.214713	0.00379488	3	3	0.861718	EhG7707	gmst	complete	GTP_EFTU_D2|PF03144.25|9.2e-19,GTP_EFTU|PF00009.27|1.3e-57,MMR_HSR1|PF01926.23|0.00013,GTP_EFTU_D3|PF03143.17|1.3e-28	GTP-dependent binding of aminoacyl-tRNA to the A-site of ribosomes during protein biosynthesis		none	mitochondrion	OG0000964	Archaeplastida	NA
EhG43475.1	NA	NA	-0.33804	0.00141327	3	3	0.791116	EhG29362	getorf	complete	NA	regulation of photosynthesis, light reaction		none	signal peptide	OG0000063	Archaeplastida	NA
EhG43482.48	NA	NA	-0.639021	0.00016465	3	3	0.642149	EhG29367	gmst	complete	SBP_bac_5|PF00496.22|2.7e-43,SBP_bac_5|PF00496.22|1.2e-07	Bacterial extracellular solute-binding proteins, family 5 Middle		none	other localisation	OG0001844	SAR/Hapista	NA
EhG43554.2	NA	NA	-0.296411	0.00143991	3	3	0.814276	EhG27381	transdec	complete	Ribosomal_S7e|PF01251.18|8.9e-85	Belongs to the eukaryotic ribosomal protein eS7 family		none	other localisation	OG0001788	Archaeplastida	NA
EhG4359.14	NA	NA	-0.201424	0.0111426	3	3	0.869692	EhG11077	gmst	complete	FAD-oxidase_C|PF02913.19|2.9e-58,FAD_binding_4|PF01565.23|6.8e-37	D-2-hydroxyglutarate dehydrogenase, mitochondrial. Source PGD		none	mitochondrion	OG0000711	Archaeplastida	NA
EhG43671.1	NA	NA	-1.2367	5.11104e-05	3	3	0.424341	NA	gmst	complete	NA	NA		none	signal peptide	OG0017027	Prymnesiales	NA
EhG4378.3	NA	NA	-0.762076	0.00105561	3	3	0.589647	EhG11059	gmst	complete	MFS_2|PF13347.6|2.1e-05,MFS_1|PF07690.16|3.3e-05,MFS_1|PF07690.16|1.3e-11	cellular response to nitrate		none	signal anchor	OG0000167	Archaeplastida	NA
EhG43802.20	NA	NA	-0.43564	0.000447248	3	3	0.739366	EhG33742	gmst	complete	vATP-synt_AC39|PF01992.16|6.4e-113	proton-exporting ATPase activity, phosphorylative mechanism	8.83813e+39	none	other localisation	OG0001024	Archaeplastida	NA
EhG43827.11	NA	NA	-0.38175	0.00108686	3	3	0.767506	EhG43115	gmst	complete	Ribosomal_L18|PF17135.4|2.5e-74	ribosomal protein		none	other localisation	OG0001527	Archaeplastida	NA
EhG4388.3	NA	NA	-0.448309	0.00435131	3	3	0.732901	EhG11003	getorf	complete	NA	One of the proteins that surrounds the polypeptide exit tunnel on the outside of the subunit		none	chloroplast	OG0001465	Archaeplastida	NA
EhG44000.3	NA	NA	-0.470759	0.0115414	3	3	0.721585	EhG11291	getorf	complete	NA	structural constituent of ribosome		none	other localisation	OG0003373	Archaeplastida	NA
EhG44039.1	NA	NA	-0.331893	0.0252026	3	3	0.794493	EhG37215	getorf	complete	NA	NA		none	chloroplast	OG0007479	Archaeplastida	NA
EhG44284.10	NA	NA	-0.35935	0.00792721	3	3	0.779516	EhG34866,EhG38215,EhG38687	gmst	5primepartial	S-AdoMet_synt_M|PF02772.16|2.8e-38,S-AdoMet_synt_C|PF02773.16|6.5e-15	methionine adenosyltransferase activity		none	other localisation	OG0055172	E_huxleyi	Coccolithophore specific in 1/6 species
EhG4438.1	NA	NA	-0.129409	0.0449214	3	3	0.914206	EhG11004	gmst	complete	Thr_dehydrat_C|PF00585.18|6.7e-09,PALP|PF00291.25|5.9e-37,Thr_dehydrat_C|PF00585.18|4.4e-16,PALP|PF00291.25|1.2e-28	L-threonine ammonia-lyase activity		none	mitochondrion	OG0000410	Archaeplastida	NA
EhG44496.10	NA	NA	-0.131569	0.0405431	3	3	0.912838	EhG24989,EhG3397	gmst	complete	Roc|PF08477.13|3.2e-29,MMR_HSR1|PF01926.23|4.2e-06,Ras|PF00071.22|7.2e-14,Arf|PF00025.21|1.2e-07,Ras|PF00071.22|1.9e-38	GTP binding		none	other localisation	OG0000527	Archaeplastida	NA
EhG4452.2	NA	NA	-0.364317	0.018791	3	3	0.776837	EhG10992	gmst	complete	NA	NA	109179110445	none	chloroplast	OG0009065	Haptophyta	NA
EhG4516.7	NA	NA	-0.358579	0.00165452	3	3	0.779932	EhG10926,EhG10927	gmst	complete	TauD|PF02668.16|2e-11	Taurine catabolism dioxygenase TauD, TfdA family		none	signal peptide	OG0001220	Archaeplastida	NA
EhG4529.2	Phosphoglycerate kinase		-0.60419	0.000127398	3	3	0.657841	EhG10914	gmst	complete	PGK|PF00162.19|5.1e-159	phosphoglycerate kinase activity		none	signal peptide	OG0000208	Archaeplastida	NA
EhG4529.76	NA	NA	-0.266263	0.0252078	3	3	0.83147	EhG10914	gmst	5primepartial	PGK|PF00162.19|4.1e-17,PGK|PF00162.19|3.7e-54	Belongs to the phosphoglycerate kinase family		none	other localisation	NA	E_huxleyi	No Orthogroup
EhG4644.3	NA	NA	-0.36503	0.00107255	3	3	0.776453	EhG11720	transdec	complete	NA	NA		none	other localisation	OG0014383	Prymnesiales	NA
EhG4733.2	NA	NA	-0.209422	0.0317806	3	3	0.864883	EhG34651	getorf	complete	NA	isoprenoid biosynthetic process	2.83468e+29	none	signal peptide	OG0000315	Archaeplastida	NA
EhG4785.1	NA	NA	-0.265048	0.0207509	3	3	0.832171	EhG20296	gmst	complete	LeuA_dimer|PF08502.10|7.1e-10,LeuA_dimer|PF08502.10|2.4e-05,HMGL-like|PF00682.19|5.3e-49	Belongs to the alpha-IPM synthase homocitrate synthase family		none	mitochondrion	OG0001202	Archaeplastida	NA
EhG4802.2	NA	NA	-0.22468	0.0166857	3	3	0.855785	EhG20276	gmst	complete	HAT|PF02184.16|0.00013,TPR_14|PF13428.6|0.00017,Suf|PF05843.14|1.8e-05,Suf|PF05843.14|0.00034,HAT|PF02184.16|4.9e-08	spliceosomal complex assembly		none	other localisation	OG0001825	Archaeplastida	NA
EhG4837.5	NA	NA	-0.678556	0.000293463	3	3	0.62479	EhG20243	gmst	complete	UDPGP|PF01704.18|1.6e-120	Utp--glucose-1-phosphate uridylyltransferase	238348251921	none	other localisation	OG0000542	Archaeplastida	NA
EhG4945.7	NA	NA	-0.384641	0.000881398	3	3	0.765969	NA	gmst	complete	Thioesterase|PF00975.20|5e-11,PP-binding|PF00550.25|0.00038,AMP-binding|PF00501.28|2.6e-73,Methyltransf_23|PF13489.6|4.4e-05,Methyltransf_12|PF08242.12|0.00016,Methyltransf_25|PF13649.6|6.9e-06	phosphopantetheine binding		none	other localisation	OG0001087	Archaeplastida	NA
EhG5053.1	NA	NA	-0.672738	0.000142285	3	3	0.627315	EhG4192	gmst	complete	Methyltransf_3|PF01596.17|0.00029,Methyltransf_24|PF13578.6|3e-11	Methyltransferase domain	218150	none	other localisation	OG0019657	SAR/Hapista	NA
EhG5188.4	NA	NA	-0.288961	0.0119454	3	3	0.818491	EhG4051	gmst	5primepartial	Ribosomal_L26|PF16906.5|4.1e-37	regulation of translation involved in cellular response to UV		none	other localisation	OG0002109	Archaeplastida	NA
EhG5340.1	NA	NA	-0.36366	0.000699798	3	3	0.77719	EhG3962	gmst	complete	Cpn60_TCP1|PF00118.24|1.5e-152	protein binding involved in protein folding	280895270995	none	other localisation	OG0002522	Archaeplastida	NA
EhG5365.1	NA	NA	-0.360273	0.0358497	3	3	0.779017	EhG3935	getorf	complete	NA	Fatty acid desaturase	312352	none	signal peptide	OG0001281	Archaeplastida	NA
EhG5501.4	NA	NA	-0.416684	0.00421716	3	3	0.749144	EhG28333	getorf	complete	NA	assembly of large subunit precursor of preribosome		none	other localisation	OG0001705	Archaeplastida	NA
EhG5526.3	NA	NA	-0.375711	0.0172355	3	3	0.770726	EhG29032	gmst	complete	tRNA-synt_1b|PF00579.25|1.4e-72	tyrosyl-tRNA aminoacylation		none	signal peptide	OG0003173	Archaeplastida	NA
EhG5534.1	NA	NA	-0.297005	0.00215072	3	3	0.813941	EhG29037	gmst	5primepartial	EF-hand_7|PF13499.6|1.1e-08,FKBP_C|PF00254.28|3.8e-27	peptidyl-prolyl cis-trans isomerase activity	8.77809e+56	none	signal peptide	OG0000021	Archaeplastida	NA
EhG5583.1	NA	NA	-0.440942	0.00673956	2	2	0.736654	EhG29080	gmst	complete	Methyltransf_12|PF08242.12|1.9e-13,PrmA|PF06325.13|0.00087,Methyltransf_23|PF13489.6|1.3e-14,Methyltransf_25|PF13649.6|9e-23,Methyltransf_31|PF13847.6|1.1e-19,Ubie_methyltran|PF01209.18|1.9e-20,Methyltransf_11|PF08241.12|9.5e-25,MTS|PF05175.14|3.2e-05	ubiE/COQ5 methyltransferase family		none	other localisation	OG0008449	SAR/Hapista	NA
EhG5611.1	NA	NA	-0.226853	0.0250324	3	3	0.854497	EhG29104	gmst	complete	TPR_16|PF13432.6|9.4e-05,TPR_2|PF07719.17|0.00075,TPR_1|PF00515.28|0.0002,TPR_1|PF00515.28|1.2e-05,TPR_12|PF13424.6|0.00032,STI1|PF17830.1|3.9e-22,TPR_1|PF00515.28|8.1e-06,STI1|PF17830.1|1.4e-15,TPR_2|PF07719.17|8.5e-05,TPR_8|PF13181.6|0.00046,TPR_2|PF07719.17|0.0005,TPR_11|PF13414.6|0.00011,TPR_1|PF00515.28|0.00062,TPR_12|PF13424.6|2.8e-07,TPR_2|PF07719.17|0.00039,TPR_1|PF00515.28|9e-05,TPR_1|PF…	Heat shock chaperonin-binding motif.		none	other localisation	OG0000092	Archaeplastida	NA
EhG564.2	NA	NA	-0.33279	0.0219522	2	2	0.794	EhG18084	gmst	complete	Sds3|PF08598.11|0.00062	SET domain	4.02392e+35	none	other localisation	OG0006686	Haptophyta	NA
EhG569.4	NA	NA	-0.710281	0.000152137	3	3	0.611201	EhG18089	gmst	complete	V-ATPase_C|PF03223.15|2.8e-93	proton-exporting ATPase activity, phosphorylative mechanism		none	other localisation	OG0001399	Archaeplastida	NA
EhG5734.1	NA	NA	-0.231527	0.0195458	3	3	0.851733	EhG22884	gmst	complete	FAD_binding_3|PF01494.19|4e-08,FAD_binding_3|PF01494.19|0.0001,DAO|PF01266.24|2.2e-05,NAD_binding_8|PF13450.6|0.00032,FAD_binding_2|PF00890.24|0.00033	FAD binding	124246	none	signal peptide	OG0000549	Archaeplastida	NA
EhG5810.7	NA	NA	-0.145086	0.0280516	3	3	0.904325	EhG37707	gmst	complete	AAA_16|PF13191.6|1.5e-05,AAA_2|PF07724.14|1.5e-05,AAA_22|PF13401.6|1.1e-07,AAA|PF00004.29|5.9e-35,AAA_5|PF07728.14|4.7e-05,AAA_lid_3|PF17862.1|2.9e-08,Prot_ATP_ID_OB|PF16450.5|6.9e-08	proteasome-activating ATPase activity		none	other localisation	OG0000623	Archaeplastida	NA
EhG5884.1	NA	NA	-0.171909	0.0495188	3	3	0.887667	EhG37957	gmst	complete	F_bP_aldolase|PF01116.20|1.4e-86	fructose-bisphosphate aldolase activity	4.132e+23	none	signal peptide	OG0000389	Archaeplastida	NA
EhG5925.1	NA	NA	-0.190649	0.00724729	3	3	0.876211	EhG42345	gmst	complete	PNTB|PF02233.16|3.6e-159,PNTB_4TM|PF12769.7|2.3e-26,TPP_enzyme_M|PF00205.22|9.6e-05,AlaDh_PNT_N|PF05222.15|6.1e-35,AlaDh_PNT_C|PF01262.21|3.2e-64	Transhydrogenase	405413405414	none	other localisation	OG0000792	Archaeplastida	NA
EhG6053.1	NA	NA	-0.943395	0.00366231	3	3	0.520008	NA	gmst	complete	NA	NA		none	other localisation	OG0081615	Gephyrocapsa	Coccolithophore specific in 2/6 species
EhG6141.1	NA	NA	-0.487134	0.0128645	2	2	0.713441	EhG39936	getorf	complete	NA	NA		none	other localisation	OG0005998	Phaocystales	NA
EhG6177.2	NA	NA	-0.474248	0.0457121	2	2	0.719842	EhG37591	gmst	complete	NA	NA		none	other localisation	NA	E_huxleyi	No Orthogroup
EhG6187.1	NA	NA	-0.26775	0.00943643	3	3	0.830614	EhG37601	gmst	complete	E1_dh|PF00676.20|0.00051,Transket_pyr|PF02779.24|7.6e-40,DXP_synthase_N|PF13292.6|7.6e-107,Transketolase_C|PF02780.20|1.7e-18,TPP_enzyme_C|PF02775.21|6.2e-06	transketolase activity	2.81777e+44	none	signal peptide	OG0003263	Archaeplastida	NA
EhG6213.3	NA	NA	-0.306289	0.00359985	3	3	0.808719	EhG15005	gmst	complete	NA	NA		none	other localisation	OG0016997	Isochrysidales	NA
EhG6223.2	NA	NA	-0.195196	0.0251737	3	3	0.873454	EhG14996	gmst	complete	EMP70|PF02990.16|9e-218	positive regulation of protein exit from endoplasmic reticulum		none	signal peptide	OG0000079	Archaeplastida	NA
EhG624.4	NA	NA	-0.537703	0.000364891	3	3	0.688867	EhG6481	gmst	complete	ATP-synt|PF00231.19|3.7e-88	proton-transporting ATP synthase activity, rotational mechanism	1.97716e+121	none	chloroplast	OG0002341	Archaeplastida	NA
EhG626.21	NA	NA	-0.213591	0.00575385	3	3	0.862388	EhG6483	gmst	complete	Rieske_2|PF13806.6|3.5e-08	Rieske-like [2Fe-2S] domain		none	other localisation	OG0000841	Archaeplastida	NA
EhG6294.2	NA	NA	-0.14326	0.0277395	3	3	0.905471	EhG14939	getorf	complete	NA	chaperone cofactor-dependent protein refolding	6.05836e+29	none	signal peptide	OG0000821	Archaeplastida	NA
EhG6327.3	NA	NA	-0.175298	0.045764	3	3	0.885585	EhG14906	getorf	complete	NA	NA		none	mitochondrion	OG0018820	Zygodiscales	NA
EhG6353.1	NA	NA	-0.504595	0.00672975	2	2	0.704858	EhG14887	gmst	complete	MMPL|PF03176.15|5.4e-05,Patched|PF02460.18|2.6e-19,MMPL|PF03176.15|2.4e-08,Patched|PF02460.18|1.4e-07,Sterol-sensing|PF12349.8|9.1e-14	patched ligand maturation	371747	none	signal anchor	OG0000365	Archaeplastida	NA
EhG6437.1	NA	NA	-0.524253	0.000443633	3	3	0.695319	EhG13855,EhG21500	gmst	complete	NA	NA	2.4162e+27	none	chloroplast	OG0005625	Phaocystales	NA
EhG6473.1	NA	NA	-0.500887	0.000202229	3	3	0.706672	EhG615	gmst	complete	AAA_lid_2|PF17863.1|1.8e-12,MCM|PF00493.23|5.1e-08,Mg_chelatase|PF01078.21|1.2e-08,VWA_2|PF13519.6|1e-12,VWA|PF00092.28|2.5e-08	ligase activity, forming nitrogen-metal bonds, forming coordination complexes	402356350523	none	signal peptide	OG0001308	Archaeplastida	NA
EhG6475.1	NA	NA	-1.30549	2.55848e-05	3	3	0.404582	EhG617	gmst	complete	NA	NA		none	signal peptide	OG0001684	Archaeplastida	NA
EhG6507.5	NA	NA	-0.195935	0.00774426	3	3	0.873007	EhG675	gmst	complete	FAD_oxidored|PF12831.7|0.0002,DAO|PF01266.24|9.4e-05,NAD_binding_8|PF13450.6|1.7e-16,Pyr_redox_2|PF07992.14|0.00011,Amino_oxidase|PF01593.24|2.4e-70,FAD_binding_2|PF00890.24|0.00053	Flavin containing amine oxidoreductase		none	other localisation	OG0000633	Archaeplastida	NA
EhG6639.1	NA	NA	-0.506982	0.00105817	3	3	0.703693	EhG32663,EhG32664,EhG6638	gmst	complete	Ribosomal_L3|PF00297.22|7.5e-181	Belongs to the universal ribosomal protein uL3 family	4.56825e+29	Defline:60S ribosomal protein L3:Mark van der Giezen:2009-09-10	other localisation	OG0001279	Archaeplastida	NA
EhG6644.3	NA	NA	-0.257586	0.00314454	3	3	0.836487	EhG32674,EhG6645	gmst	complete	NA	NA	281575	none	signal peptide	OG0005300	Archaeplastida	NA
EhG6705.1	NA	NA	-0.198434	0.00645494	3	3	0.871496	EhG32732	gmst	complete	ketoacyl-synt|PF00109.26|4.9e-38,Ketoacyl-synt_C|PF02801.22|2.1e-28	3-oxoacyl-[acyl-carrier-protein] synthase activity		none	other localisation	OG0000409	Archaeplastida	NA
EhG6932.1	NA	NA	-0.139305	0.0287293	3	3	0.907957	EhG17650	gmst	complete	Glycolytic|PF00274.19|4.8e-119	fructose-bisphosphate aldolase		none	other localisation	OG0000277	Archaeplastida	NA
EhG6975.1	NA	NA	-0.384173	0.00243993	3	3	0.766218	EhG17694	gmst	complete	Alpha_adaptin_C|PF02296.16|1.2e-18,Alpha_adaptinC2|PF02883.20|1.4e-14,Adaptin_N|PF01602.20|4.7e-114	intracellular protein transport	89892264606	none	other localisation	OG0001363	Archaeplastida	NA
EhG698.1	NA	NA	-0.167707	0.0368246	3	3	0.890256	EhG6531	gmst	complete	EF-hand_8|PF13833.6|1.6e-10,EF-hand_6|PF13405.6|4.2e-05,EF-hand_7|PF13499.6|2.9e-12,EF-hand_1|PF00036.32|5.5e-07,EF-hand_5|PF13202.6|0.00033,EF-hand_9|PF14658.6|8e-05,EF-hand_1|PF00036.32|2.3e-05	NA	6.06026e+29	none	signal peptide	OG0003017	Archaeplastida	NA
EhG7072.5	NA	NA	-0.455708	0.00423199	3	3	0.729152	EhG28719,EhG28720	gmst	complete	Mtc|PF03820.17|9.2e-91	ion transmembrane transporter activity	2.25105e+116	Defline:Sideroflexin:Bryony Williams:2009-09-10	signal peptide	OG0001786	Archaeplastida	NA
EhG7111.5	NA	NA	-0.404444	0.0127112	3	3	0.755528	EhG28762	getorf	complete	NA	P-P-bond-hydrolysis-driven protein transmembrane transporter activity	4.99416e+29	none	other localisation	OG0004320	Archaeplastida	NA
EhG7349.2	NA	NA	-0.281605	0.00365101	3	3	0.822675	EhG41613	gmst	complete	SURF4|PF02077.15|8.7e-53	COPII adaptor activity	4.05968e+83	none	signal anchor	OG0002884	Archaeplastida	NA
EhG738.1	NA	NA	-0.235225	0.0150319	3	3	0.849552	EhG6601	gmst	complete	Cpn60_TCP1|PF00118.24|2.9e-144	unfolded protein binding	362283	none	other localisation	OG0003438	Archaeplastida	NA
EhG7389.2	NA	NA	-0.13986	0.0225251	3	3	0.907607	EhG35248	getorf	complete	NA	GTP binding	255360	none	signal peptide	OG0007589	Archaeplastida	NA
EhG7426.1	NA	NA	-0.116952	0.0472846	3	3	0.922134	EhG35289	getorf	complete	NA	metallopeptidase activity	2.35051e+95	none	other localisation	OG0002678	Archaeplastida	NA
EhG7536.2	NA	NA	-0.257569	0.00757449	3	3	0.836496	EhG43627	gmst	complete	Polyketide_cyc2|PF10604.9|1.2e-11,Polyketide_cyc|PF03364.20|1.5e-09	NA		none	signal peptide	OG0000876	Archaeplastida	NA
EhG7591.1	NA	NA	-0.361942	0.00131169	3	3	0.778116	EhG43387	getorf	complete	NA	rRNA binding	3.57412e+23	none	other localisation	OG0001748	Archaeplastida	NA
EhG76.1	NA	NA	-0.288719	0.0472398	2	2	0.818629	EhG29852	getorf	complete	NA	N-terminal peptidyl-methionine acetylation	2.13905e+101	none	signal peptide	OG0003885	Archaeplastida	NA
EhG7703.4	NA	NA	-0.173205	0.0156857	3	3	0.88687	EhG41383	gmst	complete	Enolase_C|PF00113.22|3.1e-127,MAAL_C|PF07476.11|3.7e-06,MR_MLE_C|PF13378.6|5.9e-08,Enolase_N|PF03952.16|3.7e-49	phosphopyruvate hydratase activity	2.81147e+83	none	other localisation	OG0000408	Archaeplastida	NA
EhG7790.10	NA	NA	-0.474475	0.00143599	3	3	0.719729	EhG26997,EhG28681	getorf	complete	NA	PBP superfamily domain		none	other localisation	OG0001446	Archaeplastida	NA
EhG7854.2	NA	NA	-0.399881	0.00064089	3	3	0.757921	EhG27040	gmst	complete	Cpn60_TCP1|PF00118.24|4.6e-105	unfolded protein binding		none	other localisation	NA	E_huxleyi	No Orthogroup
EhG8120.2	NA	NA	-0.200535	0.015474	3	3	0.870228	EhG9768	gmst	complete	NA	NA		none	mitochondrion	OG0002541	SAR/Hapista	NA
EhG8153.2	NA	NA	-0.430104	0.0019856	3	3	0.742208	EhG9806	gmst	complete	NA	protein folding	3.6237e+35	none	signal peptide	OG0020803	Zygodiscales	NA
EhG8321.1	NA	NA	-0.157277	0.0203521	3	3	0.896716	NA	getorf	complete	NA	3-oxo-behenoyl-CoA reductase activity		none	signal peptide	OG0001583	Archaeplastida	NA
EhG8369.1	NA	NA	-0.222293	0.0338966	3	3	0.857202	NA	gmst	complete	NA	NA	1.97586e+47	none	signal peptide	OG0006213	Haptophyta	NA
EhG8380.1	NA	NA	-0.773087	0.00546461	3	3	0.585164	EhG38045	gmst	complete	CK_II_beta|PF01214.18|1.2e-63	protein kinase regulator activity	2.7583e+68	none	other localisation	OG0000860	Archaeplastida	NA
EhG8443.3	NA	NA	-0.654232	0.00022185	3	3	0.635414	EhG22019,EhG22020	gmst	complete	Rubredoxin|PF00301.20|9.8e-10	Rubredoxin	1.9745e+55	none	signal peptide	OG0003887	Archaeplastida	NA
EhG8499.5	NA	NA	-0.389614	0.00401878	3	3	0.763334	EhG22077	gmst	complete	Ribosomal_L29|PF00831.23|1.6e-19	ribosomal protein		none	other localisation	OG0001255	Archaeplastida	NA
EhG8541.1	NA	NA	-0.230881	0.00492389	3	3	0.852114	EhG22110	getorf	complete	NA	metalloendopeptidase activity		none	other localisation	OG0002327	Archaeplastida	NA
EhG8721.1	NA	NA	-0.312356	0.0141851	3	3	0.805326	EhG22762	gmst	complete	NA	NA		none	signal peptide	OG0041404	SAR/Hapista	NA
EhG8727.1	NA	NA	-0.285543	0.0028714	3	3	0.820433	EhG22769	gmst	complete	Thioredoxin_6|PF13848.6|2.6e-16,Calreticulin|PF00262.18|2.7e-07	intramolecular oxidoreductase activity, transposing S-S bonds	266171	none	signal peptide	OG0003827	Archaeplastida	NA
EhG8751.2	NA	NA	-0.245414	0.00950184	3	3	0.843574	EhG32828	gmst	5primepartial	EF-hand_6|PF13405.6|3.5e-08,EF-hand_5|PF13202.6|3.5e-08,EF-hand_7|PF13499.6|4.3e-08,EF-hand_1|PF00036.32|3.5e-08,EF-hand_1|PF00036.32|8.6e-09,EF-hand_8|PF13833.6|0.00029,EF-hand_5|PF13202.6|3.4e-07,EF-hand_6|PF13405.6|6.6e-08,EF-hand_7|PF13499.6|4.2e-06	Ca2 -binding protein (EF-Hand superfamily		none	mitochondrion	OG0000008	Archaeplastida	NA
EhG8767.7	NA	NA	-0.346755	0.00289913	3	3	0.786351	EhG32813	gmst	complete	Chloroa_b-bind|PF00504.21|3.4e-30	Chlorophyll A-B binding protein		none	mitochondrion	OG0000105	Archaeplastida	NA
EhG8768.2	NA	NA	-0.241043	0.0166336	3	3	0.846133	EhG32812	gmst	complete	NA	NA	1.94369e+58	none	signal peptide	OG0022903	Prymnesiales	NA
EhG8776.1	NA	NA	-0.508758	0.000680177	3	3	0.702827	EhG32803	gmst	complete	DUF1499|PF07386.11|1.2e-11	Protein of unknown function (DUF1499)		none	signal peptide	OG0001430	Archaeplastida	NA
EhG8789.2	NA	NA	-0.333496	0.00220527	3	3	0.793611	EhG32788	transdec	complete	ATP-synt_Eps|PF04627.13|1.1e-17	ATP synthesis coupled proton transport	349242	none	other localisation	OG0004191	Archaeplastida	NA
EhG8860.1	NA	NA	-0.45138	0.0167729	2	2	0.731343	EhG14309	gmst	complete	Response_reg|PF00072.24|0.00076	Belongs to the sodium solute symporter (SSF) (TC 2.A.21) family		none	other localisation	OG0006019	Prymnesiales	NA
EhG8867.3	NA	NA	-0.254345	0.0136375	3	3	0.838367	EhG14315	gmst	5primepartial	SF3b1|PF08920.10|6e-20	spliceosomal complex assembly	265565401505	none	other localisation	OG0001747	Archaeplastida	NA
EhG8908.2	NA	NA	-0.311062	0.00363473	3	3	0.806048	EhG14359	gmst	complete	NA	NA	2.7503e+23	none	other localisation	OG0010244	SAR/Hapista	NA
EhG8915.1	NA	NA	-0.24756	0.0473189	2	2	0.84232	EhG14369	gmst	complete	NA	NA		none	other localisation	OG0023747	Gephyrocapsa	Coccolithophore specific in 2/6 species
EhG8964.1	NA	NA	-0.646368	0.000584557	3	3	0.638887	EhG14421	gmst	complete	NA	amino acid	194037	none	signal peptide	OG0002994	Haptophyta	NA
EhG909.1	NA	NA	-0.980831	0.000231499	3	3	0.506688	EhG33983	getorf	complete	NA	inorganic anion exchanger activity		none	other localisation	OG0000138	Archaeplastida	NA
EhG9207.8	NA	NA	-0.180044	0.0127388	3	3	0.882676	EhG26540	gmst	complete	CPSase_L_D2|PF02786.17|6.7e-51,Biotin_lipoyl|PF00364.22|4.6e-07,ATP-grasp|PF02222.22|0.00036,ATP-grasp_3|PF02655.14|0.00017,Biotin_carb_C|PF02785.19|1.8e-18,Biotin_carb_N|PF00289.22|2.3e-29,Carboxyl_trans|PF01039.22|2.4e-143,ACC_central|PF08326.12|4e-67	acetyl-CoA carboxylase	8696386964	none	other localisation	OG0000203	Archaeplastida	NA
EhG93.1	NA	NA	-0.181985	0.02827	3	3	0.881489	EhG29829	gmst	complete	Aconitase|PF00330.20|7.1e-154,Aconitase_C|PF00694.19|8.4e-32	3-isopropylmalate dehydratase activity		none	other localisation	OG0001445	Archaeplastida	NA
EhG9371.1	NA	NA	-0.210455	0.014652	3	3	0.864265	NA	gmst	complete	Cpn60_TCP1|PF00118.24|5.8e-161	unfolded protein binding	402862351392	none	other localisation	OG0003250	Archaeplastida	NA
EhG940.1	NA	NA	-0.52721	0.00615338	3	3	0.693895	EhG34012	gmst	complete	MttA_Hcf106|PF02416.16|3e-05	NA	99965	none	signal peptide	OG0005861	Archaeplastida	NA
EhG9422.2	NA	NA	-0.275088	0.0305068	3	3	0.8264	EhG32242	gmst	complete	Cation_ATPase_N|PF00690.26|6.5e-06,E1-E2_ATPase|PF00122.20|4.2e-16,Hydrolase|PF00702.26|1.1e-05,HMG_box_2|PF09011.10|0.00091	calcium-transporting ATPase activity		none	signal anchor	OG0000352	Archaeplastida	NA
EhG9453.1	NA	NA	-0.448563	0.00849029	3	3	0.732772	EhG32273	transdec	complete	Lycopene_cycl|PF05834.12|3.9e-66,Pyr_redox_2|PF07992.14|1.1e-05	tetraterpenoid biosynthetic process		none	other localisation	OG0003792	Archaeplastida	NA
EhG9529.10	NA	NA	-1.00092	5.46669e-05	3	3	0.49968	EhG27159	gmst	complete	HCO3_cotransp|PF00955.21|5.5e-62,HCO3_cotransp|PF00955.21|2.7e-65	inorganic anion exchanger activity		none	other localisation	OG0000138	Archaeplastida	NA
EhG9579.2	NA	NA	-0.426974	0.000668219	3	3	0.74382	EhG27212	gmst	5primepartial	2-oxoacid_dh|PF00198.23|4e-65	dihydrolipoyllysine-residue acetyltransferase activity		none	other localisation	OG0004696	Archaeplastida	NA
EhG9657.6	NA	NA	-0.361016	0.00107616	3	3	0.778616	EhG41873	gmst	complete	Mito_carr|PF00153.27|9.2e-24,Mito_carr|PF00153.27|1.5e-19,Mito_carr|PF00153.27|7.8e-18	ATP:ADP antiporter activity		none	other localisation	OG0000883	Archaeplastida	NA
EhG9696.1	NA	NA	-0.31614	0.00164736	3	3	0.803216	EhG8045	getorf	complete	NA	cytoplasmic translation	2.82939e+97	none	other localisation	OG0001909	Archaeplastida	NA
EhG9778.3	NA	NA	-0.378428	0.0013605	3	3	0.769275	EhG8131	getorf	complete	NA	retrograde vesicle-mediated transport, Golgi to ER	8.90913e+16	none	other localisation	OG0002454	Archaeplastida	NA
EhG9779.1	NA	NA	-0.289362	0.0266036	3	3	0.818264	EhG8133	gmst	complete	Aminotran_3|PF00202.21|8.3e-86	ethanolamine-phosphate phospho-lyase activity	124186	none	mitochondrion	OG0002382	Archaeplastida	NA
chloro|NC_007288.1_prot_YP_277310.1_2	NA	NA	-0.383914	0.00143991	3	3	0.766356	NA	NA	NA	NA	NA	NA	NA	NA	NA	E_huxleyi	NA
chloro|NC_007288.1_prot_YP_277313.1_5	NA	NA	-0.232415	0.00337166	3	3	0.851209	NA	NA	NA	NA	NA	NA	NA	NA	NA	E_huxleyi	NA
chloro|NC_007288.1_prot_YP_277315.1_7	NA	NA	-0.370663	0.00290665	3	3	0.773427	NA	NA	NA	NA	NA	NA	NA	NA	NA	E_huxleyi	NA
chloro|NC_007288.1_prot_YP_277319.1_11	NA	NA	-0.164794	0.0313697	3	3	0.892056	NA	NA	NA	NA	NA	NA	NA	NA	NA	E_huxleyi	NA
chloro|NC_007288.1_prot_YP_277322.1_14	NA	NA	-0.417052	0.00105817	3	3	0.748953	NA	NA	NA	NA	NA	NA	NA	NA	NA	E_huxleyi	NA
chloro|NC_007288.1_prot_YP_277328.1_20	NA	NA	-0.362399	0.016738	3	3	0.77787	NA	NA	NA	NA	NA	NA	NA	NA	NA	E_huxleyi	NA
chloro|NC_007288.1_prot_YP_277338.1_30	NA	NA	-0.511718	0.00632474	3	3	0.701387	NA	NA	NA	NA	NA	NA	NA	NA	NA	E_huxleyi	NA
chloro|NC_007288.1_prot_YP_277339.1_31	NA	NA	-0.398754	0.000606721	3	3	0.758513	NA	NA	NA	NA	NA	NA	NA	NA	NA	E_huxleyi	NA
chloro|NC_007288.1_prot_YP_277342.1_34	NA	NA	-0.205382	0.00521973	3	3	0.867309	NA	NA	NA	NA	NA	NA	NA	NA	NA	E_huxleyi	NA
chloro|NC_007288.1_prot_YP_277345.1_37	NA	NA	-0.456019	0.000272681	3	3	0.728995	NA	NA	NA	NA	NA	NA	NA	NA	NA	E_huxleyi	NA
chloro|NC_007288.1_prot_YP_277360.1_52	NA	NA	-0.179068	0.024985	3	3	0.883273	NA	NA	NA	NA	NA	NA	NA	NA	NA	E_huxleyi	NA
chloro|NC_007288.1_prot_YP_277361.1_53	NA	NA	-0.287924	0.0222346	3	3	0.81908	NA	NA	NA	NA	NA	NA	NA	NA	NA	E_huxleyi	NA
chloro|NC_007288.1_prot_YP_277363.1_55	NA	NA	-0.255884	0.00580951	3	3	0.837474	NA	NA	NA	NA	NA	NA	NA	NA	NA	E_huxleyi	NA
chloro|NC_007288.1_prot_YP_277364.1_56	NA	NA	-0.14763	0.0268245	3	3	0.902732	NA	NA	NA	NA	NA	NA	NA	NA	NA	E_huxleyi	NA
chloro|NC_007288.1_prot_YP_277365.2_57	NA	NA	-1.07012	0.000288172	2	2	0.47628	NA	NA	NA	NA	NA	NA	NA	NA	NA	E_huxleyi	NA
chloro|NC_007288.1_prot_YP_277367.1_59	NA	NA	-0.749937	6.78914e-05	3	3	0.594629	NA	NA	NA	NA	NA	NA	NA	NA	NA	E_huxleyi	NA
chloro|NC_007288.1_prot_YP_277368.1_60	NA	NA	-0.483871	0.000584557	3	3	0.715057	NA	NA	NA	NA	NA	NA	NA	NA	NA	E_huxleyi	NA
chloro|NC_007288.1_prot_YP_277369.1_61	NA	NA	-0.615268	0.000699798	3	3	0.652809	NA	NA	NA	NA	NA	NA	NA	NA	NA	E_huxleyi	NA
chloro|NC_007288.1_prot_YP_277370.1_62	NA	NA	-0.558735	0.000157244	3	3	0.678897	NA	NA	NA	NA	NA	NA	NA	NA	NA	E_huxleyi	NA
chloro|NC_007288.1_prot_YP_277371.1_63	NA	NA	-0.272778	0.00378933	3	3	0.827724	NA	NA	NA	NA	NA	NA	NA	NA	NA	E_huxleyi	NA
chloro|NC_007288.1_prot_YP_277372.1_64	NA	NA	-0.527852	0.00423199	3	3	0.693587	NA	NA	NA	NA	NA	NA	NA	NA	NA	E_huxleyi	NA
chloro|NC_007288.1_prot_YP_277374.1_66	NA	NA	-0.353842	0.00102682	3	3	0.782497	NA	NA	NA	NA	NA	NA	NA	NA	NA	E_huxleyi	NA
chloro|NC_007288.1_prot_YP_277376.1_68	NA	NA	-0.430464	0.000543431	3	3	0.742023	NA	NA	NA	NA	NA	NA	NA	NA	NA	E_huxleyi	NA
chloro|NC_007288.1_prot_YP_277378.1_70	NA	NA	-0.186955	0.0138299	3	3	0.878458	NA	NA	NA	NA	NA	NA	NA	NA	NA	E_huxleyi	NA
chloro|NC_007288.1_prot_YP_277379.1_71	NA	NA	-0.273573	0.0033457	3	3	0.827268	NA	NA	NA	NA	NA	NA	NA	NA	NA	E_huxleyi	NA
chloro|NC_007288.1_prot_YP_277387.1_79	NA	NA	-0.34545	0.00919381	3	3	0.787063	NA	NA	NA	NA	NA	NA	NA	NA	NA	E_huxleyi	NA
chloro|NC_007288.1_prot_YP_277401.1_93	NA	NA	-0.31889	0.00107616	3	3	0.801686	NA	NA	NA	NA	NA	NA	NA	NA	NA	E_huxleyi	NA
chloro|NC_007288.1_prot_YP_277403.1_95	NA	NA	-0.188161	0.0130231	3	3	0.877724	NA	NA	NA	NA	NA	NA	NA	NA	NA	E_huxleyi	NA
chloro|NC_007288.1_prot_YP_277405.1_97	NA	NA	-0.221309	0.00692229	3	3	0.857787	NA	NA	NA	NA	NA	NA	NA	NA	NA	E_huxleyi	NA
chloro|NC_007288.1_prot_YP_277406.1_98	NA	NA	-0.230303	0.00546461	3	3	0.852456	NA	NA	NA	NA	NA	NA	NA	NA	NA	E_huxleyi	NA
chloro|NC_007288.1_prot_YP_277408.1_100	NA	NA	-0.222874	0.0156831	3	3	0.856857	NA	NA	NA	NA	NA	NA	NA	NA	NA	E_huxleyi	NA
chloro|NC_007288.1_prot_YP_277410.1_102	NA	NA	-0.537585	0.000543431	3	3	0.688923	NA	NA	NA	NA	NA	NA	NA	NA	NA	E_huxleyi	NA
chloro|NC_007288.1_prot_YP_277411.1_103	NA	NA	-0.406689	0.0156831	3	3	0.754352	NA	NA	NA	NA	NA	NA	NA	NA	NA	E_huxleyi	NA
chloro|NC_007288.1_prot_YP_277412.1_104	NA	NA	-0.14083	0.0204	3	3	0.906997	NA	NA	NA	NA	NA	NA	NA	NA	NA	E_huxleyi	NA
chloro|NC_007288.1_prot_YP_277414.1_106	NA	NA	-0.149758	0.040487	3	3	0.901401	NA	NA	NA	NA	NA	NA	NA	NA	NA	E_huxleyi	NA
chloro|NC_007288.1_prot_YP_277415.1_107	NA	NA	-0.455623	0.000299603	3	3	0.729195	NA	NA	NA	NA	NA	NA	NA	NA	NA	E_huxleyi	NA
chloro|NC_007288.1_prot_YP_277421.1_113	NA	NA	-0.262664	0.00456284	3	3	0.833548	NA	NA	NA	NA	NA	NA	NA	NA	NA	E_huxleyi	NA
chloro|NC_007288.1_prot_YP_277424.1_116	NA	NA	-0.216272	0.00425775	3	3	0.860787	NA	NA	NA	NA	NA	NA	NA	NA	NA	E_huxleyi	NA
chloro|NC_007288.1_prot_YP_277425.1_117	NA	NA	-0.27317	0.00687378	3	3	0.827499	NA	NA	NA	NA	NA	NA	NA	NA	NA	E_huxleyi	NA
chloro|NC_007288.1_prot_YP_277426.1_118	NA	NA	-0.309575	0.00133515	3	3	0.806879	NA	NA	NA	NA	NA	NA	NA	NA	NA	E_huxleyi	NA
con|AT1G67090|RbcS1A	NA	NA	-0.599542	0.00329299	2	2	0.659963	NA	NA	NA	NA	NA	NA	NA	NA	NA	E_huxleyi	NA
con|ATCG00490|RbcL	NA	NA	-0.961526	0.0358255	2	2	0.513514	NA	NA	NA	NA	NA	NA	NA	NA	NA	E_huxleyi	NA
mit|NC_005332.1_prot_NP_957722.1_2	NA	NA	-0.271397	0.00220839	3	3	0.828517	NA	NA	NA	NA	NA	NA	NA	NA	NA	E_huxleyi	NA
mit|NC_005332.1_prot_NP_957731.1_11	NA	NA	-0.212552	0.00689858	3	3	0.863009	NA	NA	NA	NA	NA	NA	NA	NA	NA	E_huxleyi	NA
mit|NC_005332.1_prot_NP_957734.1_14	NA	NA	-0.219168	0.0206872	3	3	0.859061	NA	NA	NA	NA	NA	NA	NA	NA	NA	E_huxleyi	NA

## Sheet: Light vs Dark
ID	logFC	adj.P.Val	Number of replicates ZT6	Number of replicates ZT18	Fold change	Locus	Pfam terms	EggNog text	Identical Emihu1 proteins	Emihu1 annotation	localization	orthogroup	OG age	OG notes
Br18020.t1	0.35436	0.0330959	3	3	1.27842	NA	None	ATP binding		none	signal peptide	OG0000029	Archaeplastida	NA
Br29130.t1	0.469269	0.00815695	3	3	1.38441	NA	None	oxidation-reduction process		none	signal peptide	OG0000844	Archaeplastida	NA
Br29363.t1	0.339636	0.0306727	3	3	1.26544	NA	None	Small ubiquitinrelated modifier		none	other localisation	OG0000636	Archaeplastida	NA
Br31871.t1	-0.513567	0.00443509	3	3	0.700488	NA	None	dihydrokaempferol 4-reductase activity		none	other localisation	OG0000402	Archaeplastida	NA
Br40806.t1	-0.326862	0.0277853	3	3	0.797269	NA	None	phosphopantetheine binding	5.21145e+24	none	other localisation	OG0005712	SAR/Hapista	NA
Br53181.t1	0.198934	0.0373823	3	3	1.14785	NA	None	enoyl-CoA hydratase activity		none	mitochondrion	OG0000513	Archaeplastida	NA
Br56399.t1	0.610313	0.0177756	3	3	1.52659	NA	None	heterochromatin maintenance	121643	none	other localisation	OG0004173	Archaeplastida	NA
Br840.t1	0.41655	0.0468609	2	2	1.33473	NA	None	NA		none	other localisation	OG0001572	Phaocystales	NA
chloro|NC_007288.1_prot_YP_277313.1_5	-0.217628	0.0330504	3	3	0.859978	NA	NA	NA	NA	NA	NA	NA	NA	NA
chloro|NC_007288.1_prot_YP_277365.2_57	-0.40304	0.0270652	2	2	0.756263	NA	NA	NA	NA	NA	NA	NA	NA	NA
chloro|NC_007288.1_prot_YP_277367.1_59	-0.323964	0.0177756	3	3	0.798872	NA	NA	NA	NA	NA	NA	NA	NA	NA
chloro|NC_007288.1_prot_YP_277368.1_60	-0.290485	0.0171007	3	3	0.817627	NA	NA	NA	NA	NA	NA	NA	NA	NA
chloro|NC_007288.1_prot_YP_277370.1_62	-0.221325	0.0294067	3	3	0.857777	NA	NA	NA	NA	NA	NA	NA	NA	NA
chloro|NC_007288.1_prot_YP_277401.1_93	-0.249265	0.0214383	3	3	0.841325	NA	NA	NA	NA	NA	NA	NA	NA	NA
EhG10045.2	0.467176	0.0449472	2	2	1.3824	EhG42546	Mg_chelatase|PF01078.21|5.2e-06,MCM_N|PF14551.6|6.3e-11,MCM_OB|PF17207.3|2.6e-35,MCM|PF00493.23|1.4e-98,AAA_3|PF07726.11|0.00096,MCM_lid|PF17855.1|2.8e-27	DNA replication initiation		none	other localisation	OG0000108	Archaeplastida	NA
EhG10464.21	0.8453	7.67175e-05	3	3	1.79664	EhG31681	Tubulin_C|PF03953.17|9.9e-41,Tubulin|PF00091.25|7.8e-67,Misat_Tub_SegII|PF10644.9|9.2e-05	structural constituent of cytoskeleton	2.09491e+103	none	other localisation	OG0000098	Archaeplastida	NA
EhG10501.1	-0.261898	0.0262978	3	3	0.83399	EhG31659	NA	NA		none	mitochondrion	OG0001721	Phaocystales	NA
EhG11203.2	-0.273123	0.0254875	3	3	0.827526	EhG28137,EhG28138	NA	negative regulation of lipoprotein oxidation	2.12344e+47	none	signal peptide	OG0003721	SAR/Hapista	NA
EhG11276.3	-0.671544	0.000529877	3	3	0.627834	EhG28213	Mito_carr|PF00153.27|2e-17,Mito_carr|PF00153.27|3.6e-17,Mito_carr|PF00153.27|1.8e-18	oxidative phosphorylation uncoupler activity	2.12466e+96	none	other localisation	OG0000143	Archaeplastida	NA
EhG11357.3	-0.26311	0.0473947	3	3	0.83329	EhG34489	NA	2 iron, 2 sulfur cluster binding	4.82985e+19	none	other localisation	OG0001189	Archaeplastida	NA
EhG11745.1	-0.493274	0.0101695	3	3	0.710411	EhG4665	NA	NA		none	signal peptide	OG0020731	Isochrysidales	NA
EhG11949.4	0.202645	0.0325583	3	3	1.15081	EhG12131	Kinase-like|PF14531.6|6.4e-09,Pkinase_Tyr|PF07714.17|1.2e-42,Pkinase|PF00069.25|4.4e-78,UBA_2|PF08587.11|0.00032,KA1|PF02149.19|1.3e-08,AdenylateSensor|PF16579.5|2.8e-09	protein serine/threonine kinase activity	356166356167	none	other localisation	OG0000042	Archaeplastida	NA
EhG12212.4	0.356008	0.0272802	3	3	1.27988	EhG11860	FoP_duplication|PF13865.6|8.6e-06	NA	2.78882e+23	none	other localisation	OG0008230	Phaocystales	NA
EhG12348.2	0.93463	8.65353e-05	3	3	1.9114	EhG28462	NA	2-hydroxyglutarate dehydrogenase activity		none	signal peptide	OG0002312	Archaeplastida	NA
EhG13732.1	-0.333043	0.0307633	3	3	0.79386	EhG17186	NA	NA		none	other localisation	OG0055345	E_huxleyi	Coccolithophore specific in 1/6 species
EhG14046.1	0.661102	0.00485818	3	3	1.58129	EhG38864	Histone|PF00125.24|1.4e-19	protein heterodimerization activity	1.96782e+175	Description:Nucleosome assembly and biogenesis:Megan Sentman:2009-05-17 Model Notes:Slightly shorter than similar sequences:Megan Sentman:2009-05-17 Defline:putative Histone H2B:Megan Sentman:2009-05-17 EST evidence:No:Megan Sentman:2009-05-17	other localisation	OG0000429	Archaeplastida	NA
EhG14067.1	0.398436	0.00511059	3	3	1.31808	EhG38844	PEP_mutase|PF13714.6|6.5e-12,ICL|PF00463.21|5.5e-198	isocitrate lyase activity	4.15467e+62	none	other localisation	OG0002409	Archaeplastida	NA
EhG1435.4	-0.202404	0.0486013	3	3	0.869101	EhG15769	Shikimate_DH|PF01488.20|7e-32,GlutR_dimer|PF00745.20|1.2e-24,GlutR_N|PF05201.15|4.9e-39	glutamyl-tRNA reductase activity		none	chloroplast	OG0001756	Archaeplastida	NA
EhG14561.1	-0.361919	0.0235327	3	3	0.778129	EhG27515	Metallophos|PF00149.28|1.8e-08	NA		none	other localisation	OG0001286	Archaeplastida	NA
EhG15131.1	-0.735698	0.0187872	2	2	0.600527	EhG16383	FA_desaturase|PF00487.24|4.1e-05,FA_desaturase|PF00487.24|1e-10	oxidoreductase activity, acting on paired donors, with oxidation of a pair of donors resulting in the reduction of molecular oxygen to two molecules of water	366826	none	other localisation	OG0000538	Archaeplastida	NA
EhG15780.28	-0.200478	0.0459794	3	3	0.870262	EhG43309	NA	methylenetetrahydrofolate reductase (NAD(P)H) activity	2.79591e+98	none	other localisation	OG0000749	Archaeplastida	NA
EhG15961.1	-0.295412	0.0325583	3	3	0.81484	EhG23507,EhG23508	TauD|PF02668.16|1.2e-24	Taurine catabolism dioxygenase TauD, TfdA family	2.77705e+46	none	signal peptide	OG0001220	Archaeplastida	NA
EhG16065.1	0.416865	0.0064527	3	3	1.33502	EhG33671	Aldedh|PF00171.22|9.7e-77	oxidoreductase activity, acting on the aldehyde or oxo group of donors, NAD or NADP as acceptor		none	other localisation	OG0000988	Archaeplastida	NA
EhG1631.5	-0.373299	0.00918239	3	3	0.772015	EhG15708	DAO|PF01266.24|4.1e-37,DAO_C|PF16901.5|1.4e-37,FAD_binding_2|PF00890.24|1.3e-07,Pyr_redox_2|PF07992.14|0.00081	sn-glycerol-3-phosphate:ubiquinone-8 oxidoreductase activity		none	other localisation	OG0001171	Archaeplastida	NA
EhG16904.1	0.586156	0.00485818	3	3	1.50124	EhG22351	PEPCK_ATP|PF01293.20|1.5e-200	phosphoenolpyruvate carboxykinase (ATP) activity	8.77999e+101	none	other localisation	OG0001270	Archaeplastida	NA
EhG17198.1	-0.333009	0.0177813	3	3	0.793879	EhG13742	NA	NA	2.08477e+47	none	signal peptide	OG0009872	Archaeplastida	NA
EhG17305.4	0.479015	0.0105398	3	3	1.39379	EhG38303,EhG38304	NA	Periplasmic binding protein	208302	none	other localisation	OG0000213	SAR/Hapista	NA
EhG17612.6	-0.333637	0.0351336	3	3	0.793533	EhG6894	NA	Chlorophyll A-B binding protein	2.16458e+80	none	other localisation	OG0000105	Archaeplastida	NA
EhG17864.1	0.913506	7.67175e-05	3	3	1.88362	EhG12471,EhG32310	Tubulin|PF00091.25|3.8e-65,Tubulin_C|PF03953.17|2.4e-46	structural constituent of cytoskeleton		none	other localisation	OG0000102	Archaeplastida	NA
EhG18143.1	-0.357536	0.00485818	3	3	0.780497	EhG39566	NA	NA	2.07361e+17	none	signal peptide	OG0010968	Phaocystales	NA
EhG18289.1	0.497391	0.0184575	3	3	1.41166	EhG44114	Thymidylat_synt|PF00303.19|1.3e-110,DHFR_1|PF00186.19|1.7e-27	thymidylate synthase activity		none	other localisation	OG0002084	Archaeplastida	NA
EhG19563.2	-0.438879	0.0326872	3	3	0.737707	EhG20048	NA	NA		none	other localisation	OG0000200	SAR/Hapista	NA
EhG19601.4	-0.31087	0.0142628	3	3	0.806156	EhG20009	FAD_binding_3|PF01494.19|1.2e-19	FAD binding		none	signal peptide	OG0000549	Archaeplastida	NA
EhG19738.1	0.384553	0.0262978	3	3	1.30546	EhG21921	5_3_exonuc|PF01367.20|9.1e-06,XPG_I|PF00867.18|1.2e-24,XPG_N|PF00752.17|1.5e-32	endonuclease activity		none	other localisation	OG0001536	Archaeplastida	NA
EhG19863.1	1.07077	0.00595944	2	2	2.10056	EhG2604	PRA-PH|PF01503.17|1.2e-20	Phosphoribosyl-ATP pyrophosphohydrolase		none	other localisation	OG0011732	SAR/Hapista	NA
EhG1991.1	-0.229031	0.0390346	3	3	0.853208	EhG18794	Cyt-b5|PF00173.28|2.2e-23,Oxidored_molyb|PF00174.19|8e-59,NAD_binding_1|PF00175.21|3.5e-24,Mo-co_dimer|PF03404.16|1.8e-45,FAD_binding_6|PF00970.24|3e-25	nitrate reductase		none	other localisation	OG0002252	Archaeplastida	NA
EhG20009.1	-0.35068	0.00800411	3	3	0.784214	EhG19601	FAD_binding_3|PF01494.19|1.6e-19	FAD binding		none	signal peptide	OG0000549	Archaeplastida	NA
EhG20257.1	-0.242407	0.031681	3	3	0.845334	EhG4793,EhG4809	Transket_pyr|PF02779.24|6.4e-39,E1_dh|PF00676.20|2.9e-07,Transketolase_C|PF02780.20|0.00056,Transketolase_N|PF00456.21|4.9e-108	transketolase activity	8.82039e+67	none	signal peptide	OG0000535	Archaeplastida	NA
EhG20325.2	0.193461	0.0449472	3	3	1.1435	EhG33633	TPR_1|PF00515.28|8.1e-06,STI1|PF17830.1|3.7e-13,HipN|PF18253.1|5.4e-17	Hsp70 protein binding		none	other localisation	OG0001928	Archaeplastida	NA
EhG20457.1	-0.301621	0.0367715	3	3	0.81134	EhG34212	NA	EF-hand domain pair		none	other localisation	OG0002940	Archaeplastida	NA
EhG20585.1	-0.328006	0.0317717	3	3	0.796637	EhG38104	TauE|PF01925.19|2.3e-13,TauE|PF01925.19|4.4e-08	Sulfite exporter TauE/SafE	4.08044e+17	none	signal anchor	OG0000236	Archaeplastida	NA
EhG20614.2	-0.192473	0.0398028	3	3	0.875104	EhG38127	Mito_carr|PF00153.27|1.1e-20,Mito_carr|PF00153.27|6.9e-13,Mito_carr|PF00153.27|2e-21	oxidative phosphorylation uncoupler activity		none	other localisation	OG0000143	Archaeplastida	NA
EhG21010.1	0.259052	0.0434814	3	3	1.19669	EhG30715	NA	NA	365562314615	none	other localisation	OG0004401	Calcihaptophyta	NA
EhG21307.1	0.748964	0.0169278	2	2	1.68059	EhG10196	NA	NA		none	other localisation	OG0082689	NA	NA
EhG21485.2	0.690738	0.00485818	3	3	1.61411	EhG13875	NA	thiosulfate transmembrane transporter activity		none	other localisation	OG0001181	Archaeplastida	NA
EhG21498.2	1.61491	8.65353e-05	3	3	3.06293	EhG13861	NA	NA		none	chloroplast	OG0017045	Prymnesiales	NA
EhG21785.1	0.399285	0.0187872	3	3	1.31885	EhG43883	PDZ_2|PF13180.6|0.00019,PDZ_6|PF17820.1|5e-08,PDZ|PF00595.24|1.5e-06	NA		none	other localisation	OG0006228	Archaeplastida	NA
EhG21874.7	0.217808	0.0317717	3	3	1.16297	NA	CPSase_L_D2|PF02786.17|5.5e-80,ATP-grasp|PF02222.22|7.2e-08,ATPgrasp_Ter|PF15632.6|9.4e-07,Dala_Dala_lig_C|PF07478.13|0.00079,GATase|PF00117.28|6.9e-43,CPSase_L_D3|PF02787.19|4.4e-35,MGS|PF02142.22|1.4e-11,ATP-grasp|PF02222.22|0.00019,Dala_Dala_lig_C|PF07478.13|0.00099,CPSase_sm_chain|PF00988.22|2.2e-50,ATPgrasp_Ter|PF15632.6|0.00023,CPSase_L_D2|PF02786.17|2.2e-22	carbamoyl-phosphate synthase (glutamine-hydrolyzing) activity		none	other localisation	OG0000379	Archaeplastida	NA
EhG22019.3	0.285372	0.0458801	3	3	1.21872	EhG8443	ThiG|PF05690.14|6.2e-07,SOR_SNZ|PF01680.17|7.5e-110	pyridoxal 5'-phosphate synthase (glutamine hydrolysing) activity	4.67076e+66	none	other localisation	OG0002326	Archaeplastida	NA
EhG22093.1	-0.238329	0.0326872	3	3	0.847727	EhG8519	NA	UMP salvage	2.75754e+41	none	signal peptide	OG0001615	Archaeplastida	NA
EhG2265.1	0.552895	0.0294242	2	2	1.46703	EhG13380	Epimerase|PF01370.21|1.5e-07,NAD_binding_10|PF13460.6|1.2e-06,3Beta_HSD|PF01073.19|1.1e-06,RmlD_sub_bind|PF04321.17|5.6e-08	NADH dehydrogenase ubiquinone 1 alpha subcomplex subunit 9	2.79933e+63	none	other localisation	OG0003172	Archaeplastida	NA
EhG2273.2	-0.320118	0.0161795	3	3	0.801004	EhG13373	Chloroa_b-bind|PF00504.21|1.6e-36	Chlorophyll A-B binding protein	2.1734e+17	Name:Lhcf73:Stephane Lefebvre:2010-08-31 Description:Light harvesting chlorophyll a/c binding protein. Part of LI818 & LI818-like group.:Stephane Lefebvre:2010-08-31 Model Notes:No issues:Stephane Lefebvre:2010-08-31 Defline:Light harvesting protein:Stephane Lefebvre:2010-08-31 Disposition:Catalog:Stephane Lefebvre:2010-08-31 EST evidence:No:Stephane Lefebvre:2010-08-31	signal peptide	OG0000105	Archaeplastida	NA
EhG22905.4	-0.327871	0.0294067	3	3	0.796711	EhG5758	Rieske_2|PF13806.6|0.00084	Rieske-like [2Fe-2S] domain		none	signal peptide	OG0006178	Archaeplastida	NA
EhG22910.1	-0.393903	0.0317717	3	3	0.761068	EhG5763	Chloroa_b-bind|PF00504.21|1.3e-31	Chlorophyll A-B binding protein	203047224646	Name:Lhcf45:Stephane Lefebvre:2008-12-04 Name:Lhcf45_1:Stephane Lefebvre:2012-05-18 Description:Light harvesting chlorophyll a/c binding protein. Part of Lhcz & Lhcz-like group. Chloroplast localised.:Stephane Lefebvre:2008-12-04 Model Notes:No issues:Stephane Lefebvre:2008-12-04 Defline:Light harvesting protein:Stephane Lefebvre:2008-12-04 Disposition:Catalog:Stephane Lefebvre:2008-12-04 EST evi…	mitochondrion	OG0000018	Archaeplastida	NA
EhG23651.1	0.818238	0.000402638	3	3	1.76325	EhG12098	NA	NA		none	other localisation	OG0007289	Prymnesiales	NA
EhG23660.1	0.731251	0.00918239	3	3	1.66008	EhG12090	Spindle_Spc25|PF08234.12|1.1e-17	Chromosome segregation protein Spc25		none	other localisation	OG0003753	Archaeplastida	NA
EhG23702.91	-0.206038	0.0330504	3	3	0.866915	EhG12051,EhG12052	F_bP_aldolase|PF01116.20|1.4e-86	fructose-bisphosphate aldolase activity	8.77119e+39	none	other localisation	OG0000389	Archaeplastida	NA
EhG23862.1	-0.379146	0.0330959	3	3	0.768892	EhG18554	AAA_21|PF13304.6|2e-08,ABC_tran|PF00005.27|2.7e-17,ABC_tran|PF00005.27|5.1e-14,AAA_21|PF13304.6|0.00073	ATPase activity		none	other localisation	OG0001587	Archaeplastida	NA
EhG23908.1	0.385699	0.0219736	3	3	1.30649	EhG18599	FTCD_C|PF04961.12|5e-28	Formiminotransferase-cyclodeaminase		none	other localisation	OG0007295	Archaeplastida	NA
EhG24012.1	-0.22428	0.0495388	3	3	0.856022	EhG11566	Fea1|PF07692.11|2.2e-10,Fea1|PF07692.11|4.1e-12,Fea1|PF07692.11|1.4e-09	NA		none	signal peptide	OG0000262	Archaeplastida	NA
EhG24259.1	0.516796	0.0266723	3	3	1.43077	NA	Histone|PF00125.24|4.5e-13,CBFD_NFYB_HMF|PF00808.23|3.6e-05,Histone_H2A_C|PF16211.5|8.8e-20	Histone H2A	1.95431e+106	Description:Nucleosome assembly and DNA binding:Megan Sentman:2009-05-17 Defline:putative Histone H2A:Megan Sentman:2009-05-17 EST evidence:No:Megan Sentman:2009-05-17	other localisation	OG0000214	Archaeplastida	NA
EhG24270.1	0.422458	0.0142628	3	3	1.34021	EhG24275,EhG24289,EhG43154	TAF|PF02969.17|0.00023,CENP-S|PF15630.6|0.00014,Histone|PF00125.24|0.00086,CENP-T_C|PF15511.6|1.4e-08	protein heterodimerization activity	195417,195533,218631,221741,246130,48986,48989,49006,49007,49012,49031,49046,49133,49139,49148,49163,49169,49170,49177,50190,50320,50345,50586,50605,59744,59748,59755,59759,59775,59779,59783,60587,61289,61300,61321,61345,61375,61397,61408,61428,61450,63067,63112,63175,68561,68592,68597,69350,69380,69403,76349,76350,76353,76791,76793,76795,78584,78585,78586,95556,95561,95617,98551,106615,108043,34…	Description:Chromosome organization and biogenesis:Megan Sentman:2009-05-17 Model Notes:1 variant at position 61:Megan Sentman:2009-05-17 Defline:Putative Histone H4:Megan Sentman:2009-05-17 EST evidence:Yes:Megan Sentman:2009-05-17	other localisation	OG0000374	Archaeplastida	NA
EhG25586.1	-0.220807	0.0481914	3	3	0.858085	EhG30459	Ribosomal_L12_N|PF16320.5|6.6e-10,Ribosomal_L12|PF00542.19|1.3e-24	structural constituent of ribosome	4.73925e+98	none	signal peptide	OG0000793	Archaeplastida	NA
EhG25844.24	0.359876	0.00837375	3	3	1.28332	EhG36685	AAA|PF00004.29|2.6e-17	NA	2.57517e+22	none	other localisation	OG0002274	Archaeplastida	NA
EhG26278.8	0.962711	7.67175e-05	3	3	1.94897	EhG13227	ABC_tran|PF00005.27|4e-19,AAA_21|PF13304.6|4.9e-05,ABC_tran|PF00005.27|1.7e-13,AAA_21|PF13304.6|0.00063	protein kinase regulator activity		none	other localisation	OG0000206	Archaeplastida	NA
EhG26984.1	-1.69994	8.65353e-05	3	3	0.307799	EhG21385,EhG26601,EhG44414	NA	photosynthesis	2.272e+23	none	mitochondrion	OG0000185	SAR/Hapista	NA
EhG27040.2	0.193222	0.0474906	3	3	1.14331	EhG7854	Cpn60_TCP1|PF00118.24|1.7e-127	unfolded protein binding		none	other localisation	OG0002771	Archaeplastida	NA
EhG27313.6	-0.931701	0.000125632	3	3	0.52424	EhG29479	ABC_tran|PF00005.27|9.7e-18,ABC_tran|PF00005.27|2.6e-21	protein kinase regulator activity	8.79559e+44	none	other localisation	OG0000206	Archaeplastida	NA
EhG27696.1	-0.534831	0.00166128	3	3	0.69024	NA	Aldedh|PF00171.22|5.1e-86	aldehyde dehydrogenase (NAD) activity		none	other localisation	OG0003409	Archaeplastida	NA
EhG27854.1	0.274026	0.0140496	3	3	1.20918	EhG21154	Acyl-CoA_dh_2|PF08028.11|6.9e-09,Acyl-CoA_dh_N|PF02771.16|4.5e-34,Acyl-CoA_dh_M|PF02770.19|9.2e-27,Acyl-CoA_dh_1|PF00441.24|2e-38	isovaleryl-CoA dehydrogenase activity	360280360281	Defline:Long-chain specific acyl-CoA dehydrogenase:Mark van der Giezen:2009-09-10	mitochondrion	OG0000166	Archaeplastida	NA
EhG28153.3	-0.617451	0.00492725	3	3	0.651822	EhG11219	NA	NA	4.05876e+23	none	signal peptide	OG0000200	SAR/Hapista	NA
EhG28191.2	-0.213064	0.0291226	3	3	0.862703	EhG11256	NA	N2-acetyl-L-ornithine:2-oxoglutarate 5-aminotransferase activity	2.51666e+134	none	signal peptide	OG0001847	Archaeplastida	NA
EhG28756.1	0.218535	0.0330504	3	3	1.16355	EhG7104	PK|PF00224.21|1.3e-153,PK|PF00224.21|8e-154,PK_C|PF02887.16|1.8e-24,PK_C|PF02887.16|1.9e-09	pyruvate kinase activity		none	other localisation	OG0000192	Archaeplastida	NA
EhG29006.1	0.286106	0.0321603	3	3	1.21934	EhG3083	FMN_dh|PF01070.18|5.5e-06,CBS|PF00571.28|2.7e-10,NMO|PF03060.15|9e-09,IMPDH|PF00478.25|2.8e-131	IMP dehydrogenase activity		none	other localisation	OG0001166	Archaeplastida	NA
EhG29046.1	0.5535	0.0199622	3	3	1.46764	EhG5545	MCM_OB|PF17207.3|4.5e-38,MCM_N|PF14551.6|3.8e-14,AAA_5|PF07728.14|3.5e-07,MCM|PF00493.23|1.6e-99,AAA_3|PF07726.11|0.00027,MCM_lid|PF17855.1|6e-26,Mg_chelatase|PF01078.21|6.9e-05	DNA replication initiation	121588	none	other localisation	OG0000108	Archaeplastida	NA
EhG29481.1	1.10158	5.7322e-05	3	3	2.1459	EhG27315	ATP-cone|PF03477.16|4.5e-19,Ribonuc_red_lgN|PF00317.21|6.1e-24,Ribonuc_red_lgC|PF02867.15|3.1e-184	Provides the precursors necessary for DNA synthesis. Catalyzes the biosynthesis of deoxyribonucleotides from the corresponding ribonucleotides		none	other localisation	OG0000795	Archaeplastida	NA
EhG30590.1	-0.375544	0.0263364	3	3	0.770814	EhG18707	NA	NA		none	signal peptide	OG0007000	Haptophyta	NA
EhG30968.109	-0.360664	0.00511059	3	3	0.778806	EhG2759	DUF3479|PF11965.8|1.1e-48,CobN-Mg_chel|PF02514.16|0	ligase activity, forming nitrogen-metal bonds	2.7665e+107	none	other localisation	OG0000514	Archaeplastida	NA
EhG31105.14	-0.35301	0.0330504	3	3	0.782949	EhG3291	CA_like|PF10563.9|2.4e-50,CDCA|PF18484.1|7.6e-13	Cadmium carbonic anhydrase repeat		none	other localisation	OG0001141	Archaeplastida	NA
EhG31109.3	-0.369947	0.00485818	3	3	0.773811	EhG3295	LCIB_C_CA|PF18599.1|2.6e-62	NA		none	other localisation	OG0001053	Archaeplastida	NA
EhG31937.1	0.338931	0.0108328	3	3	1.26482	EhG1079	Pribosyltran|PF00156.27|4.5e-13	'de novo' UMP biosynthetic process		none	other localisation	OG0006800	Archaeplastida	NA
EhG32718.1	0.341232	0.0325583	3	3	1.26684	EhG6690	NA	chromosome passenger complex localization to kinetochore	253074	none	other localisation	OG0005181	Archaeplastida	NA
EhG3274.2	0.247055	0.0249917	3	3	1.18678	EhG31170	3HCDH|PF00725.22|4.8e-05,ECH_1|PF00378.20|9.8e-39,3HCDH_N|PF02737.18|1.2e-52,ECH_2|PF16113.5|1.4e-26,3HCDH|PF00725.22|2.4e-19	enoyl-CoA hydratase activity	4.05053e+35	none	mitochondrion	OG0000513	Archaeplastida	NA
EhG3291.12	-0.260941	0.0364388	3	3	0.834543	EhG31105	CDCA|PF18484.1|7.6e-13,CA_like|PF10563.9|2.6e-50	Cadmium carbonic anhydrase repeat		none	other localisation	OG0001141	Archaeplastida	NA
EhG33132.2	0.27329	0.0468609	3	3	1.20856	EhG29934	Ldh_1_N|PF00056.23|2.8e-33,Ldh_1_C|PF02866.18|5.7e-37	L-malate dehydrogenase activity		none	other localisation	OG0001135	Archaeplastida	NA
EhG33398.2	0.479997	0.0425414	2	2	1.39474	EhG32422	NA	mRNA splicing, via spliceosome		none	other localisation	OG0082093	E_huxleyi	Coccolithophore specific in 1/6 species
EhG33475.1	0.199139	0.0499709	3	3	1.14801	EhG44646	FAD_binding_2|PF00890.24|2.1e-113,Succ_DH_flav_C|PF02910.20|1.4e-43,Pyr_redox_2|PF07992.14|0.0002	anaerobic respiration		none	mitochondrion	OG0001338	Archaeplastida	NA
EhG34276.2	-0.256345	0.0263364	3	3	0.837206	EhG311	Rubredoxin|PF00301.20|0.00011	NA		none	signal peptide	OG0004499	Archaeplastida	NA
EhG34408.2	-0.750965	0.0140496	2	2	0.594206	EhG34885	HCO3_cotransp|PF00955.21|4e-69,HCO3_cotransp|PF00955.21|1.1e-61	inorganic anion exchanger activity		none	other localisation	OG0000138	Archaeplastida	NA
EhG35474.1	-0.218727	0.0330504	3	3	0.859324	EhG12823,EhG12824,EhG35476	AdoHcyase_NAD|PF00670.21|4.7e-81,AdoHcyase|PF05221.17|1.8e-137,IlvN|PF07991.12|7.9e-05,2-Hacid_dh_C|PF02826.19|8.3e-08	adenosylhomocysteinase activity	224588,42883,52503,52504,52506,52531,52544,60091,60093,70213,70216,70217,70229,70234,70239,70259,71363,281319,281320,88956,88957,88958,88959,88960,88961,263660,263661,263662,263663,263664,263665,265843,265844,265845,271331,408430,408431,408432,408433,408434,408435,399526,399527,79403,79404,79405,79406,109377,361722,361723,361724,361734,361735,361736,313124,313126	none	other localisation	OG0000846	Archaeplastida	NA
EhG35795.2	0.5971	0.00334243	3	3	1.51267	NA	Tubulin|PF00091.25|6.5e-65,Tubulin_C|PF03953.17|1.3e-45	structural constituent of cytoskeleton		none	other localisation	OG0000102	Archaeplastida	NA
EhG36044.1	0.468795	0.00237379	3	3	1.38395	NA	NA	oxidation-reduction process		none	chloroplast	OG0000844	Archaeplastida	NA
EhG3612.2	0.873763	0.00938541	3	3	1.83244	EhG12641	NA	EF-hand, calcium binding motif		none	other localisation	OG0001276	Archaeplastida	NA
EhG36599.1	-0.384536	0.0107775	3	3	0.766025	EhG37756	NA	NA	1.16581e+17	none	signal peptide	OG0010481	Archaeplastida	NA
EhG36734.1	-0.365058	0.00511059	3	3	0.776438	EhG25800	FBPase|PF00316.20|1.1e-32	fructose 1,6-bisphosphate 1-phosphatase activity	2.52073e+137	none	other localisation	OG0001462	Archaeplastida	NA
EhG37269.7	-0.255648	0.0468609	3	3	0.837611	EhG10592	NA	oxidoreductase activity, acting on diphenols and related substances as donors	4687457722	none	signal peptide	OG0001133	Archaeplastida	NA
EhG37648.1	0.564214	0.00485818	3	3	1.47858	EhG39848,EhG39850	CENP-T_C|PF15511.6|0.00022,CENP-S|PF15630.6|0.00055,PAF|PF15715.5|0.00028,Histone|PF00125.24|4.4e-54	protein heterodimerization activity	195397,195402,218620,218622,221601,229655,231529,231531,237262,239292,240121,249890,256185,48160,48164,48166,48182,48201,48211,48213,48223,48228,48237,49164,49891,50499,58838,58851,58852,58862,58864,58865,58877,58879,58880,58881,59756,60261,60562,61246,61290,61318,61323,61325,61373,61377,61378,68556,68567,68571,68579,68580,68586,68589,68601,69303,69331,69348,69388,71684,71689,71690,71707,72198,72…	Description:nucleosome assembly and DNA binding:Megan Sentman:2009-05-18 Model Notes:1 variant at position 91:Megan Sentman:2009-05-18 Defline:putative Histone H3:Megan Sentman:2009-05-18 EST evidence:Yes:Megan Sentman:2009-05-18	other localisation	OG0000144	Archaeplastida	NA
EhG37739.1	0.368709	0.0142628	3	3	1.2912	EhG5836	Acylphosphatase|PF00708.18|0.00011	NA		none	signal peptide	OG0011783	Phaocystales	NA
EhG38215.43	-0.216472	0.0473947	3	3	0.860668	EhG34866,EhG38687,EhG44284	S-AdoMet_synt_C|PF02773.16|1.3e-59,S-AdoMet_synt_M|PF02772.16|6.3e-07	methionine adenosyltransferase activity		none	other localisation	NA	NA	No Orthogroup
EhG38315.2	0.272042	0.0317717	3	3	1.20752	EhG17298	Peptidase_C1|PF00112.23|7.4e-54	transferase activity, transferring glycosyl groups		none	other localisation	OG0000488	Archaeplastida	NA
EhG39682.2	0.883716	0.0194895	3	3	1.84512	EhG7517	CKS|PF01111.19|5.8e-25	cyclin-dependent protein serine/threonine kinase activator activity	4.96165e+71	Name:CKS:Herve Moreau:2008-08-01 Description:Core cell cycle gene. CDK subunit CKS:Herve Moreau:2008-08-01 Literature:Robbens S.	other localisation	OG0003637	Archaeplastida	NA
EhG40126.15	-0.631817	0.00796923	3	3	0.645363	EhG16133	Na_Ca_ex|PF01699.24|7.8e-24,Na_Ca_ex|PF01699.24|2.4e-22	calcium, potassium:sodium antiporter activity		none	signal anchor	OG0000741	E_huxleyi	Coccolithophore specific in 1/6 species
EhG40687.7	0.386228	0.0326872	3	3	1.30697	EhG12915	Ldh_1_N|PF00056.23|1.5e-33,Ldh_1_C|PF02866.18|2.6e-36	L-malate dehydrogenase activity	27611086558	none	other localisation	OG0001135	Archaeplastida	NA
EhG42504.1	-0.243027	0.0481914	3	3	0.844971	EhG21562	MMR_HSR1|PF01926.23|3.3e-07,GTP_EFTU|PF00009.27|2.8e-49,GTP_EFTU_D2|PF03144.25|0.00016,EFG_C|PF00679.24|4.5e-20	GTPase activity	280605	none	signal peptide	OG0001138	Archaeplastida	NA
EhG4253.7	-1.52424	0.00166128	3	3	0.347664	EhG32360	NA	NA	2.70488e+107	none	signal peptide	OG0000200	SAR/Hapista	NA
EhG43099.1	-0.18701	0.0459794	3	3	0.878424	EhG27964	TIM|PF00121.18|7.5e-88	triosephosphate isomerase	2.18532e+158	Name:TIM:Thomas Mock:2008-07-26 Description:Triosephosphate isomerase (TIM) is a glycolytic enzyme that catalyzes the interconversion of dihydroxyacetone phosphate and D-glyceraldehyde-3-phosphate. The reaction is very efficient and requires neither cofactors nor metal ions. TIM	other localisation	OG0000472	Archaeplastida	NA
EhG43609.1	0.239241	0.0291356	3	3	1.18037	EhG7204	GATase|PF00117.28|6.3e-36,tRNA_Me_trans|PF03054.16|8.9e-06,QueC|PF06508.13|0.00037,Peptidase_C26|PF07722.13|9.4e-15,NAD_synthase|PF02540.17|9.1e-07,GMP_synt_C|PF00958.22|0.00011,GMP_synt_C|PF00958.22|2.7e-13	GMP synthase (glutamine-hydrolyzing) activity		none	other localisation	OG0003000	Archaeplastida	NA
EhG43671.1	-0.275686	0.0142628	3	3	0.826058	NA	NA	NA		none	signal peptide	OG0017027	Prymnesiales	NA
EhG44300.1	0.585085	0.01765	2	2	1.50013	EhG7464	TPT|PF03151.16|3.6e-79,EamA|PF00892.20|7.5e-05	carbohydrate transport		none	signal peptide	OG0000057	Archaeplastida	NA
EhG44537.1	0.493843	0.00334243	3	3	1.40819	EhG43108,EhG43832	Aconitase|PF00330.20|9e-41,Aconitase_B_N|PF11791.8|2.4e-60,Aconitase_2_N|PF06434.13|2.2e-85	Aconitate B N-terminal domain	26577779266	none	other localisation	OG0001937	Archaeplastida	NA
EhG4644.3	0.195939	0.0499513	3	3	1.14547	EhG11720	NA	NA		none	other localisation	OG0014383	Prymnesiales	NA
EhG4984.1	0.65144	0.00485818	3	3	1.57074	NA	PCNA_C|PF02747.15|6.6e-54,PCNA_N|PF00705.18|3.1e-54,Rad9|PF04139.13|1.2e-06	DNA polymerase processivity factor activity		none	other localisation	OG0002438	Archaeplastida	NA
EhG5214.3	-0.543843	0.00511059	3	3	0.685941	EhG4022	NA	NA	2.25399e+47	none	other localisation	OG0000200	SAR/Hapista	NA
EhG5340.1	0.197258	0.0473947	3	3	1.14652	EhG3962	Cpn60_TCP1|PF00118.24|1.5e-152	protein binding involved in protein folding	280895270995	none	other localisation	OG0002522	Archaeplastida	NA
EhG5365.1	-0.608353	0.0277687	3	3	0.655945	EhG3935	NA	Fatty acid desaturase	312352	none	signal peptide	OG0001281	Archaeplastida	NA
EhG5799.3	-0.29974	0.0197447	3	3	0.812399	EhG37696,EhG37700	Chloroa_b-bind|PF00504.21|8.4e-31	Chlorophyll A-B binding protein		none	mitochondrion	OG0000105	Archaeplastida	NA
EhG5923.1	-0.274891	0.0232792	3	3	0.826513	EhG42343	SNO|PF01174.19|1.8e-43,GATase_3|PF07685.14|5.2e-08,ThiG|PF05690.14|1.4e-05,SOR_SNZ|PF01680.17|2.7e-97,GATase|PF00117.28|0.00041	pyridoxal 5'-phosphate synthase (glutamine hydrolysing) activity	8.76793e+22	none	signal peptide	OG0002326	Archaeplastida	NA
EhG6053.1	0.192446	0.0499513	3	3	1.1427	NA	NA	NA		none	other localisation	OG0081615	Gephyrocapsa	Coccolithophore specific in 2/6 species
EhG6178.1	-0.236506	0.0335726	3	3	0.848798	EhG37592	PDZ_6|PF17820.1|0.00052,PDZ|PF00595.24|2.3e-05	NA	2.78911e+35	none	other localisation	OG0007775	Archaeplastida	NA
EhG6187.1	-0.264164	0.0177813	3	3	0.832681	EhG37601	E1_dh|PF00676.20|0.00051,Transket_pyr|PF02779.24|7.6e-40,DXP_synthase_N|PF13292.6|7.6e-107,Transketolase_C|PF02780.20|1.7e-18,TPP_enzyme_C|PF02775.21|6.2e-06	transketolase activity	2.81777e+44	none	signal peptide	OG0003263	Archaeplastida	NA
EhG6327.3	-0.793348	0.000402638	3	3	0.577003	EhG14906	NA	NA		none	mitochondrion	OG0018820	Zygodiscales	NA
EhG6353.1	-0.429241	0.0321603	2	2	0.742652	EhG14887	MMPL|PF03176.15|5.4e-05,Patched|PF02460.18|2.6e-19,MMPL|PF03176.15|2.4e-08,Patched|PF02460.18|1.4e-07,Sterol-sensing|PF12349.8|9.1e-14	patched ligand maturation	371747	none	signal anchor	OG0000365	Archaeplastida	NA
EhG6475.1	-0.522339	0.00166128	3	3	0.696242	EhG617	NA	NA		none	signal peptide	OG0001684	Archaeplastida	NA
EhG697.16	-0.194056	0.0468609	3	3	0.874145	EhG6530	NA	translation elongation factor activity	6.04666e+53	none	signal peptide	OG0000346	Archaeplastida	NA
EhG738.1	0.207238	0.0434814	3	3	1.15448	EhG6601	Cpn60_TCP1|PF00118.24|2.9e-144	unfolded protein binding	362283	none	other localisation	OG0003438	Archaeplastida	NA
EhG7703.4	-0.270749	0.0330959	3	3	0.828889	EhG41383	Enolase_C|PF00113.22|3.1e-127,MAAL_C|PF07476.11|3.7e-06,MR_MLE_C|PF13378.6|5.9e-08,Enolase_N|PF03952.16|3.7e-49	phosphopyruvate hydratase activity	2.81147e+83	none	other localisation	OG0000408	Archaeplastida	NA
EhG7711.1	0.405945	0.0294067	2	2	1.32496	EhG43373	DNMT1-RFD|PF12047.8|8e-11,DNA_methylase|PF00145.17|8.2e-35	DNA (cytosine-5-)-methyltransferase activity		none	other localisation	OG0004457	Archaeplastida	NA
EhG8964.1	-0.475749	0.0277853	3	3	0.719093	EhG14421	NA	amino acid	194037	none	signal peptide	OG0002994	Haptophyta	NA
EhG9231.4	-0.226003	0.0499513	3	3	0.855	EhG26558	NA	NA	4.03617e+35	none	other localisation	OG0009753	SAR/Hapista	NA
EhG9519.4	0.833585	0.0161795	3	3	1.78211	EhG27150	NA	cyclin-dependent protein serine/threonine kinase activity		none	other localisation	OG0000077	Archaeplastida	NA
EhG9529.10	-0.425354	0.0291356	3	3	0.744656	EhG27159	HCO3_cotransp|PF00955.21|5.5e-62,HCO3_cotransp|PF00955.21|2.7e-65	inorganic anion exchanger activity		none	other localisation	OG0000138	Archaeplastida	NA
EhG9613.3	-0.258967	0.0171007	3	3	0.835686	NA	HpcH_HpaI|PF03328.14|4.1e-05,PK|PF00224.21|2.5e-136,PK_C|PF02887.16|1.2e-18	pyruvate kinase activity		none	other localisation	OG0000192	Archaeplastida	NA

## Sheet: Legend
			ID	Protein ID
			logFC	log base 2 of fold change
			adj.P.Val	LIMMA adjusted p-value
			Number of replicates ZT6	ZT6 = 6 hours after dawn
			Number of replicates ZT18	ZT18 = 18 hours after dawn, 6 h after darkness
			Fold change	Day relative to night & C-cells relative to N-cells
			Locus	Putative alleles
			Pfam terms
			EggNog text	EggNog annotation
			Identical Emihu1 proteins
			Emihu1 annotation
			localization	Predicted by Hectare
			orthogroup	Orthogroup ID
			OG age	Age of the orthogroup to which this protein belongs
			OG notes
